# Supplementary material for: Nitrogen cost minimization is promoted by structural changes in the transcriptome of N-deprived Prochlorococcus cells
Source: PubMed Central journal article supplement (PMC5607370; doi:10.1038/ismej.2017.88), 2017-06-06
Supplement: ismej201788x8.pdf [file ismej201788x8.pdf]

Table S1: Raw Sequence Counts and Mean Sequence Counts per Read

| Time (hrs) | Treatment    | Original Sequences | Average Raw Counts |
|------------|--------------|--------------------|--------------------|
| 0          | Control      | 35531407           | 18071              |
| 0          | Control      | 26906967           | 13166              |
| 0          | Experimental | 27298646           | 13755              |
| 0          | Experimental | 21399153           | 10406              |
| 3          | Control      | 19799879           | 6903               |
| 3          | Control      | 13485385           | 7221               |
| 3          | Experimental | 20069084           | 10131              |
| 3          | Experimental | 14978176           | 9651               |
| 12         | Control      | 19731389           | 9963               |
| 12         | Control      | 24588668           | 12342              |
| 12         | Experimental | 27804712           | 13699              |
| 12         | Experimental | 34846401           | 17186              |
| 24         | Control      | 24719832           | 11746              |
| 24         | Control      | 24060503           | 11173              |
| 24         | Experimental | 23942075           | 12505              |
| 24         | Experimental | 33349917           | 16182              |
