# Supplementary material for: Nitrogen cost minimization is promoted by structural changes in the transcriptome of N-deprived Prochlorococcus cells
Source: PubMed Central journal article supplement (PMC5607370; doi:10.1038/ismej.2017.88), 2017-06-06
Supplement: ismej201788x9.pdf [file ismej201788x9.pdf]

Table S2. Correlation of expression values between two datasets -- this study and Tolonen et al. (2006).

|                |                                       | 3 Hours Post Starvation<br>(This Study) | 12 Hours Post<br>Starvation (This Study) | 24 Hours Post<br>Starvation (This Study) |
|----------------|---------------------------------------|-----------------------------------------|------------------------------------------|------------------------------------------|
| All Data       | 3 Hours Post<br>Starvation (Tolonen)  | 0.007                                   | 0.318                                    | 0.329                                    |
|                | 12 Hours Post<br>Starvation (Tolonen) | 0.028                                   | 0.553                                    | 0.538                                    |
|                | 24 Hours Post<br>Starvation (Tolonen) | 0.016                                   | 0.589                                    | 0.584                                    |
| Top 50% Values | 3 Hours Post<br>Starvation (Tolonen)  | -0.004                                  | 0.377                                    | 0.408                                    |
|                | 12 Hours Post<br>Starvation (Tolonen) | -0.004                                  | 0.647                                    | 0.638                                    |
|                | 24 Hours Post<br>Starvation (Tolonen) | -0.008                                  | 0.690                                    | 0.723                                    |
