# Supplementary material for: Nitrogen cost minimization is promoted by structural changes in the transcriptome of N-deprived Prochlorococcus cells
Source: PubMed Central journal article supplement (PMC5607370; doi:10.1038/ismej.2017.88), 2017-06-06
Supplement: ismej201788x10.pdf [file ismej201788x10.pdf]

Table S3. Gene Expression For Genes with Top 50% Expression Values during 3 Hours Post Starvation

| Name   | Number | log2 Fold Change | Standard Deviation | Standard Error | p-value | Category                                              | Definition                                                       |
|--------|--------|------------------|--------------------|----------------|---------|-------------------------------------------------------|------------------------------------------------------------------|
| PM0001 | 2      | 2.23             | 0.10               | 0.07           | 0.00    | DNA replication, recombination, and repair            | DNA polymerase III, beta chain                                   |
| PM0008 | 2      | 2.39             | 0.48               | 0.34           | 0.01    | Conserved hypothetical protein                        | conserved hypothetical protein                                   |
| PM0013 | 2      | 0.16             | 0.31               | 0.22           | 1.00    | Fatty acid, phospholipid and sterol metabolism        | RNA-binding region RNP-1 (RNA recognition motif)                 |
| PM0015 | 2      | -1.69            | 0.59               | 0.41           | 0.27    | Conserved hypothetical protein                        | Domain of unknown function DUF25                                 |
| PM0016 | 2      | 2.00             | 0.00               | 0.00           | 0.02    | Chaperones                                            | Heat shock protein GrpE                                          |
| PM0017 | 2      | 0.57             | 0.10               | 0.07           | 0.85    | Chaperones                                            | DnaJ protein                                                     |
| PM0020 | 2      | 5.88             | 2.68               | 1.89           | 0.00    | Conserved hypothetical protein                        | conserved hypothetical protein                                   |
| PM0023 | 2      | -0.73            | 1.62               | 1.15           | 1.00    | CO2 fixation                                          | Glyceraldehyde 3-phosphate dehydrogenase(NADP+)[phosphorylating] |
| PM0025 | 2      | 2.18             | 0.56               | 0.40           | 0.01    | Protein modification and translation factors          | Cyclophilin-type peptidyl-prolyl cis-trans isomerase             |
| PM0026 | 2      | 0.09             | 0.27               | 0.19           | 1.00    | Protein modification and translation factors          | Elongation factor P (EF-P)                                       |
| PM0027 | 2      | 2.07             | 0.61               | 0.43           | 0.02    | Fatty acid, phospholipid and sterol metabolism        | Biotin / Lipoyl attachment:Acetyl-CoA biotin carrier...          |
| PM0030 | 2      | 0.36             | 0.04               | 0.03           | 0.90    | Protein modification and translation factors          | possible Transcription factor TFIIID (or TATA-b                  |
| PM0031 | 2      | -0.81            | 1.12               | 0.79           | 1.00    | DNA replication, recombination, and repair            | HNH endonuclease:HNH nuclease                                    |
| PM0032 | 2      | -0.46            | 0.00               | 0.00           | 1.00    | Protein and peptide secretion                         | possible Bacterial type II secretion system pr                   |
| PM0033 | 2      | -1.70            | 0.77               | 0.55           | 0.25    | Conserved hypothetical protein                        | conserved hypothetical protein                                   |
| PM0034 | 2      | 2.41             | 0.04               | 0.03           | 0.01    | Conserved hypothetical protein                        | conserved hypothetical protein                                   |
| PM0035 | 2      | 0.87             | 0.60               | 0.43           | 1.00    | Hydrogenase                                           | soluble hydrogenase small subunit                                |
| PM0037 | 2      | -2.08            | 0.64               | 0.45           | 0.01    | Purine ribonucleotide biosynthesis                    | Glutamine amidotransferase class-i:GMP synthase                  |
| PM0043 | 2      | 0.25             | 0.71               | 0.51           | 1.00    | Other                                                 | Flavoprotein                                                     |
| PM0046 | 2      | 1.69             | 0.41               | 0.29           | 0.08    | Interconversions and salvage of nucleosides and nucle | Nucleoside diphosphate kinase                                    |
| PM0048 | 2      | 0.40             | 0.21               | 0.15           | 1.00    | Aminoacyl tRNA synthetases and tRNA modification      | Glutamyl-tRNA (Gln) amidotransferase subunit B                   |
| PM0051 | 2      | 4.52             | 0.18               | 0.13           | 0.00    | Conserved hypothetical protein                        | conserved hypothetical protein                                   |
| PM0055 | 2      | 2.43             | 0.72               | 0.51           | 0.00    | Conserved hypothetical protein                        | conserved hypothetical protein                                   |
| PM0056 | 2      | 3.76             | 0.03               | 0.02           | 0.00    | Conserved hypothetical protein                        | conserved hypothetical protein                                   |
| PM0058 | 2      | 0.12             | 1.33               | 0.94           | 1.00    | Conserved hypothetical protein                        | conserved hypothetical protein                                   |
| PM0059 | 2      | -1.66            | 0.48               | 0.34           | 0.29    | Conserved hypothetical protein                        | conserved hypothetical protein                                   |
| PM0060 | 2      | 0.06             | 0.68               | 0.48           | 1.00    | Fatty acid, phospholipid and sterol metabolism        | acetyl-CoA carboxylase, biotin carboxylase subunit               |
| PM0061 | 2      | 0.70             | 0.84               | 0.59           | 0.65    | Other                                                 | YGGT family, conserved hypothetical integral membrane protein    |
| PM0062 | 2      | 3.87             | 1.92               | 1.36           | 0.00    | Photosystem II                                        | photosystem II PsbX protein                                      |
| PM0063 | 2      | -0.85            | 0.32               | 0.22           | 1.00    | Conserved hypothetical protein                        | conserved hypothetical protein                                   |
| PM0064 | 2      | -1.05            | 0.38               | 0.27           | 0.71    | Adaptations and atypical conditions                   | possible high light inducible protein                            |
| PM0068 | 2      | 0.83             | 0.70               | 0.49           | 0.71    | Regulatory functions                                  | putative formylmethionine deformylase                            |
| PM0073 | 2      | 0.54             | 1.12               | 0.79           | 1.00    | Transport and binding proteins                        | ABC transporter, membrane component                              |
| PM0075 | 2      | -1.42            | 2.31               | 1.63           | 0.00    | Conserved hypothetical protein                        | conserved hypothetical protein                                   |
| PM0078 | 2      | -1.43            | 1.79               | 1.26           | 0.69    | Other                                                 | possible 4'-phosphopantetheinyl transferase family protein       |
| PM0079 | 2      | -0.42            | 1.15               | 0.81           | 1.00    | Transport and binding proteins                        | putative bacterioferritin comigratory (BCP) protein              |
| PM0081 | 2      | 0.98             | 0.83               | 0.59           | 0.74    | Serine family / Sulfur assimilation                   | Phosphoadenosine phosphosulfate reductase                        |
| PM0082 | 2      | -1.91            | 0.22               | 0.16           | 0.08    | Regulatory functions                                  | putative NADH dehydrogenase, transport associated                |
| PM0083 | 2      | -0.39            | 0.37               | 0.26           | 1.00    | Regulatory functions                                  | putative sodium/sulfate transporter, DASS family                 |
| PM0085 | 2      | 1.10             | 0.49               | 0.35           | 0.61    | Regulatory functions                                  | putative potassium channel, VIC family                           |
| PM0086 | 2      | 1.46             | 1.73               | 1.22           | 0.39    | Conserved hypothetical protein                        | Conserved hypothetical protein                                   |
| PM0087 | 2      | -1.03            | 1.08               | 0.77           | 0.48    | Conserved hypothetical protein                        | conserved hypothetical protein                                   |
| PM0088 | 2      | -1.00            | 0.18               | 0.12           | 1.00    | Conserved hypothetical protein                        | conserved hypothetical protein                                   |
| PM0091 | 2      | 1.21             | 0.29               | 0.21           | 1.00    | Conserved hypothetical protein                        | conserved hypothetical protein                                   |
| PM0092 | 2      | 0.91             | 1.17               | 0.83           | 0.47    | Conserved hypothetical protein                        | conserved hypothetical protein                                   |
| PM0093 | 2      | -1.87            | 0.41               | 0.29           | 1.00    | Adaptations and atypical conditions                   | possible high light inducible protein                            |
| PM0095 | 2      | -0.20            | 0.78               | 0.55           | 1.00    | Other                                                 | similar to serum resistance locus BrkB                           |
| PM0099 | 2      | -0.50            | 0.31               | 0.22           | 0.95    | Conserved hypothetical protein                        | conserved hypothetical protein                                   |
| PM0101 | 2      | 0.25             | 0.16               | 0.11           | 1.00    | Conserved hypothetical protein                        | conserved hypothetical protein                                   |
| PM0103 | 2      | 1.18             | 0.68               | 0.48           | 0.49    | Conserved hypothetical protein                        | conserved hypothetical protein                                   |
| PM0105 | 2      | -3.02            | 1.74               | 1.23           | 0.03    | Riboflavin                                            | RibD/RibC C-terminal domain                                      |
| PM0106 | 2      | -2.05            | 0.35               | 0.25           | 0.57    | Other                                                 | 6-pyruvoyl tetrahydropterin synthase                             |
| PM0111 | 2      | -2.27            | 0.03               | 0.02           | 0.01    | Conserved hypothetical protein                        | conserved hypothetical protein                                   |
| PM0114 | 2      | -0.86            | 0.06               | 0.04           | 0.80    | Conserved hypothetical protein                        | conserved hypothetical protein                                   |
| PM0115 | 2      | -0.72            | 0.27               | 0.19           | 1.00    | Carotenoid                                            | zeta-carotene desaturase                                         |
| PM0116 | 2      | -0.92            | 0.17               | 0.12           | 1.00    | Conserved hypothetical protein                        | conserved hypothetical protein                                   |
| PM0117 | 2      | -1.82            | 1.76               | 1.25           | 0.61    | Conserved hypothetical protein                        | conserved hypothetical protein                                   |
| PM0120 | 2      | -1.58            | 0.50               | 0.35           | 0.08    | Cell division                                         | putative cell division inhibitor                                 |
| PM0121 | 2      | -0.54            | 0.23               | 0.16           | 1.00    | Conserved hypothetical protein                        | conserved hypothetical protein                                   |
| PM0123 | 2      | 0.63             | 2.65               | 1.87           | 1.00    | Serine family / Sulfur assimilation                   | O-acetylsulfate (thiol)-lyase A                                  |
| PM0124 | 2      | -1.88            | 1.47               | 1.04           | 0.10    | Conserved hypothetical protein                        | conserved hypothetical protein in cyanobacteria                  |
| PM0125 | 2      | -1.21            | 2.22               | 1.57           | 0.81    | Transport and binding proteins                        | possible ABC transporter, ATP-binding component                  |
| PM0126 | 2      | 1.23             | 0.57               | 0.40           | 0.61    | Other                                                 | possible Herpesvirus UL6 like                                    |
| PM0128 | 2      | 2.03             | 0.02               | 0.01           | 0.05    | Regulatory functions                                  | two-component response regulator                                 |
| PM0132 | 2      | -0.47            | 0.59               | 0.42           | 1.00    | Other                                                 | cyanobacterial conserved hypothetical                            |
| PM0133 | 2      | -0.37            | 0.31               | 0.22           | 0.86    | Radiation sensitivity                                 | putative DNA repair protein Rada                                 |
| PM0134 | 2      | 2.57             | 0.76               | 0.54           | 0.00    | Regulatory functions                                  | two-component response regulator                                 |
| PM0136 | 2      | -0.40            | 0.11               | 0.08           | 1.00    | Fatty acid, phospholipid and sterol metabolism        | 3-oxoacyl-[acyl-carrier-protein] synthase III                    |
| PM0137 | 2      | -0.81            | 1.58               | 1.11           | 1.00    | Fatty acid, phospholipid and sterol metabolism        | Malonyl coenzyme A-acyl carrier protein transacylase             |
| PM0138 | 2      | -0.27            | 0.65               | 0.46           | 0.89    | Fatty acid, phospholipid and sterol metabolism        | putative 1-acyl-sn-glycerol-3-phosphate acyltransferase          |
| PM0139 | 2      | -0.10            | 0.41               | 0.29           | 1.00    | Conserved hypothetical protein                        | conserved hypothetical protein                                   |
| PM0140 | 2      | 2.86             | 1.93               | 1.36           | 0.00    | Regulatory functions                                  | putative Ycf34                                                   |
| PM0142 | 2      | 2.14             | 0.31               | 0.22           | 0.00    | Fatty acid, phospholipid and sterol metabolism        | RNA-binding region RNP-1 (RNA recognition motif)                 |
| PM0143 | 2      | 0.18             | 0.12               | 0.09           | 1.00    | Carotenoid                                            | Squalene and phytoene synthases                                  |
| PM0144 | 2      | -1.60            | 1.09               | 0.77           | 0.46    | Carotenoid                                            | phytoene desaturase                                              |
| PM0145 | 2      | -0.85            | 0.47               | 0.33           | 1.00    | Conserved hypothetical protein                        | conserved hypothetical protein                                   |
| PM0146 | 2      | -0.09            | 0.82               | 0.58           | 1.00    | Conserved hypothetical protein                        | conserved hypothetical protein                                   |
| PM0147 | 2      | 0.05             | 0.91               | 0.64           | 1.00    | Regulatory functions                                  | putative Rubisco transcriptional regulator                       |
| PM0149 | 2      | -1.45            | 0.33               | 0.23           | 0.49    | NADH dehydrogenase                                    | putative NADH Dehydrogenase (complex I) subunit (chain 5)        |
| PM0150 | 2      | -1.59            | 0.30               | 0.22           | 0.45    | NADH dehydrogenase                                    | putative NADH dehydrogenase subunit (chain 4)                    |
| PM0153 | 2      | -0.43            | 0.09               | 0.07           | 1.00    | Conserved hypothetical protein                        | conserved hypothetical protein                                   |
| PM0154 | 2      | -0.19            | 0.02               | 0.01           | 1.00    | Regulatory functions                                  | Bacterial regulatory protein, LuxR family                        |
| PM0159 | 2      | -1.62            | 0.23               | 0.16           | 0.65    | NADH dehydrogenase                                    | putative NADH Dehydrogenase subunit                              |
| PM0160 | 2      | -1.25            | 0.22               | 0.16           | 0.47    | NADH dehydrogenase                                    | putative respiratory-chain NADH dehydrogenase subunit            |
| PM0163 | 2      | 0.02             | 0.41               | 0.29           | 1.00    | Conserved hypothetical protein                        | conserved hypothetical protein                                   |
| PM0164 | 2      | -0.65            | 0.01               | 0.01           | 1.00    | Aromatic amino acid family                            | Tryptophan synthase, beta chain:Pyridoxal-5'-phosphate-depend... |
| PM0166 | 2      | #NAME?           | NA                 | NA             | 0.01    | Serine family / Sulfur assimilation                   | Adenylylsulfate kinase                                           |
| PM0172 | 2      | 2.48             | 0.76               | 0.54           | 0.00    | NADH dehydrogenase                                    | putative NADH dehydrogenase subunit                              |
| PM0179 | 2      | 1.18             | 0.18               | 0.13           | 0.47    | Other                                                 | Glutaredoxin                                                     |
| PM0180 | 2      | 1.70             | 0.67               | 0.48           | 0.09    | Protein modification and translation factors          | peptide chain release factor RF-2                                |
| PM0184 | 2      | -1.82            | 0.14               | 0.10           | 0.29    | Aromatic amino acid family                            | para-aminobenzoate synthase component II                         |
| PM0195 | 2      | -0.50            | 0.20               | 0.14           | 1.00    | Other                                                 | Phosphoglycerate kinase                                          |
| PM0200 | 2      | 1.64             | 0.32               | 0.23           | 0.05    | Degradation of RNA                                    | possible ribonuclease HI                                         |
| PM0201 | 2      | 1.25             | 0.05               | 0.04           | 1.00    | Ribosomal proteins                                    | S05 ribosomal protein L7/L12                                     |
| PM0202 | 2      | 0.89             | 0.33               | 0.24           | 0.89    | Ribosomal proteins                                    | S05 ribosomal protein L10                                        |
| PM0203 | 2      | -1.30            | 0.18               | 0.12           | 1.00    | Ribosomal proteins                                    | S05 ribosomal protein L1                                         |
| PM0204 | 2      | -1.51            | 0.40               | 0.28           | 1.00    | Ribosomal proteins                                    | S05 ribosomal protein L11                                        |
| PM0205 | 2      | 0.38             | 1.24               | 0.87           | 1.00    | RNA synthesis, modification, and DNA transcription    | transcription antitermination protein, NusG                      |
| PM0206 | 2      | -0.24            | 0.45               | 0.32           | 1.00    | Protein and peptide secretion                         | putative prepeptidyl transferase, SecE subunit                   |
| PM0208 | 2      | 0.60             | 0.13               | 0.09           | 1.00    | Other                                                 | Enolase                                                          |
| PM0209 | 2      | 0.25             | 0.45               | 0.31           | 1.00    | Other                                                 | possible kinase                                                  |
| PM0211 | 2      | -1.78            | 0.82               | 0.58           | 0.23    | Other                                                 | FAD-dependent pyridine nucleotide-disulphide oxidoreductase      |
| PM0212 | 2      | -2.06            | 1.57               | 1.11           | 0.30    | Conserved hypothetical protein                        | conserved hypothetical protein                                   |
| PM0213 | 2      | -1.30            | 3.11               | 2.20           | 0.85    | Transport and binding proteins                        | putative sodium-dependent bicarbonate transporter                |
| PM0214 | 2      | -0.99            | 0.88               | 0.63           | 1.00    | Regulatory functions                                  | putative sulfate transporter                                     |
| PM0216 | 2      | 1.05             | 1.52               | 1.08           | 0.67    | Adaptations and atypical conditions                   | Glyoxalase/Bleomycin resistance protein/Dioxygenase superfamily  |
| PM0218 | 2      | -1.34            | 0.17               | 0.12           | 0.48    | Other                                                 | GTP1/OBG family                                                  |
| PM0219 | 2      | -2.30            | 1.80               | 1.27           | 0.01    | Conserved hypothetical protein                        | conserved hypothetical                                           |
| PM0220 | 2      | -1.62            | 0.29               | 0.20           | 1.00    | Other                                                 | No Cyanobase Name                                                |
| PM0223 | 2      | -1.77            | 0.01               | 0.00           | 1.00    | Photosystem II                                        | Photosystem II PsbA protein (D1)                                 |
| PM0224 | 2      | 2.00             | 0.70               | 0.49           | 0.04    | Aromatic amino acid family                            | Chorismate synthase                                              |
| PM0226 | 2      | 0.95             | 0.62               | 0.44           | 1.00    | Cell division                                         | cell division protein FtsH2                                      |
| PM0228 | 2      | 1.07             | 1.23               | 0.87           | 1.00    | Photosystem II                                        | Photosystem II manganese-stabilizing protein                     |

|         |   |           |      |      |                                                         |                                                                              |
|---------|---|-----------|------|------|---------------------------------------------------------|------------------------------------------------------------------------------|
| PM00231 | 2 | 0.75      | 0.46 | 0.32 | 0.90 Conserved hypothetical protein                     | conserved hypothetical protein                                               |
| PM00235 | 2 | 0.59      | 0.69 | 0.49 | 1.00 Aminoacyl tRNA synthetases and tRNA modification   | Glutamyl-tRNA(Gln) amidotransferase subunit C                                |
| PM00237 | 2 | -0.51     | 0.22 | 0.15 | 1.00 Conserved hypothetical protein                     | conserved hypothetical protein                                               |
| PM00239 | 2 | -0.60     | 0.49 | 0.35 | 0.83 Conserved hypothetical protein                     | conserved hypothetical protein                                               |
| PM00242 | 2 | -1.94     | 1.35 | 0.96 | 0.10 Thiamine                                           | thioredoxin-like protein TxIA                                                |
| PM00243 | 2 | -1.24     | 0.01 | 0.01 | 0.50 Pyrimidine ribonucleotide biosynthesis             | possible Thy1 protein homolog                                                |
| PM00244 | 2 | -1.11     | 0.25 | 0.18 | 1.00 Purine ribonucleotide biosynthesis                 | dCTP Deaminase                                                               |
| PM00245 | 2 | 1.28      | 0.25 | 0.28 | 0.39 Cobalamin, heme, phycobilin and porphyrin          | colijilalamin adenosyltransferase                                            |
| PM00246 | 2 | 0.57      | 0.11 | 0.08 | 1.00 Transport and binding proteins                     | Global nitrogen regulatory protein, CRP family of transcriptional regulators |
| PM00251 | 2 | -0.83     | 0.59 | 0.42 | 1.00 Photosystem II                                     | Photosystem II PsbH protein                                                  |
| PM00252 | 2 | -1.67     | 0.38 | 0.27 | 0.90 Photosystem II                                     | Photosystem II reaction centre N protein (psbN)                              |
| PM00253 | 2 | -0.18     | 0.30 | 0.21 | 1.00 Photosystem II                                     | photosystem II reaction center PsbI protein                                  |
| PM00254 | 2 | -0.65     | 1.23 | 0.87 | 1.00 Conserved hypothetical protein                     | conserved hypothetical protein                                               |
| PM00258 | 2 | 2.05      | 0.97 | 0.69 | 0.03 Other                                              | Serine hydroxymethyltransferase (SHMT)                                       |
| PM00259 | 2 | -1.60     | 0.25 | 0.17 | 0.13 Conserved hypothetical protein                     | conserved hypothetical protein                                               |
| PM00260 | 2 | #NAME? NA | NA   | 0.00 | Conserved hypothetical protein                          | conserved hypothetical protein                                               |
| PM00263 | 2 | 3.67      | 0.39 | 0.28 | 0.02 Transport and binding proteins                     | Ammonium transporter family                                                  |
| PM00264 | 2 | -0.26     | 0.45 | 0.32 | 1.00 Murein sacculus and peptidoglycan                  | LytB protein homolog                                                         |
| PM00265 | 2 | 1.04      | 0.43 | 0.30 | 1.00 Conserved hypothetical protein                     | conserved hypothetical protein                                               |
| PM00267 | 2 | #NAME? NA | NA   | 0.60 | Other                                                   | probable esterase                                                            |
| PM00268 | 2 | -0.05     | 0.19 | 0.14 | 1.00 Conserved hypothetical protein                     | conserved hypothetical protein                                               |
| PM00272 | 2 | -0.80     | 0.55 | 0.39 | 1.00 Photosystem II                                     | Photosystem II protein PskK                                                  |
| PM00273 | 2 | -0.72     | 0.45 | 0.32 | 0.68 Other                                              | probable oxidoreductase                                                      |
| PM00275 | 2 | 0.58      | 1.18 | 0.83 | 1.00 Pyrimidine ribonucleotide biosynthesis             | Orotate phosphoribosyltransferase                                            |
| PM00278 | 2 | -1.13     | 0.70 | 0.50 | 0.63 Other                                              | Phosphotransferase superclass                                                |
| PM00279 | 2 | -1.49     | 0.54 | 0.38 | 0.40 Conserved hypothetical protein                     | conserved hypothetical protein                                               |
| PM00282 | 2 | 1.73      | 0.27 | 0.19 | 0.15 Fatty acid, phospholipid and sterol metabolism     | enoyl-[acyl-carrier-protein] reductase                                       |
| PM00284 | 2 | -1.94     | 0.31 | 0.22 | 0.02 Regulatory functions                               | putative pleiotropic regulatory protein                                      |
| PM00286 | 2 | -1.32     | 1.49 | 1.06 | 0.47 Other                                              | NUDIX hydrolase                                                              |
| PM00289 | 2 | -0.56     | 0.20 | 0.14 | 1.00 Transport and binding proteins                     | possible ABC transporter                                                     |
| PM00290 | 2 | -1.00     | 0.13 | 0.09 | 0.61 Transport and binding proteins                     | possible ABC transporter, ATP binding component                              |
| PM00293 | 2 | 0.51      | 0.47 | 0.33 | 1.00 NADH dehydrogenase                                 | putative respiratory-chain NADH dehydrogenase subunit                        |
| PM00294 | 2 | -0.84     | 0.02 | 0.01 | 1.00 NADH dehydrogenase                                 | putative NADH Dehydrogenase (complex I) subunit (chain 3)                    |
| PM00295 | 2 | -2.22     | 0.46 | 0.33 | 0.10 Other                                              | probable rubredoxin                                                          |
| PM00296 | 2 | -0.22     | 0.30 | 0.21 | 1.00 Conserved hypothetical protein                     | conserved hypothetical protein                                               |
| PM00297 | 2 | 0.55      | 0.32 | 0.22 | 1.00 Photosystem II                                     | Cytochrome b559 alpha-subunit                                                |
| PM00298 | 2 | 0.42      | 0.23 | 0.16 | 1.00 Photosystem II                                     | Cytochrome b559 beta-subunit                                                 |
| PM00299 | 2 | 0.79      | 0.06 | 0.04 | 1.00 Photosystem II                                     | photosystem II PskI protein                                                  |
| PM00300 | 2 | 0.57      | 0.07 | 0.05 | 1.00 Photosystem II                                     | photosystem II PskJ protein                                                  |
| PM00301 | 2 | -0.91     | 0.24 | 0.17 | 1.00 Other                                              | 5'-methylthioadenosine phosphorylase                                         |
| PM00305 | 2 | -0.95     | 0.03 | 0.02 | 1.00 Phycobilisome                                      | Phycobilisome protein                                                        |
| PM00306 | 2 | -1.43     | 0.03 | 0.02 | 0.60 Phycobilisome                                      | phycocerythrin linker protein CpeS homolog                                   |
| PM00307 | 2 | -1.41     | 0.45 | 0.32 | 1.00 Conserved hypothetical protein                     | hypothetical                                                                 |
| PM00308 | 2 | -0.52     | 0.74 | 0.52 | 0.92 Conserved hypothetical protein                     | conserved hypothetical protein                                               |
| PM00309 | 2 | -2.76     | 0.32 | 0.22 | 0.00 Other                                              | possible Pollen allergen                                                     |
| PM00311 | 2 | -2.01     | 0.81 | 0.57 | 0.36 Aspartate family                                   | S-adenosylmethionine synthetase                                              |
| PM00312 | 2 | -0.02     | 0.15 | 0.11 | 1.00 Ribosomal proteins                                 | 30S ribosomal protein S1, homolog A                                          |
| PM00313 | 2 | 3.35      | 0.49 | 0.35 | 0.00 Conserved hypothetical protein                     | conserved hypothetical protein                                               |
| PM00314 | 2 | -0.31     | 0.20 | 0.14 | 1.00 Photosystem II                                     | Photosystem II PskT protein                                                  |
| PM00315 | 2 | -0.64     | 0.54 | 0.38 | 1.00 Photosystem II                                     | Photosystem II PskB protein (CP47)                                           |
| PM00316 | 2 | -0.61     | 0.46 | 0.33 | 1.00 Soluble electron carriers                          | possible ferredoxin                                                          |
| PM00317 | 2 | -1.62     | 1.22 | 0.86 | 0.85 Photosystem II                                     | possible Photosystem II reaction center M protein (PsbM)                     |
| PM00318 | 2 | -1.26     | 1.16 | 0.82 | 1.00 Cobalamin, heme, phycobilin and porphyrin          | putative protein methyltransferase                                           |
| PM00321 | 2 | 2.31      | 1.56 | 1.10 | 0.00 Cell division                                      | putative septum site-determining protein MinD                                |
| PM00324 | 2 | -1.47     | 1.13 | 0.80 | 0.95 Detoxification                                     | PDZ domain [also known as DHR or GLGF]:Tail specific protease...             |
| PM00325 | 2 | -0.74     | 0.65 | 0.46 | 1.00 Cytochrome b6/f complex                            | Cytochrome b6                                                                |
| PM00326 | 2 | 1.50      | 0.37 | 0.26 | 1.00 Cytochrome b6/f complex                            | PetD protein (subunit IV of the Cytochrome b6f complex)                      |
| PM00327 | 2 | 0.76      | 0.54 | 0.38 | 1.00 Other                                              | putative neutral invertase-like protein                                      |
| PM00328 | 2 | 0.75      | 1.02 | 0.72 | 1.00 DNA replication, recombination, and repair         | Formamidopyrimidine-DNA glycolase (FAPY-DNA glycolase)                       |
| PM00329 | 2 | 0.92      | 0.24 | 0.17 | 1.00 Photosystem I                                      | Photosystem I PsaE protein (subunit IV)                                      |
| PM00333 | 2 | -0.56     | 0.60 | 0.43 | 0.95 Other                                              | GCNS-related N-acetyltransferase                                             |
| PM00334 | 2 | -0.06     | 0.08 | 0.06 | 1.00 Conserved hypothetical protein                     | conserved hypothetical protein                                               |
| PM00336 | 2 | 3.71      | 0.71 | 0.50 | 0.00 Conserved hypothetical protein                     | conserved hypothetical                                                       |
| PM00337 | 2 | -2.39     | 0.16 | 0.11 | 0.00 Conserved hypothetical protein                     | conserved hypothetical protein                                               |
| PM00338 | 2 | 3.26      | 0.82 | 0.58 | 0.00 Conserved hypothetical protein                     | conserved hypothetical                                                       |
| PM00339 | 2 | -0.21     | 0.25 | 0.18 | 1.00 Carotenoid                                         | Bacterial-type phytoene dehydrogenase                                        |
| PM00341 | 2 | -1.91     | 1.84 | 1.30 | 0.00 Conserved hypothetical protein                     | conserved hypothetical                                                       |
| PM00342 | 2 | -1.87     | 0.60 | 0.43 | 0.02 Other                                              | possible Helixer component proteinase                                        |
| PM00343 | 2 | 2.52      | 0.00 | 0.00 | 0.00 Other                                              | mttA/Hcf106 family                                                           |
| PM00345 | 2 | -2.67     | 0.35 | 0.25 | 0.00 Transport and binding proteins                     | putative bacterioferritin comigratory protein                                |
| PM00346 | 2 | -0.80     | 1.17 | 0.83 | 1.00 Conserved hypothetical protein                     | conserved hypothetical protein                                               |
| PM00347 | 2 | -0.74     | 0.17 | 0.12 | 1.00 Conserved hypothetical protein                     | conserved hypothetical                                                       |
| PM00348 | 2 | -0.95     | 0.29 | 0.20 | 1.00 Other                                              | possible Spectrin repeat                                                     |
| PM00350 | 2 | -2.12     | 0.86 | 0.61 | 0.14 Regulatory functions                               | possible TIR domain                                                          |
| PM00351 | 2 | #NAME? NA | NA   | 0.00 | Cobalamin, heme, phycobilin and porphyrin               | possible Small, acid-soluble spore proteins, a                               |
| PM00356 | 2 | -1.01     | 0.58 | 0.41 | 0.57 Fatty acid, phospholipid and sterol metabolism     | Alpha/beta hydrolase fold:Esterase/lipase/thioesterase family...             |
| PM00363 | 2 | #NAME? NA | NA   | 0.38 | Regulatory functions                                    | possible MarR family                                                         |
| PM00364 | 2 | -1.04     | 0.05 | 0.03 | 1.00 Other                                              | possible Malic enzyme                                                        |
| PM00365 | 2 | -1.07     | 0.73 | 0.52 | 0.56 Other                                              | possible DsrE-like protein                                                   |
| PM00366 | 2 | 0.03      | 0.87 | 0.61 | 1.00 Transport and binding proteins                     | Type-1 copper (blue) domain                                                  |
| PM00367 | 2 | -2.39     | 1.72 | 1.22 | 0.07 Conserved hypothetical protein                     | conserved hypothetical protein                                               |
| PM00368 | 2 | -0.19     | 0.27 | 0.19 | 1.00 Conserved hypothetical protein                     | conserved hypothetical protein                                               |
| PM00370 | 2 | -1.98     | 0.91 | 0.65 | 0.09 Transport and binding proteins                     | putative cyanate ABC transporter, substrate binding protein                  |
| PM00371 | 2 | 0.08      | 1.47 | 1.04 | 1.00 Transport and binding proteins                     | putative cyanate ABC transporter                                             |
| PM00373 | 2 | 3.49      | 2.50 | 1.77 | 0.00 Other                                              | Cyanate lyase                                                                |
| PM00374 | 2 | -0.04     | 0.34 | 0.24 | 1.00 Other                                              | mttA/Hcf106 family                                                           |
| PM00377 | 2 | 1.11      | 0.18 | 0.13 | 0.52 Conserved hypothetical protein                     | hypothetical                                                                 |
| PM00378 | 2 | -1.14     | 0.80 | 0.56 | 1.00 Conserved hypothetical protein                     | conserved hypothetical protein                                               |
| PM00379 | 2 | 3.57      | 2.46 | 1.74 | 0.00 Conserved hypothetical protein                     | hypothetical                                                                 |
| PM00383 | 2 | -1.74     | 0.44 | 0.31 | 0.18 Transport and binding proteins                     | probable periplasmic protein                                                 |
| PM00388 | 2 | -0.87     | 2.00 | 1.41 | 1.00 Chemotaxis                                         | putative similar to tRNA-[MS2]O[6A]-hydroxylase                              |
| PM00395 | 2 | 0.83      | 0.60 | 0.43 | 1.00 Conserved hypothetical protein                     | conserved hypothetical protein                                               |
| PM00400 | 2 | -1.26     | 1.93 | 1.36 | 0.23 Adaptations and atypical conditions                | light repressed protein A homolog                                            |
| PM00403 | 2 | -0.53     | 0.58 | 0.41 | 1.00 Conserved hypothetical protein                     | conserved hypothetical protein                                               |
| PM00405 | 2 | 1.84      | 1.00 | 0.71 | 0.38 Transport and binding proteins                     | Dihydroalloamide acetyltransferase component (E2) of pyruvate de             |
| PM00407 | 2 | 0.23      | 0.40 | 0.28 | 1.00 Serine family / Sulfur assimilation                | O-acetylserine (thiol)-lyase A                                               |
| PM00410 | 2 | -0.72     | 0.82 | 0.58 | 1.00 Ribosomal proteins                                 | 30S ribosomal protein S4                                                     |
| PM00411 | 2 | -2.21     | 0.98 | 0.70 | 0.06 Conserved hypothetical protein                     | conserved hypothetical protein                                               |
| PM00412 | 2 | -0.32     | 1.64 | 1.16 | 0.78 Conserved hypothetical protein                     | conserved hypothetical protein                                               |
| PM00416 | 2 | 0.52      | 0.97 | 0.69 | 1.00 RNA synthesis, modification, and DNA transcription | SAM (and some other nucleotide) binding motif:Generic methyl-...             |
| PM00417 | 2 | -1.01     | 1.24 | 0.88 | 0.84 Conserved hypothetical protein                     | hypothetical                                                                 |
| PM00418 | 2 | 3.01      | 1.65 | 1.17 | 0.00 Other                                              | NifU-like protein                                                            |
| PM00428 | 2 | -0.49     | 0.96 | 0.68 | 1.00 Cobalamin, heme, phycobilin and porphyrin          | chlorophyll synthase 33 kD subunit                                           |
| PM00429 | 2 | -0.87     | 0.02 | 0.01 | 1.00 Conserved hypothetical protein                     | conserved hypothetical protein                                               |
| PM00435 | 2 | -0.59     | 0.46 | 0.32 | 1.00 NADH dehydrogenase                                 | putative NADH dehydrogenase (complex I) subunit (chain 2)                    |
| PM00436 | 2 | -1.33     | 0.86 | 0.61 | 0.68 DNA replication, recombination, and repair         | Prokaryotic DNA topoisomerase                                                |
| PM00441 | 2 | -0.62     | 0.52 | 0.37 | 1.00 Other                                              | Aldo/keto reductase family                                                   |
| PM00443 | 2 | 1.64      | 0.55 | 0.39 | 0.14 Conserved hypothetical protein                     | conserved hypothetical protein                                               |
| PM00445 | 2 | 0.54      | 1.75 | 1.24 | 1.00 Respiratory terminal oxidases                      | Cytochrome c oxidase, subunit I                                              |
| PM00446 | 2 | -0.08     | 0.20 | 0.14 | 1.00 Respiratory terminal oxidases                      | putative cytochrome c oxidase, subunit 2                                     |
| PM00447 | 2 | 0.23      | 0.54 | 0.38 | 1.00 Conserved hypothetical protein                     | conserved hypothetical protein                                               |
| PM00448 | 2 | 0.64      | 2.41 | 1.70 | 0.58 Cobalamin, heme, phycobilin and porphyrin          | putative protoheme IX farnesyltransferase                                    |
| PM00451 | 2 | -0.70     | 0.61 | 0.43 | 0.79 Other                                              | possible Arenavirus glycoprotein                                             |
| PM00452 | 2 | -0.74     | 0.33 | 0.23 | 1.00 Chaperones                                         | GroEL2 protein (Chaperonin cpn60 2)                                          |
| PM00453 | 2 | -1.84     | 1.33 | 0.94 | 0.14 Fatty acid, phospholipid and sterol metabolism     | 3-oxoacyl-[acyl-carrier-protein] reductase                                   |

|         |   |           |      |      |                                                           |                                                                        |
|---------|---|-----------|------|------|-----------------------------------------------------------|------------------------------------------------------------------------|
| PM00461 | 2 | 2.90      | 0.62 | 0.44 | 0.00 Cytochrome b6/f complex                              | Cytochrome f                                                           |
| PM00462 | 2 | 1.91      | 0.27 | 0.19 | 0.56 Cytochrome b6/f complex                              | Rieske iron-sulfur protein                                             |
| PM00465 | 2 | 3.42      | 0.45 | 0.32 | 0.00 Conserved hypothetical protein                       | hypothetical                                                           |
| PM00468 | 2 | 0.95      | 0.52 | 0.37 | 1.00 Photosystem I                                        | Photosystem I Psaj protein (subunit IX)                                |
| PM00469 | 2 | -0.05     | 0.66 | 0.47 | 1.00 Photosystem I                                        | Photosystem I Psaf protein (subunit III)                               |
| PM00470 | 2 | -1.11     | 0.81 | 0.57 | 0.68 Other                                                | probable o-sialoglycoprotein endopeptidase                             |
| PM00471 | 2 | -2.38     | 0.68 | 0.48 | 0.00 Adaptations and atypical conditions                  | possible high light inducible protein                                  |
| PM00472 | 2 | -0.93     | 0.15 | 0.11 | 0.64 Transport and binding proteins                       | putative Na <sup>+</sup> /H <sup>+</sup> antiporter, CPA1 family       |
| PM00473 | 2 | -0.30     | 0.90 | 0.64 | 1.00 Aminoacyl tRNA synthetases and tRNA modification     | Glutamyl-tRNA synthetase                                               |
| PM00474 | 2 | -0.93     | 0.42 | 0.30 | 1.00 Conserved hypothetical protein                       | Conserved hypothetical protein                                         |
| PM00475 | 2 | -1.23     | 0.37 | 0.26 | 1.00 Ribosomal proteins                                   | Ribosomal protein L19                                                  |
| PM00476 | 2 | -0.48     | 0.57 | 0.40 | 0.88 Conserved hypothetical protein                       | conserved hypothetical protein                                         |
| PM00477 | 2 | -0.23     | 0.23 | 0.16 | 1.00 Protein modification and translation factors         | putative methionine aminopeptidase                                     |
| PM00478 | 2 | -1.44     | 0.43 | 0.31 | 0.35 Conserved hypothetical protein                       | conserved hypothetical protein                                         |
| PM00479 | 2 | -1.66     | 0.87 | 0.62 | 0.25 Conserved hypothetical protein                       | conserved hypothetical protein                                         |
| PM00480 | 2 | 2.26      | 0.57 | 0.40 | 0.01 Conserved hypothetical protein                       | conserved hypothetical protein                                         |
| PM00481 | 2 | -1.34     | 1.62 | 1.15 | 0.29 Conserved hypothetical protein                       | conserved hypothetical protein                                         |
| PM00482 | 2 | 1.25      | 0.87 | 0.62 | 1.00 Other                                                | Band 7 protein                                                         |
| PM00483 | 2 | -0.30     | 0.24 | 0.17 | 1.00 Cobalamin, heme, phycobilin and porphyrin            | glutamate-1-semialdehyde 2,1-aminomutase                               |
| PM00485 | 2 | 3.03      | 0.54 | 0.38 | 0.00 Conserved hypothetical protein                       | conserved hypothetical protein                                         |
| PM00491 | 2 | -0.27     | 1.79 | 1.27 | 0.96 Other                                                | 4a-hydroxytetrahydrobiopterin dehydratase (PCD)                        |
| PM00492 | 2 | -0.85     | 1.18 | 0.84 | 0.87 Conserved hypothetical protein                       | conserved hypothetical protein                                         |
| PM00493 | 2 | -0.45     | 0.94 | 0.67 | 1.00 Other                                                | Carboxypeptidase Tag (M32) metallopeptidase                            |
| PM00494 | 2 | 0.99      | 0.37 | 0.26 | 0.81 Phosphorus compounds                                 | putative inorganic pyrophosphatase                                     |
| PM00495 | 2 | 1.31      | 0.14 | 0.10 | 0.38 Cobalamin, heme, phycobilin and porphyrin            | Porphobilinogen deaminase                                              |
| PM00496 | 2 | -0.46     | 0.03 | 0.02 | 1.00 RNA synthesis, modification, and DNA transcription   | Putative principal RNA polymerase sigma factor                         |
| PM00500 | 2 | -0.98     | 0.72 | 0.51 | 1.00 Conserved hypothetical protein                       | conserved hypothetical protein                                         |
| PM00501 | 2 | #NAME? NA | NA   |      | 0.57 Conserved hypothetical protein                       | conserved hypothetical protein                                         |
| PM00502 | 2 | 0.06      | 0.10 | 0.07 | 1.00 Conserved hypothetical protein                       | conserved hypothetical protein                                         |
| PM00503 | 2 | -0.81     | 0.69 | 0.49 | 0.72 Cobalamin, heme, phycobilin and porphyrin            | possible precorrin-6X reductase                                        |
| PM00506 | 2 | -1.08     | 1.09 | 0.77 | 0.61 Purine ribonucleotide biosynthesis                   | Adenylosuccinate synthetase                                            |
| PM00507 | 2 | -1.62     | 0.79 | 0.56 | 0.38 Photosystem II                                       | possible Photosystem II reaction center Psb27 protein                  |
| PM00508 | 2 | 0.85      | 0.91 | 0.64 | 1.00 Aminoacyl tRNA synthetases and tRNA modification     | Prolyl-tRNA synthetase                                                 |
| PM00510 | 2 | -1.33     | 0.14 | 0.10 | 1.00 Transposon-related functions                         | possible Reverse transcriptase (RNA-dependent                          |
| PM00511 | 2 | -1.40     | 0.70 | 0.50 | 1.00 Other                                                | Inorganic pyrophosphatase                                              |
| PM00515 | 2 | -1.31     | 0.14 | 0.10 | 0.36 Cobalamin, heme, phycobilin and porphyrin            | possible alpha-ribazole-5'-P phosphatase                               |
| PM00519 | 2 | -0.24     | 0.97 | 0.69 | 1.00 Other                                                | Transaldolase                                                          |
| PM00520 | 2 | -1.48     | 0.58 | 0.41 | 0.44 Other                                                | NAD binding site                                                       |
| PM00522 | 2 | -0.30     | 1.54 | 1.09 | 1.00 Pyrimidine ribonucleotide biosynthesis               | uridylyate kinase                                                      |
| PM00525 | 2 | -1.18     | 0.32 | 0.23 | 0.45 Other                                                | Ferrocyclase                                                           |
| PM00526 | 2 | 1.97      | 0.20 | 0.14 | 0.16 Branched chain family                                | Acetolactate synthase large subunit                                    |
| PM00530 | 2 | -1.68     | 0.83 | 0.59 | 0.41 Ribosomal proteins                                   | 30S ribosomal protein S1 homolog B, putative Nbp1                      |
| PM00532 | 2 | 1.07      | 0.83 | 0.59 | 1.00 Conserved hypothetical protein                       | conserved hypothetical protein                                         |
| PM00533 | 2 | -1.32     | 0.14 | 0.10 | 0.48 Conserved hypothetical protein                       | conserved hypothetical protein                                         |
| PM00534 | 2 | -0.72     | 0.77 | 0.55 | 0.81 Fatty acid, phospholipid and sterol metabolism       | acetyl-CoA carboxylase, alpha subunit                                  |
| PM00536 | 2 | 0.20      | 0.33 | 0.23 | 1.00 Folic acid                                           | putative GTP cyclohydrolase I                                          |
| PM00537 | 2 | -2.19     | 0.43 | 0.30 | 0.01 Aromatic amino acid family                           | phosphoribosylanthranilate isomerase                                   |
| PM00540 | 2 | 3.64      | 0.82 | 0.58 | 0.00 Photosystem I                                        | possible photosystem I reaction center subunit XII (PsaM)              |
| PM00541 | 2 | 2.72      | 0.46 | 0.33 | 0.00 Conserved hypothetical protein                       | conserved hypothetical protein                                         |
| PM00543 | 2 | -1.63     | 0.95 | 0.67 | 1.00 Cobalamin, heme, phycobilin and porphyrin            | Protochlorophyllide reductase iron-sulfur ATP-binding protein          |
| PM00544 | 2 | 0.88      | 0.41 | 0.29 | 1.00 Cobalamin, heme, phycobilin and porphyrin            | Light-independent protochlorophyllide reductase subunit B              |
| PM00545 | 2 | 1.79      | 0.06 | 0.04 | 1.00 Cobalamin, heme, phycobilin and porphyrin            | Light-independent protochlorophyllide reductase subunit N              |
| PM00546 | 2 | 3.19      | 0.60 | 0.43 | 0.00 Conserved hypothetical protein                       | conserved hypothetical                                                 |
| PM00548 | 2 | 0.06      | 1.55 | 1.10 | 1.00 Other                                                | HAM1 family protein                                                    |
| PM00549 | 2 | 4.96      | 0.45 | 0.32 | 0.00 CO2 fixation                                         | carboxysome shell protein CsoS1                                        |
| PM00550 | 2 | 2.93      | 0.71 | 0.50 | 0.00 CO2 fixation                                         | Ribulose biphosphate carboxylase, large chain                          |
| PM00551 | 2 | 1.86      | 1.72 | 1.22 | 0.00 CO2 fixation                                         | Ribulose biphosphate carboxylase, small chain                          |
| PM00552 | 2 | -1.05     | 2.29 | 1.62 | 1.00 CO2 fixation                                         | carboxysome shell protein CsoS2                                        |
| PM00554 | 2 | -0.64     | 0.36 | 0.26 | 1.00 CO2 fixation                                         | putative carboxysome peptide A                                         |
| PM00555 | 2 | -0.32     | 0.20 | 0.14 | 1.00 CO2 fixation                                         | putative carboxysome peptide B                                         |
| PM00556 | 2 | -1.59     | 1.24 | 0.88 | 0.48 Conserved hypothetical protein                       | conserved hypothetical protein                                         |
| PM00557 | 2 | 0.88      | 0.05 | 0.04 | 1.00 Conserved hypothetical protein                       | conserved hypothetical                                                 |
| PM00558 | 2 | -0.80     | 0.80 | 0.57 | 1.00 Conserved hypothetical protein                       | conserved hypothetical protein                                         |
| PM00560 | 2 | -1.12     | 0.36 | 0.26 | 1.00 Other                                                | possible ATP phosphoribosyltransferase                                 |
| PM00561 | 2 | -0.21     | 1.15 | 0.81 | 1.00 Transport and binding proteins                       | putative multidrug efflux ABC transporter                              |
| PM00564 | 2 | -1.09     | 0.33 | 0.24 | 0.58 Conserved hypothetical protein                       | conserved hypothetical protein                                         |
| PM00565 | 2 | 0.16      | 0.32 | 0.23 | 1.00 DNA replication, recombination, and repair           | chromosomal replication initiator protein DnaA                         |
| PM00570 | 2 | -1.18     | 0.46 | 0.32 | 0.50 NADH dehydrogenase                                   | NADH dehydrogenase subunit NdhI (ndhI)                                 |
| PM00571 | 2 | #NAME? NA | NA   |      | 1.00 Conserved hypothetical protein                       | conserved hypothetical protein                                         |
| PM00573 | 2 | 2.99      | 0.41 | 0.29 | 0.00 Conserved hypothetical protein                       | conserved hypothetical protein                                         |
| PM00574 | 2 | #NAME? NA | NA   |      | 0.29 Conserved hypothetical protein                       | conserved hypothetical protein                                         |
| PM00577 | 2 | -1.40     | 0.87 | 0.61 | 1.00 RNA synthesis, modification, and DNA transcription   | Putative type II alternative sigma factor, sigma70 family              |
| PM00579 | 2 | -1.89     | 0.88 | 0.62 | 0.12 Conserved hypothetical protein                       | conserved hypothetical protein                                         |
| PM00580 | 2 | -0.33     | 0.11 | 0.08 | 1.00 Degradation of proteins, peptides, and glycopeptides | ATP-dependent Clp protease, Hsp 100, ATP-binding subunit ClpB          |
| PM00581 | 2 | -0.43     | 0.95 | 0.67 | 1.00 Soluble electron carriers                            | plastocyanin                                                           |
| PM00583 | 2 | -1.02     | 1.16 | 0.82 | 1.00 Cobalamin, heme, phycobilin and porphyrin            | Uroporphyrinogen decarboxylase (URO-D)                                 |
| PM00586 | 2 | -0.20     | 0.13 | 0.09 | 1.00 Conserved hypothetical protein                       | conserved hypothetical                                                 |
| PM00593 | 2 | -1.49     | 0.36 | 0.26 | 1.00 Other                                                | Peptidase family M3                                                    |
| PM00594 | 2 | -1.20     | 0.37 | 0.26 | 0.57 NADH dehydrogenase                                   | putative NADH Dehydrogenase (complex I) subunit (chain 4)              |
| PM00595 | 2 | -0.06     | 0.60 | 0.42 | 1.00 Aspartate family                                     | Homoserine kinase:GHMP kinases putative ATP-binding domain             |
| PM00599 | 2 | -1.12     | 1.39 | 0.98 | 1.00 Conserved hypothetical protein                       | conserved hypothetical protein                                         |
| PM00601 | 2 | -0.09     | 0.45 | 0.29 | 1.00 Transport and binding proteins                       | ABC transporter, substrate binding protein, possibly Mn                |
| PM00603 | 2 | -1.31     | 0.65 | 0.46 | 0.37 Transport and binding proteins                       | ABC transporter component, possibly Mn transport                       |
| PM00605 | 2 | -0.24     | 0.47 | 0.33 | 1.00 Conserved hypothetical protein                       | conserved hypothetical protein                                         |
| PM00609 | 2 | -0.43     | 0.29 | 0.21 | 1.00 Polysaccharides and glycoproteins                    | Putative ADPglucose-glucosyltransferase (GlgA)                         |
| PM00613 | 2 | -0.38     | 0.07 | 0.05 | 1.00 Aromatic amino acid family                           | EPSP synthase (3-phosphoshikimate 1-carboxyvinyltransferase)           |
| PM00614 | 2 | 1.24      | 1.07 | 0.76 | 0.48 Conserved hypothetical protein                       | conserved hypothetical protein                                         |
| PM00615 | 2 | -0.46     | 0.25 | 0.18 | 1.00 Other                                                | Possible nitrilase                                                     |
| PM00618 | 2 | -0.15     | 1.43 | 1.01 | 1.00 Carotenoid                                           | polyprenyl synthetase; solanesyl diphosphate synthase (sds)            |
| PM00619 | 2 | 0.75      | 0.01 | 0.01 | 1.00 Pyruvate and acetyl-CoA metabolism                   | acetyl-coenzyme A synthetase                                           |
| PM00622 | 2 | 0.05      | 0.29 | 0.21 | 1.00 Conserved hypothetical protein                       | conserved hypothetical protein                                         |
| PM00626 | 2 | -0.75     | 0.59 | 0.42 | 0.81 Conserved hypothetical protein                       | hypothetical                                                           |
| PM00627 | 2 | -1.44     | 0.28 | 0.20 | 1.00 Photosystem II                                       | light-harvesting complex protein                                       |
| PM00628 | 2 | -1.07     | 1.77 | 1.25 | 0.52 Transport and binding proteins                       | possible sodium:solute symporter, ESS family                           |
| PM00629 | 2 | -0.74     | 0.14 | 0.10 | 1.00 Conserved hypothetical protein                       | conserved hypothetical protein                                         |
| PM00633 | 2 | -0.88     | 0.40 | 0.28 | 1.00 Carotenoid                                           | putativeycopene epsilon cyclase                                        |
| PM00637 | 2 | 1.08      | 0.57 | 0.40 | 0.64 Regulatory functions                                 | Ferric uptake regulator family                                         |
| PM00638 | 2 | 0.40      | 0.14 | 0.10 | 0.90 Conserved hypothetical protein                       | conserved hypothetical protein                                         |
| PM00641 | 2 | -1.81     | 0.05 | 0.04 | 0.36 Conserved hypothetical protein                       | conserved hypothetical protein                                         |
| PM00642 | 2 | 3.31      | 0.02 | 0.01 | 0.00 Serine family / Sulfur assimilation                  | putative O-Acetyl homoserine sulfhydrylase                             |
| PM00647 | 2 | -0.64     | 0.86 | 0.61 | 1.00 Conserved hypothetical protein                       | conserved hypothetical protein                                         |
| PM00649 | 2 | 1.82      | 0.82 | 0.58 | 0.10 Other                                                | Pentapeptide repeats                                                   |
| PM00651 | 2 | -1.09     | 1.17 | 0.82 | 0.51 Regulatory functions                                 | possible VHS domain                                                    |
| PM00652 | 2 | -1.08     | 0.03 | 0.02 | 0.57 RNA synthesis, modification, and DNA transcription   | possible 5'-3' exonuclease, C-terminal SAM fol                         |
| PM00658 | 2 | -0.70     | 0.46 | 0.33 | 0.84 Aminoacyl tRNA synthetases and tRNA modification     | putative pseudouridylyate synthase specific to ribosomal small subunit |
| PM00659 | 2 | -0.45     | 0.25 | 0.18 | 1.00 DNA replication, recombination, and repair           | NAD-dependent DNA ligase N-terminus                                    |
| PM00660 | 2 | 2.39      | 0.22 | 0.15 | 0.00 Degradation of RNA                                   | possible RNA recognition motif. (a.k.a. RRM, R                         |
| PM00661 | 2 | 0.72      | 0.26 | 0.18 | 1.00 Purine ribonucleotide biosynthesis                   | ribonucleotide reductase (Class II)                                    |
| PM00664 | 2 | -0.84     | 1.52 | 1.08 | 1.00 Conserved hypothetical protein                       | conserved hypothetical protein                                         |
| PM00665 | 2 | -1.87     | 0.53 | 0.38 | 0.08 Other                                                | Hsp33 protein                                                          |
| PM00667 | 2 | -2.07     | 1.49 | 1.06 | 0.00 Conserved hypothetical protein                       | conserved hypothetical protein                                         |
| PM00674 | 2 | -1.06     | 1.17 | 0.83 | 1.00 Aspartate family                                     | Aminotransferases class I                                              |
| PM00681 | 2 | -1.28     | 1.88 | 1.33 | 0.11 Conserved hypothetical protein                       | conserved hypothetical protein                                         |
| PM00683 | 2 | -1.47     | 0.85 | 0.60 | 0.17 Purine ribonucleotide biosynthesis                   | phosphoribosylaminoimidazole carboxylase                               |
| PM00684 | 2 | -1.08     | 0.29 | 0.20 | 1.00 Regulatory functions                                 | possible Zinc finger, C2H2 type                                        |

|         |   |           |      |      |      |                                                       |                                                                                |
|---------|---|-----------|------|------|------|-------------------------------------------------------|--------------------------------------------------------------------------------|
| PM00685 | 2 | -0.90     | 0.32 | 0.22 | 1.00 | Conserved hypothetical protein                        | hypothetical protein                                                           |
| PM00687 | 2 | -2.33     | 0.94 | 0.66 | 0.00 | Conserved hypothetical protein                        | conserved hypothetical                                                         |
| PM00688 | 2 | 0.97      | 1.18 | 0.83 | 1.00 | Protein modification and translation factors          | possible Elongation factor Tu domain 2                                         |
| PM00689 | 2 | -1.52     | 0.92 | 0.65 | 0.52 | Adaptations and atypical conditions                   | possible high light inducible protein                                          |
| PM00690 | 2 | -0.89     | 0.16 | 0.11 | 1.00 | Adaptations and atypical conditions                   | possible high light inducible protein                                          |
| PM00691 | 2 | 0.68      | 0.96 | 0.68 | 0.79 | Conserved hypothetical protein                        | conserved hypothetical protein                                                 |
| PM00692 | 2 | 0.70      | 0.32 | 0.23 | 0.70 | Regulatory functions                                  | possible BDT domain                                                            |
| PM00693 | 2 | -1.44     | 1.61 | 1.14 | 0.50 | Other                                                 | possible Hepatitis C virus envelope glycoprotein                               |
| PM00697 | 2 | 1.36      | 0.11 | 0.08 | 0.43 | DNA replication, recombination, and repair            | possible D12 class N6 adenine-specific DNA met                                 |
| PM00698 | 2 | -1.21     | 1.52 | 1.07 | 0.27 | Chaperones                                            | possible DnaJ central domain (4 repeats)                                       |
| PM00699 | 2 | -1.51     | 1.63 | 1.15 | 0.76 | Conserved hypothetical protein                        | conserved hypothetical                                                         |
| PM00700 | 2 | #NAME? NA | NA   |      | 1.00 | Conserved hypothetical protein                        | conserved hypothetical protein                                                 |
| PM00703 | 2 | -0.56     | 0.52 | 0.37 | 0.88 | Conserved hypothetical protein                        | conserved hypothetical protein                                                 |
| PM00704 | 2 | -1.42     | 0.46 | 0.32 | 0.26 | Regulatory functions                                  | putative potassium channel, VIC family                                         |
| PM00705 | 2 | -2.06     | 0.68 | 0.48 | 0.01 | Regulatory functions                                  | two-component response regulator, phosphate                                    |
| PM00707 | 2 | -0.48     | 0.10 | 0.07 | 0.94 | Other                                                 | possible Lipoprotein                                                           |
| PM00708 | 2 | -0.37     | 0.03 | 0.02 | 1.00 | Regulatory functions                                  | putative secreted protein                                                      |
| PM00709 | 2 | -0.96     | 0.41 | 0.29 | 1.00 | Membranes, lipoproteins and porins                    | possible porin                                                                 |
| PM00710 | 2 | -1.32     | 0.11 | 0.08 | 1.00 | Transport and binding proteins                        | ABC transporter, substrate binding protein, phosphate                          |
| PM00714 | 2 | 0.35      | 1.34 | 0.95 | 0.97 | Regulatory functions                                  | Bacterial regulatory proteins, ArsR family                                     |
| PM00717 | 2 | -1.66     | 0.04 | 0.03 | 0.19 | Conserved hypothetical protein                        | conserved hypothetical protein                                                 |
| PM00719 | 2 | #NAME? NA | NA   |      | 1.00 | Conserved hypothetical protein                        | hypothetical                                                                   |
| PM00722 | 2 | 4.32      | 2.69 | 1.90 | 0.00 | Conserved hypothetical protein                        | hypothetical                                                                   |
| PM00725 | 2 | 0.47      | 0.40 | 0.28 | 1.00 | Transport and binding proteins                        | putative phosphate ABC transporter, ATP binding subunit                        |
| PM00726 | 2 | 2.81      | 0.94 | 0.67 | 0.00 | Conserved hypothetical protein                        | hypothetical                                                                   |
| PM00732 | 2 | -0.99     | 1.75 | 1.24 | 0.34 | Other                                                 | possible Major surface glycoprotein                                            |
| PM00736 | 2 | 0.51      | 1.20 | 0.85 | 0.99 | Other                                                 | possible Alpha-2-macroglobulin family N-termin                                 |
| PM00739 | 2 | -2.15     | 0.56 | 0.40 | 0.00 | Conserved hypothetical protein                        | conserved hypothetical protein                                                 |
| PM00740 | 2 | -1.80     | 0.21 | 0.15 | 0.23 | Cytochrome b6/f complex                               | Cytochrome b6-f complex subunit VIII                                           |
| PM00741 | 2 | -0.99     | 0.66 | 0.47 | 0.72 | Conserved hypothetical protein                        | conserved hypothetical protein                                                 |
| PM00742 | 2 | 0.85      | 1.12 | 0.79 | 1.00 | Degradation of proteins, peptides, and glycopeptides  | Cip protease subunit                                                           |
| PM00743 | 2 | 0.40      | 0.20 | 0.14 | 1.00 | Cell division                                         | FtsH ATP-dependent protease homolog                                            |
| PM00744 | 2 | -0.87     | 0.76 | 0.53 | 1.00 | Conserved hypothetical protein                        | conserved hypothetical protein                                                 |
| PM00747 | 2 | -0.93     | 1.32 | 0.93 | 0.44 | Cobalamin, heme, phycobilin and porphyrin             | ferredoxin-dependent biliverdin reductase                                      |
| PM00751 | 2 | -1.17     | 0.04 | 0.03 | 0.61 | Conserved hypothetical protein                        | conserved hypothetical protein                                                 |
| PM00753 | 2 | 1.85      | 0.76 | 0.54 | 1.00 | Ribosomal proteins                                    | 30S ribosomal protein S2                                                       |
| PM00754 | 2 | 0.70      | 1.58 | 1.11 | 1.00 | Protein modification and translation factors          | putative Elongation factor Ts                                                  |
| PM00758 | 2 | 1.80      | 1.11 | 0.79 | 0.32 | Serine family / Sulfur assimilation                   | Ferredoxin-sulfite reductase                                                   |
| PM00760 | 2 | 1.81      | 0.38 | 0.27 | 0.24 | Cobalamin, heme, phycobilin and porphyrin             | Aromatic-ring hydroxylase (flavoprotein monooxygenase)                         |
| PM00762 | 2 | -1.43     | 1.01 | 0.71 | 0.44 | Aromatic amino acid family                            | tyrosine binding protein                                                       |
| PM00766 | 2 | -0.55     | 1.21 | 0.86 | 1.00 | Other                                                 | Ribulose-phosphate 3-epimerase                                                 |
| PM00767 | 2 | -0.11     | 0.71 | 0.50 | 1.00 | Surface polysaccharides, lipopolysaccharides and anti | Fructose-1,6-bisphosphatase/sedoheptulose-1,7-bis phosphatase                  |
| PM00769 | 2 | -0.65     | 0.27 | 0.19 | 1.00 | Other                                                 | ADP-glucose pyrophosphorylase                                                  |
| PM00770 | 2 | -0.84     | 0.54 | 0.38 | 0.61 | Pentose phosphate pathway                             | 6-phosphogluconate dehydrogenase                                               |
| PM00772 | 2 | -2.57     | 1.67 | 1.18 | 0.27 | Conserved hypothetical protein                        | conserved hypothetical protein                                                 |
| PM00774 | 2 | -0.81     | 0.17 | 0.12 | 1.00 | Branched chain family                                 | Dihydroxy-acid dehydratase                                                     |
| PM00775 | 2 | 2.18      | 1.15 | 0.82 | 0.01 | Conserved hypothetical protein                        | conserved hypothetical                                                         |
| PM00777 | 2 | -0.38     | 0.11 | 0.08 | 1.00 | Conserved hypothetical protein                        | conserved hypothetical protein                                                 |
| PM00779 | 2 | 4.48      | 0.76 | 0.54 | 0.00 | Conserved hypothetical protein                        | conserved hypothetical protein                                                 |
| PM00781 | 2 | 1.48      | 1.14 | 0.81 | 1.00 | Fatty acid, phospholipid and sterol metabolism        | Fructose-bisphosphate/sedoheptulose-1,7-bisphosph ate aldolase                 |
| PM00784 | 2 | 1.28      | 0.83 | 0.58 | 0.50 | Fatty acid, phospholipid and sterol metabolism        | acetyl-CoA carboxylase, beta subunit                                           |
| PM00785 | 2 | 0.36      | 1.07 | 0.76 | 1.00 | CO2 fixation                                          | phosphoribulokinase                                                            |
| PM00790 | 2 | 0.28      | 0.19 | 0.13 | 1.00 | Conserved hypothetical protein                        | conserved hypothetical protein                                                 |
| PM00794 | 2 | -0.66     | 0.49 | 0.35 | 0.78 | Conserved hypothetical protein                        | conserved hypothetical protein                                                 |
| PM00797 | 2 | -2.00     | 1.07 | 0.76 | 0.19 | Nucleoproteins                                        | possible mRNA binding protein                                                  |
| PM00799 | 2 | -0.15     | 0.25 | 0.17 | 1.00 | Conserved hypothetical protein                        | conserved hypothetical protein                                                 |
| PM00800 | 2 | -0.81     | 0.55 | 0.39 | 0.76 | Conserved hypothetical protein                        | conserved hypothetical protein                                                 |
| PM00801 | 2 | -1.32     | 0.67 | 0.47 | 0.48 | Conserved hypothetical protein                        | conserved hypothetical protein                                                 |
| PM00802 | 2 | -1.54     | 0.60 | 0.42 | 0.16 | DNA replication, recombination, and repair            | putative endonuclease                                                          |
| PM00804 | 2 | -1.16     | 0.79 | 0.56 | 1.00 | Other                                                 | ferritin                                                                       |
| PM00806 | 2 | -0.53     | 0.27 | 0.19 | 0.90 | Regulatory functions                                  | Bacterial regulatory proteins, Crp family                                      |
| PM00810 | 2 | 0.40      | 0.93 | 0.66 | 1.00 | Conserved hypothetical protein                        | hypothetical                                                                   |
| PM00812 | 2 | #NAME? NA | NA   |      | 1.00 | Conserved hypothetical protein                        | hypothetical                                                                   |
| PM00814 | 2 | -1.29     | 0.10 | 0.07 | 0.49 | Other                                                 | possible Cytochrome oxidase c subunit Vlb                                      |
| PM00815 | 2 | -1.14     | 0.95 | 0.67 | 0.17 | Adaptations and atypical conditions                   | possible high light inducible protein                                          |
| PM00816 | 2 | -0.16     | 0.29 | 0.20 | 1.00 | Adaptations and atypical conditions                   | possible high light inducible protein                                          |
| PM00817 | 2 | -0.02     | 0.04 | 0.03 | 0.75 | Adaptations and atypical conditions                   | possible high light inducible protein                                          |
| PM00818 | 2 | -0.96     | 0.22 | 0.16 | 0.51 | Adaptations and atypical conditions                   | possible high light inducible protein                                          |
| PM00819 | 2 | 0.45      | 0.69 | 0.49 | 1.00 | Conserved hypothetical protein                        | hypothetical                                                                   |
| PM00820 | 2 | -0.46     | 0.81 | 0.57 | 0.93 | Aromatic amino acid family                            | possible EPSP synthase (3-phosphoshikimate 1-c                                 |
| PM00821 | 2 | -0.97     | 0.52 | 0.37 | 0.67 | Conserved hypothetical protein                        | conserved hypothetical protein                                                 |
| PM00824 | 2 | 0.49      | 0.23 | 0.16 | 1.00 | Conserved hypothetical protein                        | conserved hypothetical protein                                                 |
| PM00828 | 2 | -1.48     | 1.04 | 0.73 | 0.17 | Other                                                 | S4 domain                                                                      |
| PM00829 | 2 | -0.94     | 1.64 | 1.16 | 1.00 | Other                                                 | Triosephosphate isomerase                                                      |
| PM00835 | 2 | -0.15     | 1.30 | 0.92 | 1.00 | Conserved hypothetical protein                        | conserved hypothetical protein                                                 |
| PM00844 | 2 | 0.83      | 0.03 | 0.02 | 1.00 | Adaptations and atypical conditions                   | phytochrome-regulated gene                                                     |
| PM00845 | 2 | -0.04     | 0.21 | 0.15 | 1.00 | Conserved hypothetical protein                        | conserved hypothetical protein                                                 |
| PM00846 | 2 | -0.61     | 0.39 | 0.28 | 0.84 | Other                                                 | possible Uncharacterized secreted proteins, Ya                                 |
| PM00847 | 2 | -0.02     | 0.11 | 0.08 | 1.00 | Drug and analog sensitivity                           | putative acetazolamide conferring resistance protein Zam                       |
| PM00851 | 2 | -0.48     | 1.08 | 0.76 | 1.00 | Other                                                 | Putative CbbY homolog                                                          |
| PM00852 | 2 | -2.78     | 1.24 | 0.88 | 0.01 | Conserved hypothetical protein                        | conserved hypothetical protein                                                 |
| PM00853 | 2 | -2.38     | 0.79 | 0.56 | 0.13 | Ribosomal proteins                                    | 50S ribosomal protein L32                                                      |
| PM00856 | 2 | -1.93     | 0.74 | 0.52 | 1.00 | Detoxification                                        | thioredoxin peroxidase                                                         |
| PM00857 | 2 | -1.58     | 0.99 | 0.70 | 0.48 | Other                                                 | possible Influenza RNA-dependent RNA polymeras                                 |
| PM00858 | 2 | -1.20     | 1.13 | 0.80 | 0.44 | Conserved hypothetical protein                        | hypothetical                                                                   |
| PM00861 | 2 | -1.70     | 0.53 | 0.38 | 1.00 | Transport and binding proteins                        | possible Virion host shutoff protein                                           |
| PM00863 | 2 | -1.68     | 1.79 | 1.27 | 0.10 | Cobalamin, heme, phycobilin and porphyrin             | putative cobinamide kinase                                                     |
| PM00864 | 2 | -0.94     | 0.56 | 0.39 | 1.00 | Other                                                 | possible Fusion glycoprotein F0.                                               |
| PM00867 | 2 | -1.25     | 0.23 | 0.16 | 0.47 | Aminoacyl tRNA synthetases and tRNA modification      | Methionyl-tRNA synthetase                                                      |
| PM00869 | 2 | -1.63     | 0.92 | 0.65 | 0.33 | Ribosomal proteins                                    | 30S Ribosomal protein S18                                                      |
| PM00870 | 2 | -1.44     | 0.87 | 0.61 | 1.00 | Ribosomal proteins                                    | 50S Ribosomal protein L33                                                      |
| PM00872 | 2 | -1.69     | 0.23 | 0.17 | 1.00 | Other                                                 | possible Carboxylesterase                                                      |
| PM00876 | 2 | 0.00      | 0.48 | 0.34 | 1.00 | Conserved hypothetical protein                        | conserved hypothetical                                                         |
| PM00878 | 2 | -0.02     | 1.05 | 0.74 | 1.00 | Branched-chain family                                 | putative Branched-chain amino acid aminotransferase                            |
| PM00881 | 2 | -0.54     | 0.85 | 0.60 | 1.00 | Conserved hypothetical protein                        | conserved hypothetical protein                                                 |
| PM00883 | 2 | -2.42     | 0.58 | 0.41 | 0.18 | Conserved hypothetical protein                        | conserved hypothetical protein                                                 |
| PM00889 | 2 | -1.60     | 1.27 | 0.90 | 0.56 | Riboflavin                                            | possible GTP cyclohydrolase II / 3,4-dihydroxy-2-butanone 4-phosphate synthase |
| PM00894 | 2 | -0.34     | 0.56 | 0.40 | 1.00 | Protein modification and translation factors          | Cyclophilin-type peptidyl-prolyl cis-trans isomerase                           |
| PM00895 | 2 | 0.52      | 1.38 | 0.98 | 0.89 | Conserved hypothetical protein                        | conserved hypothetical protein                                                 |
| PM00896 | 2 | -0.59     | 0.34 | 0.24 | 0.85 | Chaperones                                            | DnaJ2 protein                                                                  |
| PM00897 | 2 | -0.04     | 0.08 | 0.06 | 1.00 | Chaperones                                            | Molecular chaperone DnaK, heat shock protein hsp70                             |
| PM00898 | 2 | -1.32     | 0.45 | 0.32 | 0.29 | Soluble electron carriers                             | ferredoxin, petF-like protein                                                  |
| PM00899 | 2 | 0.42      | 0.79 | 0.56 | 1.00 | Regulatory functions                                  | Possible myo-inositol-1(or 4)-monophosphatase                                  |
| PM00901 | 2 | -1.45     | 0.51 | 0.36 | 1.00 | Chaperones                                            | heat shock protein Htpg                                                        |
| PM00902 | 2 | 0.09      | 0.02 | 0.01 | 1.00 | Ribosomal proteins                                    | 50S ribosomal protein L28                                                      |
| PM00906 | 2 | 2.51      | 0.96 | 0.68 | 0.10 | Photosystem I                                         | Photosystem I PsaK protein (subunit X)                                         |
| PM00907 | 2 | 0.74      | 0.35 | 0.25 | 1.00 | Sugars                                                | 1-deoxy-D-xylulose 5-phosphate synthase                                        |
| PM00910 | 2 | 1.33      | 0.27 | 0.19 | 0.31 | Conserved hypothetical protein                        | conserved hypothetical membrane protein                                        |
| PM00912 | 2 | -1.41     | 0.60 | 0.43 | 0.48 | Other                                                 | Pyruvate kinase                                                                |
| PM00913 | 2 | -1.46     | 0.22 | 0.16 | 0.27 | Transport and binding proteins                        | possible ABC transporter                                                       |
| PM00919 | 2 | -0.31     | 0.54 | 0.38 | 1.00 | Branched chain family                                 | serine-pyruvate/alanine:glyoxylate aminotransferase                            |
| PM00920 | 2 | 1.50      | 0.39 | 0.28 | 1.00 | Glutamate family / Nitrogen assimilation              | Glutamine synthetase, glutamate- $\alpha$ -ammonia ligase                      |
| PM00922 | 2 | -1.96     | 1.86 | 1.31 | 0.01 | Conserved hypothetical protein                        | conserved hypothetical protein                                                 |
| PM00923 | 2 | -0.66     | 0.31 | 0.22 | 1.00 | Conserved hypothetical protein                        | conserved hypothetical protein                                                 |
| PM00926 | 2 | 0.01      | 0.12 | 0.09 | 1.00 | Photosystem II                                        | possible Photosystem II reaction center Psb28 protein                          |

|          |   |           |      |      |                                |                                                      |                                                                                                        |
|----------|---|-----------|------|------|--------------------------------|------------------------------------------------------|--------------------------------------------------------------------------------------------------------|
| PMM0930  | 2 | 0.01      | 0.82 | 0.58 | 1.00                           | Other                                                | Pyruvate dehydrogenase E1 beta subunit                                                                 |
| PMM0934  | 2 | -0.53     | 0.48 | 0.34 | 0.90                           | Conserved hypothetical protein                       | conserved hypothetical protein                                                                         |
| PMM0936  | 2 | -0.20     | 0.55 | 0.39 | 1.00                           | DNA replication, recombination, and repair           | putative SOS mutagenesis protein UmuD                                                                  |
| PMM0941  | 2 | 1.43      | 0.99 | 0.70 | 1.00                           | Other                                                | possible cAMP phosphodiesterases class-II                                                              |
| PMM0942  | 2 | 1.31      | 0.56 | 0.40 | 1.00                           | DNA replication, recombination, and repair           | putative Holliday junction DNA helicase RuvA                                                           |
| PMM0943  | 2 | 0.68      | 0.34 | 0.24 | 1.00                           | Ribosomal proteins                                   | 30S Ribosomal protein S15                                                                              |
| PMM0946  | 2 | 0.33      | 0.91 | 0.64 | 1.00                           | Aminoacyl tRNA synthetases and tRNA modification     | Glutamyl-tRNA(Gln) amidotransferase A subunit                                                          |
| PMM0947  | 2 | -3.26     | 2.74 | 1.94 | 0.00                           | Conserved hypothetical protein                       | conserved hypothetical protein                                                                         |
| PMM0949  | 2 | -0.80     | 1.19 | 0.84 | 0.63                           | Conserved hypothetical protein                       | conserved hypothetical protein                                                                         |
| PMM0950  | 2 | -1.92     | 1.29 | 0.91 | 0.02                           | Other                                                | No Cyanobase Name                                                                                      |
| PMM0953  | 2 | 2.16      | 0.81 | 0.57 | 0.00                           | Conserved hypothetical protein                       | conserved hypothetical protein                                                                         |
| PMM0954  | 2 | -0.14     | 0.12 | 0.09 | 1.00                           | Transport and binding proteins                       | ABC transporter, multidrug efflux family                                                               |
| PMM0955  | 2 | -1.66     | 0.64 | 0.45 | 0.19                           | Protein modification and translation factors         | Peptide methionine sulfoxide reductase                                                                 |
| PMM0957  | 2 | -1.72     | 1.71 | 1.21 | 0.21                           | Regulatory functions                                 | possible GRAM domain                                                                                   |
| PMM0958  | 2 | -0.39     | 0.37 | 0.26 | 1.00                           | Conserved hypothetical protein                       | conserved hypothetical                                                                                 |
| PMM0963  | 2 | -0.08     | 0.18 | 0.13 | 1.00                           | Nitrogen metabolism                                  | Urease alpha subunit                                                                                   |
| PMM0964  | 2 | -1.82     | 0.09 | 0.06 | 0.10                           | Nitrogen metabolism                                  | Urease beta subunit                                                                                    |
| PMM0965  | 2 | -1.57     | 1.25 | 0.89 | 0.14                           | Nitrogen metabolism                                  | Urease gamma subunit                                                                                   |
| PMM0966  | 2 | -1.96     | 0.95 | 0.68 | 0.14                           | Nitrogen metabolism                                  | urease accessory protein UreD                                                                          |
| PMM0969  | 2 | -1.85     | 1.01 | 0.72 | 0.10                           | Nitrogen metabolism                                  | urease accessory protein UreG                                                                          |
| PMM0970  | 2 | 0.22      | 0.01 | 0.00 | 1.00                           | Transport and binding proteins                       | putative urea ABC transporter, substrate binding protein                                               |
| PMM0971  | 2 | -0.57     | 0.72 | 0.51 | 1.00                           | Transport and binding proteins                       | Putative urea ABC transporter                                                                          |
| PMM0974  | 2 | -0.89     | 1.31 | 0.92 | 0.72                           | Transport and binding proteins                       | Putative ATP-binding subunit of urea ABC transport system                                              |
| PMM0975  | 2 | 1.01      | 0.45 | 0.32 | 0.48                           | Conserved hypothetical protein                       | conserved hypothetical protein                                                                         |
| PMM0982  | 2 | -0.72     | 0.32 | 0.23 | 1.00                           | DNA replication, recombination, and repair           | HNH endonuclease:HNH nuclease                                                                          |
| PMM0983  | 2 | 0.84      | 0.32 | 0.23 | 0.86                           | Fatty acid, phospholipid and sterol metabolism       | possible ATP synthase protein 8                                                                        |
| PMM0987  | 2 | -2.06     | 0.58 | 0.41 | 0.16                           | Ribosomal proteins                                   | 30S Ribosomal protein S21                                                                              |
| PMM0988  | 2 | 0.99      | 1.31 | 0.93 | 1.00                           | Regulatory functions                                 | Helix-hairpin-helix DNA-binding motif class 1                                                          |
| PMM0993  | 2 | -1.63     | 1.71 | 1.21 | 0.55                           | Conserved hypothetical protein                       | conserved hypothetical protein                                                                         |
| PMM0996  | 2 | 0.20      | 1.00 | 0.71 | 1.00                           | Conserved hypothetical protein                       | conserved hypothetical protein                                                                         |
| PMM0997  | 2 | -1.83     | 0.39 | 0.28 | 0.25                           | Conserved hypothetical protein                       | possible Protein of unknown function DUF67                                                             |
| PMM0998  | 2 | -1.29     | 0.11 | 0.07 | 0.38                           | Conserved hypothetical protein                       | conserved hypothetical protein                                                                         |
| PMM0999  | 2 | 2.47      | 1.32 | 0.93 | 0.00                           | Conserved hypothetical protein                       | hypothetical                                                                                           |
| PMM1003  | 2 | -1.18     | 0.39 | 0.27 | 0.47                           | Photosystem II                                       | possible Photosystem II reaction centre N prot                                                         |
| PMM1005  | 2 | -0.71     | 0.59 | 0.42 | 1.00                           | Regulatory functions                                 | possible Legume lectins alpha domain                                                                   |
| PMM1008  | 2 | -0.79     | 0.53 | 0.38 | 0.77                           | Conserved hypothetical protein                       | hypothetical                                                                                           |
| PMM1011  | 2 | -1.53     | 0.55 | 0.39 | 0.21                           | Conserved hypothetical protein                       | hypothetical                                                                                           |
| PMM1011  | 2 | -1.53     | 0.55 | 0.39 | 0.21                           | Conserved hypothetical protein                       | hypothetical                                                                                           |
| PMM1011  | 2 | -1.53     | 0.55 | 0.39 | 0.21                           | Conserved hypothetical protein                       | hypothetical                                                                                           |
| PMM1015  | 2 | -0.55     | 0.26 | 0.19 | 1.00                           | Conserved hypothetical protein                       | conserved hypothetical protein                                                                         |
| PMM1026  | 2 | -2.15     | 0.89 | 0.63 | 0.05                           | Conserved hypothetical protein                       | conserved hypothetical protein                                                                         |
| PMM1028  | 2 | 0.76      | 0.49 | 0.35 | 0.99                           | Conserved hypothetical protein                       | conserved hypothetical                                                                                 |
| PMM102a  | 2 | 0.15      | 0.50 | 0.35 | 1.00                           | Other                                                | No Cyanobase Name                                                                                      |
| PMM1030  | 2 | 0.71      | 0.37 | 0.26 | 1.00                           | Regulatory functions                                 | Ferric uptake regulator family                                                                         |
| PMM1031  | 2 | -1.30     | 1.10 | 0.78 | 0.64                           | Transport and binding proteins                       | ABC transporter, ATP binding domain, possibly Mn transport                                             |
| PMM1032  | 2 | 0.36      | 0.41 | 0.29 | 0.92                           | Transport and binding proteins                       | ABC transporter, substrate binding protein, possibly Mn.                                               |
| PMM1033  | 2 | -0.62     | 0.51 | 0.36 | 1.00                           | Protein modification and translation factors         | Cobalamin synthesis protein/P47K                                                                       |
| PMM1037  | 1 | #NAME? NA | NA   | 0.00 | Conserved hypothetical protein | conserved hypothetical                               |                                                                                                        |
| PMM1039  | 2 | -0.78     | 1.67 | 1.18 | 0.61                           | Conserved hypothetical protein                       | conserved hypothetical protein                                                                         |
| PMM1042  | 2 | -1.18     | 0.32 | 0.23 | 1.00                           | Conserved hypothetical protein                       | conserved hypothetical protein                                                                         |
| PMM1045  | 2 | -0.53     | 0.46 | 0.32 | 0.96                           | Conserved hypothetical protein                       | conserved hypothetical                                                                                 |
| PMM1054  | 2 | -1.98     | 1.21 | 0.86 | 0.13                           | DNA replication, recombination, and repair           | Crossover junction endodeoxyribonuclease RuvC                                                          |
| PMM1055  | 2 | 0.06      | 0.72 | 0.51 | 1.00                           | Cobalamin, heme, phycobilin and porphyrin            | Protoporphyrin IX Magnesium chelatase, Chl subunit                                                     |
| PMM1058  | 2 | 2.37      | 1.14 | 0.81 | 0.03                           | Cytochrome b6/f complex                              | Cytochrome b6/f complex, subunit V                                                                     |
| PMM1060  | 2 | -0.88     | 0.37 | 0.26 | 1.00                           | Other                                                | Glutamine amidotransferase class-I                                                                     |
| PMM1061  | 2 | -1.73     | 0.74 | 0.52 | 1.00                           | Thiamine                                             | Thioredoxin                                                                                            |
| PMM1063  | 2 | 1.60      | 2.09 | 1.48 | 1.00                           | DNA replication, recombination, and repair           | DNA gyrase/topoisomerase IV, subunit A                                                                 |
| PMM1066  | 2 | 0.54      | 0.46 | 0.33 | 1.00                           | Branched chain family                                | 2-isopropylmalate synthase                                                                             |
| PMM1067  | 2 | 0.17      | 0.46 | 0.32 | 1.00                           | WD repeat proteins                                   | possible Adenoviral fiber protein (repeat/shaf                                                         |
| PMM1069  | 2 | -0.80     | 0.88 | 0.62 | 0.87                           | Folic acid                                           | putative bifunctional Methylenetetrahydrofolate dehydrogenase Methenyltetrahydrofolate/cyclohydrolyase |
| PMM1074  | 2 | -1.23     | 0.36 | 0.25 | 0.52                           | Other                                                | Glucose-6-phosphate dehydrogenase                                                                      |
| PMM1075  | 2 | 0.59      | 0.03 | 0.02 | 1.00                           | Cytochrome b6/f complex                              | ferredoxin-NADP oxidoreductase (FNR)                                                                   |
| PMM1077  | 2 | -1.64     | 0.68 | 0.48 | 1.00                           | Regulatory functions                                 | two-component sensor histidine kinase                                                                  |
| PMM1078  | 2 | -0.03     | 0.17 | 0.12 | 1.00                           | Conserved hypothetical protein                       | conserved hypothetical                                                                                 |
| PMM1079  | 2 | -2.09     | 1.38 | 0.98 | 0.08                           | Regulatory functions                                 | possible Villin headpiece domain                                                                       |
| PMM1080  | 2 | 2.63      | 1.15 | 0.82 | 0.00                           | Other                                                | Ribose-phosphate pyrophosphokinase                                                                     |
| PMM1086  | 2 | -1.47     | 0.11 | 0.08 | 0.25                           | Fatty acid, phospholipid and sterol metabolism       | Alpha/beta hydrolase fold:Esterase/lipase/thioesterase family...                                       |
| PMM1088  | 2 | 1.49      | 0.30 | 0.21 | 1.00                           | Degradation of proteins, peptides, and glycopeptides | CipC                                                                                                   |
| PMM1090  | 2 | -1.38     | 0.59 | 0.42 | 0.54                           | Branched chain family                                | Diaminopimelate decarboxylase                                                                          |
| PMM1091  | 2 | -1.20     | 1.13 | 0.80 | 0.47                           | Conserved hypothetical protein                       | conserved hypothetical protein                                                                         |
| PMM1092  | 2 | -0.89     | 0.63 | 0.44 | 0.88                           | Other                                                | Undecaprenyl pyrophosphate synthetase (UPPS)                                                           |
| PMM1098  | 2 | -1.97     | 1.56 | 1.10 | 0.38                           | Photosystem II                                       | photosystem II oxygen evolving complex protein PsbP                                                    |
| PMM1107  | 2 | -1.11     | 0.38 | 0.27 | 0.78                           | Pyridoxine                                           | Pyridoxal phosphate biosynthetic protein PdxJ                                                          |
| PMM1109  | 2 | 0.96      | 0.74 | 0.52 | 0.41                           | Conserved hypothetical protein                       | conserved hypothetical protein                                                                         |
| PMM1111  | 2 | 2.26      | 1.84 | 1.30 | 0.01                           | Other                                                | Glutaredoxin-related protein                                                                           |
| PMM1113  | 2 | 1.89      | 0.17 | 0.12 | 0.28                           | Regulatory functions                                 | two-component response regulator                                                                       |
| PMM1116  | 2 | 2.02      | 0.47 | 0.33 | 1.00                           | Cell division                                        | NAD binding site:Glucose inhibited division protein A family                                           |
| PMM1117  | 2 | 2.03      | 0.48 | 0.34 | 0.13                           | Photosystem II                                       | possible Photosystem II reaction centre Y protein (PsbY)                                               |
| PMM1118  | 2 | -1.83     | 0.61 | 0.43 | 1.00                           | Adaptations and atypical conditions                  | possible high light inducible protein                                                                  |
| PMM1119  | 2 | -1.73     | 0.31 | 0.22 | 1.00                           | Membranes, lipoproteins and porins                   | possible porin                                                                                         |
| PMM1121  | 2 | -1.65     | 0.18 | 0.12 | 1.00                           | Membranes, lipoproteins and porins                   | possible porin                                                                                         |
| PMM1123  | 2 | 1.20      | 0.73 | 0.51 | 1.00                           | Hydrogenase                                          | putative Hydrogenase accessory protein                                                                 |
| PMM1124  | 2 | 0.11      | 1.04 | 0.74 | 1.00                           | Other                                                | possible Natural resistance-associated macroph                                                         |
| PMM1125  | 2 | #NAME? NA | NA   | 0.05 | Regulatory functions           | possible Bacterial regulatory proteins, deoR f       |                                                                                                        |
| PMM1128  | 2 | 0.57      | 0.62 | 0.44 | 1.00                           | Adaptations and atypical conditions                  | possible high light inducible protein                                                                  |
| PMM1129  | 2 | -1.75     | 0.25 | 0.18 | 0.19                           | Regulatory functions                                 | possible Notch (DSL) domain                                                                            |
| PMM1131  | 2 | 0.28      | 0.52 | 0.37 | 1.00                           | Conserved hypothetical protein                       | conserved hypothetical protein                                                                         |
| PMM1132  | 2 | -1.65     | 1.07 | 0.76 | 0.40                           | Conserved hypothetical protein                       | conserved hypothetical protein                                                                         |
| PMM1133  | 2 | -0.81     | 0.84 | 0.59 | 0.74                           | Conserved hypothetical protein                       | conserved hypothetical protein                                                                         |
| PMM1134  | 2 | 2.16      | 0.42 | 0.29 | 0.01                           | Other                                                | possible Phosphatidylinositol-specific phospho                                                         |
| PMM1135  | 2 | -2.08     | 0.37 | 0.27 | 0.15                           | Adaptations and atypical conditions                  | possible high light inducible protein                                                                  |
| PMM1138  | 2 | -0.54     | 0.70 | 0.49 | 0.80                           | Regulatory functions                                 | probable GTP-binding protein                                                                           |
| PMM1139  | 2 | #NAME? NA | NA   | 0.40 | Drug and analog sensitivity    | possible membrane fusion protein                     |                                                                                                        |
| PMM1145  | 2 | 0.65      | 1.25 | 0.88 | 0.86                           | Respiration                                          | putative nicotinamide nucleotide transhydrogenase, subunit beta                                        |
| PMM1146  | 2 | 3.88      | 0.96 | 0.68 | 0.00                           | Nicotinate and nicotinamide                          | putative nicotinamide nucleotide transhydrogenase, subunit alpha 2 (A2)                                |
| PMM1147  | 2 | -1.57     | 0.78 | 0.55 | 0.39                           | DNA replication, recombination, and repair           | putative nicotinamide nucleotide transhydrogenase, subunit alpha 1 (A1)                                |
| PMM1148  | 2 | 2.18      | 0.31 | 0.22 | 0.38                           | Protein modification and translation factors         | possible EF-1 guanine nucleotide exchange doma                                                         |
| PMM1149  | 2 | -1.25     | 0.59 | 0.42 | 1.00                           | Conserved hypothetical protein                       | conserved hypothetical                                                                                 |
| PMM1150  | 2 | 0.89      | 0.56 | 0.39 | 1.00                           | Regulatory functions                                 | putative thioredoxin reductase                                                                         |
| PMM1151  | 2 | 3.00      | 1.09 | 0.77 | 0.00                           | Protein modification and translation factors         | translation initiation factor IF-1                                                                     |
| PMM1152  | 2 | -1.20     | 0.29 | 0.20 | 1.00                           | Photosystem II                                       | putative chaperon-like protein for quinone binding in photosystem II                                   |
| PMM1152a | 2 | -1.48     | 0.06 | 0.04 | 1.00                           | Other                                                | No Cyanobase Name                                                                                      |
| PMM1154  | 2 | 1.04      | 0.80 | 0.57 | 1.00                           | Branched chain family                                | Acetolactate synthase small subunit                                                                    |
| PMM1156  | 2 | -2.19     | 0.17 | 0.12 | 0.01                           | Photosystem I                                        | photosystem I assembly related protein Ycf4                                                            |
| PMM1157  | 2 | -0.87     | 0.58 | 0.41 | 1.00                           | Photosystem II                                       | Photosystem II PsbD protein (D2)                                                                       |
| PMM1158  | 2 | -0.43     | 0.58 | 0.41 | 1.00                           | Photosystem II                                       | Photosystem II PsbC protein (CP43)                                                                     |
| PMM1165  | 2 | -0.92     | 0.14 | 0.10 | 0.65                           | Aminoacyl tRNA synthetases and tRNA modification     | Glycyl-tRNA synthetase alpha subunit                                                                   |
| PMM1167  | 2 | -0.87     | 2.69 | 1.90 | 0.85                           | Other                                                | Macrophage migration inhibitory factor family                                                          |
| PMM1168  | 2 | -1.90     | 0.87 | 0.62 | 0.25                           | Conserved hypothetical protein                       | conserved hypothetical protein                                                                         |
| PMM1169  | 2 | -1.33     | 0.50 | 0.35 | 0.53                           | Conserved hypothetical protein                       | hypothetical                                                                                           |
| PMM1170  | 2 | -1.13     | 0.99 | 0.70 | 0.61                           | Conserved hypothetical protein                       | conserved hypothetical protein                                                                         |
| PMM1171  | 2 | -0.30     | 0.90 | 0.64 | 1.00                           | Soluble electron carriers                            | Flavodoxin                                                                                             |
| PMM1174  | 2 | 0.84      | 0.25 | 0.17 | 0.65                           | Conserved hypothetical protein                       | hypothetical                                                                                           |
| PMM1176  | 2 | -0.32     | 0.11 | 0.08 | 1.00                           | Regulatory functions                                 | possible Helix-turn-helix protein, copG family                                                         |
| PMM1179  | 2 | -2.05     | 2.94 | 2.08 | 0.80                           | Regulatory functions                                 | putative SMR family transporter, possible pecM homologue                                               |
| PMM1180  | 2 | -0.06     | 0.48 | 0.34 | 1.00                           | Degradation of proteins, peptides, and glycopeptides | signal peptide peptidase SppA (protease IV)                                                            |
| PMM1183  | 2 | -0.72     | 1.00 | 0.71 | 1.00                           | Ribosomal proteins                                   | 50S ribosomal protein L34                                                                              |

|         |   |           |      |      |      |                                                       |                                                                                  |
|---------|---|-----------|------|------|------|-------------------------------------------------------|----------------------------------------------------------------------------------|
| PMM1184 | 2 | 0.40      | 0.62 | 0.44 | 0.98 | Degradation of RNA                                    | Bacterial ribonuclease P protein component                                       |
| PMM1185 | 2 | -0.85     | 0.48 | 0.34 | 1.00 | Conserved hypothetical protein                        | conserved hypothetical protein                                                   |
| PMM1186 | 2 | -0.79     | 0.38 | 0.27 | 1.00 | Regulatory functions                                  | Putative inner membrane protein; similar to 60 kDa inner membrane protein family |
| PMM1188 | 2 | -0.55     | 0.17 | 0.12 | 0.92 | Aminoacyl tRNA synthetases and tRNA modification      | Seryl-tRNA synthetase                                                            |
| PMM1190 | 2 | -0.98     | 0.13 | 0.09 | 1.00 | Ribosomal proteins                                    | 30S Ribosomal protein S14                                                        |
| PMM1191 | 2 | -0.24     | 1.07 | 0.76 | 1.00 | RNA synthesis, modification, and DNA transcription    | polyribonucleotide nucleotidyltransferase                                        |
| PMM1192 | 2 | -1.49     | 0.14 | 0.10 | 0.47 | Other                                                 | CysQ protein homolog                                                             |
| PMM1204 | 2 | 0.52      | 0.42 | 0.30 | 1.00 | Surface polysaccharides, lipopolysaccharides and anti | glucose-1-phosphate cytidyltransferase                                           |
| PMM1205 | 2 | -2.72     | 0.57 | 0.40 | 0.00 | Sugars                                                | NDP-hexose 3,4-dehydratase                                                       |
| PMM1229 | 2 | -0.52     | 1.38 | 0.98 | 1.00 | Respiration                                           | Dehydrogenase, E1 component                                                      |
| PMM1234 | 2 | 0.03      | 0.33 | 0.24 | 1.00 | Hydrogenase                                           | Zinc-containing alcohol dehydrogenase superfamily                                |
| PMM1235 | 2 | -0.44     | 0.21 | 0.15 | 0.90 | Transport and binding proteins                        | possible N-terminal fragment of transketolase                                    |
| PMM1240 | 2 | -1.47     | 1.27 | 0.90 | 0.84 | Other                                                 | methyltransferase                                                                |
| PMM1241 | 2 | -1.46     | 1.07 | 0.76 | 0.25 | Conserved hypothetical protein                        | hypothetical protein                                                             |
| PMM1244 | 2 | #NAME? NA | NA   |      | 1.00 | Conserved hypothetical protein                        | hypothetical protein                                                             |
| PMM1245 | 2 | -0.31     | 1.51 | 1.07 | 1.00 | Conserved hypothetical protein                        | conserved hypothetical protein                                                   |
| PMM1250 | 2 | -1.01     | 0.74 | 0.52 | 0.71 | Conserved hypothetical protein                        | conserved hypothetical protein                                                   |
| PMM1251 | 2 | -0.65     | 0.29 | 0.21 | 1.00 | Other                                                 | Carbamoyltransferase                                                             |
| PMM1252 | 2 | -0.91     | 0.57 | 0.40 | 0.58 | Other                                                 | possible acetyltransferase                                                       |
| PMM1257 | 2 | -1.57     | 0.47 | 0.33 | 0.23 | Surface polysaccharides, lipopolysaccharides and anti | possible dTDP-glucose 4,6-dehydratase                                            |
| PMM1258 | 2 | -0.75     | 0.72 | 0.51 | 1.00 | Pyridoxine                                            | pyridoxal-phosphate-dependent aminotransferase                                   |
| PMM1259 | 2 | 0.62      | 0.14 | 0.10 | 1.00 | Pyridoxine                                            | pyridoxal-phosphate-dependent aminotransferase                                   |
| PMM1260 | 2 | -0.86     | 0.43 | 0.30 | 1.00 | Transport and binding proteins                        | Nucleoside-diphosphate-sugar epimerase                                           |
| PMM1261 | 2 | -0.77     | 0.35 | 0.25 | 0.72 | Sugars                                                | UDP-glucose 6-dehydrogenase                                                      |
| PMM1262 | 2 | 2.37      | 0.51 | 0.36 | 0.02 | Regulatory functions                                  | SOS function regulatory protein, LexA repressor                                  |
| PMM1264 | 2 | 0.75      | 0.05 | 0.04 | 1.00 | Cell division                                         | cell division protein FtsH3                                                      |
| PMM1267 | 2 | -2.15     | 1.04 | 0.74 | 0.03 | Conserved hypothetical protein                        | conserved hypothetical                                                           |
| PMM1269 | 2 | -0.27     | 0.27 | 0.19 | 1.00 | Transport and binding proteins                        | predicted sugar kinase                                                           |
| PMM1270 | 2 | -0.40     | 0.22 | 0.16 | 1.00 | Aminoacyl tRNA synthetases and tRNA modification      | Phenylalanyl-tRNA synthetase alpha chain                                         |
| PMM1272 | 2 | 2.09      | 0.65 | 0.46 | 0.01 | Conserved hypothetical protein                        | conserved hypothetical protein                                                   |
| PMM1273 | 2 | -0.81     | 0.50 | 0.36 | 0.80 | Riboflavin                                            | putative riboflavin kinase/FAD synthase                                          |
| PMM1275 | 2 | -0.16     | 1.01 | 0.72 | 1.00 | Conserved hypothetical protein                        | DUF170                                                                           |
| PMM1276 | 2 | -1.18     | 0.90 | 0.64 | 1.00 | Conserved hypothetical protein                        | conserved hypothetical protein                                                   |
| PMM1277 | 2 | -1.70     | 0.96 | 0.68 | 0.10 | Conserved hypothetical protein                        | conserved hypothetical protein                                                   |
| PMM1283 | 2 | 0.33      | 0.55 | 0.39 | 1.00 | Conserved hypothetical protein                        | conserved hypothetical protein                                                   |
| PMM1284 | 2 | -0.72     | 0.85 | 0.60 | 0.89 | Adaptations and atypical conditions                   | PhoH-like phosphate starvation-inducible protein                                 |
| PMM1285 | 2 | -0.28     | 0.05 | 0.03 | 1.00 | Ribosomal proteins                                    | 30S Ribosomal protein S16                                                        |
| PMM1286 | 2 | -0.28     | 0.38 | 0.28 | 1.00 | Protein and peptide secretion                         | signal recognition particle protein (SRP54)                                      |
| PMM1287 | 2 | 0.36      | 0.22 | 0.15 | 1.00 | Conserved hypothetical protein                        | conserved hypothetical protein                                                   |
| PMM1288 | 2 | -0.84     | 0.39 | 0.28 | 1.00 | Other                                                 | Pyruvate dehydrogenase E1 alpha subunit                                          |
| PMM1289 | 2 | -1.67     | 0.63 | 0.45 | 1.00 | Transport and binding proteins                        | Type II alternative RNA polymerase sigma factor, sigma-70 family                 |
| PMM1293 | 2 | 1.90      | 0.23 | 0.16 | 0.28 | Other                                                 | FKBP-type peptidyl-prolyl cis-trans isomerase (PPIase)                           |
| PMM1294 | 2 | 2.39      | 0.25 | 0.17 | 0.14 | Hydrogenase                                           | putative nickel-containing superoxide dismutase precursor (NISOD)                |
| PMM1296 | 2 | -0.71     | 1.04 | 0.73 | 1.00 | Other                                                 | marine cyanobacterial conserved hypothetical                                     |
| PMM1298 | 2 | -1.96     | 0.88 | 0.62 | 0.59 | Regulatory functions                                  | putative dihydroliipoamide dehydrogenase                                         |
| PMM1299 | 2 | -0.23     | 0.36 | 0.25 | 1.00 | RNA synthesis, modification, and DNA transcription    | tRNA/rRNA methyltransferase (SpoU)                                               |
| PMM1300 | 2 | -1.39     | 0.78 | 0.55 | 0.37 | Degradation of RNA                                    | UDP-N-glucosamine 1-carboxyvinyltransferase                                      |
| PMM1301 | 2 | -1.02     | 0.91 | 0.64 | 1.00 | Glutamate family / Nitrogen assimilation              | Aminotransferase class-III pyridoxal-phosphate:Acetylornithin...                 |
| PMM1304 | 2 | 0.10      | 0.45 | 0.32 | 1.00 | Other                                                 | possible cytosine deaminase                                                      |
| PMM1305 | 2 | -1.03     | 0.55 | 0.39 | 0.66 | Conserved hypothetical protein                        | conserved hypothetical protein                                                   |
| PMM1307 | 2 | -0.28     | 0.02 | 0.02 | 1.00 | Conserved hypothetical protein                        | conserved hypothetical protein                                                   |
| PMM1309 | 2 | 1.24      | 0.48 | 0.34 | 1.00 | Cell division                                         | Cell division protein FtsZ;Tubulin/FtsZ family                                   |
| PMM1310 | 2 | -0.54     | 0.83 | 0.59 | 1.00 | Regulatory functions                                  | putative Ketopantoate hydroxymethyltransferase                                   |
| PMM1312 | 2 | -1.35     | 0.32 | 0.23 | 1.00 | Conserved hypothetical protein                        | conserved hypothetical protein                                                   |
| PMM1313 | 2 | 0.85      | 0.49 | 0.34 | 1.00 | Degradation of proteins, peptides, and glycopeptides  | Cip protease proteolytic subunit                                                 |
| PMM1314 | 2 | 1.82      | 0.67 | 0.47 | 0.39 | Degradation of proteins, peptides, and glycopeptides  | Cip protease proteolytic subunit                                                 |
| PMM1315 | 2 | -0.74     | 0.31 | 0.22 | 1.00 | Branched chain family                                 | Ketol-acid reductoisomerase                                                      |
| PMM1317 | 2 | 2.15      | 0.35 | 0.25 | 0.02 | Adaptations and atypical conditions                   | possible high light inducible protein                                            |
| PMM1318 | 2 | -1.54     | 1.65 | 1.16 | 0.70 | Conserved hypothetical protein                        | conserved hypothetical                                                           |
| PMM1319 | 2 | -1.40     | 0.76 | 0.54 | 0.41 | Drug and analog sensitivity                           | possible Beta-lactamase                                                          |
| PMM1321 | 2 | -0.69     | 0.44 | 0.31 | 1.00 | Nucleoproteins                                        | Bacterial histone-like DNA-binding protein                                       |
| PMM1322 | 2 | -0.15     | 0.15 | 0.11 | 1.00 | Other                                                 | Putative isoamylase                                                              |
| PMM1323 | 2 | -0.90     | 1.03 | 0.73 | 1.00 | Regulatory functions                                  | putative GPH family sugar transporter                                            |
| PMM1324 | 2 | -0.80     | 0.06 | 0.04 | 1.00 | Transport and binding proteins                        | possible transporter, membrane component                                         |
| PMM1325 | 2 | -0.42     | 0.88 | 0.63 | 1.00 | Conserved hypothetical protein                        | conserved hypothetical protein                                                   |
| PMM1327 | 2 | -0.88     | 0.61 | 0.43 | 0.78 | Conserved hypothetical protein                        | conserved hypothetical protein                                                   |
| PMM1330 | 2 | 3.55      | 1.56 | 1.10 | 0.00 | Conserved hypothetical protein                        | conserved hypothetical protein                                                   |
| PMM1331 | 2 | 0.01      | 0.68 | 0.48 | 1.00 | Conserved hypothetical protein                        | conserved hypothetical protein                                                   |
| PMM1333 | 2 | -1.95     | 1.29 | 0.91 | 0.00 | Protein modification and translation factors          | Peptide methionine sulfoxide reductase                                           |
| PMM1336 | 2 | -3.15     | 3.93 | 2.78 | 1.00 | Fatty acid, phospholipid and sterol metabolism        | Putative (3R)-hydroxymyristoyl-[acyl carrier protein] dehydratase                |
| PMM1339 | 2 | -1.02     | 0.16 | 0.11 | 1.00 | Purine ribonucleotide biosynthesis                    | SAICAR synthetase                                                                |
| PMM1340 | 2 | -1.35     | 0.25 | 0.18 | 1.00 | Purine ribonucleotide biosynthesis                    | phosphoribosylglycinamide synthetase                                             |
| PMM1342 | 2 | -0.57     | 0.28 | 0.20 | 1.00 | Other                                                 | possible circadian clock protein KaiC                                            |
| PMM1343 | 2 | -0.03     | 0.28 | 0.20 | 1.00 | Other                                                 | possible circadian oscillation regulator KaiB                                    |
| PMM1344 | 2 | 0.45      | 0.44 | 0.31 | 1.00 | Ribosomal proteins                                    | 50S ribosomal protein L21                                                        |
| PMM1345 | 2 | -0.08     | 0.80 | 0.57 | 1.00 | Ribosomal proteins                                    | 50S ribosomal protein L27                                                        |
| PMM1346 | 2 | 0.32      | 0.73 | 0.52 | 0.88 | Conserved hypothetical protein                        | conserved hypothetical protein                                                   |
| PMM1349 | 2 | -0.55     | 0.66 | 0.47 | 1.00 | Conserved hypothetical protein                        | conserved hypothetical protein                                                   |
| PMM1350 | 2 | -0.59     | 0.99 | 0.70 | 1.00 | Other                                                 | Pentapeptide repeats                                                             |
| PMM1351 | 2 | 0.99      | 0.68 | 0.48 | 0.67 | Conserved hypothetical protein                        | conserved hypothetical protein                                                   |
| PMM1352 | 2 | -1.94     | 0.54 | 0.38 | 1.00 | Soluble electron carriers                             | Ferredoxin                                                                       |
| PMM1354 | 2 | -1.18     | 1.16 | 0.89 | 0.82 | Regulatory functions                                  | putative D-3-phosphoglycerate dehydrogenase (PGDH)                               |
| PMM1355 | 2 | -1.62     | 0.50 | 0.36 | 0.18 | Conserved hypothetical protein                        | conserved hypothetical protein                                                   |
| PMM1363 | 2 | 0.33      | 0.05 | 0.03 | 0.90 | Conserved hypothetical protein                        | hypothetical                                                                     |
| PMM1365 | 2 | 2.65      | 0.69 | 0.49 | 0.00 | Regulatory functions                                  | possible MATH domain                                                             |
| PMM1368 | 2 | -0.63     | 0.09 | 0.06 | 0.95 | Conserved hypothetical protein                        | conserved hypothetical protein                                                   |
| PMM1369 | 2 | -0.79     | 0.15 | 0.11 | 1.00 | Regulatory functions                                  | GAF domain                                                                       |
| PMM1372 | 2 | -1.45     | 0.97 | 0.68 | 0.50 | Conserved hypothetical protein                        | conserved hypothetical protein                                                   |
| PMM1375 | 2 | -1.84     | 0.52 | 0.37 | 0.33 | Conserved hypothetical protein                        | possible M protein repeat                                                        |
| PMM1376 | 2 | -0.61     | 1.11 | 0.79 | 0.64 | Nucleoproteins                                        | RNA-binding protein RbpD                                                         |
| PMM1377 | 2 | 4.12      | 2.01 | 1.42 | 0.00 | Other                                                 | possible dihydroflavonol-4-reductase (maize, petunia, tomato)...                 |
| PMM1382 | 2 | -0.92     | 0.06 | 0.04 | 0.68 | Fatty acid, phospholipid and sterol metabolism        | fatty acid desaturase, type 2                                                    |
| PMM1383 | 2 | 1.26      | 1.35 | 0.95 | 0.67 | Conserved hypothetical protein                        | conserved hypothetical protein                                                   |
| PMM1384 | 2 | -0.80     | 0.09 | 0.06 | 1.00 | Adaptations and atypical conditions                   | possible high light inducible protein                                            |
| PMM1385 | 2 | -0.74     | 0.08 | 0.06 | 1.00 | Adaptations and atypical conditions                   | possible high light inducible protein                                            |
| PMM1387 | 2 | -3.21     | 1.01 | 0.72 | 0.00 | Conserved hypothetical protein                        | hypothetical                                                                     |
| PMM1388 | 2 | -2.52     | 0.57 | 0.40 | 0.00 | Conserved hypothetical protein                        | conserved hypothetical protein                                                   |
| PMM1390 | 2 | -1.39     | 0.56 | 0.39 | 1.00 | Adaptations and atypical conditions                   | possible high light inducible protein                                            |
| PMM1391 | 2 | 3.45      | 0.43 | 0.30 | 0.00 | Regulatory functions                                  | possible Helix-turn-helix protein, copG family                                   |
| PMM1392 | 2 | -2.53     | 1.15 | 0.81 | 0.00 | Branched chain family                                 | possible Heat-labile enterotoxin alpha chain                                     |
| PMM1394 | 2 | -2.31     | 0.28 | 0.20 | 0.00 | Conserved hypothetical protein                        | hypothetical                                                                     |
| PMM1395 | 2 | -3.47     | 1.42 | 1.01 | 0.00 | Conserved hypothetical protein                        | hypothetical                                                                     |
| PMM1396 | 2 | -2.02     | 0.68 | 0.48 | 1.00 | Adaptations and atypical conditions                   | possible high light inducible protein                                            |
| PMM1397 | 2 | -0.84     | 0.68 | 0.48 | 1.00 | Adaptations and atypical conditions                   | possible high light inducible protein                                            |
| PMM1398 | 2 | -0.82     | 0.37 | 0.26 | 1.00 | Adaptations and atypical conditions                   | possible high light inducible protein                                            |
| PMM1399 | 2 | -1.90     | 0.64 | 0.45 | 0.16 | Adaptations and atypical conditions                   | possible high light inducible protein                                            |
| PMM1400 | 2 | -1.46     | 0.37 | 0.26 | 1.00 | Other                                                 | possible Hemagglutinin-neuraminidase                                             |
| PMM1401 | 2 | -0.18     | 0.23 | 0.17 | 1.00 | Conserved hypothetical protein                        | conserved hypothetical                                                           |
| PMM1402 | 2 | -1.00     | 0.42 | 0.29 | 0.98 | Conserved hypothetical protein                        | unnamed protein product                                                          |
| PMM1404 | 2 | -2.03     | 1.38 | 0.98 | 0.41 | Adaptations and atypical conditions                   | possible high light inducible protein                                            |
| PMM1405 | 2 | -0.82     | 0.04 | 0.03 | 0.88 | Conserved hypothetical protein                        | hypothetical                                                                     |
| PMM1407 | 2 | -1.31     | 0.22 | 0.16 | 0.40 | Other                                                 | possible SRP19 protein                                                           |
| PMM1408 | 2 | -1.97     | 0.93 | 0.66 | 0.00 | Conserved hypothetical protein                        | hypothetical                                                                     |
| PMM1409 | 2 | -1.46     | 0.02 | 0.02 | 0.38 | Other                                                 | possible Rubredoxin                                                              |
| PMM1412 | 2 | 3.01      | 1.15 | 0.81 | 0.00 | Conserved hypothetical protein                        | conserved hypothetical protein                                                   |

|         |   |           |      |      |      |                                                      |                                                                  |
|---------|---|-----------|------|------|------|------------------------------------------------------|------------------------------------------------------------------|
| PMM1413 | 2 | 0.73      | 0.78 | 0.55 | 0.85 | Conserved hypothetical protein                       | conserved hypothetical                                           |
| PMM1416 | 2 | -0.37     | 0.23 | 0.16 | 1.00 | Conserved hypothetical protein                       | conserved hypothetical                                           |
| PMM1419 | 2 | -0.67     | 0.62 | 0.44 | 1.00 | Transport and binding proteins                       | possible ATP synthase B/B' CF(0)                                 |
| PMM1422 | 2 | -1.44     | 0.39 | 0.27 | 0.21 | Conserved hypothetical protein                       | conserved hypothetical protein                                   |
| PMM1423 | 2 | -0.87     | 0.72 | 0.51 | 0.71 | Conserved hypothetical protein                       | conserved hypothetical protein                                   |
| PMM1424 | 2 | -0.14     | 0.39 | 0.28 | 1.00 | Other                                                | possible Uncharacterized protein family UPF003                   |
| PMM1427 | 2 | 0.21      | 0.97 | 0.68 | 1.00 | Conserved hypothetical protein                       | conserved hypothetical                                           |
| PMM1428 | 2 | -1.19     | 0.63 | 0.45 | 0.45 | Conserved hypothetical protein                       | conserved hypothetical protein                                   |
| PMM1429 | 2 | -2.61     | 1.78 | 1.26 | 0.00 | Conserved hypothetical protein                       | conserved hypothetical protein                                   |
| PMM1430 | 2 | -0.22     | 0.31 | 0.22 | 1.00 | Conserved hypothetical protein                       | conserved hypothetical protein                                   |
| PMM1431 | 2 | -0.32     | 0.15 | 0.11 | 1.00 | RNA synthesis, modification, and DNA transcription   | putative DNA-directed RNA polymerase (omega chain)               |
| PMM1434 | 2 | -1.01     | 0.61 | 0.43 | 1.00 | Glycolysis                                           | Phosphoglycerate mutase, co-factor-independent (iPGM)            |
| PMM1435 | 2 | -1.79     | 1.02 | 0.72 | 0.02 | Conserved hypothetical protein                       | conserved hypothetical protein                                   |
| PMM1436 | 2 | 1.77      | 0.10 | 0.07 | 1.00 | Chaperones                                           | GroEL protein (Chaperonin cpn60)                                 |
| PMM1437 | 2 | 1.71      | 0.45 | 0.32 | 1.00 | Chaperones                                           | GroES protein (Chaperonin cpn10)                                 |
| PMM1438 | 2 | -0.57     | 0.51 | 0.36 | 1.00 | ATP synthase                                         | ATP synthase beta subunit, central region:ATP synth...           |
| PMM1440 | 2 | 0.01      | 0.58 | 0.41 | 1.00 | Conserved hypothetical protein                       | conserved hypothetical protein                                   |
| PMM1441 | 2 | 0.07      | 0.14 | 0.10 | 1.00 | Conserved hypothetical protein                       | hypothetical                                                     |
| PMM1442 | 2 | -1.81     | 0.44 | 0.31 | 0.06 | Regulatory functions                                 | putative aminopeptidase P                                        |
| PMM1443 | 2 | -0.96     | 0.40 | 0.29 | 0.66 | Conserved hypothetical protein                       | Domain of unknown function DUF21                                 |
| PMM1449 | 2 | -1.65     | 1.70 | 1.20 | 0.46 | Soluble electron carriers                            | Ferredoxin                                                       |
| PMM1451 | 2 | 0.40      | 0.28 | 0.20 | 1.00 | ATP synthase                                         | ATP synthase alpha subunit, central region:ATP synth...          |
| PMM1452 | 2 | 0.00      | 1.00 | 0.71 | 1.00 | ATP synthase                                         | ATP synthase delta (OSCP) subunit                                |
| PMM1453 | 2 | -0.68     | 0.46 | 0.33 | 1.00 | ATP synthase                                         | ATP synthase B/B' CF(0)                                          |
| PMM1454 | 2 | -0.92     | 0.17 | 0.12 | 1.00 | ATP synthase                                         | ATP synthase B/B' CF(0)                                          |
| PMM1455 | 2 | -0.61     | 0.72 | 0.51 | 1.00 | Membranes, lipoproteins and porins                   | Eubacterial and plasma membrane ATP synthase subunit C:ATP sy... |
| PMM1456 | 2 | -0.47     | 1.69 | 1.19 | 1.00 | ATP synthase                                         | ATP synthase A subunit                                           |
| PMM1457 | 2 | -0.64     | 0.02 | 0.02 | 1.00 | Conserved hypothetical protein                       | possible ATP synthase subunit 1                                  |
| PMM1459 | 2 | -0.09     | 1.22 | 0.86 | 1.00 | Regulatory functions                                 | putative c-type cytochrome biogenesis protein CcdA               |
| PMM1462 | 2 | -1.78     | 1.06 | 0.75 | 0.23 | Conserved hypothetical protein                       | conserved hypothetical protein                                   |
| PMM1463 | 2 | -1.74     | 0.99 | 0.70 | 0.23 | Other                                                | Nitrogen regulatory protein P-II                                 |
| PMM1477 | 2 | 0.79      | 0.81 | 0.57 | 0.81 | Conserved hypothetical protein                       | conserved hypothetical                                           |
| PMM1478 | 2 | -0.22     | 0.27 | 0.19 | 1.00 | Conserved hypothetical protein                       | conserved hypothetical protein                                   |
| PMM1479 | 2 | -0.37     | 0.18 | 0.13 | 1.00 | Conserved hypothetical protein                       | conserved hypothetical protein                                   |
| PMM1480 | 2 | 0.22      | 0.73 | 0.52 | 0.98 | Conserved hypothetical protein                       | conserved hypothetical protein                                   |
| PMM1482 | 2 | #NAME? NA | NA   | 0.09 | 0.09 | Adaptations and atypical conditions                  | possible high light inducible protein                            |
| PMM1483 | 2 | -0.03     | 0.20 | 0.14 | 1.00 | RNA synthesis, modification, and DNA transcription   | RNA polymerase beta prime subunit                                |
| PMM1484 | 2 | -0.19     | 0.32 | 0.22 | 1.00 | RNA synthesis, modification, and DNA transcription   | RNA polymerase gamma subunit                                     |
| PMM1485 | 2 | -0.61     | 0.18 | 0.12 | 1.00 | RNA synthesis, modification, and DNA transcription   | RNA polymerase beta subunit                                      |
| PMM1487 | 2 | -0.31     | 0.81 | 0.58 | 1.00 | Ribosomal proteins                                   | 30S Ribosomal protein S20                                        |
| PMM1489 | 2 | 1.85      | 0.33 | 0.23 | 0.04 | Other                                                | Ribose 5-phosphate isomerase                                     |
| PMM1490 | 2 | -1.38     | 0.54 | 0.38 | 0.30 | Degradation of proteins, peptides, and glycopeptides | Serine proteases, trypsin family:Chymotrypsin serine protease... |
| PMM1492 | 2 | 0.42      | 0.06 | 0.04 | 1.00 | RNA synthesis, modification, and DNA transcription   | N utilization substance protein A                                |
| PMM1494 | 2 | -0.31     | 0.61 | 0.43 | 1.00 | Protein modification and translation factors         | Translation initiation factor IF-2                               |
| PMM1495 | 2 | -1.49     | 0.89 | 0.63 | 0.48 | Conserved hypothetical protein                       | hypothetical                                                     |
| PMM1498 | 2 | -1.22     | 0.60 | 0.42 | 1.00 | Conserved hypothetical protein                       | conserved hypothetical protein                                   |
| PMM1499 | 2 | 1.26      | 0.94 | 0.66 | 0.31 | Conserved hypothetical protein                       | conserved hypothetical protein                                   |
| PMM1500 | 2 | -0.73     | 0.02 | 0.02 | 1.00 | Regulatory functions                                 | putative aminotransferase                                        |
| PMM1501 | 2 | -0.72     | 0.06 | 0.04 | 1.00 | Other                                                | S1 RNA binding domain:Ribonuclease E and G                       |
| PMM1504 | 2 | -1.60     | 1.02 | 0.72 | 0.23 | Aromatic amino acid family                           | Chorismate mutase-Prephenate dehydratase                         |
| PMM1506 | 2 | 2.35      | 1.08 | 0.76 | 0.00 | Regulatory functions                                 | ATP-dependent protease La (LON) domain                           |
| PMM1507 | 2 | 0.91      | 0.73 | 0.51 | 1.00 | Ribosomal proteins                                   | 30S ribosomal protein S10                                        |
| PMM1508 | 2 | 0.03      | 1.65 | 1.17 | 1.00 | Protein modification and translation factors         | Elongation factor Tu                                             |
| PMM1509 | 2 | 0.54      | 0.69 | 0.49 | 1.00 | Protein modification and translation factors         | Elongation factor G                                              |
| PMM1510 | 2 | -0.05     | 0.42 | 0.30 | 1.00 | Ribosomal proteins                                   | 30S ribosomal protein S7                                         |
| PMM1511 | 2 | -0.34     | 0.07 | 0.05 | 1.00 | Ribosomal proteins                                   | 30S ribosomal protein S12                                        |
| PMM1512 | 2 | -0.12     | 0.30 | 0.21 | 1.00 | Glutamate family / Nitrogen assimilation             | Ferredoxin-dependent glutamate synthase, Fd-GOGAT                |
| PMM1514 | 2 | 2.02      | 1.62 | 1.14 | 0.10 | Other                                                | lipoic acid synthetase                                           |
| PMM1515 | 2 | -0.25     | 1.96 | 1.39 | 0.85 | Other                                                | Site-specific recombinase                                        |
| PMM1519 | 2 | 0.80      | 0.71 | 0.50 | 1.00 | Photosystem I                                        | Photosystem I PsaI protein (subunit XI)                          |
| PMM1520 | 2 | -0.12     | 0.54 | 0.38 | 1.00 | Photosystem I                                        | photosystem I subunit VIII (PsaI)                                |
| PMM1523 | 2 | 1.99      | 0.07 | 0.05 | 1.00 | Photosystem I                                        | Photosystem I PsaB protein                                       |
| PMM1524 | 2 | 0.91      | 0.28 | 0.20 | 1.00 | Photosystem I                                        | Photosystem I PsaA protein                                       |
| PMM1528 | 2 | 1.08      | 1.19 | 0.84 | 0.46 | DNA replication, recombination, and repair           | HNH endonuclease family protein                                  |
| PMM1530 | 2 | -1.54     | 0.28 | 0.20 | 0.37 | Ribosomal proteins                                   | 50S ribosomal protein L31                                        |
| PMM1531 | 2 | -1.59     | 0.25 | 0.17 | 1.00 | Ribosomal proteins                                   | 30S ribosomal protein S9                                         |
| PMM1532 | 2 | 0.58      | 0.45 | 0.32 | 1.00 | Ribosomal proteins                                   | 50S ribosomal protein L13                                        |
| PMM1534 | 2 | -0.15     | 0.84 | 0.59 | 1.00 | Ribosomal proteins                                   | 50S ribosomal protein L17                                        |
| PMM1535 | 2 | 0.65      | 1.11 | 0.79 | 1.00 | RNA synthesis, modification, and DNA transcription   | Bacterial RNA polymerase, alpha chain                            |
| PMM1536 | 2 | 0.51      | 0.09 | 0.06 | 1.00 | Ribosomal proteins                                   | 30S ribosomal protein S11                                        |
| PMM1537 | 2 | -0.34     | 0.40 | 0.28 | 1.00 | Ribosomal proteins                                   | 30S ribosomal protein S13                                        |
| PMM1538 | 2 | -0.55     | 0.15 | 0.10 | 1.00 | Ribosomal proteins                                   | 50S Ribosomal protein L36                                        |
| PMM1540 | 2 | -1.06     | 0.64 | 0.45 | 0.75 | Protein and peptide secretion                        | preprotein translocase SecY subunit                              |
| PMM1541 | 2 | 0.41      | 0.89 | 0.63 | 0.68 | Ribosomal proteins                                   | 50S ribosomal protein L15                                        |
| PMM1542 | 2 | 0.94      | 0.22 | 0.16 | 0.56 | Ribosomal proteins                                   | 30S ribosomal protein S5                                         |
| PMM1543 | 2 | 2.03      | 1.21 | 0.85 | 0.00 | Ribosomal proteins                                   | 50S ribosomal protein L18                                        |
| PMM1544 | 2 | 0.59      | 1.00 | 0.71 | 1.00 | Ribosomal proteins                                   | 50S ribosomal protein L6                                         |
| PMM1545 | 2 | -0.48     | 0.64 | 0.45 | 0.82 | Ribosomal proteins                                   | 30S ribosomal protein S8                                         |
| PMM1546 | 2 | 0.14      | 1.41 | 1.00 | 1.00 | Ribosomal proteins                                   | 50S ribosomal protein L5                                         |
| PMM1548 | 2 | 0.48      | 0.10 | 0.07 | 0.85 | Ribosomal proteins                                   | 50S Ribosomal protein L14                                        |
| PMM1549 | 2 | 0.94      | 1.99 | 1.40 | 1.00 | Ribosomal proteins                                   | 30S Ribosomal protein S17                                        |
| PMM1550 | 2 | -1.74     | 1.62 | 1.30 | 0.06 | Conserved hypothetical protein                       | 50S ribosomal protein L29                                        |
| PMM1551 | 2 | 0.75      | 0.22 | 0.15 | 1.00 | Ribosomal proteins                                   | 50S ribosomal protein L16                                        |
| PMM1552 | 2 | -0.45     | 0.44 | 0.31 | 1.00 | Ribosomal proteins                                   | 30S ribosomal protein S3                                         |
| PMM1553 | 2 | -0.32     | 0.23 | 0.16 | 1.00 | Ribosomal proteins                                   | 50S ribosomal protein L22                                        |
| PMM1554 | 2 | 0.52      | 0.32 | 0.22 | 0.91 | Ribosomal proteins                                   | 30S Ribosomal protein S19                                        |
| PMM1555 | 2 | -0.72     | 0.29 | 0.21 | 1.00 | Ribosomal proteins                                   | 50S ribosomal protein L2                                         |
| PMM1556 | 2 | -0.73     | 0.18 | 0.13 | 1.00 | Ribosomal proteins                                   | 50S ribosomal protein L23                                        |
| PMM1557 | 2 | -0.74     | 2.31 | 1.64 | 0.89 | Ribosomal proteins                                   | 50S ribosomal protein L4                                         |
| PMM1558 | 2 | -0.82     | 0.94 | 0.66 | 1.00 | Ribosomal proteins                                   | 50S ribosomal protein L3                                         |
| PMM1559 | 2 | 0.05      | 1.31 | 0.92 | 1.00 | Conserved hypothetical protein                       | conserved hypothetical protein                                   |
| PMM1562 | 2 | -1.32     | 0.89 | 0.63 | 1.00 | DNA replication, recombination, and repair           | RecA bacterial DNA recombination protein                         |
| PMM1563 | 2 | 0.15      | 1.32 | 0.93 | 1.00 | Conserved hypothetical protein                       | conserved hypothetical protein                                   |
| PMM1566 | 2 | -1.14     | 1.29 | 0.91 | 1.00 | Conserved hypothetical protein                       | conserved hypothetical protein                                   |
| PMM1568 | 2 | 0.23      | 0.03 | 0.02 | 1.00 | Conserved hypothetical protein                       | conserved hypothetical protein                                   |
| PMM1570 | 2 | -1.74     | 0.30 | 0.21 | 0.48 | Cobalamin, heme, phycobillin and porphyrin           | ATP:corrinoid adenosyltransferase BtuR/CobO/CobP                 |
| PMM1571 | 2 | -0.23     | 0.90 | 0.64 | 1.00 | Conserved hypothetical protein                       | conserved hypothetical protein                                   |
| PMM1575 | 2 | -0.35     | 0.59 | 0.42 | 1.00 | Pyruvate and acetyl-CoA metabolism                   | Phosphoenolpyruvate carboxylase                                  |
| PMM1578 | 2 | 4.02      | 0.37 | 0.26 | 0.00 | Photosystem I                                        | Photosystem I protein PsaD                                       |
| PMM1581 | 2 | -0.70     | 0.60 | 0.42 | 1.00 | Regulatory functions                                 | MRP protein homolog                                              |
| PMM1583 | 2 | -0.69     | 0.11 | 0.08 | 0.75 | Conserved hypothetical protein                       | conserved hypothetical protein                                   |
| PMM1585 | 2 | #NAME? NA | NA   | 1.00 | 1.00 | Conserved hypothetical protein                       | conserved hypothetical protein                                   |
| PMM1588 | 2 | -0.55     | 0.68 | 0.48 | 1.00 | Regulatory functions                                 | possible Conserved carboxylase domain                            |
| PMM1594 | 2 | -0.68     | 0.24 | 0.17 | 1.00 | Cobalamin, heme, phycobillin and porphyrin           | Heme oxygenase                                                   |
| PMM1596 | 2 | 0.42      | 0.41 | 0.29 | 1.00 | Other                                                | Isocitrate dehydrogenase                                         |
| PMM1599 | 2 | -0.57     | 0.31 | 0.22 | 1.00 | Conserved hypothetical protein                       | conserved hypothetical protein                                   |
| PMM1600 | 2 | 1.05      | 1.40 | 0.99 | 0.67 | Transport and binding proteins                       | putative Na <sup>+</sup> /H <sup>+</sup> antiporter, CPA2 family |
| PMM1601 | 2 | -0.61     | 0.01 | 0.01 | 1.00 | Other                                                | phosphorylase                                                    |
| PMM1602 | 2 | 1.01      | 0.82 | 0.58 | 1.00 | Conserved hypothetical protein                       | conserved hypothetical protein                                   |
| PMM1603 | 2 | 0.55      | 2.08 | 1.47 | 1.00 | Regulatory functions                                 | putative ribonuclease III                                        |
| PMM1604 | 2 | 0.09      | 0.34 | 0.24 | 1.00 | Conserved hypothetical protein                       | conserved hypothetical protein                                   |
| PMM1605 | 2 | 0.95      | 0.35 | 0.03 | 1.00 | Protein modification and translation factors         | possible 16S rRNA processing protein RimM                        |
| PMM1606 | 2 | -0.52     | 0.71 | 0.50 | 1.00 | Other                                                | Glutamine-fructose-6-phosphate transaminase (isomerizing)        |
| PMM1607 | 2 | 0.71      | 0.31 | 0.22 | 1.00 | Photosystem I                                        | Photosystem I subunit PsaC                                       |
| PMM1608 | 2 | 2.09      | 0.51 | 0.36 | 0.46 | Fatty acid, phospholipid and sterol metabolism       | acyl carrier protein (ACP)                                       |

|         |   |       |      |               |                                                           |                                                                                   |
|---------|---|-------|------|---------------|-----------------------------------------------------------|-----------------------------------------------------------------------------------|
| PMM1609 | 2 | 1.53  | 0.32 | 0.22          | 1.00 Fatty acid, phospholipid and sterol metabolism       | 3-oxoacyl-[acyl-carrier-protein] synthase II                                      |
| PMM1610 | 2 | 0.04  | 1.00 | 0.70          | 1.00 Other                                                | Transekolase                                                                      |
| PMM1611 | 2 | -0.47 | 0.01 | 1.00 Thiamine | ThiC family                                               |                                                                                   |
| PMM1613 | 2 | 0.10  | 1.31 | 0.93          | 1.00 Other                                                | Zinc metallopeptidase M20/M25/M40 family                                          |
| PMM1615 | 2 | -2.79 | 0.10 | 0.07          | 0.00 DNA replication, recombination, and repair           | Holliday junction DNA helicase RuvB                                               |
| PMM1616 | 2 | 0.34  | 1.60 | 1.13          | 0.78 Other                                                | tmRNA binding protein SmpB                                                        |
| PMM1617 | 2 | -0.87 | 0.44 | 0.31          | 1.00 Conserved hypothetical protein                       | conserved hypothetical protein                                                    |
| PMM1619 | 2 | -0.70 | 0.20 | 0.14          | 1.00 Regulatory functions                                 | two-component response regulator                                                  |
| PMM1622 | 2 | 1.09  | 0.03 | 0.02          | 0.86 Murein sacculus and peptidoglycan                    | Rod shape determining protein                                                     |
| PMM1623 | 2 | 0.70  | 0.11 | 0.08          | 1.00 DNA replication, recombination, and repair           | single-stranded DNA-binding protein                                               |
| PMM1625 | 2 | 1.17  | 0.60 | 0.43          | 1.00 Amino acids and amines                               | putative adenosylhomocysteinase                                                   |
| PMM1626 | 2 | -1.42 | 0.13 | 0.09          | 0.43 Conserved hypothetical protein                       | conserved hypothetical protein                                                    |
| PMM1629 | 2 | 0.40  | 0.04 | 0.03          | 1.00 Transport and binding proteins                       | Type II alternative RNA polymerase sigma factor, sigma-70 family                  |
| PMM1630 | 2 | -0.92 | 0.51 | 0.36          | 1.00 Transport and binding proteins                       | MgtE family, putative magnesium transport protein                                 |
| PMM1634 | 2 | 1.28  | 0.85 | 0.60          | 0.64 DNA replication, recombination, and repair           | DNA gyrase, subunit B                                                             |
| PMM1635 | 2 | -1.24 | 0.49 | 0.35          | 0.53 Aminoacyl tRNA synthetases and tRNA modification     | tRNA delta-2-isopentenylpyrophosphate (IPP) transferase                           |
| PMM1636 | 2 | -1.24 | 0.20 | 0.14          | 1.00 Protein modification and translation factors         | Translation initiation factor 3                                                   |
| PMM1639 | 2 | -0.09 | 0.25 | 0.18          | 1.00 Protein and peptide secretion                        | Preprotein translocase SecA subunit                                               |
| PMM1640 | 2 | -1.80 | 0.13 | 0.09          | 0.20 Regulatory functions                                 | putative acetyltransferase, GNAT family                                           |
| PMM1642 | 2 | -1.00 | 0.59 | 0.42          | 1.00 Regulatory functions                                 | possible transcription regulator                                                  |
| PMM1643 | 2 | -0.59 | 0.70 | 0.50          | 1.00 Riboflavin                                           | Putative 6,7-dimethyl-8-ribitylumazine synthase or riboflavin synthase beta chain |
| PMM1644 | 2 | -0.24 | 0.72 | 0.51          | 1.00 Photosystem II                                       | possible Photosystem II reaction center Z protein (PsbZ)                          |
| PMM1648 | 2 | -0.37 | 0.41 | 0.29          | 1.00 Branched chain family                                | Aspartate kinase                                                                  |
| PMM1649 | 2 | 1.60  | 0.81 | 0.57          | 0.23 DNA replication, recombination, and repair           | Excinuclease ABC subunit B (UvrB)                                                 |
| PMM1650 | 2 | 1.55  | 0.53 | 0.37          | 0.44 Conserved hypothetical protein                       | conserved hypothetical protein                                                    |
| PMM1652 | 2 | -0.42 | 0.83 | 0.58          | 1.00 Conserved hypothetical protein                       | conserved hypothetical protein                                                    |
| PMM1653 | 2 | 0.51  | 0.45 | 0.31          | 1.00 Aspartate family                                     | Dihydrodipicolinate synthetase                                                    |
| PMM1655 | 2 | -1.35 | 0.99 | 0.70          | 0.57 Other                                                | FKBP-type peptidyl-prolyl cis-trans isomerase (PPIase)                            |
| PMM1656 | 2 | 1.19  | 1.49 | 1.06          | 0.64 Degradation of proteins, peptides, and glycopeptides | Clp protease proteolytic subunit                                                  |
| PMM1657 | 2 | -0.41 | 0.38 | 0.27          | 1.00 Degradation of proteins, peptides, and glycopeptides | Clp protease ATP-binding subunit, ClpX                                            |
| PMM1661 | 2 | -1.53 | 0.33 | 0.23          | 0.78 Ribosomal proteins                                   | 50S ribosomal protein L35                                                         |
| PMM1662 | 2 | -1.39 | 0.64 | 0.46          | 1.00 Ribosomal proteins                                   | 50S ribosomal protein L20                                                         |
| PMM1665 | 2 | -0.22 | 0.05 | 0.04          | 1.00 Fatty acid, phospholipid and sterol metabolism       | sulfolipid (UDP-sulfoquinovose) biosynthesis protein                              |
| PMM1667 | 2 | -0.28 | 0.63 | 0.45          | 1.00 Conserved hypothetical protein                       | conserved hypothetical protein                                                    |
| PMM1669 | 2 | -1.58 | 0.58 | 0.41          | 0.12 Regulatory functions                                 | putative Glycine cleavage H-protein                                               |
| PMM1671 | 2 | -1.53 | 0.00 | 0.00          | 0.57 Conserved hypothetical protein                       | conserved hypothetical protein                                                    |
| PMM1672 | 2 | 0.09  | 0.09 | 0.07          | 1.00 Fatty acid, phospholipid and sterol metabolism       | Fatty acid desaturase, type 1                                                     |
| PMM1673 | 2 | -0.40 | 0.95 | 0.67          | 1.00 Ribosomal proteins                                   | 50S ribosomal protein L9                                                          |
| PMM1676 | 2 | 2.17  | 0.06 | 0.04          | 0.01 Conserved hypothetical protein                       | conserved hypothetical protein                                                    |
| PMM1678 | 2 | -0.05 | 0.50 | 0.36          | 1.00 Conserved hypothetical protein                       | conserved hypothetical protein                                                    |
| PMM1680 | 2 | -1.50 | 0.25 | 0.18          | 0.57 Conserved hypothetical protein                       | conserved hypothetical protein                                                    |
| PMM1683 | 2 | 0.14  | 0.08 | 0.05          | 1.00 Conserved hypothetical protein                       | conserved hypothetical protein                                                    |
| PMM1685 | 2 | -0.35 | 0.13 | 0.09          | 1.00 Regulatory functions                                 | putative spermidine synthase                                                      |
| PMM1688 | 2 | -1.71 | 0.01 | 0.01          | 0.11 Aminoacyl tRNA synthetases and tRNA modification     | Aspartyl-tRNA synthetase                                                          |
| PMM1689 | 2 | 0.68  | 0.07 | 0.05          | 1.00 Pyrimidine ribonucleotide biosynthesis               | Glutamine amidotransferase class-I:CTP synthase                                   |
| PMM1694 | 2 | -0.57 | 0.26 | 0.19          | 0.84 Cobalamin, heme, phycobilin and porphyrin            | putative uroporphyrin-III C-methyltransferase                                     |
| PMM1697 | 2 | 0.36  | 0.12 | 0.09          | 1.00 Transport and binding proteins                       | Type II alternative RNA polymerase sigma factor, sigma-70 family                  |
| PMM1700 | 2 | -0.78 | 0.14 | 0.10          | 1.00 Other                                                | Aconitate hydratase B                                                             |
| PMM1702 | 2 | -1.43 | 0.54 | 0.38          | 0.33 Purine ribonucleotide biosynthesis                   | formyltetrahydrofolate deformylase                                                |
| PMM1703 | 2 | -0.12 | 0.77 | 0.55          | 1.00 Transport and binding proteins                       | NAD binding site:D-amino acid oxidase                                             |
| PMM1704 | 2 | -0.62 | 0.02 | 0.01          | 1.00 Chaperones                                           | Molecular chaperone DnaK2, heat shock protein hsp70-2                             |
| PMM1706 | 2 | 2.06  | 2.45 | 1.73          | 1.00 Ribosomal proteins                                   | 30S ribosomal protein S6                                                          |
| PMM1707 | 2 | -0.38 | 0.43 | 0.30          | 1.00 Glutamate family / Nitrogen assimilation             | Argininosuccinate synthase                                                        |
| PMM1708 | 2 | 1.33  | 1.42 | 1.00          | 1.00 Conserved hypothetical protein                       | conserved hypothetical protein                                                    |
| PMM1716 | 2 | 0.12  | 0.77 | 0.54          | 1.00 Aspartate family                                     | No Cyanobase Name                                                                 |
| PMM1717 | 2 | -0.80 | 0.36 | 0.26          | 1.00 Other                                                | No Cyanobase Name                                                                 |
| PMM1718 | 2 | -2.32 | 1.19 | 0.84          | 1.00 Other                                                | No Cyanobase Name                                                                 |
