# Supplementary material for: Nitrogen cost minimization is promoted by structural changes in the transcriptome of N-deprived Prochlorococcus cells
Source: PubMed Central journal article supplement (PMC5607370; doi:10.1038/ismej.2017.88), 2017-06-06
Supplement: ismej201788x11.pdf [file ismej201788x11.pdf]

Table S4. Gene Expression For Genes with Top 50% Expression Values during 12 Hours Post Starvation

| Name    | Number | log2 Fold Change | Standard Deviation | Standard Error | p-value | Category                                                    | Definition                                                       |
|---------|--------|------------------|--------------------|----------------|---------|-------------------------------------------------------------|------------------------------------------------------------------|
| PM00001 | 2      | 0.89             | 1.01               | 0.71           | 0.54    | DNA replication, recombination, and repair                  | DNA polymerase III, beta chain                                   |
| PM00008 | 2      | 1.34             | 0.16               | 0.11           | 0.28    | Conserved hypothetical protein                              | conserved hypothetical protein                                   |
| PM00013 | 2      | -1.48            | 0.60               | 0.42           | 0.88    | Fatty acid, phospholipid and sterol metabolism              | RNA-binding region RNP-1 (RNA recognition motif)                 |
| PM00015 | 2      | 0.25             | 0.37               | 0.26           | 0.93    | Conserved hypothetical protein                              | Domain of unknown function DUF25                                 |
| PM00016 | 2      | -1.51            | 1.08               | 0.76           | 0.27    | Chaperones                                                  | Heat shock protein GrpE                                          |
| PM00017 | 2      | 1.71             | 0.02               | 0.01           | 0.10    | Chaperones                                                  | DnaI protein                                                     |
| PM00020 | 2      | -0.90            | 2.70               | 1.91           | 1.00    | Conserved hypothetical protein                              | conserved hypothetical protein                                   |
| PM00023 | 2      | -0.58            | 0.75               | 0.53           | 0.46    | CO2 fixation                                                | Glyceraldehyde 3-phosphate dehydrogenase(NADP+)(phosphorylating) |
| PM00025 | 2      | 0.18             | 0.31               | 0.22           | 0.83    | Protein modification and translation factors                | Cyclophilin-type peptidyl-prolyl cis-trans isomerase             |
| PM00026 | 2      | -1.42            | 1.65               | 1.16           | 0.08    | Protein modification and translation factors                | Elongation factor P (EF-P)                                       |
| PM00027 | 2      | 0.53             | 0.68               | 0.48           | 1.00    | Fatty acid, phospholipid and sterol metabolism              | Biotin / Lipoyl attachment:Acetyl-CoA biotin carboxyl carrier... |
| PM00030 | 2      | 5.12             | 1.40               | 0.99           | 0.00    | Protein modification and translation factors                | possible Transcription factor TFIIID (or TATA-b                  |
| PM00031 | 2      | 1.08             | 0.16               | 0.11           | 0.87    | DNA replication, recombination, and repair                  | HNH endonuclease:HNH nuclease                                    |
| PM00032 | 2      | 0.40             | 0.91               | 0.65           | 0.82    | Protein and peptide secretion                               | possible Bacterial type II secretion system pr                   |
| PM00033 | 2      | 0.93             | 0.78               | 0.55           | 0.96    | Conserved hypothetical protein                              | conserved hypothetical protein                                   |
| PM00034 | 2      | -0.09            | 0.89               | 0.63           | 0.71    | Conserved hypothetical protein                              | conserved hypothetical protein                                   |
| PM00035 | 2      | 2.04             | 1.39               | 0.99           | 0.22    | Hydrogenase                                                 | soluble hydrogenase small subunit                                |
| PM00037 | 2      | 1.19             | 0.33               | 0.24           | 0.55    | Purine ribonucleotide biosynthesis                          | Glutamine amidotransferase class-I-GMP synthase                  |
| PM00043 | 2      | -0.98            | 1.23               | 0.87           | 0.14    | Other                                                       | flavoprotein                                                     |
| PM00046 | 2      | -1.93            | 0.52               | 0.37           | 0.01    | Interconversions and salvage of nucleosides and nucleotides | Nucleoside diphosphate kinase                                    |
| PM00048 | 2      | 0.54             | 0.01               | 0.00           | 0.87    | Aminoacyl tRNA synthetases and tRNA modification            | Glutamyl-tRNA (Gln) amidotransferase subunit B                   |
| PM00051 | 2      | 0.83             | 0.16               | 0.11           | 0.72    | Conserved hypothetical protein                              | conserved hypothetical protein                                   |
| PM00055 | 2      | 0.88             | 1.12               | 0.79           | 0.68    | Conserved hypothetical protein                              | conserved hypothetical protein                                   |
| PM00056 | 2      | -1.09            | 2.52               | 1.78           | 0.86    | Conserved hypothetical protein                              | conserved hypothetical protein                                   |
| PM00058 | 2      | 3.06             | 0.22               | 0.15           | 0.00    | Conserved hypothetical protein                              | conserved hypothetical protein                                   |
| PM00059 | 2      | 0.52             | 0.37               | 0.26           | 1.00    | Conserved hypothetical protein                              | conserved hypothetical protein                                   |
| PM00060 | 2      | -0.41            | 0.32               | 0.23           | 0.57    | Fatty acid, phospholipid and sterol metabolism              | acetyl-CoA carboxylase, biotin carboxylase subunit               |
| PM00061 | 2      | -0.44            | 1.00               | 0.71           | 0.46    | Other                                                       | GGYT family, conserved hypothetical integral membrane protein    |
| PM00062 | 2      | -2.04            | 0.53               | 0.37           | 0.00    | Photosystem II                                              | photosystem II PsbX protein                                      |
| PM00063 | 2      | 1.82             | 0.14               | 0.10           | 0.89    | Conserved hypothetical protein                              | conserved hypothetical protein                                   |
| PM00064 | 2      | 1.71             | 1.19               | 0.84           | 0.46    | Adaptations and atypical conditions                         | possible high light inducible protein                            |
| PM00068 | 2      | 0.43             | 0.25               | 0.17           | 0.95    | Regulatory functions                                        | putative formylmethionine deformylase                            |
| PM00073 | 2      | -0.26            | 0.45               | 0.31           | 0.68    | Transport and binding proteins                              | ABC transporter, membrane component                              |
| PM00075 | 2      | 1.95             | 1.06               | 0.75           | 0.05    | Conserved hypothetical protein                              | conserved hypothetical protein                                   |
| PM00078 | 2      | -0.92            | 0.11               | 0.08           | 0.39    | Other                                                       | possible 4'-phosphopantetheinyl transferase family protein       |
| PM00079 | 2      | -1.86            | 0.23               | 0.16           | 0.00    | Transport and binding proteins                              | putative bacterioferritin comigratory (BCP) protein              |
| PM00083 | 2      | 1.48             | 1.06               | 0.75           | 0.49    | Serine family / Sulfur assimilation                         | Phosphoadenosine phosphosulfate reductase                        |
| PM00082 | 2      | 3.47             | 2.30               | 1.63           | 0.00    | Regulatory functions                                        | putative NADH dehydrogenase, transport associated                |
| PM00083 | 2      | -0.80            | 1.01               | 0.71           | 0.23    | Regulatory functions                                        | putative sodium/sulfate transporter, DASS family                 |
| PM00085 | 2      | 0.55             | 0.54               | 0.38           | 1.00    | Regulatory functions                                        | putative potassium channel, VIC family                           |
| PM00086 | 2      | -0.01            | 2.04               | 1.45           | 0.71    | Conserved hypothetical protein                              | Conserved hypothetical protein                                   |
| PM00087 | 2      | 2.87             | 1.77               | 1.25           | 0.00    | Conserved hypothetical protein                              | conserved hypothetical protein                                   |
| PM00088 | 2      | 1.77             | 0.94               | 0.67           | 0.19    | Conserved hypothetical protein                              | conserved hypothetical protein                                   |
| PM00091 | 2      | 1.28             | 1.46               | 1.03           | 0.36    | Conserved hypothetical protein                              | conserved hypothetical protein                                   |
| PM00092 | 2      | 2.26             | 1.76               | 1.24           | 0.19    | Conserved hypothetical protein                              | conserved hypothetical protein                                   |
| PM00093 | 2      | -0.68            | 0.13               | 0.09           | 1.00    | Adaptations and atypical conditions                         | possible high light inducible protein                            |
| PM00095 | 2      | -0.61            | 1.40               | 0.99           | 0.35    | Other                                                       | similar to serum resistance locus BRB                            |
| PM00099 | 2      | 1.68             | 1.07               | 0.76           | 0.22    | Conserved hypothetical protein                              | conserved hypothetical protein                                   |
| PM00101 | 2      | 0.93             | 0.34               | 0.24           | 0.56    | Conserved hypothetical protein                              | conserved hypothetical protein                                   |
| PM00103 | 2      | 1.79             | 0.56               | 0.40           | 0.19    | Conserved hypothetical protein                              | conserved hypothetical protein                                   |
| PM00105 | 2      | 1.05             | 0.53               | 0.37           | 0.37    | Riboflavin                                                  | RibD/ribG C-terminal domain                                      |
| PM00106 | 2      | 0.76             | 0.27               | 0.19           | 0.97    | Other                                                       | 6-pyruvoyl tetrahydropterin synthase                             |
| PM00111 | 2      | -0.06            | 0.64               | 0.45           | 0.73    | Conserved hypothetical protein                              | conserved hypothetical protein                                   |
| PM00114 | 2      | -0.79            | 2.06               | 1.46           | 0.19    | Conserved hypothetical protein                              | conserved hypothetical protein                                   |
| PM00115 | 2      | 0.28             | 0.75               | 0.53           | 0.85    | Carotenoid                                                  | zeta-carotene desaturase                                         |
| PM00116 | 2      | 0.46             | 0.60               | 0.43           | 0.80    | Conserved hypothetical protein                              | conserved hypothetical protein                                   |
| PM00117 | 2      | 2.10             | 0.18               | 0.13           | 0.01    | Conserved hypothetical protein                              | conserved hypothetical protein                                   |
| PM00120 | 2      | 1.65             | 1.06               | 0.75           | 0.11    | Cell division                                               | putative cell division inhibitor                                 |
| PM00121 | 2      | 0.59             | 0.43               | 0.30           | 0.76    | Conserved hypothetical protein                              | conserved hypothetical protein                                   |
| PM00123 | 2      | 0.65             | 0.62               | 0.44           | 1.00    | Serine family / Sulfur assimilation                         | O-acetylserine (thiol)-lyase A                                   |
| PM00124 | 2      | 1.03             | 1.55               | 1.10           | 0.85    | Conserved hypothetical protein                              | conserved hypothetical protein in cyanobacteria                  |
| PM00125 | 2      | -0.12            | 0.26               | 0.18           | 0.72    | Transport and binding proteins                              | possible ABC transporter, ATP-binding component                  |
| PM00126 | 2      | 0.52             | 0.49               | 0.34           | 0.85    | Other                                                       | possible Herpesvirus UL6 like                                    |
| PM00128 | 2      | 0.16             | 0.15               | 0.10           | 0.81    | Regulatory functions                                        | two-component response regulator                                 |
| PM00132 | 2      | -1.10            | 0.03               | 0.02           | 0.25    | Other                                                       | cyanobacterial conserved hypothetical                            |
| PM00133 | 2      | 2.05             | 0.32               | 0.23           | 0.02    | Radiation sensitivity                                       | putative DNA repair protein Rada                                 |
| PM00134 | 2      | -1.66            | 1.09               | 0.77           | 0.11    | Regulatory functions                                        | two-component response regulator                                 |
| PM00136 | 2      | -1.05            | 1.72               | 1.22           | 0.12    | Fatty acid, phospholipid and sterol metabolism              | 3-oxoacyl-[acyl-carrier-protein] synthase III                    |
| PM00137 | 2      | 0.32             | 0.41               | 0.29           | 0.91    | Fatty acid, phospholipid and sterol metabolism              | Malonyl coenzyme A-acyl carrier protein transacylase             |
| PM00138 | 2      | 0.66             | 0.03               | 0.02           | 0.86    | Fatty acid, phospholipid and sterol metabolism              | putative 1-acyl-sn-glycerol-3-phosphate acyltransferase          |
| PM00139 | 2      | -0.17            | 3.00               | 2.12           | 0.71    | Conserved hypothetical protein                              | conserved hypothetical protein                                   |
| PM00140 | 2      | Inf              | NA                 | NA             | 1.00    | Regulatory functions                                        | putative Yc34                                                    |
| PM00142 | 2      | #NAME?           | NA                 | NA             | 0.27    | Fatty acid, phospholipid and sterol metabolism              | RNA-binding region RNP-1 (RNA recognition motif)                 |
| PM00143 | 2      | 1.41             | 0.25               | 0.17           | 0.25    | Carotenoid                                                  | Squalene and phytoene synthases                                  |
| PM00144 | 2      | 1.68             | 0.41               | 0.29           | 0.19    | Carotenoid                                                  | phytoene desaturase                                              |
| PM00145 | 2      | 2.07             | 0.33               | 0.23           | 0.04    | Conserved hypothetical protein                              | conserved hypothetical protein                                   |
| PM00146 | 2      | 1.89             | 0.08               | 0.05           | 0.11    | Conserved hypothetical protein                              | conserved hypothetical protein                                   |
| PM00147 | 2      | -0.01            | 0.04               | 0.03           | 0.69    | Regulatory functions                                        | putative Rubisco transcriptional regulator                       |
| PM00149 | 2      | 0.91             | 0.12               | 0.08           | 1.00    | NADH dehydrogenase                                          | putative NADH Dehydrogenase (Complex I) subunit (chain 5)        |
| PM00150 | 2      | 1.71             | 0.10               | 0.07           | 0.19    | NADH dehydrogenase                                          | putative NADH dehydrogenase subunit (chain 4)                    |
| PM00153 | 2      | -1.82            | 0.65               | 0.46           | 0.03    | Conserved hypothetical protein                              | conserved hypothetical protein                                   |
| PM00154 | 2      | -0.58            | 0.29               | 0.21           | 0.42    | Regulatory functions                                        | Bacterial regulatory protein, LuxR family                        |
| PM00159 | 2      | 0.92             | 0.37               | 0.26           | 1.00    | NADH dehydrogenase                                          | putative NADH Dehydrogenase subunit                              |
| PM00160 | 2      | 2.66             | 0.59               | 0.42           | 0.00    | NADH dehydrogenase                                          | putative respiratory-chain NADH dehydrogenase subunit            |
| PM00163 | 2      | -0.73            | 0.05               | 0.04           | 0.49    | Conserved hypothetical protein                              | conserved hypothetical protein                                   |
| PM00164 | 2      | 1.56             | 0.36               | 0.26           | 0.28    | Aromatic amino acid family                                  | Tryptophan synthase, beta chain:Pyridoxal-5'-phosphate-depend... |
| PM00166 | 2      | -0.93            | 1.19               | 0.84           | 0.49    | Serine family / Sulfur assimilation                         | Adenylylsulfate kinase                                           |
| PM00172 | 2      | 1.24             | 0.37               | 0.26           | 0.34    | NADH dehydrogenase                                          | putative NADH dehydrogenase subunit                              |
| PM00179 | 2      | 1.26             | 1.73               | 1.22           | 0.95    | Other                                                       | Glutaredoxin                                                     |
| PM00180 | 2      | 0.54             | 1.74               | 1.23           | 1.00    | Protein modification and translation factors                | peptide chain release factor RF-2                                |
| PM00184 | 2      | 1.60             | 0.61               | 0.43           | 0.28    | Aromatic amino acid family                                  | para-aminobenzoate synthase component II                         |
| PM00195 | 2      | -0.11            | 1.01               | 0.72           | 0.66    | Other                                                       | Phosphoglycerate kinase                                          |
| PM00200 | 2      | -0.50            | 0.01               | 0.01           | 0.64    | Degradation of RNA                                          | possible ribonuclease HI                                         |
| PM00201 | 2      | -2.45            | 0.00               | 0.00           | 0.00    | Ribosomal proteins                                          | 50S ribosomal protein L7/L12                                     |
| PM00202 | 2      | -2.54            | 0.58               | 0.41           | 0.00    | Ribosomal proteins                                          | 50S ribosomal protein L10                                        |
| PM00203 | 2      | -2.46            | 0.22               | 0.16           | 0.00    | Ribosomal proteins                                          | 50S ribosomal protein L1                                         |
| PM00204 | 2      | -1.53            | 0.79               | 0.56           | 0.00    | Ribosomal proteins                                          | 50S ribosomal protein L11                                        |
| PM00205 | 2      | 1.15             | 0.38               | 0.27           | 0.71    | RNA synthesis, modification, and DNA transcription          | transcription antitermination protein, NusG                      |
| PM00206 | 2      | -1.11            | 0.31               | 0.22           | 0.24    | Protein and peptide secretion                               | putative preprotein translocase, SecE subunit                    |
| PM00208 | 2      | -0.04            | 0.84               | 0.60           | 0.78    | Other                                                       | Enolase                                                          |
| PM00209 | 2      | -0.83            | 0.94               | 0.66           | 0.34    | Other                                                       | possible kinase                                                  |
| PM00211 | 2      | 0.33             | 0.88               | 0.63           | 0.76    | Other                                                       | FAD-dependent pyridine nucleotide-disulphide oxidoreductase      |
| PM00212 | 2      | 3.02             | 0.23               | 0.16           | 0.00    | Conserved hypothetical protein                              | conserved hypothetical protein                                   |
| PM00213 | 2      | 2.02             | 0.33               | 0.24           | 0.01    | Transport and binding proteins                              | putative sodium-dependent bicarbonate transporter                |
| PM00214 | 2      | -2.59            | 0.49               | 0.35           | 0.00    | Regulatory functions                                        | putative sulfate transporter                                     |
| PM00216 | 2      | #NAME?           | NA                 | NA             | 0.23    | Adaptations and atypical conditions                         | Glyoxalase/Bleomycin resistance protein/Dioxygenase superfamily  |
| PM00218 | 2      | -0.12            | 0.22               | 0.15           | 0.65    | Other                                                       | GTP1/OBG family                                                  |
| PM00219 | 2      | 0.17             | 0.57               | 0.40           | 0.86    | Conserved hypothetical protein                              | conserved hypothetical                                           |
| PM00220 | 2      | 1.95             | 0.05               | 0.03           | 1.00    | Other                                                       | No Cyanobase Name                                                |
| PM00223 | 2      | 2.84             | 0.21               | 0.15           | 0.08    | Photosystem II                                              | Photosystem II PsbA protein (D1)                                 |
| PM00224 | 2      | 1.54             | 0.84               | 0.59           | 0.17    | Aromatic amino acid family                                  | Chlorisate synthase                                              |
| PM00225 | 2      | 0.03             | 0.78               | 0.53           | 0.65    | Cell division                                               | cell division protein FisH2                                      |
| PM00228 | 2      | -0.40            | 1.40               | 0.99           | 0.42    | Photosystem II                                              | Photosystem II manganese-stabilizing protein                     |
| PM00231 | 2      | -1.01            | 1.50               | 1.06           | 1.00    | Conserved hypothetical protein                              | conserved hypothetical protein                                   |
| PM00235 | 2      | 0.98             | 1.50               | 1.06           | 0.30    | Aminoacyl tRNA synthetases and tRNA modification            | Glutamyl-tRNA(Gln) amidotransferase subunit C                    |
| PM00237 | 2      | -0.30            | 1.41               | 1.00           | 0.67    | Conserved hypothetical protein                              | conserved hypothetical protein                                   |

|         |   |       |      |      |                                                         |                                                                                |
|---------|---|-------|------|------|---------------------------------------------------------|--------------------------------------------------------------------------------|
| PMMQ239 | 2 | -1.41 | 0.03 | 0.02 | 0.08 Conserved hypothetical protein                     | conserved hypothetical protein                                                 |
| PMMQ242 | 2 | 0.33  | 0.70 | 0.50 | 1.00 Thiamine                                           | thioredoxin-like protein TxIA                                                  |
| PMMQ243 | 2 | 0.45  | 0.94 | 0.67 | 0.80 Pyrimidine ribonucleotide biosynthesis             | possible Thy1 protein homolog                                                  |
| PMMQ244 | 2 | 0.71  | 0.11 | 0.08 | 1.00 Purine ribonucleotide biosynthesis                 | dCTP Deaminase                                                                 |
| PMMQ245 | 2 | 1.73  | 0.81 | 0.57 | 0.08 Cobalamin, heme, phycobilin and porphyrin          | cob[II]alamin adenosyltransferase                                              |
| PMMQ246 | 2 | 1.71  | 1.10 | 0.10 | 0.26 Transport and binding proteins                     | Globular nitrogen regulatory protein, CRP family of transcriptional regulators |
| PMMQ251 | 2 | -2.46 | 0.06 | 0.04 | 0.00 Photosystem II                                     | Photosystem II PsbH protein                                                    |
| PMMQ252 | 2 | 1.68  | 0.27 | 0.19 | 0.30 Photosystem II                                     | Photosystem II reaction centre N protein (psbN)                                |
| PMMQ253 | 2 | 0.53  | 0.24 | 0.17 | 0.64 Photosystem II                                     | photosystem II reaction center PsbI protein                                    |
| PMMQ254 | 2 | 0.59  | 1.24 | 0.88 | 1.00 Conserved hypothetical protein                     | conserved hypothetical protein                                                 |
| PMMQ258 | 2 | 1.89  | 0.96 | 0.68 | 0.03 Other                                              | Serine hydroxymethyltransferase (SHMT)                                         |
| PMMQ259 | 2 | 0.56  | 1.64 | 1.16 | 0.64 Conserved hypothetical protein                     | conserved hypothetical protein                                                 |
| PMMQ260 | 2 | 1.47  | 1.58 | 1.12 | 0.50 Conserved hypothetical protein                     | conserved hypothetical protein                                                 |
| PMMQ263 | 2 | 2.27  | 0.09 | 0.07 | 1.00 Transport and binding proteins                     | Ammonium transporter family                                                    |
| PMMQ264 | 2 | -1.80 | 0.22 | 0.16 | 0.01 Murein sacculus and peptidoglycan                  | LytB protein homolog                                                           |
| PMMQ265 | 2 | -0.66 | 0.23 | 0.16 | 0.49 Conserved hypothetical protein                     | conserved hypothetical protein                                                 |
| PMMQ267 | 2 | -1.81 | 1.02 | 0.72 | 0.11 Other                                              | probable esterase                                                              |
| PMMQ268 | 2 | -0.25 | 0.13 | 0.09 | 0.92 Conserved hypothetical protein                     | conserved hypothetical protein                                                 |
| PMMQ272 | 2 | -3.34 | 0.67 | 0.47 | 0.00 Photosystem II                                     | Photosystem II protein PsbK                                                    |
| PMMQ273 | 2 | -1.81 | 1.74 | 1.23 | 0.04 Other                                              | probable oxidoreductase                                                        |
| PMMQ275 | 2 | 0.11  | 0.33 | 0.23 | 0.88 Pyrimidine ribonucleotide biosynthesis             | Orotate phosphoribosyltransferase                                              |
| PMMQ278 | 2 | -0.13 | 0.00 | 0.00 | 0.75 Other                                              | Phosphotransferase superclass                                                  |
| PMMQ279 | 2 | -1.18 | 0.45 | 0.32 | 0.26 Conserved hypothetical protein                     | conserved hypothetical protein                                                 |
| PMMQ282 | 2 | -0.17 | 1.35 | 0.95 | 0.52 Fatty acid, phospholipid and sterol metabolism     | enoyl-[acyl-carrier-protein] reductase                                         |
| PMMQ284 | 2 | -1.60 | 0.92 | 0.65 | 0.00 Regulatory functions                               | putative pleiotropic regulatory protein                                        |
| PMMQ286 | 2 | 0.02  | 0.87 | 0.62 | 0.80 Other                                              | NUDIX hydrolase                                                                |
| PMMQ289 | 2 | 1.44  | 0.76 | 0.54 | 0.29 Transport and binding proteins                     | possible ABC transporter                                                       |
| PMMQ290 | 2 | 0.90  | 0.81 | 0.57 | 0.71 Transport and binding proteins                     | possible ABC transporter, ATP binding component                                |
| PMMQ293 | 2 | 1.41  | 0.02 | 0.01 | 0.45 NADH dehydrogenase                                 | putative respiratory-chain NADH dehydrogenase subunit                          |
| PMMQ294 | 2 | 1.69  | 0.23 | 0.16 | 0.21 NADH dehydrogenase                                 | putative NADH Dehydrogenase (complex I) subunit (chain 3)                      |
| PMMQ295 | 2 | -1.27 | 1.33 | 0.94 | 0.45 Other                                              | probable rubredoxin                                                            |
| PMMQ296 | 2 | -1.61 | 0.86 | 0.61 | 0.05 Conserved hypothetical protein                     | conserved hypothetical protein                                                 |
| PMMQ297 | 2 | -0.21 | 0.12 | 0.08 | 0.81 Photosystem II                                     | Cytochrome b559 alpha-subunit                                                  |
| PMMQ298 | 2 | -0.10 | 0.05 | 0.03 | 0.85 Photosystem II                                     | Cytochrome b559 beta-subunit                                                   |
| PMMQ299 | 2 | -0.06 | 0.22 | 0.15 | 0.69 Photosystem II                                     | photosystem II PsbL protein                                                    |
| PMMQ300 | 2 | -0.32 | 0.43 | 0.30 | 0.54 Photosystem II                                     | photosystem II PsbJ protein                                                    |
| PMMQ301 | 2 | 1.36  | 0.45 | 0.32 | 0.41 Other                                              | 5'-methylthioadenosine phosphorylase                                           |
| PMMQ305 | 2 | -1.72 | 1.40 | 0.99 | 0.00 Phycobilisome                                      | Phycobilisome protein                                                          |
| PMMQ306 | 2 | -3.32 | 0.23 | 0.16 | 0.00 Phycobilisome                                      | phycocystin linker protein CpeS homolog                                        |
| PMMQ307 | 2 | -3.12 | 0.51 | 0.36 | 0.00 Conserved hypothetical protein                     | hypothetical                                                                   |
| PMMQ308 | 2 | -0.12 | 0.26 | 0.19 | 0.71 Conserved hypothetical protein                     | conserved hypothetical protein                                                 |
| PMMQ309 | 2 | 1.57  | 1.52 | 1.08 | 0.19 Other                                              | possible Pollen allergen                                                       |
| PMMQ311 | 2 | -1.49 | 0.32 | 0.23 | 0.02 Aspartate family                                   | S-adenosylmethionine synthetase                                                |
| PMMQ312 | 2 | -2.38 | 0.00 | 0.00 | 0.00 Ribosomal proteins                                 | 30S ribosomal protein S1, homolog A                                            |
| PMMQ313 | 2 | -0.66 | 0.38 | 0.27 | 0.64 Conserved hypothetical protein                     | conserved hypothetical protein                                                 |
| PMMQ314 | 2 | -1.63 | 0.35 | 0.25 | 0.01 Photosystem II                                     | Photosystem II PsbT protein                                                    |
| PMMQ315 | 2 | -1.13 | 0.30 | 0.21 | 0.96 Photosystem II                                     | Photosystem II PsbB protein (CP47)                                             |
| PMMQ316 | 2 | 0.89  | 0.80 | 0.57 | 0.99 Soluble electron carriers                          | possible ferredoxin                                                            |
| PMMQ317 | 2 | -1.40 | 2.09 | 1.48 | 0.00 Photosystem II                                     | possible Photosystem II reaction center M protein (PsbM)                       |
| PMMQ318 | 2 | -0.98 | 1.65 | 1.17 | 0.03 Cobalamin, heme, phycobilin and porphyrin          | putative protein methyltransferase                                             |
| PMMQ321 | 2 | 0.28  | 0.31 | 0.22 | 1.00 Cell division                                      | putative septum site-determining protein MinD                                  |
| PMMQ324 | 2 | -0.14 | 0.98 | 0.69 | 1.00 Detoxification                                     | PDZ domain (also known as DHR or GLGF):Tail specific protease...               |
| PMMQ325 | 2 | -0.41 | 0.72 | 0.51 | 0.88 Cytochrome b6/f complex                            | Cytochrome b6                                                                  |
| PMMQ326 | 2 | 0.62  | 0.76 | 0.54 | 0.97 Cytochrome b6/f complex                            | PetD protein (subunit IV of the Cytochrome b6f complex)                        |
| PMMQ327 | 2 | -0.43 | 0.08 | 0.06 | 0.51 Other                                              | putative neutral invertase-like protein                                        |
| PMMQ328 | 2 | -0.86 | 0.20 | 0.14 | 0.42 DNA replication, recombination, and repair         | Formamidopyrimidine-DNA glycolase (FAPY-DNA glycolase)                         |
| PMMQ329 | 2 | -2.52 | 0.13 | 0.09 | 0.00 Photosystem I                                      | Photosystem I PsaE protein (subunit IV)                                        |
| PMMQ333 | 2 | 0.16  | 0.60 | 0.42 | 0.79 Other                                              | GCNS-related N-acetyltransferase                                               |
| PMMQ334 | 2 | 4.37  | 0.06 | 0.04 | 0.00 Conserved hypothetical protein                     | conserved hypothetical protein                                                 |
| PMMQ336 | 2 | 2.32  | 0.39 | 0.27 | 0.00 Conserved hypothetical protein                     | conserved hypothetical protein                                                 |
| PMMQ337 | 2 | 8.66  | 0.91 | 0.64 | 0.00 Conserved hypothetical protein                     | conserved hypothetical protein                                                 |
| PMMQ338 | 2 | 0.42  | 2.04 | 1.44 | 1.00 Conserved hypothetical protein                     | conserved hypothetical protein                                                 |
| PMMQ339 | 2 | 1.25  | 0.88 | 0.62 | 0.63 Carotenoid                                         | Bacterial-type phytoene dehydrogenase                                          |
| PMMQ341 | 2 | 2.10  | 0.55 | 0.39 | 0.01 Conserved hypothetical protein                     | conserved hypothetical protein                                                 |
| PMMQ342 | 2 | 1.61  | 0.48 | 0.34 | 0.12 Other                                              | possible Helper component proteinase                                           |
| PMMQ343 | 2 | 1.49  | 1.27 | 0.90 | 0.20 Other                                              | mttA/Hcf106 family                                                             |
| PMMQ345 | 2 | -0.84 | 0.07 | 0.05 | 0.29 Transport and binding proteins                     | putative bacterioferritin comigratory protein                                  |
| PMMQ346 | 2 | -4.87 | 1.50 | 1.06 | 0.00 Conserved hypothetical protein                     | conserved hypothetical protein                                                 |
| PMMQ347 | 2 | -0.58 | 0.37 | 0.26 | 0.52 Conserved hypothetical protein                     | conserved hypothetical protein                                                 |
| PMMQ348 | 2 | -2.28 | 0.25 | 0.18 | 0.05 Other                                              | possible Spectrin repeat                                                       |
| PMMQ350 | 2 | -0.67 | 0.53 | 0.38 | 1.00 Regulatory functions                               | possible TIR domain                                                            |
| PMMQ351 | 2 | inf   | NA   | NA   | 0.22 Cobalamin, heme, phycobilin and porphyrin          | possible Small, acid-soluble spore proteins, a                                 |
| PMMQ356 | 2 | -1.54 | 0.83 | 0.59 | 0.11 Fatty acid, phospholipid and sterol metabolism     | Alpha/beta hydrolase fold-Esterase/lipase/rhoesterase family...                |
| PMMQ363 | 2 | 1.46  | 0.07 | 0.05 | 0.22 Regulatory functions                               | possible MarR family                                                           |
| PMMQ364 | 2 | 3.43  | 0.56 | 0.39 | 0.00 Other                                              | possible Malic enzyme                                                          |
| PMMQ365 | 2 | 4.49  | 0.36 | 0.26 | 0.00 Other                                              | possible DsrE-like protein                                                     |
| PMMQ366 | 2 | 1.17  | 0.09 | 0.07 | 0.39 Transport and binding proteins                     | Type-1 copper (blue) domain                                                    |
| PMMQ367 | 2 | 1.30  | 0.97 | 0.68 | 0.74 Conserved hypothetical protein                     | conserved hypothetical protein                                                 |
| PMMQ368 | 2 | 2.72  | 1.12 | 0.79 | 0.00 Conserved hypothetical protein                     | conserved hypothetical protein                                                 |
| PMMQ370 | 2 | 3.85  | 0.60 | 0.42 | 0.00 Transport and binding proteins                     | putative cyanate ABC transporter, substrate binding protein                    |
| PMMQ371 | 2 | 0.52  | 0.67 | 0.47 | 0.69 Transport and binding proteins                     | putative cyanate ABC transporter                                               |
| PMMQ373 | 2 | 1.71  | 0.48 | 0.34 | 0.22 Other                                              | Cyanate lyase                                                                  |
| PMMQ374 | 2 | 1.55  | 1.44 | 1.02 | 0.43 Other                                              | mttA/Hcf106 family                                                             |
| PMMQ377 | 2 | 1.81  | 0.00 | 0.00 | 0.06 Conserved hypothetical protein                     | hypothetical                                                                   |
| PMMQ378 | 2 | 2.07  | 1.02 | 0.72 | 0.71 Conserved hypothetical protein                     | conserved hypothetical protein                                                 |
| PMMQ379 | 2 | -0.31 | 1.17 | 0.83 | 0.87 Conserved hypothetical protein                     | hypothetical                                                                   |
| PMMQ383 | 2 | 1.86  | 0.29 | 0.20 | 0.17 Transport and binding proteins                     | probable periplasmic protein                                                   |
| PMMQ388 | 2 | 0.32  | 1.33 | 0.94 | 1.00 Chemotaxis                                         | putative similar to tRNA-(MS[2]O[6]A)-hydroxylase                              |
| PMMQ395 | 2 | 1.05  | 0.97 | 0.69 | 0.90 Conserved hypothetical protein                     | conserved hypothetical protein                                                 |
| PMMQ400 | 2 | -0.86 | 0.67 | 0.47 | 0.48 Adaptations and atypical conditions                | light repressed protein A homolog                                              |
| PMMQ403 | 2 | -0.02 | 0.70 | 0.50 | 0.70 Conserved hypothetical protein                     | conserved hypothetical protein                                                 |
| PMMQ405 | 2 | -0.15 | 0.36 | 0.26 | 0.66 Transport and binding proteins                     | Dihydrolipamide acetyltransferase component (E2) of pyruvate de                |
| PMMQ407 | 2 | 0.01  | 0.49 | 0.35 | 0.87 Serine family / Sulfur assimilation                | O-acetylserine (thiol)-lyase A                                                 |
| PMMQ410 | 2 | -2.04 | 0.69 | 0.49 | 0.00 Ribosomal proteins                                 | 30S ribosomal protein S4                                                       |
| PMMQ411 | 2 | 0.75  | 0.21 | 0.15 | 0.75 Conserved hypothetical protein                     | conserved hypothetical protein                                                 |
| PMMQ412 | 2 | 1.30  | 0.07 | 0.05 | 0.28 Conserved hypothetical protein                     | conserved hypothetical protein                                                 |
| PMMQ416 | 2 | -1.60 | 0.14 | 0.10 | 0.02 RNA synthesis, modification, and DNA transcription | SAM (and some other nucleotide) binding motif:Generic methyl-...               |
| PMMQ417 | 2 | -0.42 | 0.59 | 0.42 | 0.71 Conserved hypothetical protein                     | hypothetical                                                                   |
| PMMQ418 | 2 | 0.70  | 1.72 | 1.22 | 0.33 Other                                              | NiFu-like protein                                                              |
| PMMQ428 | 2 | -1.92 | 0.78 | 0.56 | 0.00 Cobalamin, heme, phycobilin and porphyrin          | chlorophyll synthase 33 kD subunit                                             |
| PMMQ429 | 2 | -2.60 | 0.53 | 0.38 | 0.00 Conserved hypothetical protein                     | conserved hypothetical protein                                                 |
| PMMQ435 | 2 | -0.26 | 0.18 | 0.12 | 0.59 NADH dehydrogenase                                 | putative NADH dehydrogenase (complex I) subunit (chain 2)                      |
| PMMQ436 | 2 | 0.95  | 0.65 | 0.36 | 1.00 DNA replication, recombination, and repair         | Prokaryotic DNA topoisomerase                                                  |
| PMMQ441 | 2 | 1.07  | 0.92 | 0.65 | 0.40 Other                                              | Aldo/keto reductase family                                                     |
| PMMQ443 | 2 | 0.90  | 1.06 | 0.75 | 0.56 Conserved hypothetical protein                     | conserved hypothetical protein                                                 |
| PMMQ445 | 2 | 0.89  | 0.00 | 0.00 | 0.96 Respiratory terminal oxidases                      | Cytochrome c oxidase, subunit I                                                |
| PMMQ446 | 2 | 2.49  | 0.60 | 0.43 | 0.00 Respiratory terminal oxidases                      | putative cytochrome c oxidase, subunit 2                                       |
| PMMQ447 | 2 | 4.49  | 0.09 | 0.06 | 0.00 Conserved hypothetical protein                     | conserved hypothetical protein                                                 |
| PMMQ448 | 2 | 0.26  | 0.87 | 0.62 | 0.66 Cobalamin, heme, phycobilin and porphyrin          | putative protoheme IX farnesyltransferase                                      |
| PMMQ451 | 2 | 2.23  | 0.85 | 0.60 | 0.00 Other                                              | possible Arenavirus glycoprotein                                               |
| PMMQ452 | 2 | -2.16 | 0.75 | 0.53 | 0.00 Chaperones                                         | GroEL2 protein (Chaperonin cpn60 2)                                            |
| PMMQ453 | 2 | -4.26 | 1.63 | 1.15 | 0.00 Fatty acid, phospholipid and sterol metabolism     | 3-oxoacyl-[acyl-carrier protein] reductase                                     |
| PMMQ461 | 2 | 0.00  | 0.45 | 0.32 | 0.76 Cytochrome b6/f complex                            | Cytochrome f                                                                   |
| PMMQ462 | 2 | -0.94 | 0.26 | 0.18 | 0.15 Cytochrome b6/f complex                            | Rieske iron-sulfur protein                                                     |
| PMMQ465 | 2 | 0.10  | 0.30 | 0.21 | 0.84 Conserved hypothetical protein                     | hypothetical                                                                   |
| PMMQ468 | 2 | -3.46 | 1.84 | 1.30 | 0.00 Photosystem I                                      | Photosystem I PsaJ protein (subunit IX)                                        |
| PMMQ469 | 2 | -2.40 | 0.57 | 0.40 | 0.00 Photosystem I                                      | Photosystem I PsaF protein (subunit III)                                       |
| PMMQ470 | 2 | -0.31 | 0.10 | 0.07 | 0.64 Other                                              | probable o-sialoglycoprotein endopeptidase                                     |

|        |       |           |      |                                                 |                                                           |                                                                         |
|--------|-------|-----------|------|-------------------------------------------------|-----------------------------------------------------------|-------------------------------------------------------------------------|
| PM0471 | 2     | -0.85     | 0.35 | 0.25                                            | 0.39 Adaptations and atypical conditions                  | possible high light inducible protein                                   |
| PM0472 | 2     | -0.12     | 0.67 | 0.48                                            | 0.75 Transport and binding proteins                       | putative Na <sup>+</sup> /H <sup>+</sup> antiporter, CPA1 family        |
| PM0473 | 2     | -0.48     | 0.04 | 0.03                                            | 0.55 Aminoacyl tRNA synthetases and tRNA modification     | Glutamyl-tRNA synthetase                                                |
| PM0474 | 2     | -1.19     | 0.30 | 0.21                                            | 0.22 Conserved hypothetical protein                       | Conserved hypothetical protein                                          |
| PM0475 | 2     | -1.10     | 0.14 | 0.10                                            | 0.08 Ribosomal proteins                                   | Ribosomal protein L19                                                   |
| PM0476 | 2     | -1.15     | 0.35 | 0.24                                            | 0.40 Conserved hypothetical protein                       | conserved hypothetical protein                                          |
| PM0477 | 2     | -0.42     | 0.39 | 0.27                                            | 0.90 Protein modification and translation factors         | putative methionine aminopeptidase                                      |
| PM0478 | 2     | -4.19     | 0.45 | 0.32                                            | 0.00 Conserved hypothetical protein                       | conserved hypothetical protein                                          |
| PM0479 | 2     | -0.28     | 1.31 | 0.92                                            | 0.57 Conserved hypothetical protein                       | conserved hypothetical protein                                          |
| PM0480 | 2     | 2.40      | 0.74 | 0.52                                            | 0.01 Conserved hypothetical protein                       | conserved hypothetical protein                                          |
| PM0481 | 2     | -0.92     | 0.02 | 0.01                                            | 0.39 Conserved hypothetical protein                       | conserved hypothetical protein                                          |
| PM0482 | 2     | 1.62      | 1.26 | 0.89                                            | 0.36 Other                                                | Band 7 protein                                                          |
| PM0483 | 2     | -0.60     | 0.41 | 0.29                                            | 0.37 Cobalamin, heme, phycobilin and porphyrin            | glutamate-1-semialdehyde 2,1-aminomutase                                |
| PM0485 | 2 NA  | NA        | NA   | 0.95 Conserved hypothetical protein             | conserved hypothetical protein                            |                                                                         |
| PM0491 | 2     | 3.43      | 1.29 | 0.91                                            | 0.00 Other                                                | 4a-hydroxytetrahydrobiopterin dehydratase (PCD)                         |
| PM0492 | 2     | -2.45     | 1.34 | 0.94                                            | 0.02 Conserved hypothetical protein                       | conserved hypothetical protein                                          |
| PM0493 | 2     | -0.16     | 1.90 | 1.34                                            | 0.44 Other                                                | Carboxypeptidase Tac (M32) metallopeptidase                             |
| PM0494 | 2     | -1.78     | 0.31 | 0.22                                            | 0.03 Phosphorus compounds                                 | putative inorganic pyrophosphatase                                      |
| PM0495 | 2     | 0.59      | 1.73 | 1.22                                            | 1.00 Cobalamin, heme, phycobilin and porphyrin            | Porphobilinogen deaminase                                               |
| PM0496 | 2     | -0.15     | 0.09 | 0.07                                            | 0.64 RNA synthesis, modification, and DNA transcription   | Putative principal RNA polymerase sigma factor                          |
| PM0500 | 2     | -0.25     | 1.12 | 0.79                                            | 0.50 Conserved hypothetical protein                       | conserved hypothetical protein                                          |
| PM0501 | 2     | -0.96     | 1.14 | 0.81                                            | 0.96 Conserved hypothetical protein                       | conserved hypothetical protein                                          |
| PM0502 | 2     | 2.45      | 0.07 | 0.05                                            | 0.00 Conserved hypothetical protein                       | conserved hypothetical protein                                          |
| PM0503 | 2     | -1.94     | 1.91 | 1.35                                            | 0.22 Cobalamin, heme, phycobilin and porphyrin            | possible precorrin-6X reductase                                         |
| PM0506 | 2     | 0.07      | 1.07 | 0.75                                            | 0.73 Purine ribonucleotide biosynthesis                   | Adenylosuccinate synthetase                                             |
| PM0507 | 2     | 0.90      | 1.01 | 0.71                                            | 1.00 Photosystem II                                       | possible Photosystem II reaction center Psb27 protein                   |
| PM0508 | 2     | -0.61     | 0.36 | 0.24                                            | 0.54 Aminoacyl tRNA synthetases and tRNA modification     | Prolyl-tRNA synthetase                                                  |
| PM0510 | 2     | -1.85     | 0.08 | 0.06                                            | 0.00 Transposon-related functions                         | possible Reverse transcriptase (RNA-dependent)                          |
| PM0511 | 2     | -1.76     | 0.27 | 0.19                                            | 0.01 Other                                                | Inorganic pyrophosphatase                                               |
| PM0515 | 2     | -0.56     | 0.52 | 0.37                                            | 0.56 Cobalamin, heme, phycobilin and porphyrin            | possible alpha-ribazole-5'-P phosphatase                                |
| PM0519 | 2     | 1.76      | 0.38 | 0.27                                            | 0.12 Other                                                | Transaldolase                                                           |
| PM0520 | 2     | -1.27     | 1.17 | 0.82                                            | 0.13 Other                                                | NAD binding site                                                        |
| PM0522 | 2     | -0.84     | 0.74 | 0.52                                            | 0.28 Pyrimidine ribonucleotide biosynthesis               | uridylylate kinase                                                      |
| PM0525 | 2     | -1.01     | 1.62 | 1.14                                            | 0.09 Other                                                | Ferrochelatase                                                          |
| PM0526 | 2     | 0.36      | 0.24 | 0.17                                            | 0.78 Branched chain family                                | Acetolactate synthase large subunit                                     |
| PM0530 | 2     | 0.23      | 0.88 | 0.62                                            | 0.76 Ribosomal proteins                                   | 30S ribosomal protein S1 homolog B, putative Nbp1                       |
| PM0532 | 2     | 0.72      | 1.20 | 0.85                                            | 0.55 Conserved hypothetical protein                       | conserved hypothetical protein                                          |
| PM0533 | 2     | -0.73     | 0.69 | 0.49                                            | 0.42 Conserved hypothetical protein                       | conserved hypothetical protein                                          |
| PM0534 | 2     | -1.64     | 1.53 | 1.08                                            | 0.05 Fatty acid, phospholipid and sterol metabolism       | acetyl-CoA carboxylase, alpha subunit                                   |
| PM0536 | 2     | -1.40     | 1.02 | 0.72                                            | 0.18 Folic acid                                           | putative GTP cyclohydrolase I                                           |
| PM0537 | 2     | 0.07      | 0.17 | 0.12                                            | 0.92 Aromatic amino acid family                           | phosphoribosylanthranilate isomerase                                    |
| PM0540 | 2     | -3.39     | 1.74 | 1.23                                            | 0.00 Photosystem I                                        | possible photosystem I reaction centre subunit XII (PsaM)               |
| PM0541 | 2     | 0.38      | 0.04 | 0.03                                            | 0.91 Conserved hypothetical protein                       | conserved hypothetical protein                                          |
| PM0543 | 2     | -0.15     | 0.23 | 0.16                                            | 0.86 Cobalamin, heme, phycobilin and porphyrin            | Protochlorophyllide reductase iron-sulfur ATP-binding protein           |
| PM0544 | 2     | 0.48      | 0.72 | 0.51                                            | 0.81 Cobalamin, heme, phycobilin and porphyrin            | Light-independent protochlorophyllide reductase subunit B               |
| PM0545 | 2     | -0.29     | 0.05 | 0.03                                            | 1.00 Cobalamin, heme, phycobilin and porphyrin            | Light-independent protochlorophyllide reductase subunit N               |
| PM0546 | 2     | 0.33      | 0.05 | 0.04                                            | 1.00 Conserved hypothetical protein                       | conserved hypothetical                                                  |
| PM0548 | 2     | 0.39      | 0.42 | 0.30                                            | 1.00 Other                                                | HAM1 family protein                                                     |
| PM0549 | 2     | -2.81     | 0.36 | 0.26                                            | 0.00 CO2 fixation                                         | carboxysome shell protein CsoS1                                         |
| PM0550 | 2     | -1.48     | 0.20 | 0.14                                            | 0.01 CO2 fixation                                         | Ribulose biphosphate carboxylase, large chain                           |
| PM0551 | 2     | -1.09     | 0.63 | 0.45                                            | 0.24 CO2 fixation                                         | Ribulose biphosphate carboxylase, small chain                           |
| PM0552 | 2     | -1.98     | 0.37 | 0.26                                            | 0.00 CO2 fixation                                         | carboxysome shell protein CsoS2                                         |
| PM0554 | 2     | -0.03     | 0.63 | 0.44                                            | 0.76 CO2 fixation                                         | putative carboxysome peptide A                                          |
| PM0555 | 2     | -0.13     | 0.46 | 0.32                                            | 0.70 CO2 fixation                                         | putative carboxysome peptide B                                          |
| PM0556 | 2 inf | NA        | NA   | 1.00 Conserved hypothetical protein             | conserved hypothetical protein                            |                                                                         |
| PM0557 | 2     | -1.75     | 0.03 | 0.02                                            | 0.03 Conserved hypothetical protein                       | conserved hypothetical                                                  |
| PM0558 | 2     | 1.33      | 1.00 | 0.71                                            | 0.30 Conserved hypothetical protein                       | conserved hypothetical protein                                          |
| PM0560 | 2     | -0.82     | 0.49 | 0.34                                            | 0.26 Other                                                | possible ATP phosphoribosyltransferase                                  |
| PM0561 | 2     | -0.69     | 1.18 | 0.83                                            | 0.35 Transport and binding proteins                       | putative multidrug efflux ABC transporter                               |
| PM0564 | 2     | -0.50     | 0.42 | 0.30                                            | 0.56 Conserved hypothetical protein                       | conserved hypothetical protein                                          |
| PM0565 | 2     | 1.90      | 0.49 | 0.34                                            | 0.07 DNA replication, recombination, and repair           | chromosomal replication initiator protein DnaA                          |
| PM0570 | 2     | 1.19      | 0.09 | 0.07                                            | 0.48 NADH dehydrogenase                                   | NADH dehydrogenase subunit NdhL (ndhL)                                  |
| PM0571 | 2     | 3.04      | 2.01 | 1.42                                            | 0.03 Conserved hypothetical protein                       | conserved hypothetical protein                                          |
| PM0573 | 2     | -0.59     | 0.28 | 0.20                                            | 0.45 Conserved hypothetical protein                       | conserved hypothetical protein                                          |
| PM0574 | 2     | 0.10      | 0.79 | 0.56                                            | 0.77 Conserved hypothetical protein                       | conserved hypothetical protein                                          |
| PM0577 | 2     | -0.12     | 0.52 | 0.37                                            | 0.83 RNA synthesis, modification, and DNA transcription   | Putative type II alternative sigma factor, sigma70 family               |
| PM0579 | 2     | 1.20      | 0.84 | 0.59                                            | 0.67 Conserved hypothetical protein                       | conserved hypothetical protein                                          |
| PM0580 | 2     | -0.41     | 1.22 | 0.87                                            | 0.48 Degradation of proteins, peptides, and glycopeptides | ATP-dependent Clp protease, Hsp 100, ATP-binding subunit ClpB           |
| PM0581 | 2     | -0.59     | 1.36 | 0.96                                            | 0.97 Soluble electron carriers                            | plastocyanin                                                            |
| PM0583 | 2     | -3.46     | 0.65 | 0.46                                            | 0.00 Cobalamin, heme, phycobilin and porphyrin            | Uroporphyrinogen decarboxylase (URO-D)                                  |
| PM0586 | 2     | -0.50     | 0.42 | 0.30                                            | 0.82 Conserved hypothetical protein                       | conserved hypothetical                                                  |
| PM0593 | 2     | 0.17      | 0.29 | 0.21                                            | 1.00 Other                                                | Peptidase family M3                                                     |
| PM0594 | 2     | -0.21     | 0.62 | 0.44                                            | 0.65 NADH dehydrogenase                                   | putative NADH Dehydrogenase (complex I) subunit (chain 4)               |
| PM0595 | 2     | 0.87      | 0.36 | 0.25                                            | 0.64 Aspartate family                                     | Homoserine kinase:GHP kinases putative ATP-binding domain               |
| PM0599 | 2     | -3.19     | 0.74 | 0.53                                            | 0.00 Conserved hypothetical protein                       | conserved hypothetical protein                                          |
| PM0601 | 2     | -0.70     | 0.62 | 0.44                                            | 0.45 Transport and binding proteins                       | ABC transporter, substrate binding protein, possibly Mn                 |
| PM0603 | 2     | -1.08     | 0.11 | 0.08                                            | 0.29 Transport and binding proteins                       | ABC transporter component, possibly Mn transport                        |
| PM0605 | 2     | -3.78     | 1.23 | 0.87                                            | 0.00 Conserved hypothetical protein                       | conserved hypothetical protein                                          |
| PM0609 | 2     | 0.22      | 0.57 | 0.40                                            | 0.86 Polysaccharides and glycoproteins                    | Putative ADPglucose-glucosyltransferase (GlgA)                          |
| PM0613 | 2     | -0.17     | 0.36 | 0.26                                            | 0.73 Aromatic amino acid family                           | EPSP synthase [3-phosphoshikimate 1-carboxyvinyltransferase)            |
| PM0614 | 2     | -2.22     | 0.60 | 0.42                                            | 0.00 Conserved hypothetical protein                       | conserved hypothetical protein                                          |
| PM0615 | 2     | -0.06     | 0.16 | 0.12                                            | 0.73 Other                                                | Possible nitrilase                                                      |
| PM0618 | 2     | 1.40      | 1.57 | 1.11                                            | 0.39 Carotenoid                                           | polyprenyl synthetase; solanelyl diphosphate synthase (sds)             |
| PM0619 | 2     | 0.80      | 0.24 | 0.17                                            | 0.94 Pyruvate and acetyl-CoA metabolism                   | acetyl-coenzyme A synthetase                                            |
| PM0622 | 2     | -0.12     | 1.22 | 0.86                                            | 0.67 Conserved hypothetical protein                       | conserved hypothetical protein                                          |
| PM0626 | 2     | 2.23      | 1.07 | 0.75                                            | 0.08 Conserved hypothetical protein                       | hypothetical                                                            |
| PM0627 | 2     | -1.00     | 0.53 | 0.38                                            | 0.94 Photosystem II                                       | light-harvesting complex protein                                        |
| PM0628 | 2     | 0.68      | 0.58 | 0.41                                            | 1.00 Transport and binding proteins                       | possible sodium:solute symporter, ESS family                            |
| PM0629 | 2     | -0.78     | 0.81 | 0.58                                            | 0.27 Conserved hypothetical protein                       | conserved hypothetical protein                                          |
| PM0633 | 2     | -2.08     | 2.45 | 1.73                                            | 0.00 Carotenoid                                           | putative lycopene epsilon cyclase                                       |
| PM0637 | 2     | -0.11     | 0.72 | 0.51                                            | 0.68 Regulatory functions                                 | Ferric uptake regulator family                                          |
| PM0638 | 2     | -1.10     | 0.68 | 0.48                                            | 0.36 Conserved hypothetical protein                       | conserved hypothetical protein                                          |
| PM0641 | 2     | -0.86     | 0.64 | 0.45                                            | 0.19 Conserved hypothetical protein                       | conserved hypothetical protein                                          |
| PM0642 | 2     | -0.82     | 0.26 | 0.18                                            | 0.42 Serine family / Sulfur assimilation                  | putative O-Acetyl homoserine sulphydrylase                              |
| PM0647 | 2     | 2.58      | 1.23 | 0.87                                            | 0.00 Conserved hypothetical protein                       | conserved hypothetical protein                                          |
| PM0649 | 2     | -2.37     | 0.25 | 0.18                                            | 0.00 Other                                                | Pentapeptide repeats                                                    |
| PM0651 | 2     | 0.04      | 0.38 | 0.27                                            | 0.75 Regulatory functions                                 | possible VHS domain                                                     |
| PM0652 | 2     | -1.06     | 0.17 | 0.12                                            | 0.30 RNA synthesis, modification, and DNA transcription   | possible 5'-3' exonuclease, C-terminal SAM fold                         |
| PM0658 | 2     | -1.28     | 1.48 | 1.05                                            | 0.56 Aminoacyl tRNA synthetases and tRNA modification     | putative pseudouridylylate synthase specific to ribosomal small subunit |
| PM0659 | 2     | -0.82     | 1.95 | 1.38                                            | 0.04 DNA replication, recombination, and repair           | NAD-dependent DNA ligase N-terminus                                     |
| PM0660 | 2     | 0.46      | 1.77 | 1.25                                            | 0.82 Degradation of RNA                                   | possible RNA recognition motif. (a.k.a. RRM, R                          |
| PM0661 | 2     | 1.76      | 0.08 | 0.05                                            | 0.14 Purine ribonucleotide biosynthesis                   | ribonucleotide reductase (Class II)                                     |
| PM0664 | 2     | 0.08      | 0.68 | 0.66                                            | 0.77 Conserved hypothetical protein                       | conserved hypothetical protein                                          |
| PM0665 | 2     | 0.24      | 0.84 | 0.59                                            | 0.83 Other                                                | Hsp33 protein                                                           |
| PM0667 | 2     | 2.73      | 0.95 | 0.67                                            | 0.00 Conserved hypothetical protein                       | conserved hypothetical protein                                          |
| PM0674 | 2     | -0.16     | 0.92 | 0.65                                            | 0.65 Aspartate family                                     | Aminotransferases class-I                                               |
| PM0681 | 2     | 1.66      | 0.37 | 0.26                                            | 0.10 Conserved hypothetical protein                       | conserved hypothetical protein                                          |
| PM0683 | 2     | 1.20      | 0.51 | 0.36                                            | 0.42 Purine ribonucleotide biosynthesis                   | phosphoribosylaminoimidazole carboxylase                                |
| PM0684 | 2     | 2.77      | 0.22 | 0.16                                            | 0.01 Regulatory functions                                 | possible Zinc finger, C2H2 type                                         |
| PM0685 | 2     | 3.20      | 0.55 | 0.39                                            | 0.00 Conserved hypothetical protein                       | hypothetical protein                                                    |
| PM0687 | 2     | 2.70      | 2.03 | 1.43                                            | 0.01 Conserved hypothetical protein                       | conserved hypothetical                                                  |
| PM0688 | 2     | 1.48      | 1.97 | 1.39                                            | 0.53 Protein modification and translation factors         | possible Elongation factor Tu domain 2                                  |
| PM0689 | 2     | 4.28      | 1.87 | 1.32                                            | 0.00 Adaptations and atypical conditions                  | possible high light inducible protein                                   |
| PM0690 | 2     | 0.08      | 0.93 | 0.66                                            | 0.00 Adaptations and atypical conditions                  | possible high light inducible protein                                   |
| PM0691 | 2 inf | NA        | NA   | 0.21 Conserved hypothetical protein             | conserved hypothetical protein                            |                                                                         |
| PM0692 | 2     | -0.85     | 0.06 | 0.04                                            | 1.00 Regulatory functions                                 | possible DDT domain                                                     |
| PM0693 | 2     | -0.15     | 0.51 | 0.36                                            | 0.73 Other                                                | possible Hepatitis C virus envelope glycoprotein                        |
| PM0697 | 2     | #NAME? NA | NA   | 1.00 DNA replication, recombination, and repair | possible D12 class N6 adenine-specific DNA met            |                                                                         |

|        |   |        |      |      |      |                                                           |                                                                                |
|--------|---|--------|------|------|------|-----------------------------------------------------------|--------------------------------------------------------------------------------|
| PM0698 | 2 | 0.69   | 0.64 | 0.45 | 0.71 | Chaperones                                                | possible DnaJ central domain (4 repeats)                                       |
| PM0699 | 2 | -4.82  | 0.86 | 0.61 | 0.00 | Conserved hypothetical protein                            | conserved hypothetical                                                         |
| PM0700 | 2 | -0.90  | 0.49 | 0.34 | 0.85 | Conserved hypothetical protein                            | conserved hypothetical protein                                                 |
| PM0703 | 2 | 1.18   | 1.07 | 0.75 | 0.33 | Conserved hypothetical protein                            | conserved hypothetical protein                                                 |
| PM0704 | 2 | 0.80   | 1.06 | 0.75 | 0.50 | Regulatory functions                                      | putative potassium channel, VIC family                                         |
| PM0705 | 2 | 1.30   | 1.77 | 1.25 | 0.47 | Regulatory functions                                      | two-component response regulator, phosphate                                    |
| PM0707 | 2 | 0.22   | 0.38 | 0.27 | 1.00 | Other                                                     | possible Lipoprotein                                                           |
| PM0708 | 2 | 1.56   | 0.48 | 0.34 | 0.25 | Regulatory functions                                      | putative secreted protein                                                      |
| PM0709 | 2 | 0.63   | 0.01 | 0.01 | 0.92 | Membranes, lipoproteins and porins                        | possible porin                                                                 |
| PM0710 | 2 | -3.05  | 0.17 | 0.12 | 0.00 | Transport and binding proteins                            | ABC transporter, substrate binding protein, phosphate                          |
| PM0714 | 2 | Inf    | NA   | NA   | 0.87 | Regulatory functions                                      | Bacterial regulatory proteins, ArsR family                                     |
| PM0717 | 2 | -1.20  | 0.63 | 0.45 | 0.19 | Conserved hypothetical protein                            | conserved hypothetical protein                                                 |
| PM0719 | 2 | -0.87  | 1.68 | 1.19 | 0.80 | Conserved hypothetical protein                            | hypothetical                                                                   |
| PM0722 | 2 | -0.80  | 0.14 | 0.10 | 1.00 | Conserved hypothetical protein                            | hypothetical                                                                   |
| PM0725 | 2 | 0.13   | 0.97 | 0.68 | 0.75 | Transport and binding proteins                            | putative phosphate ABC transporter, ATP binding subunit                        |
| PM0726 | 2 | 2.25   | 1.36 | 0.96 | 0.06 | Conserved hypothetical protein                            | hypothetical                                                                   |
| PM0732 | 2 | -0.23  | 1.11 | 0.78 | 0.79 | Other                                                     | possible Major surface glycoprotein                                            |
| PM0736 | 2 | 0.20   | 0.31 | 0.22 | 0.99 | Other                                                     | possible Alpha-2-macroglobulin family N-termin                                 |
| PM0739 | 2 | 0.53   | 0.32 | 0.23 | 1.00 | Conserved hypothetical protein                            | conserved hypothetical protein                                                 |
| PM0740 | 2 | -0.29  | 0.13 | 0.09 | 0.56 | Cytochrome b6/f complex                                   | Cytochrome b6-f complex subunit VIII                                           |
| PM0741 | 2 | -0.74  | 0.04 | 0.03 | 0.45 | Conserved hypothetical protein                            | conserved hypothetical protein                                                 |
| PM0742 | 2 | 1.04   | 0.18 | 0.13 | 0.71 | Degradation of proteins, peptides, and glycopeptides      | Clp protease subunit                                                           |
| PM0743 | 2 | -0.02  | 0.26 | 0.18 | 0.71 | Cell division                                             | FtsH ATP-dependent protease homolog                                            |
| PM0744 | 2 | -1.52  | 0.15 | 0.11 | 0.24 | Conserved hypothetical protein                            | conserved hypothetical protein                                                 |
| PM0747 | 2 | -3.03  | 1.73 | 1.22 | 0.00 | Cobalamin, heme, phycobilin and porphyrin                 | ferredoxin-dependent biliverdin reductase                                      |
| PM0751 | 2 | -2.72  | 0.08 | 0.06 | 0.00 | Conserved hypothetical protein                            | conserved hypothetical protein                                                 |
| PM0753 | 2 | -1.29  | 0.28 | 0.20 | 0.04 | Ribosomal proteins                                        | 30S ribosomal protein S2                                                       |
| PM0754 | 2 | 2.94   | 1.63 | 1.15 | 0.00 | Protein modification and translation factors              | putative Elongation factor Ts                                                  |
| PM0758 | 2 | 1.04   | 1.27 | 0.90 | 0.56 | Serine family / Sulfur assimilation                       | Ferredoxin-sulfite reductase                                                   |
| PM0760 | 2 | -0.59  | 0.17 | 0.12 | 0.50 | Cobalamin, heme, phycobilin and porphyrin                 | Aromatic-ring hydroxylase (flavoprotein monooxygenase)                         |
| PM0762 | 2 | -0.46  | 0.51 | 0.36 | 0.60 | Aromatic amino acid family                                | tyrosine binding protein                                                       |
| PM0766 | 2 | -1.92  | 1.09 | 0.77 | 0.00 | Other                                                     | Ribulose-phosphate 3-epimerase                                                 |
| PM0767 | 2 | -1.20  | 0.44 | 0.31 | 0.04 | Surface polysaccharides, lipopolysaccharides and antigens | Fructose-1,6-bisphosphatase/sedoheptulose-1,7-bis phosphatase                  |
| PM0769 | 2 | -1.61  | 0.44 | 0.31 | 0.00 | Other                                                     | ADP-glucose pyrophosphorylase                                                  |
| PM0770 | 2 | 2.53   | 1.04 | 0.74 | 0.00 | Pentose phosphate pathway                                 | 6-phosphogluconate dehydrogenase                                               |
| PM0772 | 2 | -0.52  | 1.14 | 0.80 | 0.70 | Conserved hypothetical protein                            | conserved hypothetical protein                                                 |
| PM0774 | 2 | 1.25   | 0.34 | 0.24 | 0.44 | Branched chain family                                     | Dihydroxy-acid dehydratase                                                     |
| PM0775 | 2 | -1.95  | 1.96 | 1.38 | 0.30 | Conserved hypothetical protein                            | conserved hypothetical protein                                                 |
| PM0777 | 2 | 0.55   | 1.16 | 0.82 | 0.85 | Conserved hypothetical protein                            | conserved hypothetical protein                                                 |
| PM0779 | 2 | 1.03   | 0.61 | 0.43 | 0.80 | Conserved hypothetical protein                            | conserved hypothetical protein                                                 |
| PM0781 | 2 | -1.55  | 0.45 | 0.32 | 0.01 | Fatty acid, phospholipid and sterol metabolism            | Fructose-bisphosphate/sedoheptulose-1,7-bisphosph ate aldolase                 |
| PM0784 | 2 | -1.99  | 0.82 | 0.58 | 0.00 | Fatty acid, phospholipid and sterol metabolism            | acetyl-CoA carboxylase, beta subunit                                           |
| PM0785 | 2 | -3.91  | 1.09 | 0.77 | 0.00 | CO2 fixation                                              | phosphoribulokinase                                                            |
| PM0790 | 2 | 1.21   | 0.10 | 0.07 | 0.35 | Conserved hypothetical protein                            | conserved hypothetical protein                                                 |
| PM0794 | 2 | 0.11   | 0.18 | 0.13 | 0.82 | Conserved hypothetical protein                            | conserved hypothetical protein                                                 |
| PM0797 | 2 | -2.25  | 0.92 | 0.65 | 0.00 | Nucleoproteins                                            | possible mRNA binding protein                                                  |
| PM0799 | 2 | -2.18  | 1.81 | 1.28 | 0.00 | Conserved hypothetical protein                            | conserved hypothetical protein                                                 |
| PM0800 | 2 | 0.63   | 1.46 | 1.03 | 0.64 | Conserved hypothetical protein                            | conserved hypothetical protein                                                 |
| PM0801 | 2 | -1.39  | 0.62 | 0.44 | 0.10 | Conserved hypothetical protein                            | conserved hypothetical protein                                                 |
| PM0802 | 2 | 0.97   | 1.80 | 1.27 | 1.00 | DNA replication, recombination, and repair                | putative endonuclease                                                          |
| PM0804 | 2 | 1.95   | 0.54 | 0.38 | 0.23 | Other                                                     | ferritin                                                                       |
| PM0806 | 2 | 1.36   | 0.49 | 0.35 | 0.38 | Regulatory functions                                      | Bacterial regulatory proteins, Crp family                                      |
| PM0810 | 2 | 1.79   | 0.81 | 0.57 | 0.01 | Conserved hypothetical protein                            | hypothetical                                                                   |
| PM0812 | 2 | 1.85   | 4.26 | 3.01 | 0.73 | Conserved hypothetical protein                            | hypothetical                                                                   |
| PM0814 | 2 | -1.40  | 0.13 | 0.09 | 0.04 | Other                                                     | possible Cytochrome oxidase c subunit Vtb                                      |
| PM0815 | 2 | 4.86   | 0.76 | 0.53 | 0.00 | Adaptations and atypical conditions                       | possible high light inducible protein                                          |
| PM0816 | 2 | 4.64   | 1.86 | 1.32 | 0.00 | Adaptations and atypical conditions                       | possible high light inducible protein                                          |
| PM0817 | 2 | 3.14   | 0.62 | 0.44 | 0.00 | Adaptations and atypical conditions                       | possible high light inducible protein                                          |
| PM0818 | 2 | 2.92   | 0.78 | 0.55 | 0.00 | Adaptations and atypical conditions                       | possible high light inducible protein                                          |
| PM0819 | 2 | 2.83   | 0.74 | 0.52 | 0.00 | Conserved hypothetical protein                            | hypothetical                                                                   |
| PM0820 | 2 | #NAME? | NA   | NA   | 0.00 | Aromatic amino acid family                                | possible EPS synthase [3-phosphoshikimate 1-c                                  |
| PM0821 | 2 | 0.61   | 0.49 | 0.35 | 0.97 | Conserved hypothetical protein                            | conserved hypothetical protein                                                 |
| PM0824 | 2 | 0.52   | 0.03 | 0.02 | 0.99 | Conserved hypothetical protein                            | conserved hypothetical protein                                                 |
| PM0828 | 2 | 0.87   | 0.28 | 0.20 | 0.10 | Other                                                     | S4 domain                                                                      |
| PM0829 | 2 | 0.69   | 0.64 | 0.46 | 0.94 | Other                                                     | Triosephosphate isomerase                                                      |
| PM0835 | 2 | -0.96  | 0.93 | 0.66 | 0.48 | Conserved hypothetical protein                            | conserved hypothetical protein                                                 |
| PM0844 | 2 | -1.58  | 0.41 | 0.29 | 0.07 | Adaptations and atypical conditions                       | phytochrome-regulated gene                                                     |
| PM0845 | 2 | 0.90   | 0.02 | 0.01 | 0.53 | Conserved hypothetical protein                            | conserved hypothetical protein                                                 |
| PM0846 | 2 | 0.43   | 0.52 | 0.37 | 1.00 | Other                                                     | possible Uncharacterized secreted proteins, Ya                                 |
| PM0847 | 2 | -0.03  | 1.46 | 1.03 | 0.98 | Drug and analog sensitivity                               | putative acetazolamide conferring resistance protein Zam                       |
| PM0851 | 2 | -0.54  | 0.62 | 0.46 | 0.26 | Other                                                     | Putative ClbY homolog                                                          |
| PM0852 | 2 | 2.60   | 1.49 | 1.05 | 0.01 | Conserved hypothetical protein                            | conserved hypothetical protein                                                 |
| PM0853 | 2 | -0.39  | 1.76 | 1.24 | 0.56 | Ribosomal proteins                                        | S0S ribosomal protein L32                                                      |
| PM0856 | 2 | -0.27  | 0.30 | 0.21 | 0.91 | Detoxification                                            | thioredoxin peroxidase                                                         |
| PM0857 | 2 | -2.45  | 0.26 | 0.19 | 0.00 | Other                                                     | possible influenza RNA-dependent RNA polymeras                                 |
| PM0858 | 2 | 2.89   | 0.21 | 0.15 | 0.00 | Conserved hypothetical protein                            | hypothetical                                                                   |
| PM0861 | 2 | -1.21  | 0.09 | 0.06 | 1.00 | Transport and binding proteins                            | possible Virion host shut-off protein                                          |
| PM0863 | 2 | -0.20  | 1.01 | 0.71 | 0.70 | Cobalamin, heme, phycobilin and porphyrin                 | putative cobinamide kinase                                                     |
| PM0864 | 2 | -1.70  | 1.77 | 1.25 | 0.04 | Other                                                     | possible Fusion glycoprotein F0.                                               |
| PM0867 | 2 | -0.48  | 0.82 | 0.58 | 0.64 | Aminoacyl tRNA synthetases and tRNA modification          | Methionyl-tRNA synthetase                                                      |
| PM0869 | 2 | -2.25  | 1.41 | 0.99 | 0.00 | Ribosomal proteins                                        | 30S Ribosomal protein S18                                                      |
| PM0870 | 2 | -2.68  | 1.09 | 0.77 | 0.00 | Ribosomal proteins                                        | S0S Ribosomal protein L33                                                      |
| PM0872 | 2 | -0.65  | 0.11 | 0.08 | 0.63 | Other                                                     | possible Carboxylesterase                                                      |
| PM0876 | 2 | -3.82  | 3.57 | 2.52 | 0.01 | Conserved hypothetical protein                            | conserved hypothetical                                                         |
| PM0878 | 2 | -1.03  | 0.69 | 0.49 | 0.42 | Branched chain family                                     | putative Branched-chain amino acid aminotransferase                            |
| PM0881 | 2 | 0.28   | 2.45 | 1.74 | 0.64 | Conserved hypothetical protein                            | conserved hypothetical protein                                                 |
| PM0883 | 2 | 0.64   | 0.37 | 0.26 | 0.95 | Conserved hypothetical protein                            | conserved hypothetical protein                                                 |
| PM0893 | 2 | -0.71  | 0.49 | 0.35 | 0.46 | Riboflavin                                                | possible GTP cyclohydrolase II / 3,4-dihydroxy-2-butanone 4-phosphate synthase |
| PM0894 | 2 | -0.87  | 0.02 | 0.01 | 0.22 | Protein modification and translation factors              | Cyclophilin-type peptidyl-prolyl cis-trans isomerase                           |
| PM0895 | 2 | #NAME? | NA   | NA   | 1.00 | Conserved hypothetical protein                            | conserved hypothetical protein                                                 |
| PM0896 | 2 | 1.03   | 1.73 | 1.22 | 1.00 | Chaperones                                                | DnaJ2 protein                                                                  |
| PM0897 | 2 | 0.59   | 0.22 | 0.15 | 1.00 | Chaperones                                                | Molecular chaperone DnaK, heat shock protein hsp70                             |
| PM0898 | 2 | -0.35  | 0.96 | 0.68 | 0.71 | Soluble electron carriers                                 | ferredoxin, petF-like protein                                                  |
| PM0899 | 2 | 1.39   | 0.34 | 0.24 | 0.23 | Regulatory functions                                      | Possible myo-inositol-1(or 4)-monophosphatase                                  |
| PM0901 | 2 | -2.15  | 1.13 | 0.80 | 0.00 | Chaperones                                                | heat shock protein HtpG                                                        |
| PM0902 | 2 | -1.17  | 0.03 | 0.02 | 0.19 | Ribosomal proteins                                        | S0S ribosomal protein L28                                                      |
| PM0906 | 2 | -0.14  | 2.19 | 1.55 | 0.46 | Photosystem I                                             | Photosystem I PsA protein (subunit X)                                          |
| PM0907 | 2 | -0.98  | 0.26 | 0.19 | 0.26 | Sugars                                                    | 1-deoxy-D-xylulose 5-phosphate synthase                                        |
| PM0910 | 2 | 1.74   | 1.17 | 0.83 | 0.20 | Conserved hypothetical protein                            | conserved hypothetical membrane protein                                        |
| PM0912 | 2 | 0.16   | 0.64 | 0.45 | 0.76 | Other                                                     | Pyruvate kinase                                                                |
| PM0913 | 2 | 1.06   | 0.06 | 0.04 | 0.45 | Transport and binding proteins                            | possible ABC transporter                                                       |
| PM0919 | 2 | 0.50   | 0.12 | 0.09 | 0.88 | Branched chain family                                     | serine:pyruvate/alanine:glyoxylate aminotransferase                            |
| PM0920 | 2 | 2.85   | 0.19 | 0.10 | 0.00 | Glutamate family / Nitrogen assimilation                  | Glutamine synthetase, glutamate-ammonia ligase                                 |
| PM0922 | 2 | 0.42   | 0.56 | 0.40 | 1.00 | Conserved hypothetical protein                            | conserved hypothetical protein                                                 |
| PM0923 | 2 | -4.63  | 2.06 | 1.46 | 0.00 | Conserved hypothetical protein                            | conserved hypothetical protein                                                 |
| PM0926 | 2 | -1.68  | 0.28 | 0.20 | 0.02 | Photosystem II                                            | possible Photosystem II reaction center Psb28 protein                          |
| PM0930 | 2 | -0.98  | 0.18 | 0.13 | 0.27 | Other                                                     | Pyruvate dehydrogenase E1 beta subunit                                         |
| PM0934 | 2 | -0.25  | 0.52 | 0.36 | 0.94 | Conserved hypothetical protein                            | conserved hypothetical protein                                                 |
| PM0936 | 2 | 0.36   | 0.65 | 0.46 | 1.00 | DNA replication, recombination, and repair                | putative SOS mutagenesis protein UmuD                                          |
| PM0941 | 2 | 0.66   | 0.41 | 0.29 | 0.91 | Other                                                     | possible cAMP phosphodiesterases class-II                                      |
| PM0942 | 2 | 0.93   | 0.45 | 0.32 | 0.69 | DNA replication, recombination, and repair                | putative holliday junction DNA helicase RuvA                                   |
| PM0943 | 2 | -2.32  | 1.41 | 1.00 | 0.04 | Ribosomal proteins                                        | 30S Ribosomal protein S15                                                      |
| PM0946 | 2 | -0.09  | 0.08 | 0.06 | 0.73 | Aminoacyl tRNA synthetases and tRNA modification          | Glutaryl-tRNA(Gln) amidotransferase A subunit                                  |
| PM0947 | 2 | -1.49  | 0.14 | 0.10 | 0.27 | Conserved hypothetical protein                            | conserved hypothetical protein                                                 |
| PM0949 | 2 | 0.68   | 2.01 | 1.42 | 0.76 | Conserved hypothetical protein                            | conserved hypothetical protein                                                 |
| PM0950 | 2 | -0.23  | 1.15 | 0.81 | 0.51 | Other                                                     | No Cyanobase Name                                                              |
| PM0953 | 2 | 1.21   | 0.72 | 0.51 | 0.49 | Conserved hypothetical protein                            | conserved hypothetical protein                                                 |
| PM0954 | 2 | 0.29   | 0.14 | 0.10 | 0.82 | Transport and binding proteins                            | ABC transporter, multidrug efflux family                                       |

|         |   |           |      |      |                                                                |                                                                                                       |
|---------|---|-----------|------|------|----------------------------------------------------------------|-------------------------------------------------------------------------------------------------------|
| PM0955  | 2 | 1.47      | 0.20 | 0.14 | 0.21 Protein modification and translation factors              | Peptide methionine sulfoxide reductase                                                                |
| PM0957  | 2 | 1.25      | 0.56 | 0.39 | 0.27 Regulatory functions                                      | possible GRAM domain                                                                                  |
| PM0958  | 2 | 0.80      | 0.91 | 0.64 | 0.53 Conserved hypothetical protein                            | conserved hypothetical                                                                                |
| PM0963  | 2 | 1.20      | 0.31 | 0.22 | 0.38 Nitrogen metabolism                                       | Urease alpha subunit                                                                                  |
| PM0964  | 2 | 2.37      | 1.71 | 1.21 | 0.01 Nitrogen metabolism                                       | Urease beta subunit                                                                                   |
| PM0965  | 2 | 2.68      | 0.35 | 0.25 | 0.00 Nitrogen metabolism                                       | Urease gamma subunit                                                                                  |
| PM0966  | 2 | 2.36      | 1.39 | 0.98 | 0.02 Nitrogen metabolism                                       | urease accessory protein UreD                                                                         |
| PM0969  | 2 | 1.75      | 1.99 | 1.41 | 0.02 Nitrogen metabolism                                       | urease accessory protein UreG                                                                         |
| PM0970  | 2 | 4.07      | 0.46 | 0.33 | 0.00 Transport and binding proteins                            | putative urea ABC transporter, substrate binding protein                                              |
| PM0971  | 2 | 2.37      | 0.98 | 0.69 | 0.00 Transport and binding proteins                            | putative urea ABC transporter                                                                         |
| PM0974  | 2 | 0.09      | 0.32 | 0.23 | 0.94 Transport and binding proteins                            | Putative ATP-binding subunit of urea ABC transport system                                             |
| PM0975  | 2 | 1.03      | 1.04 | 0.74 | 0.43 Conserved hypothetical protein                            | conserved hypothetical protein                                                                        |
| PM0982  | 2 | 0.54      | 0.31 | 0.22 | 0.82 DNA replication, recombination, and repair                | HNH endonuclease:HNH nuclease                                                                         |
| PM0983  | 2 | -1.42     | 1.06 | 0.75 | 0.07 Fatty acid, phospholipid and sterol metabolism            | possible ATP synthase protein 8                                                                       |
| PM0987  | 2 | -2.96     | 0.20 | 0.14 | 0.00 Ribosomal proteins                                        | 30S Ribosomal protein S21                                                                             |
| PM0988  | 2 | 2.25      | 2.32 | 1.64 | 0.01 Regulatory functions                                      | Helix-hairpin-helix DNA-binding motif class 1                                                         |
| PM0993  | 2 | -3.79     | 1.24 | 0.88 | 0.00 Conserved hypothetical protein                            | conserved hypothetical protein                                                                        |
| PM0996  | 2 | 3.51      | 1.48 | 1.04 | 0.00 Conserved hypothetical protein                            | conserved hypothetical protein                                                                        |
| PM0997  | 2 | 0.45      | 0.14 | 0.10 | 0.83 Conserved hypothetical protein                            | possible Protein of unknown function DUF67                                                            |
| PM0998  | 2 | 1.53      | 0.24 | 0.17 | 0.19 Conserved hypothetical protein                            | conserved hypothetical protein                                                                        |
| PM0999  | 2 | -0.17     | 0.20 | 0.14 | 1.00 Conserved hypothetical protein                            | hypothetical                                                                                          |
| PM1003  | 2 | -1.40     | 0.97 | 0.69 | 0.09 Photosystem II                                            | possible Photosystem II reaction centre N prot                                                        |
| PM1005  | 2 | 0.04      | 0.21 | 0.15 | 0.76 Regulatory functions                                      | possible Legume lectins alpha domain                                                                  |
| PM1008  | 2 | 0.68      | 2.18 | 1.54 | 0.90 Conserved hypothetical protein                            | hypothetical                                                                                          |
| PM1011  | 2 | #NAME? NA | NA   | NA   | 0.00 Conserved hypothetical protein                            | hypothetical                                                                                          |
| PM1015  | 2 | 3.02      | 0.58 | 0.41 | 0.00 Conserved hypothetical protein                            | conserved hypothetical protein                                                                        |
| PM1026  | 2 | 0.88      | 0.17 | 0.12 | 0.57 Conserved hypothetical protein                            | conserved hypothetical protein                                                                        |
| PM1028  | 2 | #NAME? NA | NA   | NA   | 0.00 Conserved hypothetical protein                            | conserved hypothetical                                                                                |
| PM102a  | 2 | 0.00      | 1.51 | 1.06 | 0.68 Other                                                     | No Cyanobase Name                                                                                     |
| PM1030  | 2 | -2.50     | 0.96 | 0.68 | 0.00 Regulatory functions                                      | Ferric uptake regulator family                                                                        |
| PM1031  | 2 | 2.96      | 1.18 | 0.83 | 0.00 Transport and binding proteins                            | ABC transporter, ATP binding domain, possibly Mn transport                                            |
| PM1032  | 2 | 3.65      | 0.09 | 0.06 | 0.00 Transport and binding proteins                            | ABC transporter, substrate binding protein, possibly Mn.                                              |
| PM1033  | 2 | 0.15      | 0.33 | 0.23 | 0.76 Protein modification and translation factors              | Cobalamin synthesis protein/P47K                                                                      |
| PM1037  | 2 | Inf       | NA   | NA   | 1.00 Conserved hypothetical protein                            | conserved hypothetical                                                                                |
| PM1039  | 2 | -1.55     | 0.14 | 0.10 | 0.07 Conserved hypothetical protein                            | conserved hypothetical protein                                                                        |
| PM1042  | 2 | -1.63     | 0.13 | 0.09 | 0.01 Conserved hypothetical protein                            | conserved hypothetical protein                                                                        |
| PM1045  | 2 | 0.96      | 0.53 | 0.38 | 1.00 Conserved hypothetical protein                            | conserved hypothetical                                                                                |
| PM1054  | 2 | 1.17      | 0.41 | 0.29 | 0.40 DNA replication, recombination, and repair                | Crossover junction endonuclease RuvC                                                                  |
| PM1055  | 2 | -1.42     | 0.41 | 0.29 | 0.10 Cobalamin, heme, phytyl and porphyrin                     | Protoanilin IX Magnesium chelatase, Chl subunit                                                       |
| PM1058  | 2 | 0.17      | 0.56 | 0.40 | 0.88 Cytochrome b6/f complex                                   | Cytochrome b6/f complex, subunit V                                                                    |
| PM1060  | 2 | 0.41      | 0.58 | 0.41 | 1.00 Other                                                     | Glutamine amidotransferase class-I                                                                    |
| PM1061  | 2 | -0.26     | 0.69 | 0.49 | 0.88 Thiamine                                                  | Thioredoxin                                                                                           |
| PM1063  | 2 | 0.58      | 1.57 | 1.11 | 0.97 DNA replication, recombination, and repair                | DNA gyrase/topoisomerase IV, subunit A                                                                |
| PM1066  | 2 | 0.39      | 0.50 | 0.36 | 0.82 Branched chain family                                     | 2-isopropylmalate synthase                                                                            |
| PM1067  | 2 | 0.09      | 0.21 | 0.15 | 0.95 WD repeat proteins                                        | possible Adenoviral fiber protein (repeat/shaf                                                        |
| PM1069  | 2 | -2.71     | 1.02 | 0.72 | 0.00 Folic acid                                                | putative bifunctional Methylenetetrahydrofolate dehydrogenase Methenyltetrahydrofolate/cyclohydrolase |
| PM1074  | 2 | 2.52      | 0.89 | 0.63 | 0.01 Other                                                     | Glucose-6-phosphate dehydrogenase                                                                     |
| PM1075  | 2 | 1.14      | 0.33 | 0.24 | 0.51 Cytochrome b6/f complex                                   | ferredoxin-NADP oxidoreductase (FNR)                                                                  |
| PM1077  | 2 | 0.56      | 0.07 | 0.05 | 0.94 Regulatory functions                                      | two-component sensor histidine kinase                                                                 |
| PM1078  | 2 | 0.67      | 0.60 | 0.42 | 0.64 Conserved hypothetical protein                            | conserved hypothetical                                                                                |
| PM1079  | 2 | -0.37     | 0.51 | 0.36 | 0.48 Regulatory functions                                      | possible Villin headpiece domain                                                                      |
| PM1080  | 2 | 1.11      | 0.91 | 0.64 | 0.35 Other                                                     | Ribose-phosphate pyrophosphokinase                                                                    |
| PM1086  | 2 | 0.03      | 0.95 | 0.67 | 0.83 Fatty acid, phospholipid and sterol metabolism            | Alpha/beta hydrolase fold: Esterase/lipase/thioesterase family...                                     |
| PM1088  | 2 | 0.27      | 0.12 | 0.08 | 0.75 Degradation of proteins, peptides, and glycopeptides      | CtpC                                                                                                  |
| PM1090  | 2 | 0.45      | 0.82 | 0.58 | 1.00 Branched chain family                                     | Diaminopimelate decarboxylase                                                                         |
| PM1091  | 2 | 0.33      | 0.14 | 0.10 | 1.00 Conserved hypothetical protein                            | conserved hypothetical protein                                                                        |
| PM1092  | 2 | 0.74      | 0.34 | 0.24 | 0.80 Other                                                     | Undecaprenyl pyrophosphate synthetase (Upps)                                                          |
| PM1098  | 2 | 0.00      | 0.86 | 0.61 | 0.71 Photosystem II                                            | photosystem II oxygen evolving complex protein PsbP                                                   |
| PM1107  | 2 | -0.22     | 0.12 | 0.08 | 0.67 Pyridoxine                                                | Pyridoxal phosphate biosynthetic protein PdxI                                                         |
| PM1109  | 2 | #NAME? NA | NA   | NA   | 0.12 Conserved hypothetical protein                            | conserved hypothetical protein                                                                        |
| PM1111  | 2 | -1.13     | 0.30 | 0.21 | 0.40 Other                                                     | Glutaredoxin-related protein                                                                          |
| PM1113  | 2 | -0.82     | 0.11 | 0.08 | 0.35 Regulatory functions                                      | two-component response regulator                                                                      |
| PM1116  | 2 | -1.18     | 0.29 | 0.20 | 0.07 Cell division                                             | NAD binding site:Glucose inhibited division protein A family                                          |
| PM1117  | 2 | -1.20     | 0.15 | 0.11 | 0.17 Photosystem II                                            | possible Photosystem II reaction center Y protein (PsbY)                                              |
| PM1118  | 2 | 1.46      | 0.00 | 0.00 | 1.00 Adaptations and atypical conditions                       | possible high light inducible protein                                                                 |
| PM1119  | 2 | 1.63      | 0.34 | 0.24 | 0.59 Membranes, lipoproteins and porins                        | possible porin                                                                                        |
| PM1121  | 2 | 1.74      | 0.31 | 0.22 | 1.00 Membranes, lipoproteins and porins                        | possible porin                                                                                        |
| PM1123  | 2 | 2.08      | 0.84 | 0.59 | 0.13 Hydrogenase                                               | putative hydrogenase accessory protein                                                                |
| PM1124  | 2 | 0.45      | 0.70 | 0.49 | 0.85 Other                                                     | possible Natural resistance-associated macroph                                                        |
| PM1125  | 2 | #NAME? NA | NA   | NA   | 0.08 Regulatory functions                                      | possible Bacterial regulatory proteins, deoR f                                                        |
| PM1128  | 2 | 1.87      | 0.26 | 0.18 | 0.02 Adaptations and atypical conditions                       | possible high light inducible protein                                                                 |
| PM1129  | 2 | 1.13      | 0.09 | 0.07 | 0.40 Regulatory functions                                      | possible Notch (DSL) domain                                                                           |
| PM1131  | 2 | 0.35      | 0.91 | 0.65 | 0.94 Conserved hypothetical protein                            | conserved hypothetical protein                                                                        |
| PM1132  | 2 | 1.18      | 0.46 | 0.33 | 0.99 Conserved hypothetical protein                            | conserved hypothetical protein                                                                        |
| PM1133  | 2 | 0.43      | 0.23 | 0.16 | 1.00 Conserved hypothetical protein                            | conserved hypothetical protein                                                                        |
| PM1134  | 2 | 2.49      | 0.38 | 0.27 | 0.00 Other                                                     | possible Phosphatidylinositol-specific phospho                                                        |
| PM1135  | 2 | 2.58      | 0.68 | 0.48 | 0.00 Adaptations and atypical conditions                       | possible high light inducible protein                                                                 |
| PM1138  | 2 | 0.41      | 1.20 | 0.85 | 1.00 Regulatory functions                                      | probable GTP-binding protein                                                                          |
| PM1139  | 2 | 0.47      | 1.89 | 1.33 | 1.00 Drug and analog sensitivity                               | possible membrane fusion protein                                                                      |
| PM1145  | 2 | 1.14      | 0.15 | 0.10 | 0.42 Respiration                                               | putative nicotinamide nucleotide transhydrogenase, subunit beta                                       |
| PM1146  | 2 | 1.42      | 0.19 | 0.13 | 0.34 Nicotinate and nicotinamide                               | putative nicotinamide nucleotide transhydrogenase, subunit alpha 2 (A2)                               |
| PM1147  | 2 | 1.21      | 0.83 | 0.59 | 0.60 DNA replication, recombination, and repair                | putative nicotinamide nucleotide transhydrogenase, subunit alpha 1 (A1)                               |
| PM1148  | 2 | -0.66     | 0.85 | 0.60 | 0.29 Protein modification and translation factors              | possible EF-1 guanine nucleotide exchange doma                                                        |
| PM1149  | 2 | 1.55      | 0.42 | 0.30 | 0.24 Conserved hypothetical protein                            | conserved hypothetical                                                                                |
| PM1150  | 2 | 1.54      | 0.86 | 0.61 | 0.19 Regulatory functions                                      | putative thioredoxin reductase                                                                        |
| PM1151  | 2 | 3.46      | 1.58 | 1.12 | 0.00 Protein modification and translation factors              | translation initiation factor IF-1                                                                    |
| PM1152  | 2 | 0.47      | 0.12 | 0.09 | 0.94 Photosystem II                                            | putative chaperon-like protein for quinone binding in photosystem II                                  |
| PM1152a | 2 | 0.43      | 0.08 | 0.06 | 0.80 Other                                                     | No Cyanobase Name                                                                                     |
| PM1154  | 2 | 1.98      | 0.33 | 0.23 | 0.01 Branched chain family                                     | Acetolactate synthase small subunit                                                                   |
| PM1156  | 2 | -1.07     | 0.12 | 0.09 | 0.21 Photosystem I                                             | photosystem I assembly related protein Ycf4                                                           |
| PM1157  | 2 | 2.04      | 1.07 | 0.76 | 0.53 Photosystem II                                            | Photosystem II PsbD protein (D2)                                                                      |
| PM1158  | 2 | 1.56      | 0.69 | 0.49 | 1.00 Photosystem II                                            | Photosystem II PsbC protein (CP43)                                                                    |
| PM1165  | 2 | -0.11     | 0.39 | 0.27 | 0.77 Aminoacyl tRNA synthetases and tRNA modification          | Glycyl-tRNA synthetase alpha subunit                                                                  |
| PM1167  | 2 | -0.30     | 0.66 | 0.47 | 0.65 Other                                                     | Macrophage migration inhibitory factor family                                                         |
| PM1168  | 2 | -0.13     | 0.41 | 0.29 | 0.72 Conserved hypothetical protein                            | conserved hypothetical protein                                                                        |
| PM1169  | 2 | 0.83      | 0.93 | 0.65 | 1.00 Conserved hypothetical protein                            | hypothetical                                                                                          |
| PM1170  | 2 | -0.57     | 1.07 | 0.76 | 0.62 Conserved hypothetical protein                            | conserved hypothetical protein                                                                        |
| PM1171  | 2 | -2.64     | 1.03 | 0.73 | 0.00 Soluble electron carriers                                 | Flavodoxin                                                                                            |
| PM1174  | 2 | 0.14      | 0.83 | 0.59 | 0.77 Conserved hypothetical protein                            | hypothetical                                                                                          |
| PM1176  | 2 | 0.26      | 1.78 | 1.26 | 0.72 Regulatory functions                                      | possible Helix-turn-helix protein, copG family                                                        |
| PM1179  | 2 | -0.79     | 0.42 | 0.30 | 0.42 Regulatory functions                                      | putative SMR family transporter, possible pecM homologue                                              |
| PM1180  | 2 | -0.47     | 1.21 | 0.86 | 0.64 Degradation of proteins, peptides, and glycopeptides      | signal peptide peptidase SppA (protease IV)                                                           |
| PM1183  | 2 | -1.49     | 0.48 | 0.34 | 0.03 Ribosomal proteins                                        | SOS ribosomal protein L34                                                                             |
| PM1184  | 2 | -0.55     | 1.00 | 0.71 | 0.65 Degradation of RNA                                        | Bacterial ribonuclease P protein component                                                            |
| PM1185  | 2 | -0.32     | 0.65 | 0.46 | 0.57 Conserved hypothetical protein                            | conserved hypothetical protein                                                                        |
| PM1186  | 2 | 0.36      | 0.09 | 0.06 | 0.78 Regulatory functions                                      | Putative inner membrane protein; similar to 60 kDa inner membrane protein family                      |
| PM1188  | 2 | 0.27      | 0.05 | 0.04 | 1.00 Aminoacyl tRNA synthetases and tRNA modification          | Seryl-tRNA synthetase                                                                                 |
| PM1190  | 2 | -1.03     | 0.33 | 0.23 | 0.20 Ribosomal proteins                                        | 30S Ribosomal protein S14                                                                             |
| PM1191  | 2 | -1.43     | 0.71 | 0.50 | 0.11 RNA synthesis, modification, and DNA transcription        | polyribonucleotide nucleotidyltransferase                                                             |
| PM1192  | 2 | 1.40      | 0.20 | 0.14 | 0.24 Other                                                     | CysQ protein homolog                                                                                  |
| PM1204  | 2 | 0.76      | 0.19 | 0.13 | 0.59 Surface polysaccharides, lipopolysaccharides and antigens | glucose-1-phosphate cytidyltransferase                                                                |
| PM1205  | 2 | -0.41     | 0.94 | 0.67 | 0.44 Sugars                                                    | NDP-hexose 3,4-dehydratase                                                                            |
| PM1229  | 2 | -0.02     | 0.04 | 0.03 | 0.76 Respiration                                               | Dehydrogenase, EI component                                                                           |
| PM1234  | 2 | 0.46      | 1.32 | 0.93 | 1.00 Hydrogenase                                               | Zinc-containing alcohol dehydrogenase superfamily                                                     |
| PM1235  | 2 | 0.26      | 0.46 | 0.32 | 1.00 Transport and binding proteins                            | possible N-terminal fragment of transketolase                                                         |
| PM1240  | 2 | -4.52     | 1.41 | 1.00 | 0.00 Other                                                     | methyltransferase                                                                                     |
| PM1241  | 2 | 1.35      | 0.27 | 0.19 | 0.28 Conserved hypothetical protein                            | hypothetical protein                                                                                  |
| PM1244  | 2 | -0.07     | 0.81 | 0.57 | 0.88 Conserved hypothetical protein                            | hypothetical protein                                                                                  |

|         |      |       |      |      |                                                                |                                                                   |
|---------|------|-------|------|------|----------------------------------------------------------------|-------------------------------------------------------------------|
| PMM1245 | 2    | 0.14  | 0.72 | 0.51 | 0.90 Conserved hypothetical protein                            | conserved hypothetical protein                                    |
| PMM1250 | 2    | 0.21  | 0.55 | 0.39 | 1.00 Conserved hypothetical protein                            | conserved hypothetical protein                                    |
| PMM1251 | 2    | 0.03  | 0.59 | 0.42 | 0.73 Other                                                     | Carbamoyltransferase                                              |
| PMM1252 | 2    | 0.07  | 1.19 | 0.84 | 0.81 Other                                                     | possible acetyltransferase                                        |
| PMM1257 | 2    | -1.75 | 0.59 | 0.42 | 0.13 Surface polysaccharides, lipopolysaccharides and antigens | possible dTDP-glucose 4,6-dehydratase                             |
| PMM1258 | 2    | 0.56  | 0.05 | 0.04 | 1.00 Pyridoxal                                                 | pyridoxal-phosphate-dependent aminotransferase                    |
| PMM1259 | 2    | 1.53  | 0.23 | 0.16 | 0.21 Pyridoxine                                                | pyridoxal-phosphate-dependent aminotransferase                    |
| PMM1260 | 2    | -0.14 | 0.53 | 0.38 | 0.70 Transport and binding proteins                            | Nucleoside-diphosphate-sugar epimerase                            |
| PMM1261 | 2    | 0.24  | 0.64 | 0.45 | 0.77 Sugars                                                    | UDP-glucose 6-dehydrogenase                                       |
| PMM1262 | 2    | 1.33  | 0.51 | 0.36 | 0.64 Regulatory functions                                      | SOS function regulatory protein, LexA repressor                   |
| PMM1264 | 2    | -0.54 | 0.60 | 0.42 | 0.40 Cell division                                             | cell division protein FtsH3                                       |
| PMM1267 | 2    | 0.93  | 3.28 | 2.32 | 1.00 Conserved hypothetical protein                            | conserved hypothetical                                            |
| PMM1269 | 2    | -0.14 | 0.22 | 0.16 | 1.00 Transport and binding proteins                            | predicted sugar kinase                                            |
| PMM1270 | 2    | 0.04  | 0.62 | 0.44 | 0.76 Aminoacyl tRNA synthetases and tRNA modification          | Phenylalanyl-tRNA synthetase alpha chain                          |
| PMM1272 | 2    | 0.72  | 0.94 | 0.66 | 0.86 Conserved hypothetical protein                            | conserved hypothetical protein                                    |
| PMM1273 | 2    | 0.08  | 1.01 | 0.71 | 0.78 Riboflavin                                                | putative riboflavin kinase/FAD synthase                           |
| PMM1275 | 2    | -0.39 | 1.66 | 1.18 | 1.00 Conserved hypothetical protein                            | DUF170                                                            |
| PMM1276 | 2    | -2.34 | 1.25 | 0.88 | 0.00 Conserved hypothetical protein                            | conserved hypothetical protein                                    |
| PMM1277 | 2    | -0.32 | 1.22 | 0.87 | 0.56 Conserved hypothetical protein                            | conserved hypothetical protein                                    |
| PMM1283 | 2    | 0.93  | 0.07 | 0.05 | 0.98 Conserved hypothetical protein                            | conserved hypothetical protein                                    |
| PMM1284 | 2    | 1.42  | 1.28 | 0.90 | 0.48 Adaptations and atypical conditions                       | PhoH-like phosphate starvation-inducible protein                  |
| PMM1285 | 2    | -2.85 | 0.24 | 0.17 | 0.00 Ribosomal proteins                                        | 30S Ribosomal protein S16                                         |
| PMM1286 | 2    | 0.01  | 0.91 | 0.64 | 0.77 Protein and peptide secretion                             | signal recognition particle protein (SRP54)                       |
| PMM1287 | 2    | -0.33 | 0.38 | 0.27 | 0.64 Conserved hypothetical protein                            | conserved hypothetical protein                                    |
| PMM1288 | 2    | -1.00 | 0.56 | 0.40 | 0.37 Other                                                     | Pyruvate dehydrogenase E1 alpha subunit                           |
| PMM1289 | 2    | 0.53  | 0.01 | 0.01 | 0.76 Transport and binding proteins                            | Type II alternative RNA polymerase sigma factor, sigma-70 family  |
| PMM1293 | 2    | 0.80  | 0.21 | 0.15 | 1.00 Other                                                     | FtsBP-type peptidyl-prolyl cis-trans isomerase (PP1ase)           |
| PMM1294 | 2    | 0.13  | 0.47 | 0.33 | 0.74 Hydrogenase                                               | putative nickel-containing superoxide dismutase precursor (NISOD) |
| PMM1296 | 2    | 0.42  | 0.10 | 0.07 | 0.85 Other                                                     | marine cyanobacterial conserved hypothetical                      |
| PMM1298 | 2    | -3.62 | 0.10 | 0.07 | 0.00 Regulatory functions                                      | putative dihydrolipoamide dehydrogenase                           |
| PMM1299 | 2    | -1.17 | 0.01 | 0.00 | 0.23 RNA synthesis, modification, and DNA transcription        | tRNA/rRNA methyltransferase (Spou)                                |
| PMM1300 | 2    | 0.77  | 0.51 | 0.36 | 0.90 Degradation of RNA                                        | UDP-N-glucosamine 1-carboxyvinyltransferase                       |
| PMM1301 | 2    | 1.14  | 2.29 | 1.62 | 0.95 Glutamate family / Nitrogen assimilation                  | Aminotransferase class-III pyridoxal-phosphate:Acetylornithin...  |
| PMM1304 | 2    | 0.54  | 0.74 | 0.52 | 1.00 Other                                                     | possible cytosine deaminase                                       |
| PMM1305 | 2    | 0.46  | 1.15 | 0.81 | 0.81 Conserved hypothetical protein                            | conserved hypothetical protein                                    |
| PMM1307 | 2    | 1.04  | 0.03 | 0.02 | 0.91 Conserved hypothetical protein                            | conserved hypothetical protein                                    |
| PMM1309 | 2    | 0.57  | 0.45 | 0.32 | 1.00 Cell division                                             | Cell division protein FtsZ/Tubulin/FtsZ family                    |
| PMM1310 | 2    | 0.77  | 0.20 | 0.14 | 1.00 Regulatory functions                                      | putative Ketopantate hydroxymethyltransferase                     |
| PMM1312 | 2    | 2.68  | 0.65 | 0.39 | 0.00 Conserved hypothetical protein                            | conserved hypothetical protein                                    |
| PMM1313 | 2    | 1.75  | 0.35 | 0.25 | 0.15 Degradation of proteins, peptides, and glycopeptides      | Cip protease proteolytic subunit                                  |
| PMM1314 | 2    | 2.91  | 0.83 | 0.59 | 0.00 Degradation of proteins, peptides, and glycopeptides      | Cip protease proteolytic subunit                                  |
| PMM1315 | 2    | -0.64 | 0.13 | 0.09 | 0.33 Branched chain family                                     | Ketol-acid reductoisomerase                                       |
| PMM1317 | 2    | -0.10 | 1.32 | 0.93 | 0.71 Adaptations and atypical conditions                       | possible high light inducible protein                             |
| PMM1318 | 2    | -1.04 | 2.80 | 1.98 | 0.17 Conserved hypothetical protein                            | conserved hypothetical                                            |
| PMM1319 | 2    | 0.71  | 0.43 | 0.30 | 0.60 Drug and analog sensitivity                               | possible Beta-lactamase                                           |
| PMM1321 | 2    | 2.11  | 0.66 | 0.46 | 1.00 Nucleoproteins                                            | Bacterial histone-like DNA-binding protein                        |
| PMM1322 | 2    | 0.95  | 0.79 | 0.56 | 0.97 Other                                                     | Putative isoamylase                                               |
| PMM1323 | 2    | -1.10 | 0.51 | 0.36 | 0.26 Regulatory functions                                      | putative GPH family sugar transporter                             |
| PMM1324 | 2    | 1.52  | 0.18 | 0.12 | 0.33 Transport and binding proteins                            | possible transporter, membrane component                          |
| PMM1325 | 2    | 0.51  | 0.18 | 0.13 | 1.00 Conserved hypothetical protein                            | conserved hypothetical protein                                    |
| PMM1327 | 2    | -0.31 | 0.49 | 0.35 | 0.70 Conserved hypothetical protein                            | conserved hypothetical protein                                    |
| PMM1330 | 2    | -0.76 | 0.70 | 0.50 | 0.77 Conserved hypothetical protein                            | conserved hypothetical protein                                    |
| PMM1331 | 2    | 0.21  | 0.83 | 0.59 | 0.94 Conserved hypothetical protein                            | conserved hypothetical protein                                    |
| PMM1333 | 2    | 0.83  | 0.37 | 0.26 | 0.64 Protein modification and translation factors              | Peptide methionine sulfoxide reductase                            |
| PMM1336 | 2    | -2.69 | 0.17 | 0.12 | 0.00 Fatty acid, phospholipid and sterol metabolism            | Putative (3R)-hydroxymristoyl-[acyl carrier protein] dehydratase  |
| PMM1339 | 2    | 0.04  | 0.05 | 0.03 | 0.71 Purine ribonucleotide biosynthesis                        | SAICAR synthetase                                                 |
| PMM1340 | 2    | 0.47  | 0.28 | 0.20 | 0.94 Purine ribonucleotide biosynthesis                        | phosphoribosylglycinamide synthetase                              |
| PMM1342 | 2    | 0.71  | 0.49 | 0.35 | 0.97 Other                                                     | possible circadian clock protein KaiC                             |
| PMM1343 | 2    | 1.70  | 3.05 | 2.16 | 0.91 Other                                                     | possible circadian clock oscillation regulator KaiB               |
| PMM1344 | 2    | 2.68  | 0.75 | 0.50 | 0.00 Ribosomal proteins                                        | 50S ribosomal protein L21                                         |
| PMM1345 | 2    | -3.13 | 0.31 | 0.22 | 0.00 Ribosomal proteins                                        | 50S ribosomal protein L27                                         |
| PMM1346 | 2    | -1.69 | 1.11 | 0.79 | 0.06 Conserved hypothetical protein                            | conserved hypothetical protein                                    |
| PMM1349 | 2    | 1.44  | 1.08 | 0.76 | 0.42 Conserved hypothetical protein                            | conserved hypothetical protein                                    |
| PMM1350 | 2    | -2.65 | 1.09 | 0.77 | 0.00 Other                                                     | Pentapeptide repeats                                              |
| PMM1351 | 2    | 0.86  | 0.55 | 0.39 | 0.62 Conserved hypothetical protein                            | conserved hypothetical protein                                    |
| PMM1352 | 2    | 1.40  | 0.94 | 0.67 | 1.00 Soluble electron carriers                                 | ferredoxin                                                        |
| PMM1354 | 2    | 0.01  | 0.42 | 0.30 | 0.69 Regulatory functions                                      | putative D-3-phosphoglycerate dehydrogenase (PGDH)                |
| PMM1355 | 2    | 1.37  | 0.58 | 0.41 | 0.20 Conserved hypothetical protein                            | conserved hypothetical protein                                    |
| PMM1363 | 2    | 1.52  | 0.72 | 0.51 | 0.26 Conserved hypothetical protein                            | hypothetical                                                      |
| PMM1365 | 2    | -0.98 | 1.02 | 0.72 | 0.20 Regulatory functions                                      | possible MATH domain                                              |
| PMM1368 | 2    | 1.81  | 1.77 | 1.25 | 0.37 Conserved hypothetical protein                            | conserved hypothetical protein                                    |
| PMM1369 | 2    | -1.97 | 1.81 | 1.28 | 0.00 Regulatory functions                                      | GAF domain                                                        |
| PMM1372 | 2    | -0.72 | 0.27 | 0.19 | 0.44 Conserved hypothetical protein                            | conserved hypothetical protein                                    |
| PMM1375 | 2    | -3.67 | 2.45 | 1.73 | 0.00 Conserved hypothetical protein                            | possible M protein repeat                                         |
| PMM1376 | 2    | 0.48  | 0.84 | 0.59 | 0.88 Nucleoproteins                                            | RNA-binding protein RbpD                                          |
| PMM1377 | 2    | -0.13 | 0.06 | 0.04 | 0.76 Other                                                     | possible dihydroflavonol-4-reductase (maize, petunia, tomato)...  |
| PMM1382 | 2    | 0.80  | 1.95 | 1.38 | 1.00 Fatty acid, phospholipid and sterol metabolism            | fatty acid desaturase, type 2                                     |
| PMM1383 | 2    | 2.42  | 3.23 | 2.29 | 0.01 Conserved hypothetical protein                            | conserved hypothetical protein                                    |
| PMM1384 | 2    | 3.47  | 0.32 | 0.22 | 0.00 Adaptations and atypical conditions                       | possible high light inducible protein                             |
| PMM1385 | 2    | 3.72  | 0.58 | 0.41 | 0.00 Adaptations and atypical conditions                       | possible high light inducible protein                             |
| PMM1387 | 2    | 1.77  | 0.81 | 0.57 | 0.23 Conserved hypothetical protein                            | hypothetical                                                      |
| PMM1389 | 2    | 0.65  | 0.90 | 0.64 | 0.56 Conserved hypothetical protein                            | conserved hypothetical protein                                    |
| PMM1390 | 2    | 4.81  | 1.26 | 0.89 | 0.00 Adaptations and atypical conditions                       | possible high light inducible protein                             |
| PMM1391 | 2    | 2.32  | 1.20 | 0.85 | 0.08 Regulatory functions                                      | possible Helix-turn-helix protein, copG family                    |
| PMM1392 | 2    | 2.70  | 2.08 | 1.47 | 0.01 Branched chain family                                     | possible Heat-labile enterotoxin alpha chain                      |
| PMM1394 | 2    | 0.49  | 1.05 | 0.74 | 0.70 Conserved hypothetical protein                            | hypothetical                                                      |
| PMM1395 | 2    | 2.55  | 0.26 | 0.19 | 0.00 Conserved hypothetical protein                            | hypothetical                                                      |
| PMM1396 | 2    | 4.17  | 0.20 | 0.14 | 0.00 Adaptations and atypical conditions                       | possible high light inducible protein                             |
| PMM1397 | 2    | 3.91  | 0.37 | 0.26 | 0.00 Adaptations and atypical conditions                       | possible high light inducible protein                             |
| PMM1398 | 2    | 3.64  | 1.29 | 0.91 | 0.00 Adaptations and atypical conditions                       | possible high light inducible protein                             |
| PMM1399 | 2    | 3.36  | 0.76 | 0.54 | 0.00 Adaptations and atypical conditions                       | possible high light inducible protein                             |
| PMM1400 | 2    | -1.38 | 0.14 | 0.10 | 1.00 Other                                                     | possible Hemagglutinin-neuraminidase                              |
| PMM1401 | 2    | -1.07 | 0.45 | 0.32 | 0.32 Conserved hypothetical protein                            | conserved hypothetical                                            |
| PMM1402 | 2    | -1.70 | 2.20 | 1.55 | 0.00 Conserved hypothetical protein                            | unnamed protein product                                           |
| PMM1404 | 2    | 4.57  | 0.20 | 0.14 | 0.00 Adaptations and atypical conditions                       | possible high light inducible protein                             |
| PMM1405 | 2    | 0.07  | 0.78 | 0.55 | 0.81 Conserved hypothetical protein                            | hypothetical                                                      |
| PMM1407 | 2    | 1.53  | 0.48 | 0.34 | 0.17 Other                                                     | possible SRP19 protein                                            |
| PMM1408 | 2    | 0.21  | 0.72 | 0.51 | 0.78 Conserved hypothetical protein                            | hypothetical                                                      |
| PMM1409 | 2    | 2.23  | 0.98 | 0.69 | 0.05 Other                                                     | possible Rubredoxin                                               |
| PMM1412 | 2    | 2.02  | 0.41 | 0.29 | 0.06 Conserved hypothetical protein                            | conserved hypothetical protein                                    |
| PMM1413 | 2    | 3.52  | 1.24 | 0.88 | 0.00 Conserved hypothetical protein                            | conserved hypothetical                                            |
| PMM1416 | 2    | 0.86  | 0.19 | 0.13 | 0.97 Conserved hypothetical protein                            | conserved hypothetical                                            |
| PMM1419 | 2    | -0.15 | 1.32 | 0.93 | 0.74 Transport and binding proteins                            | possible ATP synthase B/B' CF(0)                                  |
| PMM1422 | 2    | 0.89  | 0.01 | 0.01 | 0.64 Conserved hypothetical protein                            | conserved hypothetical protein                                    |
| PMM1423 | 2    | 1.33  | 0.92 | 0.65 | 0.30 Conserved hypothetical protein                            | conserved hypothetical protein                                    |
| PMM1424 | 2    | 0.00  | 0.11 | 0.08 | 0.76 Other                                                     | possible Uncharacterized protein family UPF003                    |
| PMM1427 | 2    | 2.46  | 0.57 | 0.40 | 0.00 Conserved hypothetical protein                            | conserved hypothetical                                            |
| PMM1428 | 2    | -0.36 | 0.39 | 0.28 | 0.64 Conserved hypothetical protein                            | conserved hypothetical protein                                    |
| PMM1429 | 2    | 1.39  | 1.06 | 0.75 | 0.27 Conserved hypothetical protein                            | conserved hypothetical protein                                    |
| PMM1430 | 2    | 0.51  | 0.30 | 0.21 | 1.00 Conserved hypothetical protein                            | conserved hypothetical protein                                    |
| PMM1431 | 2    | -0.07 | 0.35 | 0.25 | 0.70 RNA synthesis, modification, and DNA transcription        | putative DNA-directed RNA polymerase (omega chain)                |
| PMM1434 | 2    | 1.43  | 0.67 | 0.47 | 0.46 Glycolysis                                                | Phosphoglycerate mutase, co-factor-independent (iPGM)             |
| PMM1435 | 2    | 1.74  | 1.25 | 0.89 | 0.13 Conserved hypothetical protein                            | conserved hypothetical protein                                    |
| PMM1436 | 2    | -2.12 | 0.68 | 0.48 | 0.12 Chaperones                                                | GroEL protein (Chaperonin cpn60)                                  |
| PMM1437 | 2    | -2.63 | 0.66 | 0.47 | 0.00 Chaperones                                                | GroES protein (Chaperonin cpn10)                                  |
| PMM1438 | 2    | -3.05 | 0.31 | 0.22 | 0.00 ATP synthase                                              | ATP synthase beta subunit, central region:ATP synth...            |
| PMM1440 | 2    | -1.60 | 0.17 | 0.12 | 0.00 Conserved hypothetical protein                            | conserved hypothetical protein                                    |
| PMM1441 | 2 NA | NA    | NA   | NA   | 0.00 Conserved hypothetical protein                            | hypothetical                                                      |

|         |   |       |      |      |                                                           |                                                                                   |
|---------|---|-------|------|------|-----------------------------------------------------------|-----------------------------------------------------------------------------------|
| PMM1442 | 2 | 1.57  | 1.19 | 0.84 | 0.16 Regulatory functions                                 | putative aminopeptidase P                                                         |
| PMM1443 | 2 | 0.35  | 0.60 | 0.42 | 1.00 Conserved hypothetical protein                       | Domain of unknown function DUF21                                                  |
| PMM1449 | 2 | 1.36  | 1.41 | 1.00 | 0.27 Soluble electron carriers                            | ferredoxin                                                                        |
| PMM1451 | 2 | -3.00 | 1.24 | 0.88 | 0.00 ATP synthase                                         | ATP synthase alpha subunit, central region:ATP synth...                           |
| PMM1452 | 2 | -5.53 | 0.51 | 0.36 | 0.00 ATP synthase                                         | ATP synthase, delta [OSCP] subunit                                                |
| PMM1453 | 2 | -5.25 | 0.32 | 0.22 | 0.00 ATP synthase                                         | ATP synthase B'/ CF0                                                              |
| PMM1454 | 2 | -4.69 | 0.02 | 0.01 | 0.00 ATP synthase                                         | ATP synthase B'/ CF0                                                              |
| PMM1455 | 2 | -4.17 | 0.13 | 0.09 | 0.00 Membranes, lipoproteins and porins                   | Eubacterial and plasma membrane ATP synthase subunit C/ATP sy...                  |
| PMM1456 | 2 | -1.49 | 1.43 | 1.01 | 0.04 ATP synthase                                         | ATP synthase A subunit                                                            |
| PMM1457 | 2 | -3.20 | 0.77 | 0.54 | 0.00 Conserved hypothetical protein                       | possible ATP synthase subunit 1                                                   |
| PMM1459 | 2 | 0.29  | 1.08 | 0.76 | 0.77 Regulatory functions                                 | putative c-type cytochrome biogenesis protein CcdA                                |
| PMM1462 | 2 | 0.01  | 0.77 | 0.54 | 0.71 Conserved hypothetical protein                       | conserved hypothetical protein                                                    |
| PMM1463 | 2 | 0.69  | 0.63 | 0.44 | 0.96 Other                                                | Nitrogen regulatory protein P-II                                                  |
| PMM1477 | 2 | 2.22  | 1.30 | 0.92 | 0.01 Conserved hypothetical protein                       | conserved hypothetical                                                            |
| PMM1478 | 2 | 0.56  | 0.75 | 0.53 | 1.00 Conserved hypothetical protein                       | conserved hypothetical protein                                                    |
| PMM1479 | 2 | 0.26  | 0.01 | 0.01 | 0.85 Conserved hypothetical protein                       | conserved hypothetical protein                                                    |
| PMM1480 | 2 | 0.86  | 0.10 | 0.07 | 0.55 Conserved hypothetical protein                       | conserved hypothetical protein                                                    |
| PMM1482 | 2 | -0.22 | 2.22 | 1.57 | 0.88 Adaptations and atypical conditions                  | possible high light inducible protein                                             |
| PMM1483 | 2 | -0.86 | 0.16 | 0.11 | 0.25 RNA synthesis, modification, and DNA transcription   | RNA polymerase beta prime subunit                                                 |
| PMM1484 | 2 | 0.21  | 0.23 | 0.16 | 0.76 RNA synthesis, modification, and DNA transcription   | RNA polymerase gamma subunit                                                      |
| PMM1485 | 2 | -0.06 | 0.16 | 0.12 | 0.64 RNA synthesis, modification, and DNA transcription   | RNA polymerase beta subunit                                                       |
| PMM1487 | 2 | -0.34 | 2.20 | 1.56 | 0.68 Ribosomal proteins                                   | 30s Ribosomal protein S20                                                         |
| PMM1489 | 2 | 0.23  | 0.75 | 0.53 | 1.00 Other                                                | Ribose 5-phosphate isomerase                                                      |
| PMM1490 | 2 | 2.10  | 0.14 | 0.10 | 0.01 Degradation of proteins, peptides, and glycopeptides | Serine proteases, trypsin family:Chymotrypsin serine protease...                  |
| PMM1492 | 2 | -0.50 | 0.49 | 0.35 | 0.45 RNA synthesis, modification, and DNA transcription   | N utilization substance protein A                                                 |
| PMM1494 | 2 | 0.26  | 0.27 | 0.19 | 1.00 Protein modification and translation factors         | Translation initiation factor IF-2                                                |
| PMM1495 | 2 | Inf   | NA   | NA   | 0.85 Conserved hypothetical protein                       | hypothetical                                                                      |
| PMM1498 | 2 | 1.00  | 0.49 | 0.34 | 0.65 Conserved hypothetical protein                       | conserved hypothetical protein                                                    |
| PMM1499 | 2 | 0.30  | 0.19 | 0.14 | 1.00 Conserved hypothetical protein                       | conserved hypothetical protein                                                    |
| PMM1500 | 2 | 1.35  | 0.20 | 0.14 | 0.51 Regulatory functions                                 | putative aminotransferase                                                         |
| PMM1501 | 2 | 0.13  | 0.03 | 0.02 | 0.74 Other                                                | S1 RNA binding domain:Ribonuclease E and G                                        |
| PMM1504 | 2 | 0.40  | 0.66 | 0.47 | 0.80 Aromatic amino acid family                           | Chorismate mutase-Prephenate dehydratase                                          |
| PMM1506 | 2 | -0.62 | 0.09 | 0.07 | 0.53 Regulatory functions                                 | ATP-dependent protease La (LON) domain                                            |
| PMM1507 | 2 | -1.19 | 0.65 | 0.46 | 0.15 Ribosomal proteins                                   | 30S ribosomal protein S10                                                         |
| PMM1508 | 2 | 0.08  | 0.26 | 0.19 | 0.87 Protein modification and translation factors         | Elongation factor Tu                                                              |
| PMM1509 | 2 | 0.55  | 0.37 | 0.26 | 0.93 Protein modification and translation factors         | Elongation factor G                                                               |
| PMM1510 | 2 | -1.26 | 1.24 | 0.87 | 0.10 Ribosomal proteins                                   | 30S ribosomal protein S7                                                          |
| PMM1511 | 2 | -3.43 | 0.79 | 0.56 | 0.00 Ribosomal proteins                                   | 30S ribosomal protein S12                                                         |
| PMM1512 | 2 | 0.81  | 0.05 | 0.05 | 1.00 Glutamate family / Nitrogen assimilation             | Ferredoxin-dependent glutamate synthase, Fd-GOGAT                                 |
| PMM1514 | 2 | -0.11 | 0.76 | 0.54 | 0.69 Other                                                | lipic acid synthetase                                                             |
| PMM1515 | 2 | 1.15  | 1.12 | 0.79 | 0.45 Other                                                | Site-specific recombinase                                                         |
| PMM1519 | 2 | -1.31 | 1.09 | 0.77 | 0.01 Photosystem I                                        | Photosystem I PsaL protein (subunit XI)                                           |
| PMM1520 | 2 | -2.01 | 0.87 | 0.62 | 0.00 Photosystem I                                        | photosystem I subunit VIII (PsaI)                                                 |
| PMM1523 | 2 | -0.97 | 0.05 | 0.04 | 0.40 Photosystem I                                        | Photosystem I PsaB protein                                                        |
| PMM1524 | 2 | -0.14 | 0.13 | 0.09 | 0.86 Photosystem I                                        | Photosystem I PsaA protein                                                        |
| PMM1528 | 2 | -0.37 | 0.02 | 0.02 | 0.66 DNA replication, recombination, and repair           | HNH endonuclease family protein                                                   |
| PMM1530 | 2 | -0.86 | 0.33 | 0.23 | 0.35 Ribosomal proteins                                   | 50S ribosomal protein L31                                                         |
| PMM1531 | 2 | -0.84 | 0.31 | 0.22 | 1.00 Ribosomal proteins                                   | 50S ribosomal protein S9                                                          |
| PMM1532 | 2 | -2.19 | 0.39 | 0.28 | 0.00 Ribosomal proteins                                   | 50S ribosomal protein L13                                                         |
| PMM1534 | 2 | -0.82 | 1.09 | 0.77 | 0.23 Ribosomal proteins                                   | 50S ribosomal protein L17                                                         |
| PMM1535 | 2 | -0.69 | 0.78 | 0.55 | 0.42 RNA synthesis, modification, and DNA transcription   | Bacterial RNA polymerase, alpha chain                                             |
| PMM1536 | 2 | -2.80 | 0.13 | 0.09 | 0.00 Ribosomal proteins                                   | 30S ribosomal protein S11                                                         |
| PMM1537 | 2 | -3.72 | 0.88 | 0.62 | 0.00 Ribosomal proteins                                   | 30S ribosomal protein S13                                                         |
| PMM1538 | 2 | -3.41 | 0.89 | 0.63 | 0.00 Ribosomal proteins                                   | 50S Ribosomal protein L36                                                         |
| PMM1540 | 2 | -0.68 | 0.01 | 0.01 | 0.48 Protein and peptide secretion                        | preprotein translocase SecY subunit                                               |
| PMM1541 | 2 | -0.55 | 0.97 | 0.69 | 0.41 Ribosomal proteins                                   | 50S ribosomal protein L15                                                         |
| PMM1542 | 2 | -2.39 | 2.28 | 1.61 | 0.14 Ribosomal proteins                                   | 30S ribosomal protein S5                                                          |
| PMM1543 | 2 | 0.01  | 1.25 | 0.88 | 0.71 Ribosomal proteins                                   | 50S ribosomal protein L18                                                         |
| PMM1544 | 2 | -0.76 | 0.19 | 0.14 | 0.42 Ribosomal proteins                                   | 50S ribosomal protein L6                                                          |
| PMM1545 | 2 | -2.10 | 0.11 | 0.08 | 0.01 Ribosomal proteins                                   | 30S ribosomal protein S8                                                          |
| PMM1546 | 2 | -1.09 | 1.25 | 0.88 | 0.13 Ribosomal proteins                                   | 50S ribosomal protein L5                                                          |
| PMM1548 | 2 | 0.07  | 0.08 | 0.05 | 0.77 Ribosomal proteins                                   | 50S Ribosomal protein L14                                                         |
| PMM1549 | 2 | -0.61 | 0.37 | 0.26 | 0.73 Ribosomal proteins                                   | 30S Ribosomal protein S17                                                         |
| PMM1550 | 2 | -1.70 | 0.06 | 0.04 | 0.13 Ribosomal proteins                                   | 50S ribosomal protein L29                                                         |
| PMM1551 | 2 | -1.06 | 0.13 | 0.09 | 0.22 Ribosomal proteins                                   | 50S ribosomal protein L16                                                         |
| PMM1552 | 2 | -2.26 | 0.40 | 0.28 | 0.00 Ribosomal proteins                                   | 30S ribosomal protein S3                                                          |
| PMM1553 | 2 | -2.23 | 0.17 | 0.12 | 0.00 Ribosomal proteins                                   | 50S ribosomal protein L22                                                         |
| PMM1554 | 2 | -2.06 | 0.57 | 0.41 | 0.00 Ribosomal proteins                                   | 30S Ribosomal protein S19                                                         |
| PMM1555 | 2 | -2.44 | 0.14 | 0.10 | 0.00 Ribosomal proteins                                   | 50S ribosomal protein L2                                                          |
| PMM1556 | 2 | -1.90 | 0.85 | 0.60 | 0.00 Ribosomal proteins                                   | 50S ribosomal protein L23                                                         |
| PMM1557 | 2 | -1.91 | 0.12 | 0.13 | 0.00 Ribosomal proteins                                   | 50S ribosomal protein L4                                                          |
| PMM1558 | 2 | -4.30 | 1.79 | 1.26 | 0.00 Ribosomal proteins                                   | 50S ribosomal protein L3                                                          |
| PMM1559 | 2 | 1.45  | 1.24 | 0.88 | 0.06 Conserved hypothetical protein                       | conserved hypothetical protein                                                    |
| PMM1562 | 2 | 2.54  | 0.23 | 0.16 | 0.02 DNA replication, recombination, and repair           | RecA bacterial DNA recombination protein                                          |
| PMM1563 | 2 | -0.25 | 0.58 | 0.41 | 1.00 Conserved hypothetical protein                       | conserved hypothetical protein                                                    |
| PMM1566 | 2 | -0.13 | 0.58 | 0.41 | 0.71 Conserved hypothetical protein                       | conserved hypothetical protein                                                    |
| PMM1568 | 2 | 0.06  | 0.16 | 0.11 | 0.71 Conserved hypothetical protein                       | conserved hypothetical protein                                                    |
| PMM1570 | 2 | -1.59 | 0.17 | 0.12 | 0.00 Cobalamin, heme, phycobilin and porphyrin            | ATP:corrinoid adenosyltransferase BtuR/CobO/CobP                                  |
| PMM1571 | 2 | 1.07  | 0.43 | 0.31 | 0.49 Conserved hypothetical protein                       | conserved hypothetical protein                                                    |
| PMM1575 | 2 | 1.21  | 0.21 | 0.15 | 0.37 Pyruvate and acetyl-CoA metabolism                   | Phosphoenolpyruvate carboxylase                                                   |
| PMM1578 | 2 | -1.24 | 0.03 | 0.02 | 0.20 Photosystem I                                        | Photosystem I protein PsaD                                                        |
| PMM1581 | 2 | -0.22 | 0.72 | 0.56 | 0.56 Regulatory functions                                 | MIRP protein homolog                                                              |
| PMM1583 | 2 | 0.64  | 0.10 | 0.07 | 0.93 Conserved hypothetical protein                       | conserved hypothetical protein                                                    |
| PMM1585 | 2 | -0.68 | 0.55 | 0.39 | 0.67 Conserved hypothetical protein                       | conserved hypothetical protein                                                    |
| PMM1588 | 2 | 1.27  | 0.35 | 0.25 | 0.42 Regulatory functions                                 | possible Conserved carboxylase domain                                             |
| PMM1594 | 2 | 0.95  | 0.28 | 0.20 | 0.64 Cobalamin, heme, phycobilin and porphyrin            | Heme oxygenase                                                                    |
| PMM1596 | 2 | -0.02 | 0.60 | 0.42 | 0.76 Other                                                | Isocitrate dehydrogenase                                                          |
| PMM1599 | 2 | -0.18 | 0.05 | 0.04 | 0.71 Conserved hypothetical protein                       | conserved hypothetical protein                                                    |
| PMM1600 | 2 | 0.94  | 0.93 | 0.65 | 1.00 Transport and binding proteins                       | putative Na <sup>+</sup> /H <sup>+</sup> antiporter, CPA2 family                  |
| PMM1601 | 2 | 2.52  | 0.31 | 0.22 | 0.00 Other                                                | phosphorylase                                                                     |
| PMM1602 | 2 | 1.14  | 0.53 | 0.38 | 0.53 Conserved hypothetical protein                       | conserved hypothetical protein                                                    |
| PMM1603 | 2 | 3.07  | 0.59 | 0.42 | 0.00 Regulatory functions                                 | putative ribonuclease II                                                          |
| PMM1604 | 2 | -1.88 | 0.17 | 0.12 | 0.02 Conserved hypothetical protein                       | conserved hypothetical protein                                                    |
| PMM1605 | 2 | 2.29  | 1.75 | 1.23 | 0.03 Protein modification and translation factors         | possible 16S rRNA processing protein RimM                                         |
| PMM1606 | 2 | -1.28 | 1.33 | 0.94 | 0.12 Other                                                | Glutamine-fructose-6-phosphate transaminase (isomerizing)                         |
| PMM1607 | 2 | -1.79 | 0.48 | 0.34 | 0.00 Photosystem I                                        | Photosystem I subunit PsaC                                                        |
| PMM1608 | 2 | -2.11 | 1.02 | 0.72 | 0.00 Fatty acid, phospholipid and sterol metabolism       | acyl carrier protein (ACP)                                                        |
| PMM1609 | 2 | -2.59 | 0.30 | 0.21 | 0.00 Fatty acid, phospholipid and sterol metabolism       | 3-oxoacyl-[acyl-carrier-protein] synthase II                                      |
| PMM1610 | 2 | -1.80 | 0.11 | 0.08 | 0.00 Other                                                | Transketolase                                                                     |
| PMM1611 | 2 | 0.90  | 0.30 | 0.21 | 1.00 Thiamine                                             | ThiC family                                                                       |
| PMM1613 | 2 | 0.46  | 1.12 | 0.79 | 0.78 Other                                                | Zinc metallopeptidase M20/M25/M40 family                                          |
| PMM1615 | 2 | 2.44  | 0.14 | 0.10 | 0.00 DNA replication, recombination, and repair           | Holliday junction DNA helicase RuvB                                               |
| PMM1616 | 2 | 0.56  | 0.05 | 0.05 | 0.88 Other                                                | tRNA binding protein SngB                                                         |
| PMM1617 | 2 | -1.04 | 0.37 | 0.26 | 1.00 Conserved hypothetical protein                       | conserved hypothetical protein                                                    |
| PMM1619 | 2 | -0.05 | 0.35 | 0.25 | 1.00 Regulatory functions                                 | two-component response regulator                                                  |
| PMM1622 | 2 | 0.58  | 0.65 | 0.46 | 1.00 Murein sacculus and peptidoglycan                    | Rod shape determining protein                                                     |
| PMM1623 | 2 | 3.39  | 0.08 | 0.05 | 0.00 DNA replication, recombination, and repair           | single-stranded DNA-binding protein                                               |
| PMM1625 | 2 | 1.37  | 0.70 | 0.49 | 0.52 Amino acids and amines                               | putative adenosylhomocysteinase                                                   |
| PMM1626 | 2 | 2.53  | 1.13 | 0.80 | 0.00 Conserved hypothetical protein                       | conserved hypothetical protein                                                    |
| PMM1629 | 2 | 0.93  | 0.51 | 0.36 | 0.64 Transport and binding proteins                       | Type II alternative RNA polymerase sigma factor, sigma-70 family                  |
| PMM1630 | 2 | -0.58 | 0.07 | 0.05 | 0.90 Transport and binding proteins                       | MgtE family, putative magnesium transport protein                                 |
| PMM1634 | 2 | 1.76  | 0.67 | 0.47 | 0.12 DNA replication, recombination, and repair           | DNA gyrase, subunit B                                                             |
| PMM1635 | 2 | -1.11 | 0.20 | 0.14 | 0.21 Aminoacyl tRNA synthetases and tRNA modification     | tRNA delta-2-isopentenylpyrophosphate (IPP) transferase                           |
| PMM1636 | 2 | -0.72 | 0.52 | 0.37 | 0.50 Protein modification and translation factors         | Translation initiation factor 3                                                   |
| PMM1639 | 2 | -0.16 | 0.27 | 0.19 | 0.64 Protein and peptide secretion                        | Preprotein translocase SecA subunit                                               |
| PMM1640 | 2 | 0.01  | 1.92 | 1.36 | 0.98 Regulatory functions                                 | putative acetyltransferase, GNAT family                                           |
| PMM1642 | 2 | 0.75  | 0.04 | 0.03 | 1.00 Regulatory functions                                 | possible transcription regulator                                                  |
| PMM1643 | 2 | -0.70 | 0.56 | 0.40 | 0.27 Riboflavin                                           | Putative 6,7-dimethyl-8-ribitylumazine synthase or riboflavin synthase beta chain |

|         |   |       |      |      |                                                           |                                                                  |
|---------|---|-------|------|------|-----------------------------------------------------------|------------------------------------------------------------------|
| PMM1644 | 2 | -2.09 | 0.92 | 0.65 | 0.00 Photosystem II                                       | possible Photosystem II reaction center Z protein (PsbZ)         |
| PMM1648 | 2 | 0.97  | 0.21 | 0.15 | 0.92 Branched chain family                                | Aspartate kinase                                                 |
| PMM1649 | 2 | 1.15  | 0.67 | 0.47 | 0.46 DNA replication, recombination, and repair           | Excinuclease ABC subunit B (UvrB)                                |
| PMM1650 | 2 | -1.53 | 0.21 | 0.15 | 0.07 Conserved hypothetical protein                       | conserved hypothetical protein                                   |
| PMM1652 | 2 | 0.81  | 0.68 | 0.48 | 1.00 Conserved hypothetical protein                       | conserved hypothetical protein                                   |
| PMM1653 | 2 | 0.18  | 0.12 | 0.09 | 0.73 Aspartate family                                     | Dihydrodipicolinate synthetase                                   |
| PMM1655 | 2 | -1.04 | 1.24 | 0.88 | 0.17 Other                                                | FKBP-type peptidyl-prolyl cis-trans isomerase (PPIase)           |
| PMM1656 | 2 | -0.64 | 1.63 | 1.15 | 0.57 Degradation of proteins, peptides, and glycopeptides | Clp protease proteolytic subunit                                 |
| PMM1657 | 2 | 0.37  | 0.85 | 0.60 | 0.74 Degradation of proteins, peptides, and glycopeptides | Clp protease ATP-binding subunit, ClpX                           |
| PMM1661 | 2 | -2.05 | 1.33 | 0.94 | 0.00 Ribosomal proteins                                   | 50S ribosomal protein L35                                        |
| PMM1662 | 2 | -1.24 | 1.10 | 0.78 | 0.18 Ribosomal proteins                                   | 50S ribosomal protein L20                                        |
| PMM1665 | 2 | -0.86 | 1.14 | 0.80 | 0.33 Fatty acid, phospholipid and sterol metabolism       | sulfolipid (UDP-sulfoquinovose) biosynthesis protein             |
| PMM1667 | 2 | 1.06  | 0.26 | 0.18 | 0.58 Conserved hypothetical protein                       | conserved hypothetical protein                                   |
| PMM1669 | 2 | 2.91  | 0.41 | 0.29 | 0.00 Regulatory functions                                 | putative Glycine cleavage H-protein                              |
| PMM1671 | 2 | 0.59  | 0.74 | 0.52 | 0.96 Conserved hypothetical protein                       | conserved hypothetical protein                                   |
| PMM1672 | 2 | 1.59  | 0.07 | 0.05 | 0.15 Fatty acid, phospholipid and sterol metabolism       | Fatty acid desaturase, type 1                                    |
| PMM1673 | 2 | 0.42  | 0.94 | 0.66 | 0.85 Ribosomal proteins                                   | 50S ribosomal protein L9                                         |
| PMM1676 | 2 | 0.46  | 0.93 | 0.66 | 0.71 Conserved hypothetical protein                       | conserved hypothetical protein                                   |
| PMM1678 | 2 | 2.21  | 0.81 | 0.57 | 0.02 Conserved hypothetical protein                       | conserved hypothetical protein                                   |
| PMM1680 | 2 | 3.15  | 0.78 | 0.55 | 0.00 Conserved hypothetical protein                       | conserved hypothetical protein                                   |
| PMM1683 | 2 | -0.33 | 0.36 | 0.26 | 0.64 Conserved hypothetical protein                       | conserved hypothetical                                           |
| PMM1685 | 2 | 1.80  | 0.43 | 0.31 | 0.07 Regulatory functions                                 | putative spermidine synthase                                     |
| PMM1688 | 2 | -0.18 | 0.05 | 0.03 | 0.71 Aminoacyl tRNA synthetases and tRNA modification     | Aspartyl-tRNA synthetase                                         |
| PMM1689 | 2 | 1.52  | 1.09 | 0.77 | 0.33 Pyrimidine ribonucleotide biosynthesis               | Glutamine amidotransferase class-I:CTP synthase                  |
| PMM1694 | 2 | 1.19  | 1.53 | 1.08 | 0.40 Cobalamin, heme, phycobilin and porphyrin            | putative uroporphyrin-III C-methyltransferase                    |
| PMM1697 | 2 | -0.02 | 0.11 | 0.08 | 1.00 Transport and binding proteins                       | Type II alternative RNA polymerase sigma factor, sigma-70 family |
| PMM1700 | 2 | 2.96  | 0.64 | 0.45 | 0.00 Other                                                | Aconitate hydratase B                                            |
| PMM1702 | 2 | -0.16 | 0.15 | 0.11 | 0.64 Purine ribonucleotide biosynthesis                   | formyltetrahydrofolate deformylase                               |
| PMM1703 | 2 | 0.89  | 0.20 | 0.14 | 0.57 Transport and binding proteins                       | NAD binding site:D-amino acid oxidase                            |
| PMM1704 | 2 | -1.74 | 0.28 | 0.20 | 0.11 Chaperones                                           | Molecular chaperone DnaK2, heat shock protein hsp70-2            |
| PMM1706 | 2 | -4.65 | 3.37 | 2.38 | 0.00 Ribosomal proteins                                   | 30S ribosomal protein S6                                         |
| PMM1707 | 2 | 0.40  | 0.09 | 0.07 | 0.80 Glutamate family / Nitrogen assimilation             | Argininosuccinate synthase                                       |
| PMM1708 | 2 | 0.87  | 0.01 | 0.01 | 1.00 Conserved hypothetical protein                       | conserved hypothetical protein                                   |
| PMM1716 | 2 | 0.04  | 1.21 | 0.86 | 0.69 Aspartate family                                     | No Cyanobase Name                                                |
| PMM1717 | 2 | -2.23 | 0.21 | 0.15 | 0.58 Other                                                | No Cyanobase Name                                                |
| PMM1718 | 2 | 0.81  | 1.17 | 0.83 | 0.75 Other                                                | No Cyanobase Name                                                |
