# Supplementary material for: Nitrogen cost minimization is promoted by structural changes in the transcriptome of N-deprived Prochlorococcus cells
Source: PubMed Central journal article supplement (PMC5607370; doi:10.1038/ismej.2017.88), 2017-06-06
Supplement: ismej201788x13.pdf [file ismej201788x13.pdf]

Table S6. Transcripts Described During 12 and 24 Hours Post Starvation

| Name     | Log2 Fold Change (3hr) | Standard Error (3hr) | p-value (3hr) | Log2 Fold Change (12hr) | Standard Error (12hr) | p-value (12hr) | Log2 Fold Change (24hr) | Standard Error (24hr) | p-value (24hr) | Category                                             | MIT Annotation                                                |
|----------|------------------------|----------------------|---------------|-------------------------|-----------------------|----------------|-------------------------|-----------------------|----------------|------------------------------------------------------|---------------------------------------------------------------|
| PMM11314 | 1.82                   | 0.47                 | 3.89E-01      | 2.91                    | 0.59                  | 1.15E-09       | 3                       | 0.56                  | 1.44E-11       | Degradation of proteins, peptides, and glycopeptides | clpP3 Clp protease proteolytic subunit                        |
| PMM1490  | -1.38                  | 0.38                 | 3.05E-01      | 2.1                     | 0.1                   | 9.20E-03       | 2.79                    | 0.28                  | 1.64E-08       | Degradation of proteins, peptides, and glycopeptides | Serine proteases, trypsin family:Chymotrypsinserine protease  |
| PMM1623  | 0.7                    | 0.08                 | 1.00E+00      | 3.39                    | 0.05                  | 8.01E-17       | 3.08                    | 0.67                  | 6.63E-10       | DNA replication, recombination, and repair           | ssb single-stranded DNA-binding protein                       |
| PMM1562  | -1.32                  | 0.63                 | 1.00E+00      | 2.54                    | 0.16                  | 1.79E-02       | 3.38                    | 0.47                  | 2.40E-15       | DNA replication, recombination, and repair           | recA RecA bacterial DNA recombination protein                 |
| PMM1615  | -2.79                  | 0.07                 | 2.95E-07      | 2.44                    | 0.1                   | 2.30E-04       | 2.15                    | 0.75                  | 1.34E-02       | DNA replication, recombination, and repair           | ruvB Holliday junction DNA helicase RuvB                      |
| PMM1262  | 2.37                   | 0.36                 | 1.82E-02      | 1.33                    | 0.36                  | 6.37E-01       | 2.02                    | 0.16                  | 1.93E-02       | Regulatory functions                                 | SOS function regulatory protein, LexA repressor               |
| PMM0965  | -1.57                  | 0.89                 | 1.36E-01      | 2.6                     | 0.25                  | 5.45E-05       | 3.08                    | 0.51                  | 5.73E-12       | N metabolism                                         | ureA Urease gamma subunit                                     |
| PMM0964  | -1.82                  | 0.06                 | 1.01E-01      | 2.37                    | 1.21                  | 5.28E-03       | 2.33                    | 0.1                   | 7.76E-06       | N metabolism                                         | ureB Urease beta subunit                                      |
| PMM0969  | -1.85                  | 0.72                 | 1.04E-01      | 1.75                    | 1.41                  | 2.17E-02       | 1.85                    | 0.66                  | 4.57E-02       | N metabolism                                         | ureG urease accessory protein UreG                            |
| PMM0223  | -1.77                  | 0                    | 1.00E+00      | 2.84                    | 0.15                  | 8.31E-02       | 2.47                    | 0.26                  | 6.00E-05       | Photosystem II                                       | Photosystem II PsbA protein (D1)                              |
| PMM0550  | 2.93                   | 0.5                  | 4.41E-05      | -1.48                   | 0.14                  | 5.18E-03       | -1.28                   | 0.16                  | 1.09E-01       | CO2 fixation                                         | rbcL, cbbL Ribulose biphosphate carboxylase, large chain      |
| PMM0551  | 1.86                   | 1.22                 | 9.56E-07      | -1.09                   | 0.45                  | 2.50E-01       | -1.24                   | 0.01                  | 8.99E-02       | CO2 fixation                                         | rbcS, cbbS Ribulose biphosphate carboxylase, Small chain      |
| PMM0468  | 0.95                   | 0.37                 | 1.00E+00      | -3.46                   | 1.3                   | 1.10E-23       | -2.93                   | 0.23                  | 1.83E-18       | Photosystem I                                        | Photosystem I PsaI protein (subunit IX)                       |
| PMM0540  | 3.64                   | 0.58                 | 1.25E-23      | -3.39                   | 1.23                  | 3.26E-05       | -3.57                   | 1.11                  | 1.49E-25       | Photosystem I                                        | psaM possible photosystem I reaction centre subunitXII (PsaM) |
| PMM0329  | 0.92                   | 0.17                 | 1.00E+00      | -2.52                   | 0.09                  | 4.20E-10       | -2.13                   | 0.23                  | 1.63E-07       | Photosystem I                                        | psaE Photosystem I PsaE protein (subunit IV)                  |
| PMM0469  | -0.05                  | 0.47                 | 1.00E+00      | -2.4                    | 0.4                   | 1.30E-10       | -3.27                   | 0.21                  | 8.01E-32       | Photosystem I                                        | psaF Photosystem I PsaF protein (subunit III)                 |
| PMM0272  | -0.8                   | 0.39                 | 1.00E+00      | -3.34                   | 0.47                  | 3.46E-36       | -4.18                   | 0.77                  | 3.06E-153      | Photosystem II                                       | Photosystem II protein PsbK                                   |
| PMM0251  | -0.83                  | 0.42                 | 1.00E+00      | -2.46                   | 0.06                  | 1.63E-09       | -2.79                   | 0.18                  | 1.84E-17       | Photosystem II                                       | psbH Photosystem II PsbH protein                              |
| PMM1644  | -0.24                  | 0.51                 | 1.00E+00      | -2.09                   | 0.92                  | 1.84E-05       | -3.4                    | 0.78                  | 1.56E-47       | Photosystem II                                       | psbZ possible Photosystem II reaction center Z protein(PsbZ)  |
