# Supplementary material for: Nitrogen cost minimization is promoted by structural changes in the transcriptome of N-deprived Prochlorococcus cells
Source: PubMed Central journal article supplement (PMC5607370; doi:10.1038/ismej.2017.88), 2017-06-06
Supplement: ismej201788x14.pdf [file ismej201788x14.pdf]

Table S7. High Light Inducible Protein 12 Hour Fold Changes

| Name           | Log2 Fold Change | Standard Error | p-value   | Category    | MIT Annotation                              |
|----------------|------------------|----------------|-----------|-------------|---------------------------------------------|
| <b>PMM0690</b> | Inf              | NA             | 0.00E+00  | Adaptations | hli21 possible high light inducible protein |
| PMM0815        | 4.86             | 0.53           | 3.51E-163 | Adaptations | hli19 possible high light inducible protein |
| PMM1404        | 4.57             | 0.14           | 3.15E-84  | Adaptations | hli5 possible high light inducible protein  |
| <b>PMM1390</b> | 4.81             | 0.89           | 2.27E-93  | Adaptations | hli10 possible high light inducible protein |
| PMM0816        | 4.64             | 1.32           | 2.55E-90  | Adaptations | hli18 possible high light inducible protein |
| PMM1396        | 4.17             | 0.14           | 1.24E-19  | Adaptations | hli9 possible high light inducible protein  |
| <b>PMM0689</b> | 4.28             | 1.32           | 4.68E-44  | Adaptations | hli22 possible high light inducible protein |
| PMM1397        | 3.91             | 0.26           | 9.63E-59  | Adaptations | hli8 possible high light inducible protein  |
| PMM1385        | 3.72             | 0.41           | 6.12E-06  | Adaptations | hli11 possible high light inducible protein |
| PMM1398        | 3.64             | 0.91           | 1.13E-20  | Adaptations | hli7 possible high light inducible protein  |
| PMM1384        | 3.47             | 0.22           | 3.19E-07  | Adaptations | hli12 possible high light inducible protein |
| PMM1399        | 3.36             | 0.54           | 1.35E-18  | Adaptations | hli6 possible high light inducible protein  |
| PMM0817        | 3.14             | 0.44           | 3.74E-16  | Adaptations | hli17 possible high light inducible protein |
| PMM0818        | 2.92             | 0.55           | 3.61E-08  | Adaptations | hli16 possible high light inducible protein |
| PMM1135        | 2.58             | 0.48           | 1.64E-04  | Adaptations | hli14 possible high light inducible protein |

Note those rows that are in bold and labeled with an \* were identified as differentially expressed in the Tolonen et. al 2006 paper
