# Supplementary material for: Nitrogen cost minimization is promoted by structural changes in the transcriptome of N-deprived Prochlorococcus cells
Source: PubMed Central journal article supplement (PMC5607370; doi:10.1038/ismej.2017.88), 2017-06-06
Supplement: ismej201788x15.pdf [file ismej201788x15.pdf]

Table S8. N-Replete Transcriptional Start Sites at 12 Hours Post Starvation Identified by TSSAR.

| Position | Strand     | ID   | Score | Difference | p-Value | Positional I Class                                            | Comment |
|----------|------------|------|-------|------------|---------|---------------------------------------------------------------|---------|
| 158 +    | TSS_000004 | 1000 | 744   | 0          | 5 P     | 16nt upstream of gene PMM0001;                                |         |
| 1089 +   | TSS_000013 | 1000 | 100   | 0          | 9 IP    | within gene(s) PMM0001; 244nt upstream of gene PMM0002;       |         |
| 1991 +   | TSS_000015 | 1000 | 172   | 0          | 4 IP    | within gene(s) PMM0002; 53nt upstream of gene PMM0003;        |         |
| 2084 +   | TSS_000019 | 1000 | 2221  | 0          | 2 I     | within gene(s) PMM0003;                                       |         |
| 2919 -   | TSS_009685 | 1000 | 52    | 0          | 1 Ai    | antisense to gene(s) PMM0003;                                 |         |
| 3197 +   | TSS_000026 | 1000 | 138   | 0          | 5 I     | within gene(s) PMM0003;                                       |         |
| 8361 -   | TSS_009699 | 1000 | 614   | 0          | 0 P     | 33nt upstream of gene PMM0005;                                |         |
| 9568 +   | TSS_000040 | 1000 | 184   | 0          | 5 Ai    | antisense to gene(s) PMM0007;                                 |         |
| 10218 -  | TSS_009703 | 1000 | 460   | 0          | 0 I     | within gene(s) PMM0007;                                       |         |
| 10339 +  | TSS_000043 | 1000 | 1555  | 0          | 4 P     | 28nt upstream of gene PMM0008;                                |         |
| 11776 +  | TSS_000054 | 1000 | 162   | 0          | 4 P     | 17nt upstream of gene PMM0010;                                |         |
| 12361 +  | TSS_000061 | 1000 | 152   | 0          | 0 I     | within gene(s) PMM0010;                                       |         |
| 14116 -  | TSS_009714 | 1000 | 1451  | 0          | 2 Ai    | antisense to gene(s) PMM0011;                                 |         |
| 14141 +  | TSS_000072 | 1000 | 65    | 0          | 0 I     | within gene(s) PMM0011;                                       |         |
| 14568 +  | TSS_000073 | 1000 | 531   | 0          | 1 P     | 17nt upstream of gene PMM0012;                                |         |
| 14769 -  | TSS_009717 | 1000 | 133   | 0          | 0 Ai    | antisense to gene(s) PMM0012;                                 |         |
| 14964 -  | TSS_009718 | 1000 | 536   | 0          | 6 Ai    | antisense to gene(s) PMM0012;                                 |         |
| 15347 +  | TSS_000080 | 1000 | 83    | 0          | 0 I     | within gene(s) PMM0012;                                       |         |
| 16016 +  | TSS_000083 | 1000 | 27455 | 0          | 3 P     | 2nt upstream of gene PMM0013;                                 |         |
| 16255 -  | TSS_009725 | 1000 | 176   | 0          | 1 Ai    | antisense to gene(s) PMM0013;                                 |         |
| 17671 +  | TSS_000101 | 1000 | 471   | 0          | 2 P     | 41nt upstream of gene PMM0015;                                |         |
| 18267 +  | TSS_000109 | 1000 | 1171  | 0          | 4 P     | 16nt upstream of gene PMM0016;                                |         |
| 20649 +  | TSS_000146 | 1000 | 44    | 0          | 2 I     | within gene(s) PMM0019;                                       |         |
| 23179 -  | TSS_009753 | 1000 | 110   | 0          | 0 I     | within gene(s) PMM0022;                                       |         |
| 24122 +  | TSS_000151 | 1000 | 1553  | 0          | 3 P     | 28nt upstream of gene PMM0023;                                |         |
| 24575 -  | TSS_009757 | 1000 | 103   | 0          | 0 Ai    | antisense to gene(s) PMM0023;                                 |         |
| 24586 -  | TSS_009758 | 1000 | 52    | 0          | 0 Ai    | antisense to gene(s) PMM0023;                                 |         |
| 25810 -  | TSS_009768 | 1000 | 51    | 0          | 0 I     | within gene(s) PMM0024;                                       |         |
| 25886 -  | TSS_009770 | 1000 | 1299  | 0          | 1 I     | within gene(s) PMM0024;                                       |         |
| 26468 -  | TSS_009772 | 1000 | 258   | 0          | 0 I     | within gene(s) PMM0025;                                       |         |
| 27201 +  | TSS_000176 | 1000 | 72    | 0          | 0 P     | 86nt upstream of gene PMM0026;                                |         |
| 27273 +  | TSS_000177 | 1000 | 2551  | 0          | 2 P     | 14nt upstream of gene PMM0026;                                |         |
| 27367 +  | TSS_000180 | 1000 | 999   | 0          | 0 I     | within gene(s) PMM0026;                                       |         |
| 27478 -  | TSS_009780 | 1000 | 399   | 0          | 1 Ai    | 235nt upstream of gene PMM0025; antisense to gene(s) PMM0026; |         |
| 27552 +  | TSS_000183 | 1000 | 93    | 0          | 5 I     | within gene(s) PMM0026;                                       |         |
| 27755 +  | TSS_000188 | 1000 | 784   | 0          | 0 IP    | within gene(s) PMM0026; 92nt upstream of gene PMM0027;        |         |
| 30271 +  | TSS_000196 | 1000 | 109   | 0          | 2 I     | within gene(s) PMM0030;                                       |         |
| 30946 -  | TSS_009795 | 1000 | 293   | 0          | 2 P     | 16nt upstream of gene PMM0031;                                |         |
| 31393 -  | TSS_009806 | 1000 | 361   | 0          | 2 I     | within gene(s) PMM0032;                                       |         |
| 31536 -  | TSS_009812 | 1000 | 8798  | 0          | 2 P     | 16nt upstream of gene PMM0032;                                |         |
| 31640 +  | TSS_000206 | 1000 | 307   | 0          | 1 Ai    | antisense to gene(s) PMM0033;                                 |         |
| 31718 +  | TSS_000208 | 1000 | 99    | 0          | 0 Ai    | antisense to gene(s) PMM0033;                                 |         |
| 32109 -  | TSS_009817 | 1000 | 90    | 0          | 1 P     | 18nt upstream of gene PMM0033;                                |         |
| 32317 +  | TSS_000281 | 1000 | 3951  | 0          | 4 P     | 18nt upstream of gene PMM0034;                                |         |
| 32374 +  | TSS_000209 | 1000 | 87    | 0          | 0 I     | within gene(s) PMM0034;                                       |         |
| 33332 +  | TSS_000214 | 1000 | 288   | 0          | 1 Ai    | antisense to gene(s) PMM0035;                                 |         |
| 33713 -  | TSS_009835 | 1000 | 2238  | 0          | 2 P     | 16nt upstream of gene PMM0035;                                |         |
| 34926 +  | TSS_000220 | 1000 | 446   | 0          | 0 I     | within gene(s) PMM0037;                                       |         |
| 37053 -  | TSS_009843 | 1000 | 140   | 0          | 0 Ai    | antisense to gene(s) PMM0038;                                 |         |
| 37342 +  | TSS_000234 | 1000 | 949   | 0          | 3 P     | 18nt upstream of gene PMM0039;                                |         |
| 41761 -  | TSS_009854 | 1000 | 99    | 0          | 0 I     | within gene(s) PMM0042;                                       |         |
| 43346 +  | TSS_000247 | 1000 | 245   | 0          | 0 Ai    | antisense to gene(s) PMM0043;                                 |         |
| 44029 +  | TSS_000249 | 1000 | 671   | 0          | 1 Ai    | antisense to gene(s) PMM0043;                                 |         |
| 44220 -  | TSS_009872 | 1000 | 1036  | 0          | 0 P     | 30nt upstream of gene PMM0043;                                |         |
| 44838 -  | TSS_009876 | 1000 | 300   | 0          | 2 Ai    | antisense to gene(s) PMM0044;                                 |         |
| 47672 -  | TSS_009885 | 1000 | 155   | 0          | 5 I     | within gene(s) PMM0045;                                       |         |
| 47817 +  | TSS_000268 | 1000 | 31    | 0          | 1 Ai    | antisense to gene(s) PMM0045;                                 |         |
| 47824 +  | TSS_000363 | 1000 | 4286  | 0          | 4 Ai    | antisense to gene(s) PMM0045;                                 |         |
| 49002 +  | TSS_000275 | 1000 | 2951  | 0          | 3 P     | 15nt upstream of gene PMM0046;                                |         |
| 49816 -  | TSS_009890 | 1000 | 79    | 0          | 0 I     | within gene(s) PMM0047;                                       |         |
| 50616 +  | TSS_000283 | 1000 | 577   | 0          | 0 P     | 56nt upstream of gene PMM0048;                                |         |
| 52823 +  | TSS_000305 | 1000 | 366   | 0          | 5 P     | 44nt upstream of gene PMM0050;                                |         |
| 52948 -  | TSS_009900 | 1000 | 252   | 0          | 1 PAi   | 186nt upstream of gene PMM0049; antisense to gene(s) PMM0050; |         |
| 54377 -  | TSS_009912 | 1000 | 510   | 0          | 36 I    | within gene(s) PMM0051;                                       |         |
| 54638 +  | TSS_000315 | 1000 | 107   | 0          | 0 Ai    | antisense to gene(s) PMM0051;                                 |         |
| 55050 +  | TSS_000316 | 1000 | 105   | 0          | 0 P     | 16nt upstream of gene PMM0052;                                |         |
| 56405 +  | TSS_000317 | 1000 | 127   | 0          | 1 O     | -                                                             |         |
| 56601 -  | TSS_009928 | 1000 | 2687  | 0          | 0 O     | -                                                             |         |
| 58622 -  | TSS_014433 | 1000 | 200   | 0          | 3 I     | within gene(s) PMM0055;                                       |         |
| 58796 +  | TSS_000323 | 1000 | 7021  | 0          | 1 P     | 207nt upstream of gene PMM0056;                               |         |
| 59479 +  | TSS_000328 | 1000 | 1068  | 0          | 1 P     | 17nt upstream of gene PMM0057;                                |         |
| 59995 -  | TSS_009950 | 1000 | 92    | 0          | 3 Ai    | antisense to gene(s) PMM0057;                                 |         |
| 61132 +  | TSS_000334 | 1000 | 67    | 0          | 2 I     | within gene(s) PMM0057;                                       |         |
| 61620 -  | TSS_009951 | 1000 | 71    | 0          | 3 Ai    | antisense to gene(s) PMM0057;                                 |         |
| 63006 +  | TSS_000337 | 1000 | 1431  | 0          | 1 IP    | within gene(s) PMM0057; 126nt upstream of gene PMM0058;       |         |
| 63116 +  | TSS_000339 | 1000 | 388   | 0          | 1 P     | 16nt upstream of gene PMM0058;                                |         |
| 63461 +  | TSS_000341 | 1000 | 131   | 0          | 1 I     | within gene(s) PMM0058;                                       |         |
| 65570 -  | TSS_009963 | 1000 | 153   | 0          | 3 P     | 121nt upstream of gene PMM0059;                               |         |
| 65752 +  | TSS_000347 | 1000 | 284   | 0          | 1 P     | 89nt upstream of gene PMM0060;                                |         |

|          |            |      |       |         |      |                                                         |
|----------|------------|------|-------|---------|------|---------------------------------------------------------|
| 66139 +  | TSS_000348 | 1000 | 39    | 0       | 0 I  | within gene(s) PMM0060;                                 |
| 66151 +  | TSS_000349 | 1000 | 141   | 0       | 0 I  | within gene(s) PMM0060;                                 |
| 66155 -  | TSS_009967 | 1000 | 21    | 0       | 0 Ai | antisense to gene(s) PMM0060;                           |
| 66390 -  | TSS_009969 | 1000 | 20    | 0       | 0 Ai | antisense to gene(s) PMM0060;                           |
| 66518 +  | TSS_000351 | 1000 | 178   | 0       | 2 I  | within gene(s) PMM0060;                                 |
| 66815 +  | TSS_000353 | 1000 | 102   | 0       | 0 I  | within gene(s) PMM0060;                                 |
| 66972 -  | TSS_009974 | 1000 | 99    | 0       | 2 Ai | antisense to gene(s) PMM0060;                           |
| 67529 -  | TSS_009976 | 1000 | 467   | 0       | 2 P  | 16nt upstream of gene PMM0061;                          |
| 67586 +  | TSS_000359 | 1000 | 3300  | 0       | 2 P  | 66nt upstream of gene PMM0062;                          |
| 67893 +  | TSS_000364 | 1000 | 547   | 0       | 6 I  | within gene(s) PMM0063;                                 |
| 68237 +  | TSS_000375 | 1000 | 208   | 0       | 3 I  | within gene(s) PMM0063;                                 |
| 68394 -  | TSS_009990 | 1000 | 94    | 0       | 0 Ai | antisense to gene(s) PMM0063;                           |
| 68453 +  | TSS_000389 | 1000 | 196   | 0       | 1 I  | within gene(s) PMM0063;                                 |
| 69179 -  | TSS_009999 | 1000 | 354   | 0       | 2 IP | within gene(s) PMM0065; 143nt upstream of gene PMM0064; |
| 69361 -  | TSS_010003 | 1000 | 117   | 0       | 0 I  | within gene(s) PMM0065;                                 |
| 70887 -  | TSS_010014 | 1000 | 75    | 0       | 0 I  | within gene(s) PMM0065;                                 |
| 72400 -  | TSS_010021 | 1000 | 168   | 0       | 0 P  | 32nt upstream of gene PMM0068;                          |
| 72542 +  | TSS_000416 | 1000 | 39    | 0       | 2 I  | within gene(s) PMM0069;                                 |
| 73169 -  | TSS_010023 | 1000 | 65    | 0       | 0 Ai | antisense to gene(s) PMM0069;                           |
| 73910 -  | TSS_010025 | 1000 | 129   | 0       | 0 Ai | antisense to gene(s) PMM0069;                           |
| 74118 -  | TSS_010027 | 1000 | 327   | 0       | 0 Ai | antisense to gene(s) PMM0069;                           |
| 75013 +  | TSS_000420 | 1000 | 70    | 0       | 0 Ai | antisense to gene(s) PMM0070;                           |
| 78158 -  | TSS_010048 | 1000 | 294   | 0       | 1 I  | within gene(s) PMM0073;                                 |
| 78218 -  | TSS_010050 | 1000 | 428   | 0       | 1 I  | within gene(s) PMM0073;                                 |
| 78295 -  | TSS_010052 | 1000 | 228   | 0       | 0 I  | within gene(s) PMM0073;                                 |
| 78481 -  | TSS_010056 | 1000 | 377   | 0       | 0 I  | within gene(s) PMM0073;                                 |
| 79154 -  | TSS_010069 | 1000 | 732   | 0       | 4 P  | 33nt upstream of gene PMM0073;                          |
| 79823 +  | TSS_000434 | 1000 | 69    | 0       | 0 P  | 22nt upstream of gene PMM0075;                          |
| 80192 -  | TSS_010074 | 1000 | 126   | 0       | 0 Ai | antisense to gene(s) PMM0075;                           |
| 80289 +  | TSS_000436 | 1000 | 106   | 0       | 0 I  | within gene(s) PMM0075;                                 |
| 80352 +  | TSS_000438 | 1000 | 127   | 0       | 3 I  | within gene(s) PMM0075;                                 |
| 81157 +  | TSS_000443 | 1000 | 77    | 0       | 0 P  | 14nt upstream of gene PMM0076;                          |
| 82018 -  | TSS_010082 | 1000 | 86    | 0       | 3 Ai | antisense to gene(s) PMM0076;                           |
| 82229 -  | TSS_010085 | 1000 | 198   | 0       | 0 Ai | antisense to gene(s) PMM0076;                           |
| 83123 +  | TSS_000448 | 1000 | 88    | 0       | 0 I  | within gene(s) PMM0077;                                 |
| 86371 -  | TSS_010094 | 1000 | 77    | 0       | 0 I  | within gene(s) PMM0081;                                 |
| 88867 +  | TSS_000462 | 1000 | 128   | 0       | 6 I  | within gene(s) PMM0083;                                 |
| 89200 -  | TSS_010103 | 1000 | 192   | 0       | 4 Ai | antisense to gene(s) PMM0083;                           |
| 89701 -  | TSS_010107 | 1000 | 70    | 0       | 0 Ai | antisense to gene(s) PMM0083;                           |
| 90051 +  | TSS_000469 | 1000 | 158   | 0       | 1 I  | within gene(s) PMM0084;                                 |
| 91200 +  | TSS_000478 | 1000 | 3458  | 0       | 7 IP | within gene(s) PMM0084; 60nt upstream of gene PMM0085;  |
| 91487 -  | TSS_010116 | 1000 | 226   | 0       | 0 Ai | antisense to gene(s) PMM0085;                           |
| 91506 +  | TSS_000484 | 1000 | 99    | 0       | 0 I  | within gene(s) PMM0085;                                 |
| 91711 -  | TSS_010119 | 1000 | 600   | 0       | 1 Ai | antisense to gene(s) PMM0085;                           |
| 92216 -  | TSS_010120 | 1000 | 161   | 0       | 0 I  | within gene(s) PMM0086;                                 |
| 92293 -  | TSS_010121 | 1000 | 2236  | 0       | 1 P  | 20nt upstream of gene PMM0086;                          |
| 92350 +  | TSS_000490 | 1000 | 877   | 0       | 1 P  | 40nt upstream of gene PMM0087;                          |
| 92747 +  | TSS_000494 | 1000 | 1892  | 0       | 2 P  | 17nt upstream of gene PMM0088;                          |
| 93143 -  | TSS_010124 | 1000 | 624   | 0       | 2 O  | -                                                       |
| 94679 -  | TSS_010125 | 1000 | 309   | 0       | 3 Ai | antisense to gene(s) PMM0089;                           |
| 96428 +  | TSS_000512 | 1000 | 261   | 0       | 2 P  | 24nt upstream of gene PMM0091;                          |
| 97181 +  | TSS_000526 | 1000 | 35340 | 0       | 10 P | 19nt upstream of gene PMM0093;                          |
| 98015 -  | TSS_010136 | 1000 | 605   | 0       | 4 I  | within gene(s) PMM0095;                                 |
| 98676 -  | TSS_010143 | 1000 | 198   | 0       | 1 P  | 16nt upstream of gene PMM0095;                          |
| 98732 +  | TSS_000529 | 1000 | 15    | 7.5E-10 | 0 Ad | antisense to gene(s) PMM0096 (4nt downstream);          |
| 99177 +  | TSS_000531 | 1000 | 59    | 0       | 0 Ai | antisense to gene(s) PMM0096;                           |
| 101137 + | TSS_000534 | 1000 | 114   | 0       | 0 Ai | antisense to gene(s) PMM0098;                           |
| 102827 + | TSS_000540 | 1000 | 71    | 0       | 3 I  | within gene(s) PMM0099;                                 |
| 104291 + | TSS_000549 | 1000 | 72    | 0       | 0 I  | within gene(s) PMM0100;                                 |
| 105240 - | TSS_010162 | 1000 | 95    | 0       | 0 I  | within gene(s) PMM0101;                                 |
| 105437 - | TSS_010164 | 1000 | 316   | 0       | 3 I  | within gene(s) PMM0101;                                 |
| 105586 - | TSS_010168 | 1000 | 62    | 0       | 3 I  | within gene(s) PMM0101;                                 |
| 105798 - | TSS_010171 | 1000 | 82    | 0       | 2 I  | within gene(s) PMM0101;                                 |
| 105946 - | TSS_010174 | 1000 | 618   | 0       | 2 P  | 30nt upstream of gene PMM0101;                          |
| 106019 + | TSS_000552 | 1000 | 64    | 0       | 0 P  | 4nt upstream of gene PMM0102;                           |
| 107782 - | TSS_010180 | 1000 | 94    | 0       | 1 I  | within gene(s) PMM0103;                                 |
| 107836 - | TSS_010181 | 1000 | 148   | 0       | 0 I  | within gene(s) PMM0103;                                 |
| 109596 + | TSS_000557 | 1000 | 56    | 0       | 0 Ai | antisense to gene(s) PMM0105;                           |
| 109827 + | TSS_000558 | 1000 | 53    | 0       | 0 Ai | antisense to gene(s) PMM0105;                           |
| 110281 + | TSS_000560 | 1000 | 1159  | 0       | 1 Ai | antisense to gene(s) PMM0106;                           |
| 110766 - | TSS_010191 | 1000 | 15987 | 0       | 0 P  | 12nt upstream of gene PMM0106;                          |
| 110958 + | TSS_000569 | 1000 | 52    | 0       | 0 I  | within gene(s) PMM0107;                                 |
| 113037 + | TSS_000572 | 1000 | 68    | 0       | 0 P  | 46nt upstream of gene PMM0111;                          |
| 114786 + | TSS_000576 | 1000 | 166   | 0       | 1 Ai | antisense to gene(s) PMM0114;                           |
| 114981 - | TSS_010202 | 1000 | 91    | 0       | 0 IP | within gene(s) PMM0115; 35nt upstream of gene PMM0114;  |
| 115971 + | TSS_000583 | 1000 | 140   | 0       | 0 Ai | antisense to gene(s) PMM0115;                           |
| 116412 - | TSS_010216 | 1000 | 52    | 0       | 7 P  | 9nt upstream of gene PMM0115;                           |
| 116480 - | TSS_010218 | 1000 | 12000 | 0       | 0 P  | 20nt upstream of gene PMM0116;                          |
| 118346 - | TSS_010221 | 1000 | 206   | 0       | 0 Ai | antisense to gene(s) PMM0118;                           |
| 119698 - | TSS_010226 | 1000 | 202   | 0       | 2 P  | 16nt upstream of gene PMM0120;                          |
| 119798 + | TSS_000598 | 1000 | 1770  | 0       | 2 P  | 28nt upstream of gene PMM0121;                          |

|          |            |      |       |   |       |                                                                         |
|----------|------------|------|-------|---|-------|-------------------------------------------------------------------------|
| 119905 + | TSS_000600 | 1000 | 80    | 0 | 0 I   | within gene(s) PMM0121;                                                 |
| 120990 - | TSS_010232 | 1000 | 789   | 0 | 1 IP  | within gene(s) PMM0123; 240nt upstream of gene PMM0122;                 |
| 121450 - | TSS_010237 | 1000 | 124   | 0 | 0 I   | within gene(s) PMM0123;                                                 |
| 121764 - | TSS_010239 | 1000 | 130   | 0 | 0 P   | 29nt upstream of gene PMM0123;                                          |
| 122897 + | TSS_000608 | 1000 | 175   | 0 | 2 O   | -                                                                       |
| 123251 + | TSS_000609 | 1000 | 910   | 0 | 1 P   | 68nt upstream of gene PMM0126;                                          |
| 123779 + | TSS_000612 | 1000 | 1002  | 0 | 0 I   | within gene(s) PMM0126;                                                 |
| 124013 - | TSS_010253 | 1000 | 75    | 0 | 1 Ai  | antisense to gene(s) PMM0126;                                           |
| 125323 + | TSS_000621 | 1000 | 2270  | 0 | 1 P   | 35nt upstream of gene PMM0128;                                          |
| 125778 + | TSS_000632 | 1000 | 80    | 0 | 23 I  | within gene(s) PMM0128;                                                 |
| 126175 - | TSS_010263 | 1000 | 108   | 0 | 0 I   | within gene(s) PMM0129;                                                 |
| 129278 - | TSS_010273 | 1000 | 107   | 0 | 0 I   | within gene(s) PMM0131;                                                 |
| 130071 - | TSS_010276 | 1000 | 346   | 0 | 3 P   | 34nt upstream of gene PMM0131;                                          |
| 130794 + | TSS_000649 | 1000 | 3266  | 0 | 1 Ai  | antisense to gene(s) PMM0133;                                           |
| 130945 + | TSS_000652 | 1000 | 143   | 0 | 0 Ai  | antisense to gene(s) PMM0133;                                           |
| 132109 + | TSS_001026 | 1000 | 2564  | 0 | 3 P   | 39nt upstream of gene PMM0134;                                          |
| 132594 + | TSS_000675 | 1000 | 88    | 0 | 0 I   | within gene(s) PMM0134;                                                 |
| 132850 - | TSS_010283 | 1000 | 306   | 0 | 0 Ai  | antisense to gene(s) PMM0134;                                           |
| 133237 + | TSS_000679 | 1000 | 79    | 0 | 12 I  | within gene(s) PMM0135;                                                 |
| 134228 - | TSS_010290 | 1000 | 1765  | 0 | 6 Ai  | antisense to gene(s) PMM0135;                                           |
| 134332 + | TSS_000689 | 1000 | 592   | 0 | 1 P   | 17nt upstream of gene PMM0136;                                          |
| 135334 + | TSS_000693 | 1000 | 264   | 0 | 2 IP  | within gene(s) PMM0136; 37nt upstream of gene PMM0137;                  |
| 136633 + | TSS_000698 | 1000 | 89    | 0 | 0 I   | within gene(s) PMM0138;                                                 |
| 139049 + | TSS_000701 | 1000 | 304   | 0 | 0 P   | 49nt upstream of gene PMM0142;                                          |
| 139538 - | TSS_010300 | 1000 | 62    | 0 | 0 IAd | within gene(s) PMM0143; antisense to gene(s) PMM0142 (22nt downstream); |
| 139888 + | TSS_000704 | 1000 | 891   | 0 | 1 Ai  | antisense to gene(s) PMM0143;                                           |
| 140081 - | TSS_010302 | 1000 | 623   | 0 | 0 I   | within gene(s) PMM0143;                                                 |
| 140446 - | TSS_010303 | 1000 | 129   | 0 | 1 P   | 20nt upstream of gene PMM0143;                                          |
| 141905 - | TSS_010312 | 1000 | 534   | 0 | 0 P   | 38nt upstream of gene PMM0144;                                          |
| 141924 + | TSS_000711 | 1000 | 249   | 0 | 5 P   | 34nt upstream of gene PMM0145;                                          |
| 142730 - | TSS_010313 | 1000 | 52    | 0 | 1 Ai  | antisense to gene(s) PMM0146;                                           |
| 143021 - | TSS_010320 | 1000 | 128   | 0 | 2 I   | within gene(s) PMM0147;                                                 |
| 143488 - | TSS_010323 | 1000 | 407   | 0 | 3 I   | within gene(s) PMM0147;                                                 |
| 143883 - | TSS_010331 | 1000 | 419   | 0 | 12 P  | 14nt upstream of gene PMM0147;                                          |
| 143931 + | TSS_000726 | 1000 | 304   | 0 | 3 P   | 23nt upstream of gene PMM0148;                                          |
| 144023 + | TSS_000727 | 1000 | 62    | 0 | 0 I   | within gene(s) PMM0148;                                                 |
| 144701 + | TSS_000732 | 1000 | 2018  | 0 | 2 P   | 15nt upstream of gene PMM0149;                                          |
| 144965 + | TSS_000739 | 1000 | 311   | 0 | 6 I   | within gene(s) PMM0149;                                                 |
| 145139 + | TSS_000744 | 1000 | 105   | 0 | 0 I   | within gene(s) PMM0149;                                                 |
| 145211 + | TSS_000745 | 1000 | 259   | 0 | 3 I   | within gene(s) PMM0149;                                                 |
| 145511 + | TSS_000754 | 1000 | 272   | 0 | 1 I   | within gene(s) PMM0149;                                                 |
| 145715 + | TSS_000765 | 1000 | 208   | 0 | 9 I   | within gene(s) PMM0149;                                                 |
| 146423 - | TSS_010346 | 1000 | 280   | 0 | 0 Ai  | antisense to gene(s) PMM0149;                                           |
| 146611 + | TSS_000783 | 1000 | 170   | 0 | 1 IP  | within gene(s) PMM0149; 202nt upstream of gene PMM0150;                 |
| 146794 + | TSS_000785 | 1000 | 11580 | 0 | 2 P   | 19nt upstream of gene PMM0150;                                          |
| 147332 + | TSS_000792 | 1000 | 433   | 0 | 0 I   | within gene(s) PMM0150;                                                 |
| 147731 - | TSS_010351 | 1000 | 104   | 0 | 1 Ai  | antisense to gene(s) PMM0150;                                           |
| 147807 + | TSS_000799 | 1000 | 264   | 0 | 0 I   | within gene(s) PMM0150;                                                 |
| 148260 - | TSS_010354 | 1000 | 76    | 0 | 0 Ai  | antisense to gene(s) PMM0150;                                           |
| 148515 + | TSS_000807 | 1000 | 268   | 0 | 1 P   | 169nt upstream of gene PMM0151;                                         |
| 149427 + | TSS_000811 | 1000 | 423   | 0 | 1 P   | 20nt upstream of gene PMM0152;                                          |
| 150063 + | TSS_000814 | 1000 | 62    | 0 | 0 I   | within gene(s) PMM0152;                                                 |
| 150290 + | TSS_000819 | 1000 | 302   | 0 | 0 I   | within gene(s) PMM0152;                                                 |
| 150387 - | TSS_010360 | 1000 | 218   | 0 | 4 Ai  | antisense to gene(s) PMM0152;                                           |
| 151109 - | TSS_010365 | 1000 | 100   | 0 | 4 I   | within gene(s) PMM0153;                                                 |
| 151121 + | TSS_000823 | 1000 | 92    | 0 | 0 Ai  | antisense to gene(s) PMM0153;                                           |
| 151351 - | TSS_010369 | 1000 | 156   | 0 | 0 I   | within gene(s) PMM0153;                                                 |
| 151412 + | TSS_000826 | 1000 | 451   | 0 | 2 PAi | 165nt upstream of gene PMM0154; antisense to gene(s) PMM0153;           |
| 151546 - | TSS_010370 | 1000 | 165   | 0 | 2 P   | 47nt upstream of gene PMM0153;                                          |
| 151556 + | TSS_000828 | 1000 | 1131  | 0 | 5 P   | 21nt upstream of gene PMM0154;                                          |
| 151821 - | TSS_010375 | 1000 | 53    | 0 | 0 Ai  | antisense to gene(s) PMM0154;                                           |
| 152951 - | TSS_010378 | 1000 | 92    | 0 | 0 I   | within gene(s) PMM0156;                                                 |
| 153992 - | TSS_010384 | 1000 | 56    | 0 | 0 IP  | within gene(s) PMM0158; 190nt upstream of gene PMM0157;                 |
| 154617 - | TSS_010397 | 1000 | 3746  | 0 | 36 IP | within gene(s) PMM0159; 214nt upstream of gene PMM0158;                 |
| 154964 - | TSS_010404 | 1000 | 477   | 0 | 0 I   | within gene(s) PMM0159;                                                 |
| 155061 - | TSS_010406 | 1000 | 296   | 0 | 5 P   | 18nt upstream of gene PMM0159;                                          |
| 155927 - | TSS_010409 | 1000 | 69    | 0 | 3 I   | within gene(s) PMM0160;                                                 |
| 156247 - | TSS_010412 | 1000 | 60    | 0 | 4 P   | 16nt upstream of gene PMM0160;                                          |
| 157478 - | TSS_010426 | 1000 | 360   | 0 | 0 P   | 26nt upstream of gene PMM0161;                                          |
| 160552 - | TSS_010442 | 1000 | 78    | 0 | 1 I   | within gene(s) PMM0164;                                                 |
| 160684 - | TSS_010443 | 1000 | 1278  | 0 | 5 P   | 18nt upstream of gene PMM0164;                                          |
| 161048 + | TSS_000847 | 1000 | 460   | 0 | 0 P   | 21nt upstream of gene PMM0166;                                          |
| 162263 - | TSS_010446 | 1000 | 478   | 0 | 2 P   | 61nt upstream of gene PMM0167;                                          |
| 162318 + | TSS_000854 | 1000 | 1230  | 0 | 2 P   | 21nt upstream of gene PMM0168;                                          |
| 163802 - | TSS_010454 | 1000 | 368   | 0 | 0 P   | 32nt upstream of gene PMM0169;                                          |
| 163830 + | TSS_000860 | 1000 | 317   | 0 | 0 I   | within gene(s) PMM0170;                                                 |
| 165910 + | TSS_000866 | 1000 | 16802 | 0 | 3 P   | 15nt upstream of gene PMM0172;                                          |
| 166112 - | TSS_010459 | 1000 | 94    | 0 | 2 PAi | 226nt upstream of gene PMM0171; antisense to gene(s) PMM0172;           |
| 166240 + | TSS_000878 | 1000 | 58    | 0 | 3 I   | within gene(s) PMM0172;                                                 |
| 166516 + | TSS_000889 | 1000 | 143   | 0 | 7 I   | within gene(s) PMM0172;                                                 |
| 172122 - | TSS_010469 | 1000 | 142   | 0 | 0 Ai  | antisense to gene(s) PMM0177;                                           |

|          |            |      |       |   |       |                                                              |
|----------|------------|------|-------|---|-------|--------------------------------------------------------------|
| 173360 - | TSS_010474 | 1000 | 543   | 0 | 2 P   | 17nt upstream of gene PMM0179;                               |
| 173404 + | TSS_000919 | 1000 | 1031  | 0 | 0 P   | 16nt upstream of gene PMM0180;                               |
| 175816 + | TSS_000926 | 1000 | 65    | 0 | 0 I   | within gene(s) PMM0184;                                      |
| 176333 + | TSS_000927 | 1000 | 51    | 0 | 0 P   | 11nt upstream of gene PMM0185;                               |
| 176661 + | TSS_000929 | 1000 | 56    | 0 | 5 I   | within gene(s) PMM0185;                                      |
| 178914 - | TSS_010487 | 1000 | 1090  | 0 | 2 I   | within gene(s) PMM0187;                                      |
| 180315 + | TSS_000932 | 1000 | 251   | 0 | 0 Ai  | antisense to gene(s) PMM0188;                                |
| 180517 + | TSS_000934 | 1000 | 83    | 0 | 0 Ai  | antisense to gene(s) PMM0188;                                |
| 182433 - | TSS_010492 | 1000 | 529   | 0 | 2 PAi | 92nt upstream of gene PMM0189; antisense to gene(s) PMM0190; |
| 183419 - | TSS_010494 | 1000 | 176   | 0 | 0 I   | within gene(s) PMM0191;                                      |
| 183523 + | TSS_000939 | 1000 | 73    | 0 | 0 Ai  | antisense to gene(s) PMM0191;                                |
| 185776 + | TSS_000945 | 1000 | 85    | 0 | 0 I   | within gene(s) PMM0192;                                      |
| 187884 - | TSS_010503 | 1000 | 97    | 0 | 0 IP  | within gene(s) PMM0194; 90nt upstream of gene PMM0193;       |
| 188529 + | TSS_000951 | 1000 | 53    | 0 | 0 Ai  | antisense to gene(s) PMM0194;                                |
| 188865 + | TSS_000952 | 1000 | 1101  | 0 | 1 P   | 18nt upstream of gene PMM0195;                               |
| 189007 + | TSS_000955 | 1000 | 379   | 0 | 1 I   | within gene(s) PMM0195;                                      |
| 189333 + | TSS_000960 | 1000 | 71    | 0 | 4 I   | within gene(s) PMM0195;                                      |
| 193271 - | TSS_010512 | 1000 | 64    | 0 | 0 IP  | within gene(s) PMM0199; 222nt upstream of gene PMM0198;      |
| 193821 + | TSS_000977 | 1000 | 78    | 0 | 0 Ai  | antisense to gene(s) PMM0199;                                |
| 195266 + | TSS_000983 | 1000 | 1073  | 0 | 0 Ai  | antisense to gene(s) PMM0201;                                |
| 195331 - | TSS_015322 | 1000 | 246   | 0 | 3 I   | within gene(s) PMM0201;                                      |
| 195809 - | TSS_010551 | 1000 | 277   | 0 | 3 I   | within gene(s) PMM0202;                                      |
| 196137 - | TSS_015338 | 1000 | 15681 | 0 | 5 P   | 169nt upstream of gene PMM0202;                              |
| 196509 + | TSS_000993 | 1000 | 122   | 0 | 1 Ai  | antisense to gene(s) PMM0203;                                |
| 196639 - | TSS_010572 | 1000 | 234   | 0 | 2 I   | within gene(s) PMM0203;                                      |
| 197001 - | TSS_010577 | 1000 | 1314  | 0 | 1 IP  | within gene(s) PMM0204; 133nt upstream of gene PMM0203;      |
| 197448 - | TSS_010588 | 1000 | 778   | 0 | 3 IP  | within gene(s) PMM0205; 88nt upstream of gene PMM0204;       |
| 197685 + | TSS_001000 | 1000 | 213   | 0 | 0 Ai  | antisense to gene(s) PMM0205;                                |
| 197771 - | TSS_010596 | 1000 | 190   | 0 | 0 I   | within gene(s) PMM0205;                                      |
| 197876 - | TSS_010601 | 1000 | 142   | 0 | 5 I   | within gene(s) PMM0205;                                      |
| 198069 - | TSS_010604 | 1000 | 602   | 0 | 4 P   | 34nt upstream of gene PMM0205;                               |
| 198181 - | TSS_010608 | 1000 | 281   | 0 | 0 IP  | within gene(s) PMM0206; 146nt upstream of gene PMM0205;      |
| 198382 - | TSS_010609 | 1000 | 541   | 0 | 0 P   | 33nt upstream of gene PMM0206;                               |
| 199933 - | TSS_010614 | 1000 | 158   | 0 | 3 I   | within gene(s) PMM0207;                                      |
| 201442 + | TSS_001008 | 1000 | 5140  | 0 | 2 P   | 14nt upstream of gene PMM0208;                               |
| 203219 - | TSS_010628 | 1000 | 845   | 0 | 0 I   | within gene(s) PMM0209;                                      |
| 203802 - | TSS_010630 | 1000 | 85    | 0 | 0 I   | within gene(s) PMM0209;                                      |
| 204777 - | TSS_010634 | 1000 | 86    | 0 | 1 P   | 41nt upstream of gene PMM0210;                               |
| 204910 + | TSS_001026 | 1000 | 2073  | 0 | 2 P   | 82nt upstream of gene PMM0211;                               |
| 205032 + | TSS_001030 | 1000 | 94    | 0 | 0 I   | within gene(s) PMM0211;                                      |
| 205343 + | TSS_001039 | 1000 | 66    | 0 | 6 I   | within gene(s) PMM0211;                                      |
| 205563 - | TSS_010639 | 1000 | 186   | 0 | 6 Ai  | antisense to gene(s) PMM0211;                                |
| 205900 - | TSS_010646 | 1000 | 1325  | 0 | 1 Ai  | antisense to gene(s) PMM0211;                                |
| 206424 - | TSS_010649 | 1000 | 912   | 0 | 2 IP  | within gene(s) PMM0213; 172nt upstream of gene PMM0212;      |
| 207728 - | TSS_010664 | 1000 | 217   | 0 | 6 I   | within gene(s) PMM0214;                                      |
| 208529 - | TSS_010696 | 1000 | 78    | 0 | 9 I   | within gene(s) PMM0214;                                      |
| 208811 - | TSS_010711 | 1000 | 116   | 0 | 1 I   | within gene(s) PMM0214;                                      |
| 208944 - | TSS_010720 | 1000 | 10707 | 0 | 4 P   | 28nt upstream of gene PMM0214;                               |
| 209113 + | TSS_001064 | 1000 | 922   | 0 | 1 P   | 31nt upstream of gene PMM0215;                               |
| 210185 + | TSS_001070 | 1000 | 357   | 0 | 1 P   | 16nt upstream of gene PMM0216;                               |
| 211988 - | TSS_010727 | 1000 | 1002  | 0 | 0 Ai  | antisense to gene(s) PMM0217;                                |
| 212046 + | TSS_001076 | 1000 | 72    | 0 | 1 I   | within gene(s) PMM0217;                                      |
| 212115 + | TSS_001078 | 1000 | 84    | 0 | 1 I   | within gene(s) PMM0217;                                      |
| 212245 + | TSS_001079 | 1000 | 64    | 0 | 0 I   | within gene(s) PMM0217;                                      |
| 212936 - | TSS_010728 | 1000 | 113   | 0 | 0 Ai  | antisense to gene(s) PMM0217;                                |
| 213029 + | TSS_001083 | 1000 | 648   | 0 | 6 P   | 33nt upstream of gene PMM0218;                               |
| 214116 + | TSS_001089 | 1000 | 3069  | 0 | 5 P   | 17nt upstream of gene PMM0219;                               |
| 214675 - | TSS_010733 | 1000 | 3234  | 0 | 5 P   | 19nt upstream of gene PMM0220;                               |
| 216078 + | TSS_001096 | 1000 | 128   | 0 | 0 I   | within gene(s) PMM0222;                                      |
| 216861 + | TSS_001102 | 1000 | 16843 | 0 | 17 I  | within gene(s) PMM0223;                                      |
| 216760 + | TSS_001698 | 1000 |       | 0 | 0 P   | 47nt upstream of gene PMM0223;                               |
| 217169 - | TSS_010742 | 1000 | 2501  | 0 | 1 Ai  | antisense to gene(s) PMM0223;                                |
| 217978 + | TSS_001129 | 1000 | 2371  | 0 | 3 P   | 24nt upstream of gene PMM0224;                               |
| 218599 + | TSS_001138 | 1000 | 202   | 0 | 10 I  | within gene(s) PMM0224;                                      |
| 218695 + | TSS_001143 | 1000 | 201   | 0 | 1 I   | within gene(s) PMM0224;                                      |
| 219844 + | TSS_001149 | 1000 | 666   | 0 | 1 Ai  | antisense to gene(s) PMM0226;                                |
| 220009 + | TSS_001153 | 1000 | 611   | 0 | 6 Ai  | antisense to gene(s) PMM0226;                                |
| 220578 - | TSS_010821 | 1000 | 593   | 0 | 18 I  | within gene(s) PMM0226;                                      |
| 221070 - | TSS_010850 | 1000 | 169   | 0 | 2 I   | within gene(s) PMM0226;                                      |
| 221154 - | TSS_010854 | 1000 | 589   | 0 | 3 I   | within gene(s) PMM0226;                                      |
| 221632 - | TSS_010866 | 1000 | 5770  | 0 | 12 P  | 16nt upstream of gene PMM0226;                               |
| 221701 + | TSS_001171 | 1000 | 122   | 0 | 0 Ai  | antisense to gene(s) PMM0227;                                |
| 221978 + | TSS_001174 | 1000 | 458   | 0 | 0 Ai  | antisense to gene(s) PMM0227;                                |
| 222262 - | TSS_010876 | 1000 | 74    | 0 | 0 I   | within gene(s) PMM0227;                                      |
| 223299 - | TSS_010889 | 1000 | 225   | 0 | 28 I  | within gene(s) PMM0228;                                      |
| 223578 - | TSS_010913 | 1000 | 494   | 0 | 7 I   | within gene(s) PMM0228;                                      |
| 223706 - | TSS_010918 | 1000 | 866   | 0 | 0 I   | within gene(s) PMM0228;                                      |
| 223847 - | TSS_010919 | 1000 | 1197  | 0 | 1 P   | 140nt upstream of gene PMM0228;                              |
| 225576 + | TSS_001186 | 1000 | 1117  | 0 | 0 P   | 14nt upstream of gene PMM0231;                               |
| 225783 + | TSS_001189 | 1000 | 220   | 0 | 0 P   | 26nt upstream of gene PMM0232;                               |
| 226315 - | TSS_010924 | 1000 | 121   | 0 | 0 I   | within gene(s) PMM0233;                                      |

|          |            |      |        |   |       |                                                               |
|----------|------------|------|--------|---|-------|---------------------------------------------------------------|
| 227265 - | TSS_010927 | 1000 | 85     | 0 | 0 IP  | within gene(s) PMM0234; 96nt upstream of gene PMM0233;        |
| 227959 + | TSS_001192 | 1000 | 1231   | 0 | 0 P   | 28nt upstream of gene PMM0235;                                |
| 228417 + | TSS_001194 | 1000 | 95     | 0 | 0 O   | -                                                             |
| 228961 + | TSS_001199 | 1000 | 81     | 0 | 2 O   | -                                                             |
| 229314 - | TSS_010935 | 1000 | 128    | 0 | 0 O   | -                                                             |
| 229472 + | TSS_001204 | 1000 | 207    | 0 | 0 P   | 167nt upstream of gene PMM0237;                               |
| 230878 - | TSS_010938 | 1000 | 434    | 0 | 3 Ai  | antisense to gene(s) PMM0238;                                 |
| 232150 + | TSS_001222 | 1000 | 137    | 0 | 0 I   | within gene(s) PMM0238;                                       |
| 232913 - | TSS_010944 | 1000 | 63     | 0 | 0 Ai  | antisense to gene(s) PMM0238;                                 |
| 233913 - | TSS_010946 | 1000 | 106    | 0 | 2 P   | 20nt upstream of gene PMM0239;                                |
| 236862 - | TSS_010951 | 1000 | 63     | 0 | 0 I   | within gene(s) PMM0243;                                       |
| 237372 - | TSS_010954 | 1000 | 80     | 0 | 1 IP  | within gene(s) PMM0244; 48nt upstream of gene PMM0243;        |
| 237523 - | TSS_010958 | 1000 | 1664   | 0 | 3 IP  | within gene(s) PMM0244; 199nt upstream of gene PMM0243;       |
| 237737 - | TSS_010959 | 1000 | 345    | 0 | 0 I   | within gene(s) PMM0244;                                       |
| 238520 - | TSS_010963 | 1000 | 460    | 0 | 1 P   | 20nt upstream of gene PMM0245;                                |
| 238693 + | TSS_001232 | 1000 | 1260   | 0 | 3 P   | 12nt upstream of gene PMM0246;                                |
| 239672 - | TSS_010966 | 1000 | 74     | 0 | 3 Ai  | antisense to gene(s) PMM0247;                                 |
| 241176 - | TSS_010968 | 1000 | 95     | 0 | 0 IP  | within gene(s) PMM0250; 35nt upstream of gene PMM0249;        |
| 242059 + | TSS_001240 | 1000 | 194    | 0 | 0 PAi | 162nt upstream of gene PMM0252; antisense to gene(s) PMM0251; |
| 242165 - | TSS_010971 | 1000 | 530    | 0 | 4 P   | 24nt upstream of gene PMM0251;                                |
| 242185 + | TSS_001242 | 1000 | 1788   | 0 | 2 P   | 36nt upstream of gene PMM0252;                                |
| 242483 + | TSS_001247 | 1000 | 1075   | 0 | 1 P   | 19nt upstream of gene PMM0253;                                |
| 244978 + | TSS_001253 | 1000 | 160    | 0 | 5 Ai  | antisense to gene(s) PMM0255;                                 |
| 245524 - | TSS_010978 | 1000 | 546    | 0 | 10 IP | within gene(s) PMM0256; 219nt upstream of gene PMM0255;       |
| 245888 - | TSS_010986 | 1000 | 79     | 0 | 2 I   | within gene(s) PMM0256;                                       |
| 246248 + | TSS_001257 | 1000 | 4605   | 0 | 1 Ai  | antisense to gene(s) PMM0256;                                 |
| 246731 - | TSS_010992 | 1000 | 2359   | 0 | 5 IP  | within gene(s) PMM0257; 20nt upstream of gene PMM0256;        |
| 248216 - | TSS_010997 | 1000 | 99     | 0 | 0 IP  | within gene(s) PMM0258; 190nt upstream of gene PMM0257;       |
| 249284 - | TSS_011022 | 1000 | 2346   | 0 | 4 P   | 18nt upstream of gene PMM0258;                                |
| 249485 + | TSS_001272 | 1000 | 396    | 0 | 2 P   | 22nt upstream of gene PMM0259;                                |
| 251358 + | TSS_001276 | 1000 | 187    | 0 | 3 Ai  | antisense to gene(s) PMM0261;                                 |
| 252586 + | TSS_002398 | 1000 | 675283 | 0 | 8 P   | 46nt upstream of gene PMM0263;                                |
| 253836 + | TSS_001391 | 1000 | 2712   | 0 | 1 I   | within gene(s) PMM0263;                                       |
| 254003 - | TSS_011074 | 1000 | 7765   | 0 | 8 Ai  | antisense to gene(s) PMM0263;                                 |
| 254183 + | TSS_001403 | 1000 | 591    | 0 | 5 I   | within gene(s) PMM0264;                                       |
| 254564 - | TSS_011083 | 1000 | 126    | 0 | 1 Ai  | antisense to gene(s) PMM0264;                                 |
| 255509 + | TSS_001406 | 1000 | 161    | 0 | 1 I   | within gene(s) PMM0265;                                       |
| 256772 + | TSS_001443 | 1000 | 134    | 0 | 0 Ai  | antisense to gene(s) PMM0266;                                 |
| 258297 + | TSS_001451 | 1000 | 100    | 0 | 1 Ai  | antisense to gene(s) PMM0268;                                 |
| 258478 - | TSS_011103 | 1000 | 304    | 0 | 0 I   | within gene(s) PMM0268;                                       |
| 258539 + | TSS_001454 | 1000 | 363    | 0 | 0 Ai  | antisense to gene(s) PMM0268;                                 |
| 258613 - | TSS_011109 | 1000 | 85     | 0 | 3 P   | 9nt upstream of gene PMM0268;                                 |
| 260372 + | TSS_001460 | 1000 | 72     | 0 | 2 Ai  | antisense to gene(s) PMM0270;                                 |
| 261052 - | TSS_011117 | 1000 | 68     | 0 | 0 Ai  | antisense to gene(s) PMM0271;                                 |
| 261925 + | TSS_001470 | 1000 | 7899   | 0 | 4 P   | 23nt upstream of gene PMM0272;                                |
| 263126 - | TSS_011124 | 1000 | 772    | 0 | 4 P   | 19nt upstream of gene PMM0273;                                |
| 263543 + | TSS_001475 | 1000 | 448    | 0 | 0 Ai  | antisense to gene(s) PMM0274;                                 |
| 264013 + | TSS_001476 | 1000 | 93     | 0 | 0 Ai  | antisense to gene(s) PMM0274;                                 |
| 264561 - | TSS_011131 | 1000 | 229    | 0 | 0 P   | 135nt upstream of gene PMM0274;                               |
| 264640 + | TSS_001478 | 1000 | 253    | 0 | 2 P   | 18nt upstream of gene PMM0275;                                |
| 265763 + | TSS_001487 | 1000 | 167    | 0 | 1 I   | within gene(s) PMM0276;                                       |
| 267539 + | TSS_001490 | 1000 | 95     | 0 | 3 P   | 28nt upstream of gene PMM0278;                                |
| 268849 + | TSS_001492 | 1000 | 84     | 0 | 0 IP  | within gene(s) PMM0278; 175nt upstream of gene PMM0279;       |
| 269162 + | TSS_001495 | 1000 | 345    | 0 | 1 I   | within gene(s) PMM0279;                                       |
| 271937 - | TSS_011165 | 1000 | 474    | 0 | 0 IP  | within gene(s) PMM0282; 173nt upstream of gene PMM0281;       |
| 272570 - | TSS_011176 | 1000 | 105    | 0 | 1 P   | 3nt upstream of gene PMM0282;                                 |
| 273322 + | TSS_001508 | 1000 | 364    | 0 | 3 I   | within gene(s) PMM0284;                                       |
| 274872 - | TSS_011187 | 1000 | 332    | 0 | 0 I   | within gene(s) PMM0285;                                       |
| 274917 - | TSS_011188 | 1000 | 141    | 0 | 0 I   | within gene(s) PMM0285;                                       |
| 277117 + | TSS_001517 | 1000 | 529    | 0 | 0 P   | 54nt upstream of gene PMM0288;                                |
| 280333 - | TSS_011208 | 1000 | 1997   | 0 | 2 IP  | within gene(s) PMM0290; 149nt upstream of gene PMM0289;       |
| 281326 - | TSS_011214 | 1000 | 124    | 0 | 3 Ai  | antisense to gene(s) PMM0291;                                 |
| 282038 - | TSS_011218 | 1000 | 118    | 0 | 4 Ai  | antisense to gene(s) PMM0291;                                 |
| 283519 - | TSS_011230 | 1000 | 337    | 0 | 13 I  | within gene(s) PMM0293;                                       |
| 283811 - | TSS_011244 | 1000 | 4203   | 0 | 0 IP  | within gene(s) PMM0294; 52nt upstream of gene PMM0293;        |
| 283904 - | TSS_011248 | 1000 | 2807   | 0 | 2 IP  | within gene(s) PMM0294; 145nt upstream of gene PMM0293;       |
| 284183 - | TSS_011252 | 1000 | 397    | 0 | 10 P  | 57nt upstream of gene PMM0294;                                |
| 284302 - | TSS_011256 | 1000 | 6652   | 0 | 2 PAi | 176nt upstream of gene PMM0294; antisense to gene(s) PMM0295; |
| 284638 + | TSS_001556 | 1000 | 2702   | 0 | 2 I   | within gene(s) PMM0296;                                       |
| 284851 + | TSS_001562 | 1000 | 442    | 0 | 7 I   | within gene(s) PMM0296;                                       |
| 285370 + | TSS_001581 | 1000 | 155    | 0 | 5 I   | within gene(s) PMM0296;                                       |
| 285545 - | TSS_011267 | 1000 | 176    | 0 | 1 Ai  | antisense to gene(s) PMM0296;                                 |
| 285768 + | TSS_001585 | 1000 | 48936  | 0 | 2 P   | 9nt upstream of gene PMM0297;                                 |
| 286270 + | TSS_001643 | 1000 | 1398   | 0 | 30 IP | within gene(s) PMM0299; 48nt upstream of gene PMM0300;        |
| 286877 + | TSS_001653 | 1000 | 190    | 0 | 1 Ai  | antisense to gene(s) PMM0301;                                 |
| 287552 - | TSS_011282 | 1000 | 959    | 0 | 0 PAi | 83nt upstream of gene PMM0301; antisense to gene(s) PMM0302;  |
| 287702 - | TSS_011284 | 1000 | 576    | 0 | 4 PAi | 233nt upstream of gene PMM0301; antisense to gene(s) PMM0302; |
| 290102 + | TSS_001663 | 1000 | 332    | 0 | 3 Ai  | antisense to gene(s) PMM0303;                                 |
| 290195 + | TSS_001664 | 1000 | 87     | 0 | 0 Ai  | antisense to gene(s) PMM0303;                                 |
| 291235 - | TSS_011289 | 1000 | 111    | 0 | 0 I   | within gene(s) PMM0304;                                       |
| 291317 - | TSS_011290 | 1000 | 170    | 0 | 0 I   | within gene(s) PMM0304;                                       |

|          |            |      |       |   |       |                                                               |
|----------|------------|------|-------|---|-------|---------------------------------------------------------------|
| 291416 - | TSS_011292 | 1000 | 98    | 0 | 2 I   | within gene(s) PMM0304;                                       |
| 293682 + | TSS_001668 | 1000 | 951   | 0 | 3 P   | 28nt upstream of gene PMM0305;                                |
| 294128 - | TSS_011301 | 1000 | 292   | 0 | 1 Ai  | antisense to gene(s) PMM0305;                                 |
| 299042 - | TSS_011346 | 1000 | 6681  | 0 | 2 P   | 18nt upstream of gene PMM0311;                                |
| 299836 - | TSS_011375 | 1000 | 166   | 0 | 0 I   | within gene(s) PMM0312;                                       |
| 299950 - | TSS_011379 | 1000 | 203   | 0 | 3 I   | within gene(s) PMM0312;                                       |
| 300325 - | TSS_011387 | 1000 | 6461  | 0 | 10 P  | 75nt upstream of gene PMM0312;                                |
| 300858 - | TSS_011395 | 1000 | 4734  | 0 | 12 P  | 21nt upstream of gene PMM0313;                                |
| 301297 - | TSS_011414 | 1000 | 659   | 0 | 22 I  | within gene(s) PMM0315;                                       |
| 302182 - | TSS_011494 | 1000 | 3713  | 0 | 30 I  | within gene(s) PMM0315;                                       |
| 302461 - | TSS_011536 | 1000 | 642   | 0 | 0 I   | within gene(s) PMM0315;                                       |
| 302478 - | TSS_011538 | 1000 | 174   | 0 | 3 I   | within gene(s) PMM0315;                                       |
| 303244 - | TSS_011541 | 1000 | 161   | 0 | 6 O   | -                                                             |
| 303256 + | TSS_001736 | 1000 | 4531  | 0 | 18 P  | 24nt upstream of gene PMM0317;                                |
| 305168 - | TSS_011548 | 1000 | 65    | 0 | 0 O   | -                                                             |
| 305442 - | TSS_011552 | 1000 | 230   | 0 | 0 I   | within gene(s) PMM0320;                                       |
| 305727 - | TSS_011557 | 1000 | 650   | 0 | 3 IP  | within gene(s) PMM0321; 174nt upstream of gene PMM0320;       |
| 306386 - | TSS_011563 | 1000 | 1272  | 0 | 2 P   | 15nt upstream of gene PMM0321;                                |
| 308758 + | TSS_001762 | 1000 | 10947 | 0 | 3 Ai  | antisense to gene(s) PMM0324;                                 |
| 309008 + | TSS_001770 | 1000 | 428   | 0 | 0 Ai  | antisense to gene(s) PMM0324;                                 |
| 309678 - | TSS_011589 | 1000 | 168   | 0 | 0 I   | within gene(s) PMM0324;                                       |
| 309757 - | TSS_011590 | 1000 | 319   | 0 | 0 P   | 22nt upstream of gene PMM0324;                                |
| 309786 + | TSS_002869 | 1000 | 28462 | 0 | 3 P   | 20nt upstream of gene PMM0325;                                |
| 309929 - | TSS_011593 | 1000 | 9342  | 0 | 2 PAi | 194nt upstream of gene PMM0324; antisense to gene(s) PMM0325; |
| 310023 + | TSS_001792 | 1000 | 1007  | 0 | 0 I   | within gene(s) PMM0325;                                       |
| 310271 + | TSS_001806 | 1000 | 539   | 0 | 6 IP  | within gene(s) PMM0325; 234nt upstream of gene PMM0326;       |
| 310480 + | TSS_001811 | 1000 | 586   | 0 | 2 P   | 25nt upstream of gene PMM0326;                                |
| 310880 + | TSS_001841 | 1000 | 192   | 0 | 12 I  | within gene(s) PMM0326;                                       |
| 312446 - | TSS_011641 | 1000 | 1935  | 0 | 3 P   | 16nt upstream of gene PMM0327;                                |
| 312554 + | TSS_001856 | 1000 | 4102  | 0 | 0 O   | -                                                             |
| 312728 + | TSS_001864 | 1000 | 0     | 0 | 1 O   | -                                                             |
| 312873 - | TSS_011643 | 1000 | 1112  | 0 | 1 O   | -                                                             |
| 313029 + | TSS_001866 | 1000 | 0     | 0 | 15 O  | -                                                             |
| 313374 - | TSS_011647 | 1000 | 131   | 0 | 1 O   | -                                                             |
| 313530 + | TSS_001906 | 1000 | 0     | 0 | 0 O   | -                                                             |
| 314529 - | TSS_011662 | 1000 | 4028  | 0 | 3 O   | -                                                             |
| 314959 + | TSS_001927 | 1000 | 1712  | 0 | 0 O   | -                                                             |
| 315080 + | TSS_001928 | 1000 | 0     | 0 | 12 O  | -                                                             |
| 315603 + | TSS_002008 | 1000 | 0     | 0 | 5 O   | -                                                             |
| 315856 + | TSS_002023 | 1000 | 0     | 0 | 2 O   | -                                                             |
| 316009 + | TSS_002038 | 1000 | 0     | 0 | 0 O   | -                                                             |
| 316065 - | TSS_011685 | 1000 | 216   | 0 | 5 O   | -                                                             |
| 316220 - | TSS_011688 | 1000 | 511   | 0 | 4 O   | -                                                             |
| 316340 - | TSS_011698 | 1000 | 260   | 0 | 4 O   | -                                                             |
| 318015 + | TSS_002127 | 1000 | 0     | 0 | 0 O   | -                                                             |
| 319130 + | TSS_002134 | 1000 | 1196  | 0 | 2 Ai  | antisense to gene(s) PMM0329;                                 |
| 319267 - | TSS_011744 | 1000 | 282   | 0 | 0 P   | 0nt upstream of gene PMM0329;                                 |
| 320607 + | TSS_002137 | 1000 | 97    | 0 | 0 Ai  | antisense to gene(s) PMM0331;                                 |
| 322362 + | TSS_002140 | 1000 | 185   | 0 | 0 P   | 0nt upstream of gene PMM0333;                                 |
| 323615 - | TSS_011757 | 1000 | 389   | 0 | 5 P   | 16nt upstream of gene PMM0334;                                |
| 324251 - | TSS_011760 | 1000 | 14126 | 0 | 4 O   | -                                                             |
| 324470 - | TSS_011765 | 1000 | 3377  | 0 | 4 O   | -                                                             |
| 324585 + | TSS_002150 | 1000 | 178   | 0 | 6 P   | 17nt upstream of gene PMM0335;                                |
| 324964 + | TSS_002154 | 1000 | 1073  | 0 | 1 I   | within gene(s) PMM0335;                                       |
| 325557 - | TSS_011801 | 1000 | 34119 | 0 | 3 P   | 15nt upstream of gene PMM0336;                                |
| 325983 + | TSS_002164 | 1000 | 199   | 0 | 2 O   | -                                                             |
| 326712 + | TSS_002166 | 1000 | 229   | 0 | 0 O   | -                                                             |
| 327570 - | TSS_011815 | 1000 | 5891  | 0 | 2 O   | -                                                             |
| 327681 + | TSS_002169 | 1000 | 484   | 0 | 1 Ai  | antisense to gene(s) PMM0339;                                 |
| 327887 + | TSS_002171 | 1000 | 97    | 0 | 0 Ai  | antisense to gene(s) PMM0339;                                 |
| 328681 - | TSS_011822 | 1000 | 307   | 0 | 6 I   | within gene(s) PMM0339;                                       |
| 329348 - | TSS_011824 | 1000 | 257   | 0 | 0 P   | 157nt upstream of gene PMM0339;                               |
| 330221 - | TSS_011826 | 1000 | 212   | 0 | 0 P   | 15nt upstream of gene PMM0341;                                |
| 330306 + | TSS_002175 | 1000 | 1611  | 0 | 1 P   | 35nt upstream of gene PMM0342;                                |
| 330978 - | TSS_011829 | 1000 | 446   | 0 | 1 O   | -                                                             |
| 332301 + | TSS_002182 | 1000 | 268   | 0 | 1 P   | 16nt upstream of gene PMM0345;                                |
| 332821 + | TSS_002189 | 1000 | 2477  | 0 | 2 I   | within gene(s) PMM0346;                                       |
| 333569 - | TSS_011839 | 1000 | 239   | 0 | 0 P   | 108nt upstream of gene PMM0347;                               |
| 333733 + | TSS_002192 | 1000 | 143   | 0 | 0 Ai  | antisense to gene(s) PMM0348;                                 |
| 339021 + | TSS_002200 | 1000 | 546   | 0 | 1 P   | 18nt upstream of gene PMM0355;                                |
| 339316 - | TSS_011847 | 1000 | 296   | 0 | 0 Ai  | antisense to gene(s) PMM0355;                                 |
| 339953 + | TSS_003938 | 1000 | 95434 | 0 | 2 O   | -                                                             |
| 340175 - | TSS_011851 | 1000 | 192   | 0 | 0 O   | -                                                             |
| 340326 + | TSS_002204 | 1000 | 438   | 0 | 2 I   | within gene(s) PMM0356;                                       |
| 341457 - | TSS_011856 | 1000 | 135   | 0 | 1 O   | -                                                             |
| 343466 + | TSS_002212 | 1000 | 151   | 0 | 3 O   | -                                                             |
| 345398 + | TSS_002219 | 1000 | 160   | 0 | 3 P   | 22nt upstream of gene PMM0363;                                |
| 346662 + | TSS_002220 | 1000 | 95    | 0 | 0 O   | -                                                             |
| 346829 + | TSS_002222 | 1000 | 176   | 0 | 3 O   | -                                                             |
| 347280 + | TSS_002225 | 1000 | 5099  | 0 | 3 P   | 16nt upstream of gene PMM0364;                                |
| 348066 - | TSS_011864 | 1000 | 1151  | 0 | 1 P   | 21nt upstream of gene PMM0365;                                |

|          |            |      |       |   |      |                                                         |
|----------|------------|------|-------|---|------|---------------------------------------------------------|
| 348206 + | TSS_002232 | 1000 | 563   | 0 | 5 P  | 17nt upstream of gene PMM0366;                          |
| 348397 + | TSS_002235 | 1000 | 341   | 0 | 1 I  | within gene(s) PMM0366;                                 |
| 348935 + | TSS_002238 | 1000 | 359   | 0 | 1 P  | 33nt upstream of gene PMM0367;                          |
| 349333 - | TSS_011870 | 1000 | 219   | 0 | 3 Ai | antisense to gene(s) PMM0367;                           |
| 349634 - | TSS_011872 | 1000 | 165   | 0 | 0 I  | within gene(s) PMM0368;                                 |
| 349709 - | TSS_011873 | 1000 | 682   | 0 | 1 P  | 18nt upstream of gene PMM0368;                          |
| 350069 - | TSS_011876 | 1000 | 1063  | 0 | 1 O  | -                                                       |
| 350388 + | TSS_002240 | 1000 | 243   | 0 | 1 O  | -                                                       |
| 350523 - | TSS_017092 | 1000 | 63541 | 0 | 4 O  | -                                                       |
| 351169 - | TSS_017097 | 1000 | 48923 | 0 | 6 O  | -                                                       |
| 352103 - | TSS_011884 | 1000 | 480   | 0 | 2 O  | -                                                       |
| 352188 + | TSS_002246 | 1000 | 2373  | 0 | 2 P  | 7nt upstream of gene PMM0369;                           |
| 352957 + | TSS_002248 | 1000 | 296   | 0 | 0 P  | 18nt upstream of gene PMM0370;                          |
| 353529 - | TSS_011888 | 1000 | 366   | 0 | 0 Ai | antisense to gene(s) PMM0370;                           |
| 353732 - | TSS_011889 | 1000 | 692   | 0 | 1 Ai | antisense to gene(s) PMM0370;                           |
| 354451 + | TSS_002273 | 1000 | 145   | 0 | 9 IP | within gene(s) PMM0370; 240nt upstream of gene PMM0371; |
| 355412 - | TSS_011898 | 1000 | 331   | 0 | 0 Ai | antisense to gene(s) PMM0371;                           |
| 356060 - | TSS_011899 | 1000 | 209   | 0 | 0 Ai | antisense to gene(s) PMM0372;                           |
| 358183 - | TSS_011906 | 1000 | 1234  | 0 | 2 P  | 16nt upstream of gene PMM0377;                          |
| 358512 - | TSS_011910 | 1000 | 11510 | 0 | 2 P  | 22nt upstream of gene PMM0378;                          |
| 358753 - | TSS_011913 | 1000 | 8779  | 0 | 2 O  | -                                                       |
| 359627 - | TSS_011915 | 1000 | 1013  | 0 | 0 O  | -                                                       |
| 359991 - | TSS_011917 | 1000 | 2314  | 0 | 3 P  | 20nt upstream of gene PMM0379;                          |
| 361663 + | TSS_002289 | 1000 | 391   | 0 | 0 O  | -                                                       |
| 362873 - | TSS_011924 | 1000 | 1352  | 0 | 3 P  | 140nt upstream of gene PMM0383;                         |
| 366442 - | TSS_011935 | 1000 | 128   | 0 | 7 O  | -                                                       |
| 366522 - | TSS_011940 | 1000 | 1689  | 0 | 2 O  | -                                                       |
| 367091 - | TSS_011943 | 1000 | 115   | 0 | 0 I  | within gene(s) PMM0386;                                 |
| 367935 - | TSS_011945 | 1000 | 498   | 0 | 0 O  | -                                                       |
| 368274 + | TSS_002313 | 1000 | 941   | 0 | 2 O  | -                                                       |
| 368514 - | TSS_011949 | 1000 | 328   | 0 | 4 O  | -                                                       |
| 368596 + | TSS_002315 | 1000 | 87    | 0 | 5 P  | 17nt upstream of gene PMM0387;                          |
| 370969 + | TSS_002323 | 1000 | 3064  | 0 | 2 P  | 24nt upstream of gene PMM0391;                          |
| 373282 + | TSS_002330 | 1000 | 81    | 0 | 1 IP | within gene(s) PMM0392; 19nt upstream of gene PMM0393;  |
| 374270 + | TSS_002333 | 1000 | 825   | 0 | 0 P  | 97nt upstream of gene PMM0395;                          |
| 376105 + | TSS_002366 | 1000 | 125   | 0 | 1 Ai | antisense to gene(s) PMM0397;                           |
| 376934 - | TSS_011976 | 1000 | 84    | 0 | 0 P  | 15nt upstream of gene PMM0397;                          |
| 377675 - | TSS_011978 | 1000 | 184   | 0 | 1 I  | within gene(s) PMM0398;                                 |
| 379061 - | TSS_011982 | 1000 | 140   | 0 | 2 P  | 24nt upstream of gene PMM0400;                          |
| 380710 - | TSS_011986 | 1000 | 122   | 0 | 0 Ai | antisense to gene(s) PMM0402;                           |
| 381726 + | TSS_002375 | 1000 | 3754  | 0 | 2 P  | 14nt upstream of gene PMM0403;                          |
| 383585 + | TSS_002386 | 1000 | 10865 | 0 | 4 P  | 85nt upstream of gene PMM0405;                          |
| 384035 - | TSS_011991 | 1000 | 399   | 0 | 1 Ai | antisense to gene(s) PMM0405;                           |
| 384162 + | TSS_002423 | 1000 | 139   | 0 | 3 I  | within gene(s) PMM0405;                                 |
| 384519 + | TSS_002440 | 1000 | 436   | 0 | 3 I  | within gene(s) PMM0405;                                 |
| 384720 + | TSS_002453 | 1000 | 370   | 0 | 0 I  | within gene(s) PMM0405;                                 |
| 385716 + | TSS_002462 | 1000 | 484   | 0 | 0 I  | within gene(s) PMM0406;                                 |
| 386603 + | TSS_002473 | 1000 | 1902  | 0 | 1 Ai | antisense to gene(s) PMM0407;                           |
| 387042 - | TSS_012107 | 1000 | 862   | 0 | 15 I | within gene(s) PMM0407;                                 |
| 387181 - | TSS_012119 | 1000 | 424   | 0 | 3 P  | 24nt upstream of gene PMM0407;                          |
| 390631 + | TSS_002497 | 1000 | 179   | 0 | 3 P  | 26nt upstream of gene PMM0411;                          |
| 392813 + | TSS_002502 | 1000 | 403   | 0 | 2 P  | 15nt upstream of gene PMM0414;                          |
| 395057 + | TSS_002504 | 1000 | 143   | 0 | 0 Ai | antisense to gene(s) PMM0416;                           |
| 395539 - | TSS_012147 | 1000 | 1626  | 0 | 3 P  | 16nt upstream of gene PMM0416;                          |
| 395864 - | TSS_017469 | 1000 | 20465 | 0 | 5 O  | -                                                       |
| 396587 + | TSS_002510 | 1000 | 72    | 0 | 0 P  | 42nt upstream of gene PMM0419;                          |
| 398147 + | TSS_002515 | 1000 | 1393  | 0 | 2 P  | 32nt upstream of gene PMM0420;                          |
| 398719 + | TSS_002519 | 1000 | 246   | 0 | 3 I  | within gene(s) PMM0420;                                 |
| 401612 - | TSS_012156 | 1000 | 645   | 0 | 0 P  | 18nt upstream of gene PMM0422;                          |
| 401747 + | TSS_002529 | 1000 | 7194  | 0 | 3 O  | -                                                       |
| 401864 - | TSS_012160 | 1000 | 125   | 0 | 1 O  | -                                                       |
| 402007 - | TSS_012161 | 1000 | 187   | 0 | 0 O  | -                                                       |
| 404138 + | TSS_002533 | 1000 | 141   | 0 | 0 I  | within gene(s) PMM0425;                                 |
| 405550 + | TSS_002534 | 1000 | 158   | 0 | 0 I  | within gene(s) PMM0426;                                 |
| 408258 - | TSS_012169 | 1000 | 138   | 0 | 1 IP | within gene(s) PMM0428; 237nt upstream of gene PMM0427; |
| 409230 - | TSS_012179 | 1000 | 420   | 0 | 3 P  | 20nt upstream of gene PMM0429;                          |
| 409244 + | TSS_002543 | 1000 | 111   | 0 | 0 P  | 26nt upstream of gene PMM0430;                          |
| 409562 - | TSS_012181 | 1000 | 285   | 0 | 0 Ai | antisense to gene(s) PMM0430;                           |
| 412935 + | TSS_002549 | 1000 | 210   | 0 | 2 Ai | antisense to gene(s) PMM0435;                           |
| 413484 + | TSS_002552 | 1000 | 428   | 0 | 3 Ai | antisense to gene(s) PMM0435;                           |
| 414359 - | TSS_012204 | 1000 | 1149  | 0 | 2 P  | 44nt upstream of gene PMM0435;                          |
| 414382 + | TSS_002557 | 1000 | 683   | 0 | 2 P  | 102nt upstream of gene PMM0436;                         |
| 417856 + | TSS_002587 | 1000 | 162   | 0 | 0 I  | within gene(s) PMM0438;                                 |
| 419521 - | TSS_012215 | 1000 | 456   | 0 | 1 Ai | antisense to gene(s) PMM0440;                           |
| 422795 - | TSS_012227 | 1000 | 734   | 0 | 6 P  | 16nt upstream of gene PMM0443;                          |
| 424880 - | TSS_012273 | 1000 | 606   | 0 | 6 I  | within gene(s) PMM0445;                                 |
| 425395 - | TSS_012287 | 1000 | 261   | 0 | 0 I  | within gene(s) PMM0446;                                 |
| 426162 + | TSS_002616 | 1000 | 346   | 0 | 1 P  | 8nt upstream of gene PMM0447;                           |
| 427279 + | TSS_002626 | 1000 | 124   | 0 | 2 I  | within gene(s) PMM0448;                                 |
| 427561 + | TSS_002632 | 1000 | 123   | 0 | 3 I  | within gene(s) PMM0448;                                 |
| 430126 + | TSS_002652 | 1000 | 298   | 0 | 5 I  | within gene(s) PMM0451;                                 |

|          |            |      |       |   |       |                                                               |
|----------|------------|------|-------|---|-------|---------------------------------------------------------------|
| 431182 - | TSS_012320 | 1000 | 189   | 0 | 9 I   | within gene(s) PMM0452;                                       |
| 432210 - | TSS_012388 | 1000 | 345   | 0 | 0 I   | within gene(s) PMM0452;                                       |
| 432317 - | TSS_012391 | 1000 | 3818  | 0 | 3 P   | 16nt upstream of gene PMM0452;                                |
| 432436 + | TSS_002676 | 1000 | 193   | 0 | 0 O   | -                                                             |
| 433380 - | TSS_012398 | 1000 | 277   | 0 | 5 P   | 16nt upstream of gene PMM0453;                                |
| 433437 + | TSS_002678 | 1000 | 681   | 0 | 0 P   | 21nt upstream of gene PMM0454;                                |
| 433825 - | TSS_012402 | 1000 | 270   | 0 | 0 Ai  | antisense to gene(s) PMM0454;                                 |
| 433897 + | TSS_002683 | 1000 | 195   | 0 | 2 I   | within gene(s) PMM0454;                                       |
| 435917 - | TSS_012408 | 1000 | 365   | 0 | 0 P   | 19nt upstream of gene PMM0456;                                |
| 437733 + | TSS_002696 | 1000 | 161   | 0 | 0 Ai  | antisense to gene(s) PMM0458;                                 |
| 440050 - | TSS_012418 | 1000 | 127   | 0 | 9 IP  | within gene(s) PMM0461; 245nt upstream of gene PMM0460;       |
| 440245 - | TSS_012428 | 1000 | 148   | 0 | 21 I  | within gene(s) PMM0461;                                       |
| 440885 - | TSS_012474 | 1000 | 209   | 0 | 9 IP  | within gene(s) PMM0462; 115nt upstream of gene PMM0461;       |
| 441185 - | TSS_012492 | 1000 | 197   | 0 | 2 I   | within gene(s) PMM0462;                                       |
| 441340 - | TSS_012497 | 1000 | 1346  | 0 | 3 P   | 29nt upstream of gene PMM0462;                                |
| 442840 - | TSS_012506 | 1000 | 3010  | 0 | 5 P   | 17nt upstream of gene PMM0465;                                |
| 444471 + | TSS_002717 | 1000 | 147   | 0 | 0 PAi | 157nt upstream of gene PMM0467; antisense to gene(s) PMM0466; |
| 444597 - | TSS_012512 | 1000 | 148   | 0 | 1 P   | 44nt upstream of gene PMM0466;                                |
| 445213 + | TSS_002721 | 1000 | 329   | 0 | 1 Ai  | antisense to gene(s) PMM0468;                                 |
| 445961 - | TSS_012568 | 1000 | 42134 | 0 | 4 P   | 42nt upstream of gene PMM0469;                                |
| 445980 + | TSS_002728 | 1000 | 326   | 0 | 1 P   | 14nt upstream of gene PMM0470;                                |
| 446903 + | TSS_002738 | 1000 | 282   | 0 | 0 IP  | within gene(s) PMM0470; 167nt upstream of gene PMM0471;       |
| 447162 - | TSS_012578 | 1000 | 84    | 0 | 1 Ai  | antisense to gene(s) PMM0471;                                 |
| 447381 + | TSS_002740 | 1000 | 1595  | 0 | 4 P   | 29nt upstream of gene PMM0472;                                |
| 447456 + | TSS_002741 | 1000 | 109   | 0 | 0 I   | within gene(s) PMM0472;                                       |
| 450442 + | TSS_002748 | 1000 | 118   | 0 | 1 Ai  | antisense to gene(s) PMM0474;                                 |
| 450629 - | TSS_012595 | 1000 | 2108  | 0 | 1 P   | 148nt upstream of gene PMM0474;                               |
| 450716 - | TSS_017932 | 1000 | 8153  | 0 | 3 IP  | within gene(s) PMM0475; 235nt upstream of gene PMM0474;       |
| 450872 + | TSS_002751 | 1000 | 241   | 0 | 2 Ai  | antisense to gene(s) PMM0475;                                 |
| 450998 + | TSS_002752 | 1000 | 431   | 0 | 2 Ai  | antisense to gene(s) PMM0475;                                 |
| 451134 - | TSS_017945 | 1000 | 7945  | 0 | 8 P   | 4nt upstream of gene PMM0475;                                 |
| 451442 + | TSS_002758 | 1000 | 466   | 0 | 4 PAi | 101nt upstream of gene PMM0477; antisense to gene(s) PMM0476; |
| 451913 + | TSS_002787 | 1000 | 1357  | 0 | 1 I   | within gene(s) PMM0477;                                       |
| 452132 + | TSS_002801 | 1000 | 10970 | 0 | 2 I   | within gene(s) PMM0477;                                       |
| 453136 - | TSS_012625 | 1000 | 219   | 0 | 6 P   | 44nt upstream of gene PMM0478;                                |
| 453247 + | TSS_002806 | 1000 | 973   | 0 | 2 P   | 22nt upstream of gene PMM0479;                                |
| 453732 - | TSS_012630 | 1000 | 280   | 0 | 0 Ai  | antisense to gene(s) PMM0479;                                 |
| 454387 + | TSS_002819 | 1000 | 959   | 0 | 3 P   | 17nt upstream of gene PMM0480;                                |
| 454968 + | TSS_002822 | 1000 | 184   | 0 | 4 P   | 16nt upstream of gene PMM0481;                                |
| 455492 + | TSS_002823 | 1000 | 188   | 0 | 0 O   | -                                                             |
| 455674 - | TSS_012639 | 1000 | 138   | 0 | 6 O   | -                                                             |
| 456144 - | TSS_012645 | 1000 | 259   | 0 | 2 Ai  | antisense to gene(s) PMM0482;                                 |
| 456226 + | TSS_002836 | 1000 | 161   | 0 | 18 I  | within gene(s) PMM0482;                                       |
| 456319 + | TSS_002848 | 1000 | 203   | 0 | 12 I  | within gene(s) PMM0482;                                       |
| 456568 + | TSS_002853 | 1000 | 265   | 0 | 1 I   | within gene(s) PMM0482;                                       |
| 456940 + | TSS_002855 | 1000 | 330   | 0 | 3 Ai  | antisense to gene(s) PMM0483;                                 |
| 457405 + | TSS_002861 | 1000 | 730   | 0 | 2 Ai  | antisense to gene(s) PMM0483;                                 |
| 457551 + | TSS_002863 | 1000 | 155   | 0 | 1 Ai  | antisense to gene(s) PMM0483;                                 |
| 457755 - | TSS_012661 | 1000 | 112   | 0 | 2 I   | within gene(s) PMM0483;                                       |
| 457975 - | TSS_012667 | 1000 | 2080  | 0 | 5 P   | 36nt upstream of gene PMM0483;                                |
| 459029 - | TSS_012678 | 1000 | 399   | 0 | 0 P   | 17nt upstream of gene PMM0484;                                |
| 459043 + | TSS_002866 | 1000 | 155   | 0 | 0 P   | 42nt upstream of gene PMM0485;                                |
| 460033 + | TSS_002869 | 1000 | 103   | 0 | 3 P   | 60nt upstream of gene PMM0487;                                |
| 465379 - | TSS_012690 | 1000 | 112   | 0 | 0 IP  | within gene(s) PMM0492; 125nt upstream of gene PMM0491;       |
| 465840 + | TSS_002882 | 1000 | 663   | 0 | 3 P   | 16nt upstream of gene PMM0493;                                |
| 466192 + | TSS_002884 | 1000 | 1020  | 0 | 2 I   | within gene(s) PMM0493;                                       |
| 466610 + | TSS_002887 | 1000 | 157   | 0 | 0 I   | within gene(s) PMM0493;                                       |
| 467409 + | TSS_002890 | 1000 | 172   | 0 | 1 P   | 15nt upstream of gene PMM0494;                                |
| 467553 + | TSS_002893 | 1000 | 517   | 0 | 2 I   | within gene(s) PMM0494;                                       |
| 467736 + | TSS_002903 | 1000 | 162   | 0 | 3 I   | within gene(s) PMM0494;                                       |
| 468497 - | TSS_012700 | 1000 | 779   | 0 | 2 I   | within gene(s) PMM0495;                                       |
| 469000 - | TSS_012706 | 1000 | 421   | 0 | 0 P   | 32nt upstream of gene PMM0495;                                |
| 470267 - | TSS_012736 | 1000 | 2387  | 0 | 2 P   | 14nt upstream of gene PMM0496;                                |
| 474859 - | TSS_012746 | 1000 | 557   | 0 | 0 IP  | within gene(s) PMM0500; 37nt upstream of gene PMM0499;        |
| 475324 - | TSS_012748 | 1000 | 438   | 0 | 4 I   | within gene(s) PMM0500;                                       |
| 475534 - | TSS_012752 | 1000 | 269   | 0 | 0 PAi | 170nt upstream of gene PMM0500; antisense to gene(s) PMM0501; |
| 475685 + | TSS_002923 | 1000 | 962   | 0 | 10 Ai | antisense to gene(s) PMM0502;                                 |
| 475749 + | TSS_002929 | 1000 | 2416  | 0 | 4 Ai  | antisense to gene(s) PMM0502;                                 |
| 476045 - | TSS_012758 | 1000 | 632   | 0 | 0 P   | 16nt upstream of gene PMM0502;                                |
| 476529 + | TSS_002933 | 1000 | 128   | 0 | 0 I   | within gene(s) PMM0503;                                       |
| 477868 + | TSS_002935 | 1000 | 111   | 0 | 4 Ai  | antisense to gene(s) PMM0505;                                 |
| 479542 - | TSS_012772 | 1000 | 602   | 0 | 2 P   | 26nt upstream of gene PMM0506;                                |
| 479651 - | TSS_012773 | 1000 | 152   | 0 | 0 IP  | within gene(s) PMM0507; 135nt upstream of gene PMM0506;       |
| 480066 - | TSS_012777 | 1000 | 257   | 0 | 3 IP  | within gene(s) PMM0508; 31nt upstream of gene PMM0507;        |
| 481882 - | TSS_012791 | 1000 | 609   | 0 | 1 P   | 18nt upstream of gene PMM0508;                                |
| 482442 + | TSS_002949 | 1000 | 2447  | 0 | 2 P   | 36nt upstream of gene PMM0510;                                |
| 483044 - | TSS_012794 | 1000 | 112   | 0 | 2 Ai  | antisense to gene(s) PMM0511;                                 |
| 483869 + | TSS_002954 | 1000 | 397   | 0 | 3 I   | within gene(s) PMM0513;                                       |
| 486912 - | TSS_012803 | 1000 | 901   | 0 | 5 P   | 21nt upstream of gene PMM0515;                                |
| 487573 + | TSS_002964 | 1000 | 112   | 0 | 0 I   | within gene(s) PMM0516;                                       |
| 490430 + | TSS_002967 | 1000 | 180   | 0 | 2 I   | within gene(s) PMM0518;                                       |



|          |            |      |       |   |       |                                                         |
|----------|------------|------|-------|---|-------|---------------------------------------------------------|
| 490706 + | TSS_005262 | 1000 | 3641  | 0 | 0 P   | 20nt upstream of gene PMM0519;                          |
| 491974 - | TSS_012815 | 1000 | 183   | 0 | 0 I   | within gene(s) PMM0520;                                 |
| 493398 - | TSS_012821 | 1000 | 246   | 0 | 3 I   | within gene(s) PMM0521;                                 |
| 493513 - | TSS_012824 | 1000 | 330   | 0 | 0 IP  | within gene(s) PMM0522; 82nt upstream of gene PMM0521;  |
| 493630 + | TSS_003004 | 1000 | 312   | 0 | 3 Ai  | antisense to gene(s) PMM0522;                           |
| 493755 + | TSS_003006 | 1000 | 140   | 0 | 0 Ai  | antisense to gene(s) PMM0522;                           |
| 493996 - | TSS_012831 | 1000 | 162   | 0 | 3 I   | within gene(s) PMM0522;                                 |
| 494177 - | TSS_018185 | 1000 | 874   | 0 | 0 P   | 13nt upstream of gene PMM0522;                          |
| 494529 + | TSS_003010 | 1000 | 264   | 0 | 0 Ai  | antisense to gene(s) PMM0523;                           |
| 495001 - | TSS_012835 | 1000 | 664   | 0 | 8 P   | 12nt upstream of gene PMM0523;                          |
| 496211 + | TSS_003015 | 1000 | 1955  | 0 | 3 P   | 44nt upstream of gene PMM0525;                          |
| 497254 + | TSS_003020 | 1000 | 235   | 0 | 6 I   | within gene(s) PMM0525;                                 |
| 497550 + | TSS_003023 | 1000 | 3501  | 0 | 2 P   | 15nt upstream of gene PMM0526;                          |
| 498247 + | TSS_003041 | 1000 | 101   | 0 | 6 I   | within gene(s) PMM0526;                                 |
| 498643 + | TSS_003048 | 1000 | 305   | 0 | 0 I   | within gene(s) PMM0526;                                 |
| 498964 - | TSS_012850 | 1000 | 189   | 0 | 2 Ai  | antisense to gene(s) PMM0526;                           |
| 499089 + | TSS_003081 | 1000 | 183   | 0 | 30 I  | within gene(s) PMM0526;                                 |
| 502682 - | TSS_012876 | 1000 | 1321  | 0 | 3 P   | 24nt upstream of gene PMM0530;                          |
| 503609 + | TSS_003095 | 1000 | 177   | 0 | 3 P   | 22nt upstream of gene PMM0532;                          |
| 503597 + | TSS_005527 | 1000 | 2652  | 0 | 1 P   | 34nt upstream of gene PMM0532;                          |
| 504428 + | TSS_003118 | 1000 | 339   | 0 | 5 P   | 29nt upstream of gene PMM0533;                          |
| 504905 + | TSS_003122 | 1000 | 86    | 0 | 4 I   | within gene(s) PMM0533;                                 |
| 505257 - | TSS_012884 | 1000 | 167   | 0 | 0 Ai  | antisense to gene(s) PMM0533;                           |
| 505261 + | TSS_003125 | 1000 | 504   | 0 | 10 IP | within gene(s) PMM0533; 240nt upstream of gene PMM0534; |
| 505757 + | TSS_003131 | 1000 | 110   | 0 | 0 I   | within gene(s) PMM0534;                                 |
| 506152 + | TSS_003135 | 1000 | 244   | 0 | 0 I   | within gene(s) PMM0534;                                 |
| 507310 + | TSS_003138 | 1000 | 694   | 0 | 1 P   | 62nt upstream of gene PMM0536;                          |
| 508770 - | TSS_012890 | 1000 | 186   | 0 | 0 I   | within gene(s) PMM0537;                                 |
| 510847 + | TSS_003160 | 1000 | 824   | 0 | 2 P   | 19nt upstream of gene PMM0540;                          |
| 511407 + | TSS_003164 | 1000 | 182   | 0 | 0 P   | 58nt upstream of gene PMM0542;                          |
| 512853 + | TSS_003171 | 1000 | 3986  | 0 | 2 Ai  | antisense to gene(s) PMM0543;                           |
| 513385 - | TSS_012942 | 1000 | 8922  | 0 | 5 P   | 24nt upstream of gene PMM0543;                          |
| 513547 + | TSS_003178 | 1000 | 138   | 0 | 0 Ad  | antisense to gene(s) PMM0544 (7nt downstream);          |
| 514356 - | TSS_013001 | 1000 | 774   | 0 | 12 I  | within gene(s) PMM0544;                                 |
| 515091 - | TSS_013055 | 1000 | 668   | 0 | 16 I  | within gene(s) PMM0544;                                 |
| 515379 - | TSS_013097 | 1000 | 428   | 0 | 34 IP | within gene(s) PMM0545; 246nt upstream of gene PMM0544; |
| 516192 - | TSS_013197 | 1000 | 1600  | 0 | 5 I   | within gene(s) PMM0545;                                 |
| 516933 - | TSS_018536 | 1000 |       | 0 | 13 P  | 15nt upstream of gene PMM0546;                          |
| 518401 - | TSS_013222 | 1000 | 240   | 0 | 6 P   | 18nt upstream of gene PMM0548;                          |
| 518681 + | TSS_005665 | 1000 | 90415 | 0 | 2 P   | 44nt upstream of gene PMM0549;                          |
| 519993 + | TSS_003307 | 1000 | 1684  | 0 | 3 I   | within gene(s) PMM0550;                                 |
| 520175 - | TSS_013242 | 1000 | 197   | 0 | 0 Ai  | antisense to gene(s) PMM0550;                           |
| 520224 + | TSS_003313 | 1000 | 774   | 0 | 1 I   | within gene(s) PMM0550;                                 |
| 520384 - | TSS_013247 | 1000 | 626   | 0 | 0 Ai  | antisense to gene(s) PMM0550;                           |
| 521962 - | TSS_013260 | 1000 | 138   | 0 | 4 Ai  | antisense to gene(s) PMM0552;                           |
| 522659 + | TSS_003383 | 1000 | 235   | 0 | 6 I   | within gene(s) PMM0552;                                 |
| 523106 - | TSS_013277 | 1000 | 249   | 0 | 11 Ai | antisense to gene(s) PMM0552;                           |
| 524269 - | TSS_013293 | 1000 | 136   | 0 | 0 Ai  | antisense to gene(s) PMM0553;                           |
| 524632 - | TSS_013297 | 1000 | 3384  | 0 | 2 Ai  | antisense to gene(s) PMM0553;                           |
| 524738 + | TSS_003406 | 1000 | 279   | 0 | 0 IP  | within gene(s) PMM0553; 124nt upstream of gene PMM0554; |
| 524791 + | TSS_003407 | 1000 | 1399  | 0 | 0 IP  | within gene(s) PMM0553; 71nt upstream of gene PMM0554;  |
| 525973 - | TSS_013307 | 1000 | 6781  | 0 | 4 P   | 18nt upstream of gene PMM0557;                          |
| 526448 - | TSS_013314 | 1000 | 1398  | 0 | 2 P   | 15nt upstream of gene PMM0558;                          |
| 527220 + | TSS_003425 | 1000 | 2993  | 0 | 1 P   | 22nt upstream of gene PMM0560;                          |
| 528660 + | TSS_003433 | 1000 | 119   | 0 | 2 I   | within gene(s) PMM0561;                                 |
| 529035 + | TSS_003439 | 1000 | 307   | 0 | 4 I   | within gene(s) PMM0561;                                 |
| 529358 + | TSS_003440 | 1000 | 123   | 0 | 4 I   | within gene(s) PMM0561;                                 |
| 531559 - | TSS_013327 | 1000 | 130   | 0 | 0 P   | 40nt upstream of gene PMM0564;                          |
| 531701 + | TSS_003456 | 1000 | 220   | 0 | 4 P   | 15nt upstream of gene PMM0565;                          |
| 532356 - | TSS_013330 | 1000 | 273   | 0 | 2 Ai  | antisense to gene(s) PMM0565;                           |
| 534371 + | TSS_003463 | 1000 | 223   | 0 | 7 P   | 6nt upstream of gene PMM0567;                           |
| 538166 + | TSS_003475 | 1000 | 615   | 0 | 2 P   | 179nt upstream of gene PMM0570;                         |
| 539865 + | TSS_003481 | 1000 | 360   | 0 | 0 Ad  | antisense to gene(s) PMM0573 (15nt downstream);         |
| 539992 + | TSS_003483 | 1000 | 773   | 0 | 0 Ai  | antisense to gene(s) PMM0573;                           |
| 540221 - | TSS_013363 | 1000 |       | 0 | 12 P  | 97nt upstream of gene PMM0573;                          |
| 540317 - | TSS_013367 | 1000 | 293   | 0 | 0 P   | 163nt upstream of gene PMM0573;                         |
| 542147 - | TSS_013396 | 1000 | 2606  | 0 | 5 I   | within gene(s) PMM0577;                                 |
| 543284 - | TSS_013410 | 1000 | 676   | 0 | 4 P   | 38nt upstream of gene PMM0578;                          |
| 545216 + | TSS_005808 | 1000 | 4515  | 0 | 1 Ai  | antisense to gene(s) PMM0580;                           |
| 546045 - | TSS_013420 | 1000 | 2117  | 0 | 1 I   | within gene(s) PMM0580;                                 |
| 546530 + | TSS_003515 | 1000 | 1038  | 0 | 2 Ai  | antisense to gene(s) PMM0581;                           |
| 546844 - | TSS_013445 | 1000 |       | 0 | 5 I   | 17nt upstream of gene PMM0581;                          |
| 548961 - | TSS_013477 | 1000 | 4613  | 0 | 4 P   | 43nt upstream of gene PMM0583;                          |
| 550115 + | TSS_003526 | 1000 | 163   | 0 | 0 Ai  | antisense to gene(s) PMM0584;                           |
| 551319 - | TSS_013495 | 1000 | 461   | 0 | 2 P   | 13nt upstream of gene PMM0584;                          |
| 558189 + | TSS_003536 | 1000 | 102   | 0 | 1 P   | 13nt upstream of gene PMM0590;                          |
| 558490 + | TSS_003542 | 1000 | 93    | 0 | 3 I   | within gene(s) PMM0590;                                 |
| 561219 - | TSS_013519 | 1000 | 198   | 0 | 6 I   | within gene(s) PMM0593;                                 |
| 562701 + | TSS_003548 | 1000 | 390   | 0 | 0 Ai  | antisense to gene(s) PMM0594;                           |
| 563864 - | TSS_013550 | 1000 | 189   | 0 | 2 I   | within gene(s) PMM0594;                                 |
| 564355 + | TSS_003560 | 1000 | 217   | 0 | 1 Ai  | antisense to gene(s) PMM0595;                           |

|          |            |      |       |   |    |    |                                                         |
|----------|------------|------|-------|---|----|----|---------------------------------------------------------|
| 565234 - | TSS_013565 | 1000 | 193   | 0 | 4  | IP | within gene(s) PMM0596; 90nt upstream of gene PMM0595;  |
| 565420 - | TSS_013568 | 1000 | 992   | 0 | 1  | I  | within gene(s) PMM0596;                                 |
| 567864 + | TSS_003576 | 1000 | 150   | 0 | 5  | Ai | antisense to gene(s) PMM0597;                           |
| 569600 - | TSS_013585 | 1000 | 1176  | 0 | 8  | P  | 20nt upstream of gene PMM0599;                          |
| 569733 + | TSS_003585 | 1000 | 132   | 0 | 3  | P  | 18nt upstream of gene PMM0600;                          |
| 571704 + | TSS_003598 | 1000 | 119   | 0 | 2  | I  | within gene(s) PMM0601;                                 |
| 572225 + | TSS_003601 | 1000 | 99    | 0 | 4  | I  | within gene(s) PMM0602;                                 |
| 572734 + | TSS_003607 | 1000 | 131   | 0 | 0  | IP | within gene(s) PMM0602; 61nt upstream of gene PMM0603;  |
| 573526 - | TSS_013605 | 1000 | 623   | 0 | 2  | Ai | antisense to gene(s) PMM0603;                           |
| 573992 + | TSS_003616 | 1000 | 126   | 0 | 0  | I  | within gene(s) PMM0604;                                 |
| 574977 + | TSS_003619 | 1000 | 163   | 0 | 1  | Ai | antisense to gene(s) PMM0605;                           |
| 575199 - | TSS_013612 | 1000 | 2955  | 0 | 1  | P  | 16nt upstream of gene PMM0605;                          |
| 577744 + | TSS_003626 | 1000 | 210   | 0 | 0  | I  | within gene(s) PMM0608;                                 |
| 578017 - | TSS_013621 | 1000 | 263   | 0 | 0  | Ai | antisense to gene(s) PMM0608;                           |
| 578318 + | TSS_003633 | 1000 | 1204  | 0 | 3  | IP | within gene(s) PMM0608; 247nt upstream of gene PMM0609; |
| 578964 - | TSS_013627 | 1000 | 176   | 0 | 0  | Ai | antisense to gene(s) PMM0609;                           |
| 579495 + | TSS_003641 | 1000 | 378   | 0 | 0  | I  | within gene(s) PMM0609;                                 |
| 582602 - | TSS_013632 | 1000 | 426   | 0 | 3  | I  | within gene(s) PMM0611;                                 |
| 582767 - | TSS_013635 | 1000 | 156   | 0 | 5  | P  | 17nt upstream of gene PMM0611;                          |
| 584058 - | TSS_013639 | 1000 | 252   | 0 | 2  | I  | within gene(s) PMM0613;                                 |
| 585123 + | TSS_003656 | 1000 | 2318  | 0 | 6  | P  | 120nt upstream of gene PMM0614;                         |
| 585737 + | TSS_003660 | 1000 | 876   | 0 | 1  | IP | within gene(s) PMM0614; 160nt upstream of gene PMM0615; |
| 586359 + | TSS_003669 | 1000 | 150   | 0 | 3  | I  | within gene(s) PMM0615;                                 |
| 587070 - | TSS_013647 | 1000 | 349   | 0 | 0  | Ai | antisense to gene(s) PMM0616;                           |
| 588622 + | TSS_003678 | 1000 | 1012  | 0 | 3  | P  | 9nt upstream of gene PMM0618;                           |
| 588874 + | TSS_003680 | 1000 | 204   | 0 | 1  | I  | within gene(s) PMM0618;                                 |
| 589671 + | TSS_003684 | 1000 | 188   | 0 | 0  | P  | 29nt upstream of gene PMM0619;                          |
| 590072 + | TSS_003690 | 1000 | 178   | 0 | 9  | I  | within gene(s) PMM0619;                                 |
| 590670 - | TSS_013656 | 1000 | 1307  | 0 | 3  | Ai | antisense to gene(s) PMM0619;                           |
| 593663 - | TSS_013670 | 1000 | 175   | 0 | 0  | I  | within gene(s) PMM0622;                                 |
| 594680 + | TSS_003754 | 1000 | 198   | 0 | 2  | I  | within gene(s) PMM0623;                                 |
| 595886 + | TSS_003756 | 1000 | 224   | 0 | 1  | P  | 18nt upstream of gene PMM0626;                          |
| 596067 - | TSS_013674 | 1000 | 170   | 0 | 0  | Ai | antisense to gene(s) PMM0626;                           |
| 596385 - | TSS_013676 | 1000 | 1525  | 0 | 1  | O  | -                                                       |
| 600230 + | TSS_003768 | 1000 | 472   | 0 | 0  | P  | 26nt upstream of gene PMM0631;                          |
| 601604 - | TSS_013696 | 1000 | 133   | 0 | 0  | IP | within gene(s) PMM0633; 102nt upstream of gene PMM0632; |
| 602377 - | TSS_013698 | 1000 | 256   | 0 | 0  | I  | within gene(s) PMM0633;                                 |
| 602756 - | TSS_013699 | 1000 | 114   | 0 | 2  | I  | within gene(s) PMM0633;                                 |
| 605794 + | TSS_003774 | 1000 | 302   | 0 | 4  | P  | 19nt upstream of gene PMM0637;                          |
| 608933 - | TSS_013719 | 1000 | 123   | 0 | 0  | Ai | antisense to gene(s) PMM0640;                           |
| 609209 - | TSS_013720 | 1000 | 573   | 0 | 0  | Ai | antisense to gene(s) PMM0640;                           |
| 609497 + | TSS_003785 | 1000 | 142   | 0 | 0  | I  | within gene(s) PMM0640;                                 |
| 610210 + | TSS_003794 | 1000 | 5405  | 0 | 6  | P  | 16nt upstream of gene PMM0641;                          |
| 610941 + | TSS_003799 | 1000 | 9852  | 0 | 3  | P  | 17nt upstream of gene PMM0642;                          |
| 611411 + | TSS_003813 | 1000 | 530   | 0 | 18 | I  | within gene(s) PMM0642;                                 |
| 614001 - | TSS_013743 | 1000 | 91    | 0 | 1  | I  | within gene(s) PMM0644;                                 |
| 614082 - | TSS_013745 | 1000 | 234   | 0 | 1  | I  | within gene(s) PMM0644;                                 |
| 614781 - | TSS_013754 | 1000 | 556   | 0 | 2  | P  | 15nt upstream of gene PMM0644;                          |
| 617157 - | TSS_013761 | 1000 | 7728  | 0 | 7  | Ai | antisense to gene(s) PMM0646;                           |
| 618720 + | TSS_003887 | 1000 | 315   | 0 | 6  | Ai | antisense to gene(s) PMM0648;                           |
| 619528 - | TSS_013770 | 1000 | 118   | 0 | 2  | P  | 21nt upstream of gene PMM0648;                          |
| 619599 + | TSS_003889 | 1000 | 509   | 0 | 1  | P  | 17nt upstream of gene PMM0649;                          |
| 620989 - | TSS_013774 | 1000 | 3636  | 0 | 5  | P  | 13nt upstream of gene PMM0651;                          |
| 621700 - | TSS_013778 | 1000 | 548   | 0 | 0  | P  | 156nt upstream of gene PMM0652;                         |
| 624037 - | TSS_013788 | 1000 | 228   | 0 | 4  | O  | -                                                       |
| 624976 + | TSS_003899 | 1000 | 272   | 0 | 4  | I  | within gene(s) PMM0658;                                 |
| 626301 + | TSS_003905 | 1000 | 769   | 0 | 1  | I  | within gene(s) PMM0659;                                 |
| 627516 + | TSS_003908 | 1000 | 609   | 0 | 0  | O  | -                                                       |
| 627971 - | TSS_013796 | 1000 | 18199 | 0 | 3  | O  | -                                                       |
| 628169 + | TSS_003910 | 1000 | 4276  | 0 | 2  | O  | -                                                       |
| 628505 - | TSS_013812 | 1000 | 226   | 0 | 3  | I  | within gene(s) PMM0660;                                 |
| 628656 - | TSS_013813 | 1000 | 640   | 0 | 0  | P  | 10nt upstream of gene PMM0660;                          |
| 629618 - | TSS_013837 | 1000 | 197   | 0 | 0  | I  | within gene(s) PMM0661;                                 |
| 630363 - | TSS_013863 | 1000 | 135   | 0 | 9  | I  | within gene(s) PMM0661;                                 |
| 631116 - | TSS_013882 | 1000 | 2524  | 0 | 1  | I  | within gene(s) PMM0661;                                 |
| 631165 + | TSS_003929 | 1000 | 252   | 0 | 0  | P  | 27nt upstream of gene PMM0662;                          |
| 633583 + | TSS_003940 | 1000 | 660   | 0 | 1  | P  | 23nt upstream of gene PMM0664;                          |
| 635224 - | TSS_013892 | 1000 | 157   | 0 | 3  | IP | within gene(s) PMM0666; 40nt upstream of gene PMM0665;  |
| 638295 + | TSS_003954 | 1000 | 202   | 0 | 1  | Ai | antisense to gene(s) PMM0670;                           |
| 638760 - | TSS_013903 | 1000 | 113   | 0 | 3  | IP | within gene(s) PMM0671; 217nt upstream of gene PMM0670; |
| 643136 + | TSS_003962 | 1000 | 312   | 0 | 2  | P  | 21nt upstream of gene PMM0675;                          |
| 643669 + | TSS_003964 | 1000 | 809   | 0 | 0  | P  | 25nt upstream of gene PMM0676;                          |
| 644591 + | TSS_003974 | 1000 | 91    | 0 | 3  | I  | within gene(s) PMM0676;                                 |
| 644914 - | TSS_013920 | 1000 | 575   | 0 | 0  | Ad | antisense to gene(s) PMM0676 (4nt downstream);          |
| 647282 - | TSS_013927 | 1000 | 1871  | 0 | 2  | P  | 69nt upstream of gene PMM0678;                          |
| 648438 + | TSS_003986 | 1000 | 87    | 0 | 0  | Ai | antisense to gene(s) PMM0680;                           |
| 649133 + | TSS_003988 | 1000 | 115   | 0 | 0  | I  | within gene(s) PMM0681;                                 |
| 649461 + | TSS_003991 | 1000 | 99    | 0 | 6  | I  | within gene(s) PMM0681;                                 |
| 651413 + | TSS_003994 | 1000 | 149   | 0 | 0  | I  | within gene(s) PMM0683;                                 |
| 652626 + | TSS_003998 | 1000 | 2227  | 0 | 1  | O  | -                                                       |
| 652926 + | TSS_004002 | 1000 | 20477 | 0 | 3  | I  | within gene(s) PMM0684;                                 |

|          |            |      |       |   |       |                                                              |
|----------|------------|------|-------|---|-------|--------------------------------------------------------------|
| 653400 - | TSS_013936 | 1000 | 762   | 0 | 1 Ai  | antisense to gene(s) PMM0685;                                |
| 653980 - | TSS_013939 | 1000 | 38699 | 0 | 2 O   | -                                                            |
| 655217 - | TSS_013942 | 1000 | 123   | 0 | 0 O   | -                                                            |
| 655603 - | TSS_013943 | 1000 | 1369  | 0 | 2 I   | within gene(s) PMM0687;                                      |
| 655934 - | TSS_013946 | 1000 | 1332  | 0 | 1 O   | -                                                            |
| 656679 - | TSS_013953 | 1000 | 495   | 0 | 0 P   | 87nt upstream of gene PMM0688;                               |
| 657528 - | TSS_013961 | 1000 | 3994  | 0 | 4 O   | -                                                            |
| 657710 + | TSS_004013 | 1000 | 586   | 0 | 2 O   | -                                                            |
| 657998 + | TSS_004016 | 1000 | 215   | 0 | 3 O   | -                                                            |
| 659043 - | TSS_013967 | 1000 | 152   | 0 | 3 P   | 15nt upstream of gene PMM0690;                               |
| 659754 + | TSS_004021 | 1000 | 1088  | 0 | 1 Ad  | antisense to gene(s) PMM0691 (2nt downstream);               |
| 660094 - | TSS_013973 | 1000 | 362   | 0 | 6 P   | 133nt upstream of gene PMM0691;                              |
| 660419 - | TSS_013976 | 1000 | 331   | 0 | 6 P   | 22nt upstream of gene PMM0692;                               |
| 661103 - | TSS_013980 | 1000 | 161   | 0 | 2 I   | within gene(s) PMM0693;                                      |
| 661646 + | TSS_004027 | 1000 | 145   | 0 | 0 I   | within gene(s) PMM0694;                                      |
| 661983 + | TSS_004029 | 1000 | 165   | 0 | 2 O   | -                                                            |
| 663678 - | TSS_013985 | 1000 | 438   | 0 | 6 P   | 16nt upstream of gene PMM0697;                               |
| 664058 - | TSS_013988 | 1000 | 105   | 0 | 0 I   | within gene(s) PMM0698;                                      |
| 665165 + | TSS_004038 | 1000 | 2270  | 0 | 5 P   | 16nt upstream of gene PMM0699;                               |
| 667292 + | TSS_004044 | 1000 | 178   | 0 | 2 P   | 14nt upstream of gene PMM0703;                               |
| 668059 + | TSS_004048 | 1000 | 220   | 0 | 2 I   | within gene(s) PMM0704;                                      |
| 668368 + | TSS_004049 | 1000 | 123   | 0 | 0 I   | within gene(s) PMM0704;                                      |
| 669388 + | TSS_004050 | 1000 | 237   | 0 | 0 P   | 12nt upstream of gene PMM0705;                               |
| 671615 - | TSS_013997 | 1000 | 138   | 0 | 0 I   | within gene(s) PMM0707;                                      |
| 672523 - | TSS_014000 | 1000 | 93    | 0 | 0 I   | within gene(s) PMM0708;                                      |
| 674151 + | TSS_004070 | 1000 | 487   | 0 | 0 Ai  | antisense to gene(s) PMM0709;                                |
| 674830 - | TSS_014015 | 1000 | 262   | 0 | 1 I   | within gene(s) PMM0709;                                      |
| 674981 + | TSS_004075 | 1000 | 142   | 0 | 0 Ai  | antisense to gene(s) PMM0709;                                |
| 675828 + | TSS_004078 | 1000 | 17568 | 0 | 6 P   | 26nt upstream of gene PMM0710;                               |
| 676283 + | TSS_004102 | 1000 | 145   | 0 | 1 I   | within gene(s) PMM0710;                                      |
| 676791 - | TSS_014025 | 1000 | 377   | 0 | 1 Ai  | antisense to gene(s) PMM0710;                                |
| 678373 + | TSS_004118 | 1000 | 135   | 0 | 0 Ai  | antisense to gene(s) PMM0712;                                |
| 678437 + | TSS_004120 | 1000 | 317   | 0 | 0 Ai  | antisense to gene(s) PMM0712;                                |
| 680440 - | TSS_014034 | 1000 | 521   | 0 | 0 P   | 15nt upstream of gene PMM0713;                               |
| 680511 - | TSS_014035 | 1000 | 225   | 0 | 0 Pai | 86nt upstream of gene PMM0713; antisense to gene(s) PMM0714; |
| 680855 - | TSS_014036 | 1000 | 116   | 0 | 0 Ai  | antisense to gene(s) PMM0714;                                |
| 682685 - | TSS_014037 | 1000 | 155   | 0 | 0 P   | 0nt upstream of gene PMM0717;                                |
| 685615 - | TSS_014039 | 1000 | 1215  | 0 | 5 P   | 13nt upstream of gene PMM0722;                               |
| 687667 + | TSS_004132 | 1000 | 703   | 0 | 0 IP  | within gene(s) PMM0724; 61nt upstream of gene PMM0725;       |
| 688326 - | TSS_014046 | 1000 | 489   | 0 | 0 Ai  | antisense to gene(s) PMM0725;                                |
| 688353 + | TSS_004139 | 1000 | 406   | 0 | 0 I   | within gene(s) PMM0725;                                      |
| 688629 + | TSS_004141 | 1000 | 169   | 0 | 0 O   | -                                                            |
| 688866 + | TSS_004143 | 1000 | 3889  | 0 | 2 O   | -                                                            |
| 689593 - | TSS_019603 | 1000 | 102   | 0 | 4 P   | 17nt upstream of gene PMM0726;                               |
| 696382 - | TSS_014057 | 1000 | 195   | 0 | 0 P   | 18nt upstream of gene PMM0732;                               |
| 698300 - | TSS_014059 | 1000 | 579   | 0 | 3 P   | 15nt upstream of gene PMM0734;                               |
| 699080 + | TSS_004151 | 1000 | 170   | 0 | 7 O   | -                                                            |
| 702227 - | TSS_014073 | 1000 | 274   | 0 | 2 P   | 16nt upstream of gene PMM0739;                               |
| 702332 + | TSS_004158 | 1000 | 2809  | 0 | 5 P   | 11nt upstream of gene PMM0740;                               |
| 702516 - | TSS_014076 | 1000 | 560   | 0 | 0 O   | -                                                            |
| 703275 + | TSS_004162 | 1000 | 855   | 0 | 1 P   | 17nt upstream of gene PMM0742;                               |
| 703511 + | TSS_004164 | 1000 | 106   | 0 | 1 I   | within gene(s) PMM0742;                                      |
| 704459 - | TSS_014101 | 1000 | 307   | 0 | 0 I   | within gene(s) PMM0743;                                      |
| 705461 - | TSS_014138 | 1000 | 224   | 0 | 0 I   | within gene(s) PMM0743;                                      |
| 705815 - | TSS_014145 | 1000 | 741   | 0 | 1 P   | 23nt upstream of gene PMM0743;                               |
| 706437 + | TSS_004187 | 1000 | 112   | 0 | 0 Ai  | antisense to gene(s) PMM0745;                                |
| 708310 + | TSS_004191 | 1000 | 1900  | 0 | 2 Ai  | antisense to gene(s) PMM0746;                                |
| 708607 - | TSS_014151 | 1000 | 682   | 0 | 1 P   | 14nt upstream of gene PMM0746;                               |
| 710247 + | TSS_004196 | 1000 | 216   | 0 | 1 IP  | within gene(s) PMM0748; 23nt upstream of gene PMM0749;       |
| 711092 + | TSS_004204 | 1000 | 166   | 0 | 0 I   | within gene(s) PMM0749;                                      |
| 711431 - | TSS_014159 | 1000 | 110   | 0 | 0 Ai  | antisense to gene(s) PMM0749;                                |
| 711539 + | TSS_004206 | 1000 | 1916  | 0 | 1 I   | within gene(s) PMM0750;                                      |
| 711829 - | TSS_014161 | 1000 | 1000  | 0 | 6 Ai  | antisense to gene(s) PMM0750;                                |
| 712163 + | TSS_004209 | 1000 | 1528  | 0 | 0 IP  | within gene(s) PMM0750; 42nt upstream of gene PMM0751;       |
| 713700 + | TSS_004218 | 1000 | 246   | 0 | 5 I   | within gene(s) PMM0753;                                      |
| 713922 + | TSS_004224 | 1000 | 258   | 0 | 0 I   | within gene(s) PMM0753;                                      |
| 714097 + | TSS_004239 | 1000 | 1494  | 0 | 4 IP  | within gene(s) PMM0753; 130nt upstream of gene PMM0754;      |
| 716611 + | TSS_004255 | 1000 | 164   | 0 | 1 I   | within gene(s) PMM0756;                                      |
| 719060 + | TSS_004263 | 1000 | 126   | 0 | 2 I   | within gene(s) PMM0757;                                      |
| 720208 + | TSS_004270 | 1000 | 204   | 0 | 1 Ai  | antisense to gene(s) PMM0758;                                |
| 720641 - | TSS_014207 | 1000 | 760   | 0 | 1 I   | within gene(s) PMM0758;                                      |
| 721002 - | TSS_014217 | 1000 |       | 0 | 0 P   | 15nt upstream of gene PMM0758;                               |
| 721555 - | TSS_014218 | 1000 | 143   | 0 | 0 Ai  | antisense to gene(s) PMM0759;                                |
| 723763 - | TSS_014249 | 1000 | 1162  | 0 | 24 I  | within gene(s) PMM0760;                                      |
| 724438 - | TSS_014296 | 1000 | 265   | 0 | 18 I  | within gene(s) PMM0760;                                      |
| 724578 - | TSS_014299 | 1000 | 5737  | 0 | 2 P   | 20nt upstream of gene PMM0760;                               |
| 725488 + | TSS_004283 | 1000 | 384   | 0 | 4 P   | 25nt upstream of gene PMM0762;                               |
| 728301 - | TSS_014311 | 1000 | 314   | 0 | 0 Ai  | antisense to gene(s) PMM0764;                                |
| 729981 - | TSS_014324 | 1000 | 235   | 0 | 1 I   | within gene(s) PMM0766;                                      |
| 730261 - | TSS_014326 | 1000 | 767   | 0 | 2 P   | 15nt upstream of gene PMM0766;                               |
| 730331 + | TSS_004332 | 1000 | 673   | 0 | 0 P   | 103nt upstream of gene PMM0767;                              |

|          |            |      |       |   |       |                                                              |
|----------|------------|------|-------|---|-------|--------------------------------------------------------------|
| 730435 + | TSS_004333 | 1000 | 1078  | 0 | 1 I   | within gene(s) PMM0767;                                      |
| 730737 + | TSS_004340 | 1000 | 289   | 0 | 7 I   | within gene(s) PMM0767;                                      |
| 730925 + | TSS_004346 | 1000 | 146   | 0 | 6 I   | within gene(s) PMM0767;                                      |
| 731386 - | TSS_014336 | 1000 | 84    | 0 | 1 Ai  | antisense to gene(s) PMM0767;                                |
| 732872 + | TSS_004368 | 1000 | 2217  | 0 | 6 P   | 21nt upstream of gene PMM0769;                               |
| 733226 - | TSS_014345 | 1000 | 247   | 0 | 0 Ai  | antisense to gene(s) PMM0769;                                |
| 734116 - | TSS_014356 | 1000 | 332   | 0 | 4 Ai  | antisense to gene(s) PMM0769;                                |
| 734269 + | TSS_004413 | 1000 | 2128  | 0 | 4 P   | 18nt upstream of gene PMM0770;                               |
| 736446 + | TSS_004421 | 1000 | 162   | 0 | 5 P   | 15nt upstream of gene PMM0772;                               |
| 737785 - | TSS_014366 | 1000 | 152   | 0 | 0 I   | within gene(s) PMM0774;                                      |
| 738561 + | TSS_004430 | 1000 | 174   | 0 | 0 Ai  | antisense to gene(s) PMM0774;                                |
| 738854 - | TSS_014379 | 1000 | 94    | 0 | 6 I   | within gene(s) PMM0774;                                      |
| 738964 - | TSS_014383 | 1000 | 241   | 0 | 1 I   | within gene(s) PMM0774;                                      |
| 739095 - | TSS_014385 | 1000 | 1287  | 0 | 1 P   | 13nt upstream of gene PMM0774;                               |
| 739410 - | TSS_014389 | 1000 | 1611  | 0 | 10 P  | 14nt upstream of gene PMM0775;                               |
| 740068 + | TSS_004436 | 1000 | 586   | 0 | 2 P   | 38nt upstream of gene PMM0777;                               |
| 741992 + | TSS_004444 | 1000 | 969   | 0 | 1 P   | 15nt upstream of gene PMM0779;                               |
| 744091 - | TSS_014493 | 1000 | 12130 | 0 | 3 P   | 43nt upstream of gene PMM0781;                               |
| 745876 + | TSS_004461 | 1000 | 117   | 0 | 1 Ai  | antisense to gene(s) PMM0784;                                |
| 746288 - | TSS_014510 | 1000 | 396   | 0 | 2 I   | within gene(s) PMM0784;                                      |
| 746584 - | TSS_020211 | 1000 | 2641  | 0 | 5 P   | 18nt upstream of gene PMM0784;                               |
| 747387 - | TSS_014538 | 1000 | 621   | 0 | 9 I   | within gene(s) PMM0785;                                      |
| 747664 - | TSS_020215 | 1000 | 4971  | 0 | 2 P   | 15nt upstream of gene PMM0785;                               |
| 749173 - | TSS_014552 | 1000 | 171   | 0 | 4 I   | within gene(s) PMM0787;                                      |
| 752029 - | TSS_014566 | 1000 | 214   | 0 | 8 P   | 25nt upstream of gene PMM0790;                               |
| 752047 + | TSS_004480 | 1000 | 1694  | 0 | 6 Ai  | antisense to gene(s) PMM0791;                                |
| 752129 + | TSS_004481 | 1000 | 168   | 0 | 0 Ai  | antisense to gene(s) PMM0791;                                |
| 755386 - | TSS_014570 | 1000 | 1279  | 0 | 3 IP  | within gene(s) PMM0795; 114nt upstream of gene PMM0794;      |
| 757822 - | TSS_014579 | 1000 | 128   | 0 | 0 P   | 66nt upstream of gene PMM0796;                               |
| 759405 + | TSS_004488 | 1000 | 99    | 0 | 2 P   | 16nt upstream of gene PMM0799;                               |
| 760249 - | TSS_014587 | 1000 | 97    | 0 | 11 P  | 17nt upstream of gene PMM0800;                               |
| 760930 - | TSS_014591 | 1000 | 187   | 0 | 1 P   | 14nt upstream of gene PMM0801;                               |
| 762992 + | TSS_004493 | 1000 | 1567  | 0 | 0 P   | 16nt upstream of gene PMM0804;                               |
| 763063 + | TSS_004496 | 1000 | 306   | 0 | 17 I  | within gene(s) PMM0804;                                      |
| 764067 + | TSS_004528 | 1000 | 432   | 0 | 0 Ai  | antisense to gene(s) PMM0806;                                |
| 764468 - | TSS_014604 | 1000 | 209   | 0 | 3 P   | 26nt upstream of gene PMM0806;                               |
| 768634 - | TSS_014612 | 1000 | 1000  | 0 | 1 P   | 16nt upstream of gene PMM0810;                               |
| 768967 - | TSS_014614 | 1000 | 119   | 0 | 0 O   | -                                                            |
| 769201 - | TSS_014615 | 1000 | 98    | 0 | 0 O   | -                                                            |
| 771730 - | TSS_014625 | 1000 | 397   | 0 | 1 P   | 22nt upstream of gene PMM0814;                               |
| 771982 + | TSS_004541 | 1000 | 135   | 0 | 5 O   | -                                                            |
| 772207 - | TSS_014626 | 1000 | 165   | 0 | 0 O   | -                                                            |
| 773820 - | TSS_014639 | 1000 | 545   | 0 | 1 P   | 20nt upstream of gene PMM0818;                               |
| 774773 - | TSS_014642 | 1000 | 2534  | 0 | 3 P   | 18nt upstream of gene PMM0819;                               |
| 775070 - | TSS_014646 | 1000 | 255   | 0 | 1 P   | 49nt upstream of gene PMM0820;                               |
| 775810 - | TSS_014647 | 1000 | 153   | 0 | 0 O   | -                                                            |
| 777149 - | TSS_014653 | 1000 | 566   | 0 | 0 I   | within gene(s) PMM0821;                                      |
| 778980 - | TSS_014664 | 1000 | 140   | 0 | 2 P   | 19nt upstream of gene PMM0824;                               |
| 784311 + | TSS_004585 | 1000 | 129   | 0 | 0 PAi | 76nt upstream of gene PMM0828; antisense to gene(s) PMM0827; |
| 784601 + | TSS_004586 | 1000 | 324   | 0 | 0 P   | 14nt upstream of gene PMM0829;                               |
| 784835 + | TSS_004587 | 1000 | 153   | 0 | 0 I   | within gene(s) PMM0829;                                      |
| 787909 - | TSS_014765 | 1000 | 457   | 0 | 10 I  | within gene(s) PMM0831;                                      |
| 789844 - | TSS_014847 | 1000 | 102   | 0 | 2 I   | within gene(s) PMM0831;                                      |
| 790206 - | TSS_014848 | 1000 | 0     | 0 | 1 I   | 17nt upstream of gene PMM0831;                               |
| 790790 + | TSS_004627 | 1000 | 108   | 0 | 5 I   | within gene(s) PMM0832;                                      |
| 796520 + | TSS_004635 | 1000 | 392   | 0 | 1 Ai  | antisense to gene(s) PMM0839;                                |
| 800875 - | TSS_014874 | 1000 | 107   | 0 | 0 I   | within gene(s) PMM0842;                                      |
| 803506 - | TSS_014887 | 1000 | 103   | 0 | 12 I  | within gene(s) PMM0844;                                      |
| 804298 - | TSS_014919 | 1000 | 2803  | 0 | 2 P   | 14nt upstream of gene PMM0844;                               |
| 807762 - | TSS_014931 | 1000 | 222   | 0 | 2 P   | 29nt upstream of gene PMM0847;                               |
| 808842 + | TSS_004657 | 1000 | 7629  | 0 | 6 P   | 117nt upstream of gene PMM0851;                              |
| 810234 - | TSS_014951 | 1000 | 0     | 0 | 0 P   | 16nt upstream of gene PMM0853;                               |
| 811735 - | TSS_014957 | 1000 | 480   | 0 | 0 Ai  | antisense to gene(s) PMM0854;                                |
| 813572 - | TSS_014996 | 1000 | 7484  | 0 | 12 P  | 45nt upstream of gene PMM0856;                               |
| 814241 - | TSS_015003 | 1000 | 105   | 0 | 0 P   | 14nt upstream of gene PMM0857;                               |
| 814913 + | TSS_004676 | 1000 | 1940  | 0 | 2 O   | -                                                            |
| 815258 - | TSS_015011 | 1000 | 140   | 0 | 0 O   | -                                                            |
| 816976 + | TSS_004681 | 1000 | 1777  | 0 | 1 O   | -                                                            |
| 817333 + | TSS_004684 | 1000 | 1391  | 0 | 3 O   | -                                                            |
| 817753 + | TSS_004688 | 1000 | 92    | 0 | 3 O   | -                                                            |
| 818781 + | TSS_004689 | 1000 | 137   | 0 | 0 O   | -                                                            |
| 819403 - | TSS_015025 | 1000 | 194   | 0 | 2 O   | -                                                            |
| 820064 - | TSS_015029 | 1000 | 185   | 0 | 0 O   | -                                                            |
| 821702 - | TSS_015036 | 1000 | 107   | 0 | 2 P   | 16nt upstream of gene PMM0864;                               |
| 824596 - | TSS_015053 | 1000 | 106   | 0 | 10 P  | 21nt upstream of gene PMM0867;                               |
| 826236 - | TSS_015057 | 1000 | 537   | 0 | 7 IP  | within gene(s) PMM0870; 156nt upstream of gene PMM0869;      |
| 826307 - | TSS_020771 | 1000 | 9271  | 0 | 6 P   | 24nt upstream of gene PMM0870;                               |
| 827556 - | TSS_015062 | 1000 | 343   | 0 | 0 Ai  | antisense to gene(s) PMM0871;                                |
| 828957 + | TSS_007140 | 1000 | 17983 | 0 | 2 I   | within gene(s) PMM0872;                                      |
| 831934 + | TSS_004724 | 1000 | 128   | 0 | 0 Ai  | antisense to gene(s) PMM0875;                                |
| 832333 + | TSS_004726 | 1000 | 533   | 0 | 3 P   | 14nt upstream of gene PMM0876;                               |

|          |            |      |       |   |       |                                                               |
|----------|------------|------|-------|---|-------|---------------------------------------------------------------|
| 832529 - | TSS_015072 | 1000 | 211   | 0 | 2 Ai  | antisense to gene(s) PMM0876;                                 |
| 834878 - | TSS_015079 | 1000 | 1040  | 0 | 3 I   | within gene(s) PMM0877;                                       |
| 835327 + | TSS_004733 | 1000 | 97    | 0 | 5 Ai  | antisense to gene(s) PMM0877;                                 |
| 837146 - | TSS_015092 | 1000 | 693   | 0 | 2 P   | 38nt upstream of gene PMM0878;                                |
| 840244 - | TSS_015098 | 1000 | 162   | 0 | 2 Ai  | antisense to gene(s) PMM0879;                                 |
| 841241 - | TSS_015102 | 1000 | 166   | 0 | 0 I   | within gene(s) PMM0880;                                       |
| 842149 - | TSS_015104 | 1000 | 202   | 0 | 0 I   | within gene(s) PMM0881;                                       |
| 844697 - | TSS_015118 | 1000 | 4359  | 0 | 5 P   | 15nt upstream of gene PMM0883;                                |
| 845195 - | TSS_015123 | 1000 | 105   | 0 | 0 Ai  | antisense to gene(s) PMM0884;                                 |
| 855315 + | TSS_004770 | 1000 | 156   | 0 | 2 P   | 49nt upstream of gene PMM0893;                                |
| 857485 - | TSS_015161 | 1000 | 475   | 0 | 6 I   | within gene(s) PMM0894;                                       |
| 857549 - | TSS_015164 | 1000 | 8309  | 0 | 3 P   | 18nt upstream of gene PMM0894;                                |
| 858686 - | TSS_015176 | 1000 | 450   | 0 | 0 I   | within gene(s) PMM0896;                                       |
| 858957 - | TSS_015178 | 1000 | 568   | 0 | 1 IP  | within gene(s) PMM0897; 21nt upstream of gene PMM0896;        |
| 859899 + | TSS_004788 | 1000 | 615   | 0 | 0 Ai  | antisense to gene(s) PMM0897;                                 |
| 860406 - | TSS_015192 | 1000 | 2085  | 0 | 2 I   | within gene(s) PMM0897;                                       |
| 860982 - | TSS_015200 | 1000 | 417   | 0 | 2 P   | 65nt upstream of gene PMM0897;                                |
| 862187 + | TSS_004797 | 1000 | 150   | 0 | 6 I   | within gene(s) PMM0899;                                       |
| 862487 - | TSS_015205 | 1000 | 179   | 0 | 0 Ai  | antisense to gene(s) PMM0899;                                 |
| 863809 + | TSS_004803 | 1000 | 2300  | 0 | 2 P   | 23nt upstream of gene PMM0901;                                |
| 863967 + | TSS_004806 | 1000 | 163   | 0 | 1 I   | within gene(s) PMM0901;                                       |
| 864270 + | TSS_004816 | 1000 | 117   | 0 | 3 I   | within gene(s) PMM0901;                                       |
| 865761 + | TSS_004829 | 1000 | 570   | 0 | 1 P   | 15nt upstream of gene PMM0902;                                |
| 865990 - | TSS_015214 | 1000 | 89    | 0 | 0 Ai  | antisense to gene(s) PMM0902;                                 |
| 867288 + | TSS_004837 | 1000 | 477   | 0 | 0 I   | within gene(s) PMM0906;                                       |
| 867687 + | TSS_004841 | 1000 | 209   | 0 | 0 Ai  | antisense to gene(s) PMM0907;                                 |
| 867831 + | TSS_004843 | 1000 | 126   | 0 | 0 Ai  | antisense to gene(s) PMM0907;                                 |
| 868162 - | TSS_015227 | 1000 | 116   | 0 | 0 I   | within gene(s) PMM0907;                                       |
| 869052 + | TSS_004851 | 1000 | 124   | 0 | 7 Ai  | antisense to gene(s) PMM0907;                                 |
| 869447 - | TSS_015250 | 1000 | 10105 | 0 | 5 P   | 16nt upstream of gene PMM0907;                                |
| 869708 + | TSS_004857 | 1000 | 243   | 0 | 2 I   | within gene(s) PMM0908;                                       |
| 870149 + | TSS_004859 | 1000 | 175   | 0 | 0 I   | within gene(s) PMM0908;                                       |
| 871670 + | TSS_004866 | 1000 | 168   | 0 | 1 P   | 15nt upstream of gene PMM0910;                                |
| 872329 - | TSS_015264 | 1000 | 155   | 0 | 1 P   | 33nt upstream of gene PMM0911;                                |
| 873612 + | TSS_004883 | 1000 | 437   | 0 | 2 I   | within gene(s) PMM0912;                                       |
| 876780 + | TSS_004892 | 1000 | 97    | 0 | 0 I   | within gene(s) PMM0916;                                       |
| 881167 - | TSS_015286 | 1000 | 1216  | 0 | 2 P   | 15nt upstream of gene PMM0919;                                |
| 881352 + | TSS_004909 | 1000 | 7081  | 0 | 4 P   | 15nt upstream of gene PMM0920;                                |
| 883958 + | TSS_004977 | 1000 | 126   | 0 | 3 P   | 15nt upstream of gene PMM0922;                                |
| 885534 - | TSS_015310 | 1000 | 174   | 0 | 0 PAi | 91nt upstream of gene PMM0924; antisense to gene(s) PMM0925;  |
| 886557 + | TSS_004989 | 1000 | 1539  | 0 | 7 P   | 14nt upstream of gene PMM0926;                                |
| 889213 + | TSS_004994 | 1000 | 256   | 0 | 0 Ai  | antisense to gene(s) PMM0929;                                 |
| 891056 + | TSS_005002 | 1000 | 107   | 0 | 3 Ai  | antisense to gene(s) PMM0930;                                 |
| 891599 - | TSS_015341 | 1000 | 4600  | 0 | 1 P   | 21nt upstream of gene PMM0930;                                |
| 893051 - | TSS_015345 | 1000 | 91    | 0 | 3 IP  | within gene(s) PMM0933; 12nt upstream of gene PMM0932;        |
| 894754 + | TSS_005009 | 1000 | 124   | 0 | 0 P   | 45nt upstream of gene PMM0936;                                |
| 899977 + | TSS_005022 | 1000 | 832   | 0 | 3 P   | 13nt upstream of gene PMM0941;                                |
| 900053 + | TSS_005025 | 1000 | 303   | 0 | 0 I   | within gene(s) PMM0941;                                       |
| 901047 + | TSS_005044 | 1000 | 32185 | 0 | 9 P   | 14nt upstream of gene PMM0943;                                |
| 905299 - | TSS_015375 | 1000 | 1429  | 0 | 2 P   | 14nt upstream of gene PMM0945;                                |
| 906542 - | TSS_015389 | 1000 | 280   | 0 | 0 I   | within gene(s) PMM0946;                                       |
| 907099 - | TSS_015394 | 1000 | 1792  | 0 | 3 P   | 6nt upstream of gene PMM0947;                                 |
| 911843 - | TSS_015410 | 1000 | 93    | 0 | 3 P   | 14nt upstream of gene PMM0953;                                |
| 913344 + | TSS_005068 | 1000 | 503   | 0 | 0 I   | within gene(s) PMM0954;                                       |
| 913440 + | TSS_005069 | 1000 | 392   | 0 | 0 IP  | within gene(s) PMM0954; 246nt upstream of gene PMM0955;       |
| 913823 + | TSS_005072 | 1000 | 260   | 0 | 3 I   | within gene(s) PMM0955;                                       |
| 914442 + | TSS_005074 | 1000 | 302   | 0 | 1 O   | -                                                             |
| 914689 - | TSS_015414 | 1000 | 451   | 0 | 2 O   | -                                                             |
| 915624 + | TSS_005077 | 1000 | 205   | 0 | 2 P   | 2nt upstream of gene PMM0957;                                 |
| 916221 - | TSS_015420 | 1000 | 149   | 0 | 2 O   | -                                                             |
| 916530 - | TSS_015423 | 1000 | 532   | 0 | 6 P   | 16nt upstream of gene PMM0958;                                |
| 918232 + | TSS_005082 | 1000 | 206   | 0 | 0 Ai  | antisense to gene(s) PMM0960;                                 |
| 918396 - | TSS_015429 | 1000 | 224   | 0 | 0 IP  | within gene(s) PMM0961; 47nt upstream of gene PMM0960;        |
| 919141 - | TSS_015430 | 1000 | 227   | 0 | 0 I   | within gene(s) PMM0961;                                       |
| 920008 + | TSS_005090 | 1000 | 91    | 0 | 1 PAi | 153nt upstream of gene PMM0962; antisense to gene(s) PMM0961; |
| 920682 - | TSS_015432 | 1000 | 209   | 0 | 0 Ai  | antisense to gene(s) PMM0962;                                 |
| 922689 + | TSS_005102 | 1000 | 261   | 0 | 2 Ai  | antisense to gene(s) PMM0963;                                 |
| 923723 - | TSS_015443 | 1000 | 293   | 0 | 0 I   | within gene(s) PMM0965;                                       |
| 923809 - | TSS_015445 | 1000 | 155   | 0 | 4 IP  | within gene(s) PMM0966; 85nt upstream of gene PMM0965;        |
| 924547 - | TSS_015448 | 1000 | 348   | 0 | 0 I   | within gene(s) PMM0966;                                       |
| 926558 + | TSS_005119 | 1000 | 20904 | 0 | 5 P   | 10nt upstream of gene PMM0970;                                |
| 926646 + | TSS_005123 | 1000 | 122   | 0 | 1 I   | within gene(s) PMM0970;                                       |
| 927259 + | TSS_005142 | 1000 | 250   | 0 | 0 I   | within gene(s) PMM0970;                                       |
| 927406 + | TSS_005145 | 1000 | 186   | 0 | 1 I   | within gene(s) PMM0970;                                       |
| 929465 - | TSS_015467 | 1000 | 123   | 0 | 1 Ai  | antisense to gene(s) PMM0972;                                 |
| 930151 + | TSS_005157 | 1000 | 182   | 0 | 0 IP  | within gene(s) PMM0972; 101nt upstream of gene PMM0973;       |
| 930208 - | TSS_015472 | 1000 | 571   | 0 | 4 Ai  | antisense to gene(s) PMM0972;                                 |
| 931059 + | TSS_005159 | 1000 | 154   | 0 | 0 I   | within gene(s) PMM0974;                                       |
| 933017 + | TSS_005163 | 1000 | 385   | 0 | 0 I   | within gene(s) PMM0975;                                       |
| 936929 + | TSS_005169 | 1000 | 141   | 0 | 1 O   | -                                                             |
| 937963 + | TSS_005172 | 1000 | 1335  | 0 | 1 P   | 15nt upstream of gene PMM0982;                                |

|           |            |      |       |   |      |                                                         |
|-----------|------------|------|-------|---|------|---------------------------------------------------------|
| 939028 -  | TSS_015485 | 1000 | 355   | 0 | 0 P  | 17nt upstream of gene PMM0983;                          |
| 939168 +  | TSS_008103 | 1000 | 3048  | 0 | 2 O  | -                                                       |
| 941587 +  | TSS_005179 | 1000 | 774   | 0 | 6 P  | 17nt upstream of gene PMM0987;                          |
| 942377 -  | TSS_015491 | 1000 | 525   | 0 | 0 P  | 126nt upstream of gene PMM0988;                         |
| 945784 +  | TSS_005187 | 1000 | 1372  | 0 | 3 P  | 20nt upstream of gene PMM0992;                          |
| 946441 +  | TSS_005190 | 1000 | 285   | 0 | 0 Ai | antisense to gene(s) PMM0993;                           |
| 946927 -  | TSS_015497 | 1000 | 1243  | 0 | 4 P  | 16nt upstream of gene PMM0993;                          |
| 947802 +  | TSS_005194 | 1000 | 98    | 0 | 0 O  | -                                                       |
| 948048 +  | TSS_008123 | 1000 | 0     | 0 | 9 P  | 17nt upstream of gene PMM0996;                          |
| 948628 +  | TSS_008123 | 1000 | 0     | 0 | 1 O  | -                                                       |
| 949329 -  | TSS_021293 | 1000 | 16289 | 0 | 1 O  | -                                                       |
| 950002 +  | TSS_005199 | 1000 | 1210  | 0 | 1 P  | 15nt upstream of gene PMM0999;                          |
| 950681 +  | TSS_005200 | 1000 | 168   | 0 | 0 P  | 15nt upstream of gene PMM1001;                          |
| 952881 -  | TSS_015509 | 1000 | 85    | 0 | 1 Ai | antisense to gene(s) PMM1002;                           |
| 956897 -  | TSS_015517 | 1000 | 2433  | 0 | 5 P  | 17nt upstream of gene PMM1005;                          |
| 958314 -  | TSS_015596 | 1000 | 237   | 0 | 0 P  | 15nt upstream of gene PMM1007;                          |
| 958766 -  | TSS_015597 | 1000 | 211   | 0 | 0 P  | 26nt upstream of gene PMM1008;                          |
| 958974 +  | TSS_005251 | 1000 | 106   | 0 | 0 I  | within gene(s) PMM1009;                                 |
| 960692 -  | TSS_015599 | 1000 | 152   | 0 | 2 P  | 16nt upstream of gene PMM1011;                          |
| 961818 +  | TSS_005256 | 1000 | 362   | 0 | 3 P  | 14nt upstream of gene PMM1013;                          |
| 963397 -  | TSS_015603 | 1000 | 93    | 0 | 0 P  | 14nt upstream of gene PMM1015;                          |
| 968005 +  | TSS_005275 | 1000 | 250   | 0 | 5 I  | within gene(s) PMM1022;                                 |
| 971676 -  | TSS_015615 | 1000 | 150   | 0 | 0 P  | 4nt upstream of gene PMM1026;                           |
| 972175 -  | TSS_015616 | 1000 | 1054  | 0 | 2 O  | -                                                       |
| 972740 +  | TSS_005279 | 1000 | 643   | 0 | 0 P  | 166nt upstream of gene PMM1028;                         |
| 973076 -  | TSS_015619 | 1000 | 333   | 0 | 1 Ai | antisense to gene(s) PMM1028;                           |
| 973232 +  | TSS_005282 | 1000 | 1040  | 0 | 0 O  | -                                                       |
| 974221 +  | TSS_005287 | 1000 | 1174  | 0 | 1 P  | 27nt upstream of gene PMM1030;                          |
| 975550 +  | TSS_005290 | 1000 | 125   | 0 | 0 P  | 17nt upstream of gene PMM1032;                          |
| 977043 +  | TSS_008322 | 1000 | 2254  | 0 | 6 P  | 32nt upstream of gene PMM1033;                          |
| 977685 -  | TSS_015634 | 1000 | 145   | 0 | 0 Ai | antisense to gene(s) PMM1033;                           |
| 979706 -  | TSS_015644 | 1000 | 278   | 0 | 2 O  | -                                                       |
| 979901 +  | TSS_015644 | 1000 | 0     | 0 | 1 O  | -                                                       |
| 981600 +  | TSS_005321 | 1000 | 182   | 0 | 0 I  | within gene(s) PMM1038;                                 |
| 983461 +  | TSS_005326 | 1000 | 117   | 0 | 3 I  | within gene(s) PMM1039;                                 |
| 984870 +  | TSS_005332 | 1000 | 145   | 0 | 0 I  | within gene(s) PMM1041;                                 |
| 985398 +  | TSS_005333 | 1000 | 597   | 0 | 0 IP | within gene(s) PMM1041; 91nt upstream of gene PMM1042;  |
| 985522 +  | TSS_005334 | 1000 | 588   | 0 | 0 I  | within gene(s) PMM1042;                                 |
| 995402 +  | TSS_005346 | 1000 | 191   | 0 | 0 Ad | antisense to gene(s) PMM1053 (3nt downstream);          |
| 996144 -  | TSS_015671 | 1000 | 276   | 0 | 0 IP | within gene(s) PMM1054; 183nt upstream of gene PMM1053; |
| 997566 -  | TSS_015689 | 1000 | 223   | 0 | 1 P  | 29nt upstream of gene PMM1055;                          |
| 998948 -  | TSS_015693 | 1000 | 138   | 0 | 0 I  | within gene(s) PMM1057;                                 |
| 998966 +  | TSS_005355 | 1000 | 2498  | 0 | 2 P  | 23nt upstream of gene PMM1058;                          |
| 1000663 - | TSS_015701 | 1000 | 909   | 0 | 3 P  | 16nt upstream of gene PMM1061;                          |
| 1000796 - | TSS_015705 | 1000 | 19666 | 0 | 3 P  | 149nt upstream of gene PMM1061;                         |
| 1000995 - | TSS_015707 | 1000 | 162   | 0 | 1 I  | within gene(s) PMM1062;                                 |
| 1001106 + | TSS_005361 | 1000 | 584   | 0 | 1 Ai | antisense to gene(s) PMM1062;                           |
| 1001916 - | TSS_015710 | 1000 | 134   | 0 | 0 I  | within gene(s) PMM1062;                                 |
| 1002034 - | TSS_015713 | 1000 | 100   | 0 | 1 P  | 15nt upstream of gene PMM1062;                          |
| 1002186 + | TSS_005367 | 1000 | 983   | 0 | 8 P  | 13nt upstream of gene PMM1063;                          |
| 1004709 + | TSS_005390 | 1000 | 216   | 0 | 9 IP | within gene(s) PMM1063; 118nt upstream of gene PMM1064; |
| 1005630 + | TSS_005399 | 1000 | 94    | 0 | 0 I  | within gene(s) PMM1064;                                 |
| 1007850 + | TSS_008477 | 1000 | 9264  | 0 | 5 P  | 14nt upstream of gene PMM1066;                          |
| 1008963 + | TSS_005417 | 1000 | 590   | 0 | 0 I  | within gene(s) PMM1066;                                 |
| 1009566 + | TSS_005430 | 1000 | 212   | 0 | 1 P  | 29nt upstream of gene PMM1067;                          |
| 1011515 + | TSS_005435 | 1000 | 159   | 0 | 0 P  | 31nt upstream of gene PMM1069;                          |
| 1012301 + | TSS_005440 | 1000 | 339   | 0 | 0 IP | within gene(s) PMM1069; 179nt upstream of gene PMM1070; |
| 1013805 - | TSS_015739 | 1000 | 290   | 0 | 0 Ai | antisense to gene(s) PMM1071;                           |
| 1018128 - | TSS_015754 | 1000 | 492   | 0 | 0 P  | 18nt upstream of gene PMM1074;                          |
| 1018655 - | TSS_015770 | 1000 | 776   | 0 | 6 I  | within gene(s) PMM1075;                                 |
| 1019222 - | TSS_015819 | 1000 | 1837  | 0 | 6 I  | within gene(s) PMM1075;                                 |
| 1019352 - | TSS_015821 | 1000 | 3069  | 0 | 2 P  | 16nt upstream of gene PMM1075;                          |
| 1019487 + | TSS_008630 | 1000 | 1756  | 0 | 1 P  | 32nt upstream of gene PMM1076;                          |
| 1020379 - | TSS_015827 | 1000 | 3429  | 0 | 2 I  | within gene(s) PMM1077;                                 |
| 1020982 - | TSS_015832 | 1000 | 196   | 0 | 1 I  | within gene(s) PMM1077;                                 |
| 1021282 - | TSS_015833 | 1000 | 449   | 0 | 0 I  | within gene(s) PMM1077;                                 |
| 1022015 + | TSS_005488 | 1000 | 259   | 0 | 4 P  | 18nt upstream of gene PMM1079;                          |
| 1022762 - | TSS_015837 | 1000 | 291   | 0 | 0 I  | within gene(s) PMM1080;                                 |
| 1023134 + | TSS_005496 | 1000 | 143   | 0 | 6 Ai | antisense to gene(s) PMM1080;                           |
| 1023493 - | TSS_015866 | 1000 | 3209  | 0 | 2 P  | 19nt upstream of gene PMM1080;                          |
| 1023698 + | TSS_005501 | 1000 | 101   | 0 | 3 P  | 26nt upstream of gene PMM1081;                          |
| 1024480 + | TSS_005505 | 1000 | 274   | 0 | 2 I  | within gene(s) PMM1081;                                 |
| 1024757 - | TSS_015871 | 1000 | 214   | 0 | 0 Ai | antisense to gene(s) PMM1081;                           |
| 1028961 + | TSS_005515 | 1000 | 113   | 0 | 0 IP | within gene(s) PMM1084; 27nt upstream of gene PMM1085;  |
| 1029223 - | TSS_015883 | 1000 | 179   | 0 | 0 Ai | antisense to gene(s) PMM1085;                           |
| 1029801 - | TSS_015885 | 1000 | 333   | 0 | 0 Ai | antisense to gene(s) PMM1085;                           |
| 1032155 + | TSS_005522 | 1000 | 550   | 0 | 1 Ai | antisense to gene(s) PMM1088;                           |
| 1034423 - | TSS_016144 | 1000 | 313   | 0 | 30 I | within gene(s) PMM1088;                                 |
| 1034569 - | TSS_016157 | 1000 | 20516 | 0 | 2 P  | 17nt upstream of gene PMM1088;                          |
| 1035252 + | TSS_005561 | 1000 | 774   | 0 | 0 P  | 14nt upstream of gene PMM1090;                          |
| 1036076 + | TSS_005570 | 1000 | 415   | 0 | 7 I  | within gene(s) PMM1090;                                 |

|           |            |      |       |   |       |                                                               |
|-----------|------------|------|-------|---|-------|---------------------------------------------------------------|
| 1037579 - | TSS_016170 | 1000 | 803   | 0 | 0 Ai  | antisense to gene(s) PMM1092;                                 |
| 1038020 + | TSS_005588 | 1000 | 104   | 0 | 0 I   | within gene(s) PMM1092;                                       |
| 1038329 + | TSS_005591 | 1000 | 104   | 0 | 1 IP  | within gene(s) PMM1092; 44nt upstream of gene PMM1093;        |
| 1038879 - | TSS_016175 | 1000 | 222   | 0 | 0 Ai  | antisense to gene(s) PMM1093;                                 |
| 1039004 + | TSS_005596 | 1000 | 164   | 0 | 2 I   | within gene(s) PMM1093;                                       |
| 1041219 + | TSS_005604 | 1000 | 186   | 0 | 0 Ai  | antisense to gene(s) PMM1096;                                 |
| 1041398 - | TSS_016180 | 1000 | 116   | 0 | 0 I   | within gene(s) PMM1096;                                       |
| 1041770 + | TSS_005605 | 1000 | 1091  | 0 | 0 Ai  | antisense to gene(s) PMM1097;                                 |
| 1042334 - | TSS_016181 | 1000 | 450   | 0 | 0 P   | 14nt upstream of gene PMM1097;                                |
| 1042406 + | TSS_005610 | 1000 | 4569  | 0 | 2 P   | 20nt upstream of gene PMM1098;                                |
| 1042908 - | TSS_016185 | 1000 | 92    | 0 | 0 Ai  | antisense to gene(s) PMM1098;                                 |
| 1046932 - | TSS_016189 | 1000 | 303   | 0 | 0 P   | 81nt upstream of gene PMM1101;                                |
| 1057074 - | TSS_016198 | 1000 | 3783  | 0 | 1 P   | 35nt upstream of gene PMM1107;                                |
| 1058522 + | TSS_005650 | 1000 | 579   | 0 | 3 IP  | within gene(s) PMM1110; 95nt upstream of gene PMM1111;        |
| 1059299 + | TSS_005659 | 1000 | 663   | 0 | 2 P   | 47nt upstream of gene PMM1113;                                |
| 1059858 + | TSS_005663 | 1000 | 494   | 0 | 2 I   | within gene(s) PMM1113;                                       |
| 1060619 + | TSS_005666 | 1000 | 135   | 0 | 2 Ai  | antisense to gene(s) PMM1115;                                 |
| 1063397 + | TSS_005674 | 1000 | 103   | 0 | 1 Ai  | antisense to gene(s) PMM1116;                                 |
| 1063713 + | TSS_005674 | 1000 | 0     | 0 | 1 P   | 21nt upstream of gene PMM1117;                                |
| 1063850 + | TSS_005678 | 1000 | 299   | 0 | 4 O   | -                                                             |
| 1064482 + | TSS_005681 | 1000 | 3270  | 0 | 5 P   | 19nt upstream of gene PMM1118;                                |
| 1065783 - | TSS_016237 | 1000 | 6247  | 0 | 15 I  | within gene(s) PMM1119;                                       |
| 1066209 - | TSS_022609 | 1000 | 0     | 0 | 0 P   | 9nt upstream of gene PMM1119;                                 |
| 1068999 - | TSS_016277 | 1000 | 6247  | 0 | 15 I  | within gene(s) PMM1121;                                       |
| 1069447 - | TSS_016325 | 1000 | 2388  | 0 | 2 P   | 28nt upstream of gene PMM1121;                                |
| 1070354 - | TSS_016328 | 1000 | 137   | 0 | 1 O   | -                                                             |
| 1071430 + | TSS_005748 | 1000 | 111   | 0 | 2 O   | -                                                             |
| 1071927 - | TSS_016346 | 1000 | 224   | 0 | 1 I   | within gene(s) PMM1123;                                       |
| 1072201 - | TSS_016370 | 1000 | 300   | 0 | 18 I  | within gene(s) PMM1123;                                       |
| 1072469 - | TSS_005754 | 1000 | 0     | 0 | 0 P   | 94nt upstream of gene PMM1123;                                |
| 1074287 - | TSS_016385 | 1000 | 430   | 0 | 0 I   | within gene(s) PMM1124;                                       |
| 1076222 + | TSS_005763 | 1000 | 105   | 0 | 0 Ai  | antisense to gene(s) PMM1126;                                 |
| 1078286 - | TSS_016390 | 1000 | 722   | 0 | 1 I   | within gene(s) PMM1127;                                       |
| 1078419 + | TSS_005767 | 1000 | 105   | 0 | 0 Ai  | antisense to gene(s) PMM1127;                                 |
| 1079462 - | TSS_016395 | 1000 | 2047  | 0 | 3 P   | 17nt upstream of gene PMM1128;                                |
| 1080845 + | TSS_005772 | 1000 | 236   | 0 | 5 P   | 24nt upstream of gene PMM1131;                                |
| 1082063 - | TSS_016402 | 1000 | 4318  | 0 | 3 O   | -                                                             |
| 1082218 + | TSS_005782 | 1000 | 2304  | 0 | 4 P   | 51nt upstream of gene PMM1132;                                |
| 1083365 - | TSS_016408 | 1000 | 175   | 0 | 1 Ai  | antisense to gene(s) PMM1132;                                 |
| 1083716 + | TSS_005789 | 1000 | 90    | 0 | 0 I   | within gene(s) PMM1132;                                       |
| 1084946 - | TSS_016416 | 1000 | 432   | 0 | 2 O   | -                                                             |
| 1085043 + | TSS_005790 | 1000 | 1535  | 0 | 1 P   | 19nt upstream of gene PMM1134;                                |
| 1085641 + | TSS_005794 | 1000 | 3234  | 0 | 4 P   | 15nt upstream of gene PMM1135;                                |
| 1086451 - | TSS_016420 | 1000 | 117   | 0 | 0 O   | -                                                             |
| 1087615 + | TSS_005797 | 1000 | 649   | 0 | 1 O   | -                                                             |
| 1089084 - | TSS_016426 | 1000 | 111   | 0 | 6 P   | 38nt upstream of gene PMM1138;                                |
| 1090775 + | TSS_005805 | 1000 | 346   | 0 | 0 I   | within gene(s) PMM1140;                                       |
| 1094754 + | TSS_005813 | 1000 | 851   | 0 | 1 P   | 29nt upstream of gene PMM1142;                                |
| 1095730 + | TSS_005822 | 1000 | 225   | 0 | 0 I   | within gene(s) PMM1142;                                       |
| 1100340 - | TSS_016477 | 1000 | 2022  | 0 | 6 P   | 17nt upstream of gene PMM1147;                                |
| 1100440 + | TSS_005841 | 1000 | 762   | 0 | 1 P   | 16nt upstream of gene PMM1148;                                |
| 1101175 + | TSS_005889 | 1000 | 3190  | 0 | 2 P   | 15nt upstream of gene PMM1149;                                |
| 1101469 + | TSS_005889 | 1000 | 0     | 0 | 0 P   | 8nt upstream of gene PMM1149;                                 |
| 1103158 - | TSS_016496 | 1000 | 3316  | 0 | 2 P   | 16nt upstream of gene PMM1151;                                |
| 1103474 - | TSS_016498 | 1000 | 737   | 0 | 2 O   | -                                                             |
| 1104586 - | TSS_016507 | 1000 | 5481  | 0 | 1 IP  | within gene(s) PMM1152a; 112nt upstream of gene PMM1152;      |
| 1105595 + | TSS_005935 | 1000 | 380   | 0 | 5 IP  | within gene(s) PMM1153; 99nt upstream of gene PMM1154;        |
| 1107430 - | TSS_016510 | 1000 | 1742  | 0 | 4 P   | 2nt upstream of gene PMM1156;                                 |
| 1107587 + | TSS_023319 | 1000 | 0     | 0 | 0 P   | 26nt upstream of gene PMM1157;                                |
| 1108620 + | TSS_006076 | 1000 | 21745 | 0 | 33 IP | within gene(s) PMM1157; 53nt upstream of gene PMM1158;        |
| 1108805 + | TSS_006100 | 1000 | 4926  | 0 | 20 I  | within gene(s) PMM1158;                                       |
| 1114472 + | TSS_006214 | 1000 | 112   | 0 | 6 P   | 107nt upstream of gene PMM1163;                               |
| 1115437 + | TSS_006219 | 1000 | 360   | 0 | 0 O   | -                                                             |
| 1118179 - | TSS_016578 | 1000 | 463   | 0 | 1 P   | 33nt upstream of gene PMM1165;                                |
| 1118495 + | TSS_006222 | 1000 | 169   | 0 | 0 Ai  | antisense to gene(s) PMM1166;                                 |
| 1120049 + | TSS_006228 | 1000 | 2252  | 0 | 1 P   | 15nt upstream of gene PMM1169;                                |
| 1121159 + | TSS_006233 | 1000 | 363   | 0 | 0 Ai  | antisense to gene(s) PMM1171;                                 |
| 1121580 - | TSS_016605 | 1000 | 5960  | 0 | 3 P   | 27nt upstream of gene PMM1171;                                |
| 1122779 + | TSS_006237 | 1000 | 401   | 0 | 3 P   | 17nt upstream of gene PMM1174;                                |
| 1123430 - | TSS_016610 | 1000 | 683   | 0 | 6 Ai  | antisense to gene(s) PMM1175;                                 |
| 1124119 + | TSS_006244 | 1000 | 257   | 0 | 0 I   | within gene(s) PMM1176;                                       |
| 1125577 + | TSS_006247 | 1000 | 99    | 0 | 0 Ai  | antisense to gene(s) PMM1177;                                 |
| 1127018 + | TSS_006253 | 1000 | 515   | 0 | 0 Ai  | antisense to gene(s) PMM1178;                                 |
| 1127626 + | TSS_006258 | 1000 | 2671  | 0 | 2 Ai  | antisense to gene(s) PMM1179;                                 |
| 1127928 + | TSS_006261 | 1000 | 128   | 0 | 1 Ai  | antisense to gene(s) PMM1179;                                 |
| 1128259 + | TSS_006263 | 1000 | 709   | 0 | 1 P   | 28nt upstream of gene PMM1180;                                |
| 1128474 - | TSS_016631 | 1000 | 1880  | 0 | 3 PAi | 241nt upstream of gene PMM1179; antisense to gene(s) PMM1180; |
| 1128570 - | TSS_016634 | 1000 | 1164  | 0 | 1 Ai  | antisense to gene(s) PMM1180;                                 |
| 1130146 + | TSS_006288 | 1000 | 20179 | 0 | 4 P   | 13nt upstream of gene PMM1183;                                |
| 1130398 - | TSS_016644 | 1000 | 521   | 0 | 0 Ai  | antisense to gene(s) PMM1184;                                 |
| 1130649 + | TSS_006293 | 1000 | 1861  | 0 | 0 IP  | within gene(s) PMM1184; 44nt upstream of gene PMM1185;        |

|           |            |      |       |   |       |                                                               |
|-----------|------------|------|-------|---|-------|---------------------------------------------------------------|
| 1131150 + | TSS_006299 | 1000 | 5915  | 0 | 4 P   | 29nt upstream of gene PMM1186;                                |
| 1131719 + | TSS_006311 | 1000 | 747   | 0 | 0 I   | within gene(s) PMM1186;                                       |
| 1131989 + | TSS_006317 | 1000 | 113   | 0 | 0 I   | within gene(s) PMM1186;                                       |
| 1133995 + | TSS_006326 | 1000 | 951   | 0 | 5 I   | within gene(s) PMM1188;                                       |
| 1136341 + | TSS_006335 | 1000 | 159   | 0 | 0 P   | 18nt upstream of gene PMM1190;                                |
| 1136852 + | TSS_006340 | 1000 | 201   | 0 | 1 P   | 0nt upstream of gene PMM1191;                                 |
| 1137382 - | TSS_016669 | 1000 | 1203  | 0 | 1 Ai  | antisense to gene(s) PMM1191;                                 |
| 1138412 + | TSS_006439 | 1000 | 457   | 0 | 9 I   | within gene(s) PMM1191;                                       |
| 1138845 - | TSS_016693 | 1000 | 765   | 0 | 1 Ai  | antisense to gene(s) PMM1191;                                 |
| 1139830 + | TSS_006480 | 1000 | 457   | 0 | 0 PAi | 95nt upstream of gene PMM1193; antisense to gene(s) PMM1192;  |
| 1147383 - | TSS_016707 | 1000 | 189   | 0 | 0 I   | within gene(s) PMM1199;                                       |
| 1150601 - | TSS_016714 | 1000 | 100   | 0 | 0 I   | within gene(s) PMM1202;                                       |
| 1152750 - | TSS_016722 | 1000 | 194   | 0 | 0 I   | within gene(s) PMM1204;                                       |
| 1152998 - | TSS_016723 | 1000 | 432   | 0 | 1 IP  | within gene(s) PMM1205; 88nt upstream of gene PMM1204;        |
| 1154177 - | TSS_016730 | 1000 | 159   | 0 | 4 P   | 20nt upstream of gene PMM1205;                                |
| 1157220 + | TSS_006506 | 1000 | 560   | 0 | 0 Ai  | antisense to gene(s) PMM1208;                                 |
| 1158156 - | TSS_016736 | 1000 | 110   | 0 | 0 P   | 14nt upstream of gene PMM1208;                                |
| 1164607 - | TSS_016750 | 1000 | 116   | 0 | 2 Ai  | antisense to gene(s) PMM1215;                                 |
| 1168569 + | TSS_006537 | 1000 | 105   | 0 | 0 P   | 18nt upstream of gene PMM1219;                                |
| 1175722 + | TSS_006543 | 1000 | 103   | 0 | 0 I   | within gene(s) PMM1225;                                       |
| 1181446 - | TSS_016766 | 1000 | 318   | 0 | 2 Ai  | antisense to gene(s) PMM1229;                                 |
| 1183984 + | TSS_006551 | 1000 | 421   | 0 | 6 I   | within gene(s) PMM1232;                                       |
| 1186173 + | TSS_006555 | 1000 | 418   | 0 | 14 I  | within gene(s) PMM1234;                                       |
| 1186359 - | TSS_016777 | 1000 | 369   | 0 | 2 Ai  | antisense to gene(s) PMM1234;                                 |
| 1186823 + | TSS_006563 | 1000 | 4175  | 0 | 2 I   | within gene(s) PMM1234;                                       |
| 1187821 + | TSS_006570 | 1000 | 554   | 0 | 2 IP  | within gene(s) PMM1235; 110nt upstream of gene PMM1236;       |
| 1192406 + | TSS_006581 | 1000 | 667   | 0 | 2 IP  | within gene(s) PMM1239; 15nt upstream of gene PMM1240;        |
| 1201748 - | TSS_016798 | 1000 | 204   | 0 | 0 I   | within gene(s) PMM1249;                                       |
| 1202453 - | TSS_016801 | 1000 | 129   | 0 | 1 I   | within gene(s) PMM1250;                                       |
| 1203802 + | TSS_006595 | 1000 | 276   | 0 | 1 Ai  | antisense to gene(s) PMM1251;                                 |
| 1204621 - | TSS_016812 | 1000 | 308   | 0 | 0 P   | 82nt upstream of gene PMM1251;                                |
| 1206887 + | TSS_006600 | 1000 | 216   | 0 | 0 Ai  | antisense to gene(s) PMM1254;                                 |
| 1209541 - | TSS_016827 | 1000 | 1434  | 0 | 1 I   | within gene(s) PMM1256;                                       |
| 1211786 + | TSS_006609 | 1000 | 190   | 0 | 0 I   | within gene(s) PMM1258;                                       |
| 1212300 - | TSS_016834 | 1000 | 136   | 0 | 0 Ai  | antisense to gene(s) PMM1258;                                 |
| 1212532 + | TSS_006610 | 1000 | 98    | 0 | 0 IP  | within gene(s) PMM1258; 148nt upstream of gene PMM1259;       |
| 1212721 - | TSS_016836 | 1000 | 108   | 0 | 0 Ai  | antisense to gene(s) PMM1258 PMM1259;                         |
| 1213317 + | TSS_006616 | 1000 | 525   | 0 | 4 I   | within gene(s) PMM1259;                                       |
| 1214339 + | TSS_006618 | 1000 | 132   | 0 | 0 I   | within gene(s) PMM1260;                                       |
| 1214724 + | TSS_006620 | 1000 | 862   | 0 | 0 IP  | within gene(s) PMM1260; 140nt upstream of gene PMM1261;       |
| 1214815 + | TSS_006622 | 1000 | 169   | 0 | 0 IP  | within gene(s) PMM1260; 49nt upstream of gene PMM1261;        |
| 1215208 + | TSS_006624 | 1000 | 97    | 0 | 2 I   | within gene(s) PMM1261;                                       |
| 1215731 - | TSS_016842 | 1000 | 107   | 0 | 2 Ai  | antisense to gene(s) PMM1261;                                 |
| 1216927 - | TSS_016852 | 1000 | 8641  | 0 | 0 P   | 26nt upstream of gene PMM1262;                                |
| 1218465 - | TSS_016879 | 1000 | 326   | 0 | 1 I   | within gene(s) PMM1264;                                       |
| 1218623 + | TSS_006654 | 1000 | 1169  | 0 | 1 Ai  | antisense to gene(s) PMM1264;                                 |
| 1219165 - | TSS_016932 | 1000 | 459   | 0 | 12 I  | within gene(s) PMM1264;                                       |
| 1219801 - | TSS_016977 | 1000 | 393   | 0 | 1 P   | 24nt upstream of gene PMM1264;                                |
| 1219908 - | TSS_016979 | 1000 | 327   | 0 | 0 IP  | within gene(s) PMM1265; 131nt upstream of gene PMM1264;       |
| 1220160 + | TSS_006668 | 1000 | 151   | 0 | 5 Ai  | antisense to gene(s) PMM1265;                                 |
| 1221738 - | TSS_016988 | 1000 | 92    | 0 | 3 IP  | within gene(s) PMM1267; 244nt upstream of gene PMM1266;       |
| 1223096 + | TSS_006679 | 1000 | 184   | 0 | 0 Ai  | antisense to gene(s) PMM1269;                                 |
| 1223572 - | TSS_016991 | 1000 | 141   | 0 | 3 I   | within gene(s) PMM1269;                                       |
| 1224017 - | TSS_016998 | 1000 | 6717  | 0 | 10 P  | 16nt upstream of gene PMM1269;                                |
| 1224107 + | TSS_006686 | 1000 | 703   | 0 | 2 Ai  | antisense to gene(s) PMM1270;                                 |
| 1224306 - | TSS_017006 | 1000 | 373   | 0 | 3 I   | within gene(s) PMM1270;                                       |
| 1224483 + | TSS_006689 | 1000 | 1601  | 0 | 1 Ai  | antisense to gene(s) PMM1270;                                 |
| 1225100 - | TSS_017022 | 1000 | 1375  | 0 | 2 P   | 20nt upstream of gene PMM1270;                                |
| 1226399 + | TSS_006697 | 1000 | 2641  | 0 | 2 PAi | 139nt upstream of gene PMM1273; antisense to gene(s) PMM1272; |
| 1226493 - | TSS_017028 | 1000 | 7750  | 0 | 2 P   | 23nt upstream of gene PMM1272;                                |
| 1228410 - | TSS_017034 | 1000 | 124   | 0 | 0 Ai  | antisense to gene(s) PMM1274;                                 |
| 1228824 + | TSS_006706 | 1000 | 1238  | 0 | 3 P   | 13nt upstream of gene PMM1276;                                |
| 1229316 + | TSS_006710 | 1000 | 905   | 0 | 6 Ai  | antisense to gene(s) PMM1278;                                 |
| 1230808 - | TSS_017050 | 1000 | 309   | 0 | 2 I   | within gene(s) PMM1280;                                       |
| 1231722 - | TSS_017056 | 1000 | 527   | 0 | 2 IP  | within gene(s) PMM1281; 194nt upstream of gene PMM1280;       |
| 1233089 + | TSS_006729 | 1000 | 1427  | 0 | 1 Ai  | antisense to gene(s) PMM1283;                                 |
| 1233818 - | TSS_017155 | 1000 | 42426 | 0 | 2 P   | 18nt upstream of gene PMM1283;                                |
| 1235226 - | TSS_017168 | 1000 | 15372 | 0 | 4 P   | 16nt upstream of gene PMM1285;                                |
| 1235758 + | TSS_006768 | 1000 | 145   | 0 | 2 Ai  | antisense to gene(s) PMM1286;                                 |
| 1236777 - | TSS_017199 | 1000 | 7744  | 0 | 7 P   | 16nt upstream of gene PMM1286;                                |
| 1238666 - | TSS_017213 | 1000 | 306   | 0 | 1 I   | within gene(s) PMM1287;                                       |
| 1238943 - | TSS_024014 | 1000 | 1621  | 0 | 2 P   | 24nt upstream of gene PMM1287;                                |
| 1239039 + | TSS_006778 | 1000 | 680   | 0 | 0 P   | 30nt upstream of gene PMM1288;                                |
| 1239358 - | TSS_017216 | 1000 | 238   | 0 | 1 Ai  | antisense to gene(s) PMM1288;                                 |
| 1239949 - | TSS_017222 | 1000 | 405   | 0 | 0 Ai  | antisense to gene(s) PMM1288;                                 |
| 1240190 + | TSS_006812 | 1000 | 1009  | 0 | 1 Ai  | antisense to gene(s) PMM1289;                                 |
| 1240340 + | TSS_006819 | 1000 | 169   | 0 | 2 Ai  | antisense to gene(s) PMM1289;                                 |
| 1240490 - | TSS_017232 | 1000 | 700   | 0 | 0 I   | within gene(s) PMM1289;                                       |
| 1240780 + | TSS_006826 | 1000 | 153   | 0 | 1 Ai  | antisense to gene(s) PMM1289;                                 |
| 1240970 - | TSS_017248 | 1000 | 237   | 0 | 1 I   | within gene(s) PMM1289;                                       |
| 1241067 - | TSS_017252 | 1000 | 10882 | 0 | 2 P   | 18nt upstream of gene PMM1289;                                |



|           |            |      |       |   |      |                                                         |
|-----------|------------|------|-------|---|------|---------------------------------------------------------|
| 1241165 + | TSS_006832 | 1000 | 142   | 0 | 3 Ad | antisense to gene(s) PMM1290 (26nt downstream);         |
| 1241345 + | TSS_006835 | 1000 | 109   | 0 | 0 Ai | antisense to gene(s) PMM1290;                           |
| 1242168 + | TSS_006837 | 1000 | 268   | 0 | 1 Ai | antisense to gene(s) PMM1290;                           |
| 1242445 + | TSS_006839 | 1000 | 1278  | 0 | 2 Ai | antisense to gene(s) PMM1290;                           |
| 1243570 - | TSS_017266 | 1000 | 139   | 0 | 0 Ai | antisense to gene(s) PMM1291;                           |
| 1244009 + | TSS_006851 | 1000 | 229   | 0 | 0 Ai | antisense to gene(s) PMM1292;                           |
| 1245509 + | TSS_006857 | 1000 | 2832  | 0 | 0 P  | 17nt upstream of gene PMM1293;                          |
| 1245700 + | TSS_006865 | 1000 | 770   | 0 | 0 I  | within gene(s) PMM1293;                                 |
| 1245796 + | TSS_006866 | 1000 | 1885  | 0 | 6 I  | within gene(s) PMM1293;                                 |
| 1246156 + | TSS_009993 | 1000 |       | 0 | 0 I  | 17nt upstream of gene PMM1294;                          |
| 1246440 - | TSS_017277 | 1000 | 121   | 0 | 0 Ai | antisense to gene(s) PMM1294;                           |
| 1246482 + | TSS_006885 | 1000 | 120   | 0 | 1 IP | within gene(s) PMM1294; 248nt upstream of gene PMM1295; |
| 1247681 - | TSS_017281 | 1000 | 235   | 0 | 0 P  | 20nt upstream of gene PMM1296;                          |
| 1250130 - | TSS_017302 | 1000 | 2890  | 0 | 6 IP | within gene(s) PMM1299; 75nt upstream of gene PMM1298;  |
| 1250468 - | TSS_017308 | 1000 | 522   | 0 | 5 I  | within gene(s) PMM1299;                                 |
| 1251088 + | TSS_006901 | 1000 | 225   | 0 | 0 P  | 15nt upstream of gene PMM1300;                          |
| 1252018 + | TSS_006904 | 1000 | 109   | 0 | 0 I  | within gene(s) PMM1300;                                 |
| 1252148 + | TSS_006906 | 1000 | 187   | 0 | 2 I  | within gene(s) PMM1300;                                 |
| 1252727 - | TSS_017313 | 1000 | 489   | 0 | 0 O  | -                                                       |
| 1252970 + | TSS_006914 | 1000 | 1431  | 0 | 6 P  | 32nt upstream of gene PMM1301;                          |
| 1253102 + | TSS_006915 | 1000 | 190   | 0 | 0 I  | within gene(s) PMM1301;                                 |
| 1256224 + | TSS_006926 | 1000 | 137   | 0 | 3 Ai | antisense to gene(s) PMM1303;                           |
| 1258142 - | TSS_017321 | 1000 | 224   | 0 | 12 P | 16nt upstream of gene PMM1304;                          |
| 1258258 + | TSS_006932 | 1000 | 758   | 0 | 6 P  | 15nt upstream of gene PMM1305;                          |
| 1260324 + | TSS_006942 | 1000 | 91    | 0 | 3 I  | within gene(s) PMM1306;                                 |
| 1260859 + | TSS_010105 | 1000 |       | 0 | 0 IP | within gene(s) PMM1306; 33nt upstream of gene PMM1307;  |
| 1261120 + | TSS_006947 | 1000 | 162   | 0 | 0 IP | within gene(s) PMM1307; 179nt upstream of gene PMM1308; |
| 1262176 + | TSS_006950 | 1000 | 848   | 0 | 2 P  | 26nt upstream of gene PMM1309;                          |
| 1263425 - | TSS_017349 | 1000 | 514   | 0 | 0 O  | -                                                       |
| 1263674 + | TSS_006980 | 1000 | 716   | 0 | 1 I  | within gene(s) PMM1310;                                 |
| 1264789 - | TSS_017352 | 1000 | 106   | 0 | 0 I  | within gene(s) PMM1311;                                 |
| 1264868 + | TSS_006988 | 1000 | 223   | 0 | 4 Ai | antisense to gene(s) PMM1311;                           |
| 1265561 + | TSS_006991 | 1000 | 15215 | 0 | 4 I  | within gene(s) PMM1312;                                 |
| 1266213 - | TSS_017356 | 1000 | 134   | 0 | 1 Ai | antisense to gene(s) PMM1312;                           |
| 1266690 + | TSS_007010 | 1000 | 11753 | 0 | 2 P  | 20nt upstream of gene PMM1313;                          |
| 1268104 + | TSS_007076 | 1000 | 3876  | 0 | 2 P  | 24nt upstream of gene PMM1315;                          |
| 1270161 + | TSS_007111 | 1000 | 357   | 0 | 7 P  | 15nt upstream of gene PMM1317;                          |
| 1270931 - | TSS_017384 | 1000 | 169   | 0 | 8 I  | within gene(s) PMM1318;                                 |
| 1272067 - | TSS_017393 | 1000 | 97779 | 0 | 8 P  | 65nt upstream of gene PMM1321;                          |
| 1273518 - | TSS_017400 | 1000 | 1726  | 0 | 3 Ai | antisense to gene(s) PMM1322;                           |
| 1273698 + | TSS_007125 | 1000 | 153   | 0 | 0 I  | within gene(s) PMM1322;                                 |
| 1274764 + | TSS_007134 | 1000 | 943   | 0 | 1 P  | 86nt upstream of gene PMM1323;                          |
| 1275301 - | TSS_017407 | 1000 | 113   | 0 | 0 Ai | antisense to gene(s) PMM1323;                           |
| 1275591 + | TSS_007141 | 1000 | 145   | 0 | 0 I  | within gene(s) PMM1323;                                 |
| 1276011 - | TSS_017409 | 1000 | 598   | 0 | 2 Ai | antisense to gene(s) PMM1323;                           |
| 1276210 + | TSS_007144 | 1000 | 234   | 0 | 0 I  | within gene(s) PMM1324;                                 |
| 1276620 - | TSS_017414 | 1000 | 241   | 0 | 0 Ai | antisense to gene(s) PMM1324;                           |
| 1276641 + | TSS_007147 | 1000 | 402   | 0 | 0 I  | within gene(s) PMM1324;                                 |
| 1278318 + | TSS_007153 | 1000 | 390   | 0 | 0 IP | within gene(s) PMM1326; 106nt upstream of gene PMM1327; |
| 1281106 - | TSS_017423 | 1000 | 297   | 0 | 0 IP | within gene(s) PMM1330; 132nt upstream of gene PMM1329; |
| 1281349 - | TSS_017426 | 1000 | 167   | 0 | 0 P  | 30nt upstream of gene PMM1330;                          |
| 1282915 + | TSS_007173 | 1000 | 144   | 0 | 1 I  | within gene(s) PMM1332;                                 |
| 1284193 - | TSS_017436 | 1000 | 164   | 0 | 0 I  | within gene(s) PMM1333;                                 |
| 1284754 + | TSS_007180 | 1000 | 141   | 0 | 1 Ai | antisense to gene(s) PMM1334;                           |
| 1285667 - | TSS_017439 | 1000 | 173   | 0 | 3 I  | within gene(s) PMM1335;                                 |
| 1286762 + | TSS_007193 | 1000 | 362   | 0 | 5 Ai | antisense to gene(s) PMM1337;                           |
| 1286829 - | TSS_017449 | 1000 | 174   | 0 | 2 IP | within gene(s) PMM1337; 150nt upstream of gene PMM1336; |
| 1287550 - | TSS_017452 | 1000 | 178   | 0 | 0 IP | within gene(s) PMM1338; 17nt upstream of gene PMM1337;  |
| 1287887 - | TSS_017460 | 1000 | 269   | 0 | 9 I  | within gene(s) PMM1338;                                 |
| 1287977 - | TSS_017462 | 1000 | 170   | 0 | 2 I  | within gene(s) PMM1338;                                 |
| 1288162 + | TSS_007201 | 1000 | 140   | 0 | 6 Ai | antisense to gene(s) PMM1338;                           |
| 1288975 - | TSS_017473 | 1000 | 243   | 0 | 0 I  | within gene(s) PMM1338;                                 |
| 1289984 - | TSS_017481 | 1000 | 151   | 0 | 2 I  | within gene(s) PMM1339;                                 |
| 1290416 - | TSS_017484 | 1000 | 96    | 0 | 2 I  | within gene(s) PMM1339;                                 |
| 1290486 + | TSS_007208 | 1000 | 88    | 0 | 0 P  | 90nt upstream of gene PMM1340;                          |
| 1291245 - | TSS_017488 | 1000 | 139   | 0 | 0 Ai | antisense to gene(s) PMM1340;                           |
| 1291318 - | TSS_017489 | 1000 | 248   | 0 | 0 Ai | antisense to gene(s) PMM1340;                           |
| 1291478 + | TSS_007213 | 1000 | 1722  | 0 | 2 I  | within gene(s) PMM1340;                                 |
| 1291709 - | TSS_017490 | 1000 | 119   | 0 | 0 Ai | antisense to gene(s) PMM1340;                           |
| 1292169 - | TSS_017493 | 1000 | 153   | 0 | 2 Ai | antisense to gene(s) PMM1341;                           |
| 1293363 + | TSS_007228 | 1000 | 104   | 0 | 0 I  | within gene(s) PMM1341;                                 |
| 1293438 + | TSS_007231 | 1000 | 330   | 0 | 0 I  | within gene(s) PMM1341;                                 |
| 1293828 + | TSS_007234 | 1000 | 209   | 0 | 2 I  | within gene(s) PMM1341;                                 |
| 1295522 - | TSS_017510 | 1000 | 120   | 0 | 0 P  | 13nt upstream of gene PMM1342;                          |
| 1295943 - | TSS_017513 | 1000 | 121   | 0 | 0 P  | 48nt upstream of gene PMM1343;                          |
| 1296395 + | TSS_007250 | 1000 | 9025  | 0 | 7 IP | within gene(s) PMM1344; 96nt upstream of gene PMM1345;  |
| 1297508 - | TSS_017522 | 1000 | 444   | 0 | 6 P  | 89nt upstream of gene PMM1346;                          |
| 1299151 + | TSS_007262 | 1000 | 408   | 0 | 0 Ai | antisense to gene(s) PMM1348;                           |
| 1299756 + | TSS_007264 | 1000 | 160   | 0 | 2 P  | 9nt upstream of gene PMM1349;                           |
| 1300005 + | TSS_007266 | 1000 | 175   | 0 | 5 I  | within gene(s) PMM1349;                                 |
| 1300564 - | TSS_017530 | 1000 | 127   | 0 | 0 Ai | antisense to gene(s) PMM1349;                           |

|           |            |      |       |     |                                |                                                         |
|-----------|------------|------|-------|-----|--------------------------------|---------------------------------------------------------|
| 1300764 + | TSS_007274 | 1000 | 12468 | 0   | 2 I                            | within gene(s) PMM1350;                                 |
| 1302130 - | TSS_017551 | 1000 | 18291 | 0   | 2 P                            | 33nt upstream of gene PMM1352;                          |
| 1302279 - | TSS_017555 | 1000 | 215   | 0   | 4 IP                           | within gene(s) PMM1353; 182nt upstream of gene PMM1352; |
| 1304163 + | TSS_007316 | 1000 | 741   | 0   | 0 Ai                           | antisense to gene(s) PMM1354;                           |
| 1304765 - | TSS_017575 | 1000 | 1212  | 0   | 4 P                            | 19nt upstream of gene PMM1354;                          |
| 1307622 + | TSS_007327 | 1000 | 556   | 0   | 0 O                            | -                                                       |
| 1309146 - | TSS_017584 | 1000 | 124   | 0   | 0 I                            | within gene(s) PMM1360;                                 |
| 1309784 + | TSS_007330 | 1000 | 127   | 0   | 2 P                            | 56nt upstream of gene PMM1361;                          |
| 1313108 + | TSS_007340 | 1000 | 1165  | 0   | 3 P                            | 16nt upstream of gene PMM1365;                          |
| 1315509 - | TSS_017597 | 1000 | 1479  | 0   | 7 P                            | 15nt upstream of gene PMM1368;                          |
| 1316344 - | TSS_017609 | 1000 | 926   | 0   | 5 P                            | 10nt upstream of gene PMM1369;                          |
| 1317860 + | TSS_007358 | 1000 | 97    | 0   | 0 O                            | -                                                       |
| 1318282 - | TSS_017617 | 1000 | 111   | 0   | 0 O                            | -                                                       |
| 1319591 + | TSS_007363 | 1000 | 6092  | 0   | 2 O                            | -                                                       |
| 1319966 + | TSS_007369 | 1000 | 589   | 0   | 2 P                            | 13nt upstream of gene PMM1372;                          |
| 1321010 + | TSS_007374 | 1000 | 5699  | 0   | 2 O                            | -                                                       |
| 1322462 - | TSS_017626 | 1000 | 627   | 0   | 0 O                            | -                                                       |
| 1322954 - | TSS_017628 | 1000 | 263   | 0   | 0 P                            | 15nt upstream of gene PMM1374;                          |
| 1324248 + | TSS_007385 | 1000 | 665   | 0   | 0 P                            | 19nt upstream of gene PMM1377;                          |
| 1326668 - | TSS_017637 | 1000 | 15177 | 0   | 2 O                            | -                                                       |
| 1328576 + | TSS_007394 | 1000 | 106   | 0   | 0 O                            | -                                                       |
| 1328956 - | TSS_017642 | 1000 | 8070  | 0   | 2 O                            | -                                                       |
| 1329106 + | TSS_007397 | 1000 | 569   | 0   | 3 O                            | -                                                       |
| 1332432 + | TSS_007407 | 1000 | 3521  | 0   | 2 O                            | -                                                       |
| 1332606 - | TSS_017652 | 1000 | 183   | 0   | 4 O                            | -                                                       |
| 1332932 - | TSS_017653 | 1000 | 97    | 0   | 0 I                            | within gene(s) PMM1383;                                 |
| 1333562 - | TSS_017656 | 1000 | 128   | 0   | 1 P                            | 188nt upstream of gene PMM1383;                         |
| 1334143 + | TSS_007412 | 1000 | 201   | 0   | 0 O                            | -                                                       |
| 1334592 + | TSS_007415 | 1000 | 0     | 5 P | 21nt upstream of gene PMM1384; |                                                         |
| 1335359 + | TSS_007426 | 1000 | 26107 | 0   | 2 O                            | -                                                       |
| 1336436 + | TSS_007433 | 1000 | 469   | 0   | 0 O                            | -                                                       |
| 1338319 - | TSS_017666 | 1000 | 241   | 0   | 5 Ai                           | antisense to gene(s) PMM1386;                           |
| 1338981 + | TSS_007441 | 1000 | 197   | 0   | 2 P                            | 17nt upstream of gene PMM1387;                          |
| 1339834 - | TSS_017670 | 1000 | 333   | 0   | 0 P                            | 32nt upstream of gene PMM1388;                          |
| 1341449 + | TSS_007446 | 1000 | 135   | 0   | 0 P                            | 15nt upstream of gene PMM1391;                          |
| 1343374 + | TSS_007449 | 1000 | 149   | 0   | 0 I                            | within gene(s) PMM1394;                                 |
| 1343856 - | TSS_017680 | 1000 | 4699  | 0   | 8 O                            | -                                                       |
| 1344022 - | TSS_017683 | 1000 | 152   | 0   | 2 O                            | -                                                       |
| 1345690 - | TSS_024748 | 1000 | 5034  | 0   | 5 P                            | 16nt upstream of gene PMM1399;                          |
| 1346497 - | TSS_017730 | 1000 | 388   | 0   | 0 I                            | within gene(s) PMM1400;                                 |
| 1346865 - | TSS_024786 | 1000 | 78431 | 0   | 3 P                            | 239nt upstream of gene PMM1400;                         |
| 1346985 + | TSS_007461 | 1000 | 2513  | 0   | 0 P                            | 146nt upstream of gene PMM1401;                         |
| 1347115 + | TSS_010871 | 1000 | 2891  | 0   | 2 P                            | 16nt upstream of gene PMM1401;                          |
| 1347808 + | TSS_007465 | 1000 | 223   | 0   | 2 P                            | 21nt upstream of gene PMM1402;                          |
| 1350386 - | TSS_017753 | 1000 | 7268  | 0   | 5 P                            | 18nt upstream of gene PMM1404;                          |
| 1351013 - | TSS_017759 | 1000 | 614   | 0   | 4 P                            | 26nt upstream of gene PMM1405;                          |
| 1352055 - | TSS_017763 | 1000 | 485   | 0   | 0 P                            | 24nt upstream of gene PMM1408;                          |
| 1352429 - | TSS_017766 | 1000 | 793   | 0   | 2 P                            | 18nt upstream of gene PMM1409;                          |
| 1353625 - | TSS_017772 | 1000 | 267   | 0   | 6 O                            | -                                                       |
| 1353716 - | TSS_024834 | 1000 | 1367  | 0   | 1 O                            | -                                                       |
| 1354656 + | TSS_007483 | 1000 | 812   | 0   | 1 P                            | 26nt upstream of gene PMM1412;                          |
| 1355165 + | TSS_007492 | 1000 | 1062  | 0   | 2 P                            | 17nt upstream of gene PMM1413;                          |
| 1355765 + | TSS_007495 | 1000 | 142   | 0   | 2 IP                           | within gene(s) PMM1414; 230nt upstream of gene PMM1415; |
| 1356437 - | TSS_017783 | 1000 | 331   | 0   | 0 Ai                           | antisense to gene(s) PMM1415;                           |
| 1356695 + | TSS_007499 | 1000 | 93    | 0   | 0 I                            | within gene(s) PMM1415;                                 |
| 1357783 + | TSS_007505 | 1000 | 132   | 0   | 0 I                            | within gene(s) PMM1416;                                 |
| 1358056 + | TSS_007507 | 1000 | 136   | 0   | 2 I                            | within gene(s) PMM1416;                                 |
| 1358652 + | TSS_007515 | 1000 | 929   | 0   | 0 I                            | within gene(s) PMM1416;                                 |
| 1358898 - | TSS_017795 | 1000 | 425   | 0   | 0 Ai                           | antisense to gene(s) PMM1416;                           |
| 1359810 - | TSS_017801 | 1000 | 384   | 0   | 6 Ai                           | antisense to gene(s) PMM1416;                           |
| 1359899 - | TSS_017809 | 1000 | 217   | 0   | 7 O                            | -                                                       |
| 1360185 - | TSS_017814 | 1000 | 23873 | 0   | 3 O                            | -                                                       |
| 1362875 + | TSS_007533 | 1000 | 252   | 0   | 0 Ai                           | antisense to gene(s) PMM1421 PMM1422;                   |
| 1363264 - | TSS_017821 | 1000 | 262   | 0   | 7 I                            | within gene(s) PMM1422;                                 |
| 1363417 - | TSS_017822 | 1000 | 270   | 0   | 0 P                            | 27nt upstream of gene PMM1422;                          |
| 1364352 - | TSS_017830 | 1000 | 3808  | 0   | 1 P                            | 202nt upstream of gene PMM1424;                         |
| 1364483 + | TSS_007537 | 1000 | 222   | 0   | 0 O                            | -                                                       |
| 1365171 + | TSS_007540 | 1000 | 126   | 0   | 4 P                            | 15nt upstream of gene PMM1425;                          |
| 1366150 - | TSS_017834 | 1000 | 278   | 0   | 2 Ai                           | antisense to gene(s) PMM1425;                           |
| 1366222 - | TSS_017836 | 1000 | 250   | 0   | 0 Ai                           | antisense to gene(s) PMM1425;                           |
| 1367108 + | TSS_011000 | 1000 | 0     | 0 P | 18nt upstream of gene PMM1427; |                                                         |
| 1367587 + | TSS_007545 | 1000 | 290   | 0   | 2 P                            | 92nt upstream of gene PMM1428;                          |
| 1369350 - | TSS_017841 | 1000 | 139   | 0   | 0 P                            | 19nt upstream of gene PMM1431;                          |
| 1369959 + | TSS_007554 | 1000 | 151   | 0   | 1 I                            | within gene(s) PMM1432;                                 |
| 1371646 + | TSS_007561 | 1000 | 797   | 0   | 4 P                            | 31nt upstream of gene PMM1434;                          |
| 1372149 - | TSS_017853 | 1000 | 1481  | 0   | 1 Ai                           | antisense to gene(s) PMM1434;                           |
| 1372986 + | TSS_007570 | 1000 | 131   | 0   | 0 I                            | within gene(s) PMM1434;                                 |
| 1373308 + | TSS_007573 | 1000 | 2240  | 0   | 4 P                            | 17nt upstream of gene PMM1435;                          |
| 1373532 + | TSS_007576 | 1000 | 457   | 0   | 1 I                            | within gene(s) PMM1435;                                 |
| 1373679 + | TSS_007579 | 1000 | 1293  | 0   | 0 Ai                           | antisense to gene(s) PMM1436;                           |
| 1374806 - | TSS_018016 | 1000 | 1734  | 0   | 18 I                           | within gene(s) PMM1436;                                 |

|           |            |      |       |   |       |                                                               |
|-----------|------------|------|-------|---|-------|---------------------------------------------------------------|
| 1374887 + | TSS_007611 | 1000 | 312   | 0 | 0 Ai  | antisense to gene(s) PMM1436;                                 |
| 1375257 + | TSS_007617 | 1000 | 2944  | 0 | 1 Ai  | antisense to gene(s) PMM1436;                                 |
| 1375708 - | TSS_025122 | 1000 |       | 0 | 4 P   | 71nt upstream of gene PMM1437;                                |
| 1375811 + | TSS_007625 | 1000 | 1176  | 0 | 1 P   | 21nt upstream of gene PMM1438;                                |
| 1377943 + | TSS_007718 | 1000 | 171   | 0 | 1 Ai  | antisense to gene(s) PMM1440;                                 |
| 1378269 - | TSS_025142 | 1000 | 12461 | 0 | 3 P   | 18nt upstream of gene PMM1440;                                |
| 1378535 - | TSS_018171 | 1000 | 155   | 0 | 0 P   | 17nt upstream of gene PMM1441;                                |
| 1378674 + | TSS_007728 | 1000 | 390   | 0 | 2 Ai  | antisense to gene(s) PMM1442;                                 |
| 1379477 + | TSS_007734 | 1000 | 8941  | 0 | 9 Ai  | antisense to gene(s) PMM1442;                                 |
| 1379556 + | TSS_007737 | 1000 | 852   | 0 | 0 Ai  | antisense to gene(s) PMM1442;                                 |
| 1379949 + | TSS_007739 | 1000 | 135   | 0 | 0 P   | 27nt upstream of gene PMM1443;                                |
| 1380019 + | TSS_007743 | 1000 | 377   | 0 | 6 I   | within gene(s) PMM1443;                                       |
| 1380876 + | TSS_007754 | 1000 | 2604  | 0 | 2 IP  | within gene(s) PMM1443; 80nt upstream of gene PMM1444;        |
| 1382749 + | TSS_007760 | 1000 | 148   | 0 | 0 IP  | within gene(s) PMM1445; 31nt upstream of gene PMM1446;        |
| 1385792 + | TSS_007769 | 1000 | 751   | 0 | 3 Ai  | antisense to gene(s) PMM1449;                                 |
| 1386095 + | TSS_007773 | 1000 | 242   | 0 | 1 Ai  | antisense to gene(s) PMM1450;                                 |
| 1386700 + | TSS_007780 | 1000 | 433   | 0 | 0 Ai  | antisense to gene(s) PMM1450;                                 |
| 1387132 - | TSS_018258 | 1000 | 114   | 0 | 6 IP  | within gene(s) PMM1451; 89nt upstream of gene PMM1450;        |
| 1388669 - | TSS_018386 | 1000 | 4453  | 0 | 8 IP  | within gene(s) PMM1452; 88nt upstream of gene PMM1451;        |
| 1388825 - | TSS_018394 | 1000 | 319   | 0 | 1 IP  | within gene(s) PMM1452; 244nt upstream of gene PMM1451;       |
| 1389346 - | TSS_018403 | 1000 | 875   | 0 | 6 IP  | within gene(s) PMM1453; 191nt upstream of gene PMM1452;       |
| 1390543 - | TSS_018403 | 1000 |       | 0 | 0 P   | 104nt upstream of gene PMM1455;                               |
| 1391446 - | TSS_018450 | 1000 | 163   | 0 | 2 IP  | within gene(s) PMM1457; 115nt upstream of gene PMM1456;       |
| 1391900 - | TSS_018457 | 1000 | 351   | 0 | 1 P   | 44nt upstream of gene PMM1457;                                |
| 1392904 - | TSS_018459 | 1000 | 157   | 0 | 4 Ai  | antisense to gene(s) PMM1458;                                 |
| 1393119 + | TSS_007826 | 1000 | 100   | 0 | 0 I   | within gene(s) PMM1458;                                       |
| 1393186 + | TSS_007827 | 1000 | 573   | 0 | 0 I   | within gene(s) PMM1458;                                       |
| 1393368 + | TSS_007830 | 1000 | 1989  | 0 | 2 P   | 69nt upstream of gene PMM1459;                                |
| 1395953 + | TSS_007839 | 1000 | 1515  | 0 | 5 P   | 14nt upstream of gene PMM1462;                                |
| 1396223 + | TSS_007842 | 1000 | 3623  | 0 | 4 P   | 14nt upstream of gene PMM1463;                                |
| 1397666 + | TSS_007854 | 1000 | 2038  | 0 | 4 P   | 16nt upstream of gene PMM1465;                                |
| 1398965 + | TSS_007876 | 1000 | 117   | 0 | 1 IP  | within gene(s) PMM1465; 53nt upstream of gene PMM1466;        |
| 1401712 - | TSS_018480 | 1000 | 157   | 0 | 0 I   | within gene(s) PMM1467;                                       |
| 1403187 - | TSS_018487 | 1000 | 1106  | 0 | 1 P   | 46nt upstream of gene PMM1467;                                |
| 1410558 + | TSS_007896 | 1000 | 135   | 0 | 0 Ai  | antisense to gene(s) PMM1476;                                 |
| 1411576 - | TSS_018507 | 1000 | 6619  | 0 | 3 P   | 17nt upstream of gene PMM1479;                                |
| 1412048 + | TSS_007901 | 1000 | 274   | 0 | 0 Ai  | antisense to gene(s) PMM1480;                                 |
| 1412609 - | TSS_018513 | 1000 | 633   | 0 | 5 P   | 161nt upstream of gene PMM1480;                               |
| 1413912 + | TSS_007904 | 1000 | 445   | 0 | 0 O   | -                                                             |
| 1414968 - | TSS_018571 | 1000 | 556   | 0 | 10 I  | within gene(s) PMM1483;                                       |
| 1416430 + | TSS_007945 | 1000 | 530   | 0 | 6 Ai  | antisense to gene(s) PMM1483;                                 |
| 1416999 - | TSS_018730 | 1000 | 2145  | 0 | 5 I   | within gene(s) PMM1483;                                       |
| 1417887 - | TSS_018792 | 1000 | 240   | 0 | 7 I   | within gene(s) PMM1483;                                       |
| 1418150 + | TSS_007967 | 1000 | 1660  | 0 | 1 Ai  | antisense to gene(s) PMM1484;                                 |
| 1418507 + | TSS_007976 | 1000 | 2063  | 0 | 1 Ai  | antisense to gene(s) PMM1484;                                 |
| 1419267 - | TSS_018869 | 1000 | 658   | 0 | 5 I   | within gene(s) PMM1484;                                       |
| 1419883 + | TSS_008002 | 1000 | 407   | 0 | 1 Ai  | antisense to gene(s) PMM1484;                                 |
| 1420518 + | TSS_008005 | 1000 | 403   | 0 | 2 Ai  | antisense to gene(s) PMM1485;                                 |
| 1422142 + | TSS_008029 | 1000 | 311   | 0 | 0 Ai  | antisense to gene(s) PMM1485;                                 |
| 1422752 - | TSS_019004 | 1000 | 212   | 0 | 0 I   | within gene(s) PMM1485;                                       |
| 1422856 - | TSS_019005 | 1000 | 314   | 0 | 0 I   | within gene(s) PMM1485;                                       |
| 1423046 - | TSS_019006 | 1000 | 169   | 0 | 1 I   | within gene(s) PMM1485;                                       |
| 1423524 - | TSS_019012 | 1000 | 717   | 0 | 5 P   | 211nt upstream of gene PMM1485;                               |
| 1423961 + | TSS_008036 | 1000 | 252   | 0 | 0 Ai  | antisense to gene(s) PMM1486;                                 |
| 1424666 - | TSS_019021 | 1000 | 359   | 0 | 6 P   | 20nt upstream of gene PMM1487;                                |
| 1426785 - | TSS_019038 | 1000 | 619   | 0 | 3 P   | 38nt upstream of gene PMM1489;                                |
| 1427278 + | TSS_008046 | 1000 | 271   | 0 | 2 Ai  | antisense to gene(s) PMM1490;                                 |
| 1428507 + | TSS_008050 | 1000 | 754   | 0 | 0 IP  | within gene(s) PMM1491; 98nt upstream of gene PMM1492;        |
| 1428986 + | TSS_008060 | 1000 | 161   | 0 | 0 I   | within gene(s) PMM1492;                                       |
| 1429590 + | TSS_008075 | 1000 | 443   | 0 | 8 I   | within gene(s) PMM1492;                                       |
| 1431142 + | TSS_008104 | 1000 | 715   | 0 | 7 I   | within gene(s) PMM1494;                                       |
| 1431241 + | TSS_008110 | 1000 | 320   | 0 | 6 I   | within gene(s) PMM1494;                                       |
| 1433023 + | TSS_008171 | 1000 | 1021  | 0 | 3 I   | within gene(s) PMM1494;                                       |
| 1433296 + | TSS_008177 | 1000 | 358   | 0 | 0 I   | within gene(s) PMM1494;                                       |
| 1435445 + | TSS_008191 | 1000 | 306   | 0 | 0 I   | within gene(s) PMM1496;                                       |
| 1436999 + | TSS_008197 | 1000 | 2155  | 0 | 1 P   | 24nt upstream of gene PMM1498;                                |
| 1437356 - | TSS_019089 | 1000 | 677   | 0 | 1 Ai  | antisense to gene(s) PMM1498;                                 |
| 1439023 - | TSS_019098 | 1000 | 929   | 0 | 0 I   | within gene(s) PMM1499;                                       |
| 1439399 + | TSS_008223 | 1000 | 177   | 0 | 0 Ai  | antisense to gene(s) PMM1500;                                 |
| 1440282 - | TSS_019119 | 1000 | 1141  | 0 | 1 P   | 23nt upstream of gene PMM1500;                                |
| 1440561 + | TSS_008230 | 1000 | 218   | 0 | 0 I   | within gene(s) PMM1501;                                       |
| 1441843 + | TSS_011722 | 1000 | 9587  | 0 | 3 I   | within gene(s) PMM1501;                                       |
| 1443305 + | TSS_008235 | 1000 | 1503  | 0 | 2 PAi | 201nt upstream of gene PMM1504; antisense to gene(s) PMM1503; |
| 1443593 - | TSS_019128 | 1000 | 784   | 0 | 1 PAi | 140nt upstream of gene PMM1503; antisense to gene(s) PMM1504; |
| 1444017 - | TSS_019131 | 1000 | 140   | 0 | 2 Ai  | antisense to gene(s) PMM1504;                                 |
| 1446380 - | TSS_019144 | 1000 | 4070  | 0 | 7 P   | 60nt upstream of gene PMM1507;                                |
| 1447058 + | TSS_008266 | 1000 | 1623  | 0 | 1 Ai  | antisense to gene(s) PMM1508;                                 |
| 1447086 - | TSS_019202 | 1000 | 1842  | 0 | 0 I   | within gene(s) PMM1508;                                       |
| 1447634 + | TSS_008277 | 1000 | 535   | 0 | 1 O   | -                                                             |
| 1448025 - | TSS_019253 | 1000 | 33651 | 0 | 6 I   | within gene(s) PMM1509;                                       |
| 1449812 - | TSS_026256 | 1000 | 3354  | 0 | 5 P   | 64nt upstream of gene PMM1509;                                |

|           |            |      |        |           |       |                                                                         |
|-----------|------------|------|--------|-----------|-------|-------------------------------------------------------------------------|
| 1450427 - | TSS_019360 | 1000 | 1755   | 0         | 9 IP  | within gene(s) PMM1511; 104nt upstream of gene PMM1510;                 |
| 1450752 - | TSS_026278 | 1000 | 2146   | 0         | 5 P   | 25nt upstream of gene PMM1511;                                          |
| 1450891 + | TSS_011781 | 1000 | 261    | 0         | 5 P   | 31nt upstream of gene PMM1512;                                          |
| 1452589 - | TSS_019376 | 1000 | 128    | 0         | 1 Ai  | antisense to gene(s) PMM1512;                                           |
| 1454166 + | TSS_008330 | 1000 | 143    | 0         | 2 I   | within gene(s) PMM1512;                                                 |
| 1454543 + | TSS_008337 | 1000 | 318    | 0         | 3 I   | within gene(s) PMM1512;                                                 |
| 1454745 + | TSS_008339 | 1000 | 126    | 0         | 1 I   | within gene(s) PMM1512;                                                 |
| 1456713 - | TSS_019390 | 1000 | 2980   | 0         | 4 P   | 20nt upstream of gene PMM1514;                                          |
| 1459395 - | TSS_019394 | 1000 | 117    | 0         | 0 Ai  | antisense to gene(s) PMM1518;                                           |
| 1460363 - | TSS_019411 | 1000 | 14043  | 0         | 3 P   | 15nt upstream of gene PMM1520;                                          |
| 1462291 - | TSS_019457 | 1000 | 5199   | 0         | 13 I  | within gene(s) PMM1523;                                                 |
| 1462416 - | TSS_019467 | 1000 | 5017   | 0         | 36 I  | within gene(s) PMM1523;                                                 |
| 1464275 - | TSS_019709 | 1000 | 5123   | 0         | 10 IP | within gene(s) PMM1524; 142nt upstream of gene PMM1523;                 |
| 1464704 - | TSS_019746 | 1000 | 3643   | 0         | 18 I  | within gene(s) PMM1524;                                                 |
| 1465661 - | TSS_019863 | 1000 | 5893   | 0         | 33 I  | within gene(s) PMM1524;                                                 |
| 1466574 - | TSS_026889 | 1000 | 158379 | 0         | 2 P   | 109nt upstream of gene PMM1524;                                         |
| 1468533 - | TSS_019956 | 1000 | 284    | 0         | 0 Ai  | antisense to gene(s) PMM1525;                                           |
| 1468704 + | TSS_008460 | 1000 | 90     | 0         | 7 P   | 21nt upstream of gene PMM1526;                                          |
| 1469172 + | TSS_008462 | 1000 | 140    | 0         | 0 I   | within gene(s) PMM1526;                                                 |
| 1469928 - | TSS_019961 | 1000 | 144    | 0         | 0 I   | within gene(s) PMM1527;                                                 |
| 1470923 - | TSS_019964 | 1000 | 158    | 0         | 0 P   | 35nt upstream of gene PMM1527;                                          |
| 1470954 + | TSS_008468 | 1000 | 541    | 0         | 2 P   | 15nt upstream of gene PMM1528;                                          |
| 1471756 + | TSS_008472 | 1000 | 251    | 0         | 0 Ai  | antisense to gene(s) PMM1529;                                           |
| 1473037 - | TSS_019982 | 1000 | 471    | 0         | 7 IP  | within gene(s) PMM1531; 166nt upstream of gene PMM1530;                 |
| 1473409 - | TSS_019991 | 1000 | 298    | 0         | 6 IP  | within gene(s) PMM1532; 114nt upstream of gene PMM1531;                 |
| 1473764 - | TSS_026938 | 1000 | 4813   | 0         | 4 P   | 28nt upstream of gene PMM1532;                                          |
| 1474126 - | TSS_020011 | 1000 | 206    | 0         | 0 I   | within gene(s) PMM1533;                                                 |
| 1474906 - | TSS_020017 | 1000 | 333    | 0         | 4 IP  | within gene(s) PMM1534; 247nt upstream of gene PMM1533;                 |
| 1475305 - | TSS_020030 | 1000 | 953    | 0         | 0 I   | within gene(s) PMM1535;                                                 |
| 1475507 - | TSS_020036 | 1000 | 263    | 0         | 0 I   | within gene(s) PMM1535;                                                 |
| 1476176 - | TSS_020052 | 1000 | 242    | 0         | 18 IP | within gene(s) PMM1536; 175nt upstream of gene PMM1535;                 |
| 1476326 - | TSS_020063 | 1000 | 264    | 0         | 19 I  | within gene(s) PMM1536;                                                 |
| 1477037 - | TSS_027000 | 1000 | 65911  | 0         | 2 P   | 21nt upstream of gene PMM1538;                                          |
| 1478505 - | TSS_020121 | 1000 | 362    | 0         | 0 I   | within gene(s) PMM1540;                                                 |
| 1478791 + | TSS_008510 | 1000 | 169    | 0         | 0 Ai  | antisense to gene(s) PMM1540;                                           |
| 1479684 + | TSS_008519 | 1000 | 894    | 0         | 0 Ai  | antisense to gene(s) PMM1542;                                           |
| 1480030 - | TSS_020176 | 1000 | 93     | 0         | 0 I   | within gene(s) PMM1542;                                                 |
| 1480604 - | TSS_020214 | 1000 | 13713  | 0         | 12 IP | within gene(s) PMM1544; 178nt upstream of gene PMM1543;                 |
| 1482034 - | TSS_020312 | 1000 | 536    | 0         | 1 IP  | within gene(s) PMM1547; 93nt upstream of gene PMM1546;                  |
| 1483975 + | TSS_008614 | 1000 | 924    | 0         | 1 Ai  | antisense to gene(s) PMM1552;                                           |
| 1484971 - | TSS_020521 | 1000 | 974    | 0         | 10 IP | within gene(s) PMM1554; 134nt upstream of gene PMM1553;                 |
| 1485370 - | TSS_020549 | 1000 | 2010   | 0         | 0 I   | within gene(s) PMM1555;                                                 |
| 1486430 - | TSS_020640 | 1000 | 988    | 0         | 7 IP  | within gene(s) PMM1557; 94nt upstream of gene PMM1556;                  |
| 1487844 - | TSS_027287 | 1000 | 2273   | 0         | 1 P   | 229nt upstream of gene PMM1558;                                         |
| 1487895 + | TSS_008689 | 1000 | 783    | 0         | 1 P   | 13nt upstream of gene PMM1559;                                          |
| 1489480 + | TSS_008697 | 1000 | 400    | 0         | 6 P   | 92nt upstream of gene PMM1561;                                          |
| 1490373 + | TSS_012048 | 1000 | 1656   | 0         | 2 P   | 85nt upstream of gene PMM1562;                                          |
| 1490650 + | TSS_008712 | 1000 | 550    | 0         | 10 I  | within gene(s) PMM1562;                                                 |
| 1490789 - | TSS_020725 | 1000 | 278    | 0         | 2 Ai  | antisense to gene(s) PMM1562;                                           |
| 1491832 - | TSS_020737 | 1000 | 194    | 0         | 1 P   | 14nt upstream of gene PMM1563;                                          |
| 1493560 - | TSS_020738 | 1000 | 109    | 0         | 0 Ai  | antisense to gene(s) PMM1565;                                           |
| 1494281 + | TSS_008753 | 1000 | 278    | 0         | 0 Ai  | antisense to gene(s) PMM1566;                                           |
| 1494828 + | TSS_008756 | 1000 | 104    | 0         | 8 Ai  | antisense to gene(s) PMM1566;                                           |
| 1495329 + | TSS_008757 | 1000 | 1079   | 0         | 2 Ai  | antisense to gene(s) PMM1566;                                           |
| 1495758 - | TSS_020748 | 1000 | 1530   | 0         | 3 PAi | 19nt upstream of gene PMM1566; antisense to gene(s) PMM1567;            |
| 1496620 + | TSS_008761 | 1000 | 585    | 0         | 0 IAd | within gene(s) PMM1567; antisense to gene(s) PMM1568 (11nt downstream); |
| 1497016 - | TSS_020764 | 1000 | 11428  | 0         | 10 P  | 21nt upstream of gene PMM1568;                                          |
| 1497103 - | TSS_020768 | 1000 | 124    | 0         | 2 P   | 108nt upstream of gene PMM1568;                                         |
| 1499500 - | TSS_020778 | 1000 | 111    | 0         | 2 I   | within gene(s) PMM1570;                                                 |
| 1499641 - | TSS_020780 | 1000 | 304    | 0         | 0 P   | 35nt upstream of gene PMM1570;                                          |
| 1499652 + | TSS_008780 | 1000 | 188    | 0         | 11 P  | 65nt upstream of gene PMM1571;                                          |
| 1501198 + | TSS_008788 | 1000 | 135    | 0         | 0 Ai  | antisense to gene(s) PMM1573;                                           |
| 1502320 - | TSS_020787 | 1000 | 125    | 0         | 0 I   | within gene(s) PMM1574;                                                 |
| 1503407 + | TSS_008797 | 1000 | 162    | 0         | 1 Ai  | antisense to gene(s) PMM1575;                                           |
| 1504039 - | TSS_020812 | 1000 | 168    | 0         | 0 I   | within gene(s) PMM1575;                                                 |
| 1504074 + | TSS_008803 | 1000 | 10     | 0.0000064 | 0 Ai  | antisense to gene(s) PMM1575;                                           |
| 1504964 - | TSS_020824 | 1000 | 178    | 0         | 0 I   | within gene(s) PMM1575;                                                 |
| 1505706 - | TSS_020830 | 1000 | 648    | 0         | 0 I   | within gene(s) PMM1575;                                                 |
| 1508411 - | TSS_020839 | 1000 | 249    | 0         | 1 P   | 11nt upstream of gene PMM1577;                                          |
| 1508562 + | TSS_008812 | 1000 | 255    | 0         | 1 Ai  | antisense to gene(s) PMM1578;                                           |
| 1508903 - | TSS_027468 | 1000 | 72639  | 0         | 6 P   | 21nt upstream of gene PMM1578;                                          |
| 1510763 - | TSS_020866 | 1000 | 151    | 0         | 0 I   | within gene(s) PMM1580;                                                 |
| 1511027 + | TSS_008820 | 1000 | 993    | 0         | 1 Ai  | antisense to gene(s) PMM1580;                                           |
| 1512795 - | TSS_020872 | 1000 | 948    | 0         | 1 P   | 92nt upstream of gene PMM1581;                                          |
| 1513258 - | TSS_020877 | 1000 | 116    | 0         | 0 Ai  | antisense to gene(s) PMM1582;                                           |
| 1513707 - | TSS_020878 | 1000 | 363    | 0         | 0 Ai  | antisense to gene(s) PMM1582;                                           |
| 1514262 - | TSS_020880 | 1000 | 155    | 0         | 0 I   | within gene(s) PMM1583;                                                 |
| 1515544 - | TSS_020887 | 1000 | 644    | 0         | 1 I   | within gene(s) PMM1585;                                                 |
| 1517074 - | TSS_020891 | 1000 | 115    | 0         | 0 P   | 173nt upstream of gene PMM1586;                                         |
| 1518093 - | TSS_020891 | 1000 | 0      | 0         | 3 I   | 51nt upstream of gene PMM1588;                                          |
| 1518815 - | TSS_020898 | 1000 | 154    | 0         | 3 I   | within gene(s) PMM1589;                                                 |

|           |            |      |       |   |       |                                                               |
|-----------|------------|------|-------|---|-------|---------------------------------------------------------------|
| 1519244 - | TSS_020908 | 1000 | 971   | 0 | 1 P   | 24nt upstream of gene PMM1589;                                |
| 1523570 - | TSS_020922 | 1000 | 1103  | 0 | 1 P   | 23nt upstream of gene PMM1594;                                |
| 1524215 + | TSS_008856 | 1000 | 233   | 0 | 2 P   | 40nt upstream of gene PMM1596;                                |
| 1525299 + | TSS_008863 | 1000 | 107   | 0 | 9 I   | within gene(s) PMM1596;                                       |
| 1527577 + | TSS_008869 | 1000 | 100   | 0 | 1 Ai  | antisense to gene(s) PMM1598;                                 |
| 1528833 - | TSS_020944 | 1000 | 255   | 0 | 4 P   | 16nt upstream of gene PMM1599;                                |
| 1529501 - | TSS_020964 | 1000 | 296   | 0 | 0 I   | within gene(s) PMM1600;                                       |
| 1530109 + | TSS_008881 | 1000 | 311   | 0 | 0 Ai  | antisense to gene(s) PMM1600;                                 |
| 1530254 - | TSS_020983 | 1000 | 4762  | 0 | 2 P   | 27nt upstream of gene PMM1600;                                |
| 1530378 + | TSS_008884 | 1000 | 7600  | 0 | 3 P   | 3nt upstream of gene PMM1601;                                 |
| 1531400 - | TSS_020992 | 1000 | 336   | 0 | 0 Ai  | antisense to gene(s) PMM1601;                                 |
| 1533752 - | TSS_021001 | 1000 | 10495 | 0 | 8 P   | 14nt upstream of gene PMM1602;                                |
| 1533863 - | TSS_021007 | 1000 | 118   | 0 | 0 P   | 125nt upstream of gene PMM1602;                               |
| 1533931 + | TSS_021008 | 1000 | 0     | 0 | 0 O   | -                                                             |
| 1535492 - | TSS_021021 | 1000 | 257   | 0 | 0 PAi | 224nt upstream of gene PMM1604; antisense to gene(s) PMM1605; |
| 1536359 - | TSS_021027 | 1000 | 112   | 0 | 1 I   | within gene(s) PMM1606;                                       |
| 1537533 - | TSS_021034 | 1000 | 468   | 0 | 0 I   | within gene(s) PMM1606;                                       |
| 1537744 + | TSS_008932 | 1000 | 218   | 0 | 0 Ai  | antisense to gene(s) PMM1606;                                 |
| 1538095 - | TSS_027681 | 1000 | 29801 | 0 | 9 P   | 22nt upstream of gene PMM1607;                                |
| 1538185 + | TSS_012854 | 1000 | 8049  | 0 | 2 P   | 23nt upstream of gene PMM1608;                                |
| 1539467 + | TSS_008960 | 1000 | 2715  | 0 | 1 I   | within gene(s) PMM1609;                                       |
| 1539568 + | TSS_008963 | 1000 | 758   | 0 | 2 IP  | within gene(s) PMM1609; 176nt upstream of gene PMM1610;       |
| 1539778 - | TSS_021060 | 1000 | 353   | 0 | 2 Ai  | antisense to gene(s) PMM1610;                                 |
| 1543254 - | TSS_021122 | 1000 | 2481  | 0 | 2 P   | 126nt upstream of gene PMM1611;                               |
| 1543584 + | TSS_009046 | 1000 | 437   | 0 | 0 Ai  | antisense to gene(s) PMM1613;                                 |
| 1543786 + | TSS_009047 | 1000 | 343   | 0 | 0 Ai  | antisense to gene(s) PMM1613;                                 |
| 1546552 - | TSS_021140 | 1000 | 613   | 0 | 0 I   | within gene(s) PMM1615;                                       |
| 1547526 + | TSS_009063 | 1000 | 438   | 0 | 0 Ai  | antisense to gene(s) PMM1618;                                 |
| 1548296 + | TSS_009070 | 1000 | 105   | 0 | 7 Ai  | antisense to gene(s) PMM1618;                                 |
| 1548968 - | TSS_021150 | 1000 | 148   | 0 | 0 P   | 25nt upstream of gene PMM1618;                                |
| 1549235 - | TSS_021156 | 1000 | 1221  | 0 | 0 I   | within gene(s) PMM1619;                                       |
| 1549500 - | TSS_021169 | 1000 | 241   | 0 | 12 I  | within gene(s) PMM1619;                                       |
| 1549798 - | TSS_027963 | 1000 | 7806  | 0 | 8 P   | 58nt upstream of gene PMM1619;                                |
| 1550719 - | TSS_021174 | 1000 | 110   | 0 | 0 I   | within gene(s) PMM1621;                                       |
| 1551244 + | TSS_009076 | 1000 | 106   | 0 | 2 Ai  | antisense to gene(s) PMM1622;                                 |
| 1552273 - | TSS_021192 | 1000 | 2162  | 0 | 4 P   | 14nt upstream of gene PMM1622;                                |
| 1552380 + | TSS_009083 | 1000 | 268   | 0 | 1 P   | 12nt upstream of gene PMM1623;                                |
| 1552921 + | TSS_009089 | 1000 | 180   | 0 | 0 Ai  | antisense to gene(s) PMM1624;                                 |
| 1554498 - | TSS_021285 | 1000 | 881   | 0 | 15 I  | within gene(s) PMM1625;                                       |
| 1554856 - | TSS_021329 | 1000 | 7453  | 0 | 4 P   | 16nt upstream of gene PMM1625;                                |
| 1556300 - | TSS_021336 | 1000 | 156   | 0 | 0 P   | 17nt upstream of gene PMM1627;                                |
| 1557432 + | TSS_009123 | 1000 | 356   | 0 | 1 Ai  | antisense to gene(s) PMM1629;                                 |
| 1557486 - | TSS_021342 | 1000 | 146   | 0 | 13 I  | within gene(s) PMM1629;                                       |
| 1558291 - | TSS_021383 | 1000 | 1119  | 0 | 2 P   | 18nt upstream of gene PMM1629;                                |
| 1558425 + | TSS_009132 | 1000 | 228   | 0 | 0 Ai  | antisense to gene(s) PMM1630;                                 |
| 1559126 - | TSS_021401 | 1000 | 183   | 0 | 0 I   | within gene(s) PMM1630;                                       |
| 1559756 - | TSS_021427 | 1000 | 9490  | 0 | 9 I   | within gene(s) PMM1630;                                       |
| 1561061 - | TSS_021445 | 1000 | 8699  | 0 | 3 IP  | within gene(s) PMM1634; 205nt upstream of gene PMM1633;       |
| 1561701 + | TSS_009149 | 1000 | 177   | 0 | 2 Ai  | antisense to gene(s) PMM1634;                                 |
| 1562872 - | TSS_028599 | 1000 | 700   | 0 | 1 P   | 52nt upstream of gene PMM1634;                                |
| 1563062 - | TSS_021488 | 1000 | 268   | 0 | 4 PAi | 242nt upstream of gene PMM1634; antisense to gene(s) PMM1635; |
| 1563853 + | TSS_028602 | 1000 | 0     | 0 | 0 P   | 71nt upstream of gene PMM1636;                                |
| 1563968 - | TSS_021493 | 1000 | 559   | 0 | 0 Ai  | antisense to gene(s) PMM1636;                                 |
| 1564062 + | TSS_009161 | 1000 | 721   | 0 | 0 I   | within gene(s) PMM1636;                                       |
| 1564123 - | TSS_021494 | 1000 | 732   | 0 | 0 Ai  | antisense to gene(s) PMM1636;                                 |
| 1565055 - | TSS_021497 | 1000 | 266   | 0 | 0 Ai  | antisense to gene(s) PMM1637;                                 |
| 1566190 - | TSS_021501 | 1000 | 164   | 0 | 0 Ai  | antisense to gene(s) PMM1638;                                 |
| 1566861 + | TSS_009176 | 1000 | 151   | 0 | 1 Ai  | antisense to gene(s) PMM1639;                                 |
| 1567306 - | TSS_021525 | 1000 | 152   | 0 | 3 I   | within gene(s) PMM1639;                                       |
| 1568018 - | TSS_021542 | 1000 | 192   | 0 | 9 I   | within gene(s) PMM1639;                                       |
| 1568329 + | TSS_009191 | 1000 | 221   | 0 | 0 Ai  | antisense to gene(s) PMM1639;                                 |
| 1569177 - | TSS_021576 | 1000 | 487   | 0 | 0 P   | 31nt upstream of gene PMM1639;                                |
| 1569383 + | TSS_009200 | 1000 | 386   | 0 | 1 I   | within gene(s) PMM1640;                                       |
| 1570531 - | TSS_021581 | 1000 | 3692  | 0 | 2 I   | within gene(s) PMM1642;                                       |
| 1570651 - | TSS_021585 | 1000 | 0     | 0 | 0 P   | 14nt upstream of gene PMM1642;                                |
| 1571379 - | TSS_021592 | 1000 | 164   | 0 | 0 P   | 16nt upstream of gene PMM1643;                                |
| 1571635 - | TSS_028741 | 1000 | 4670  | 0 | 0 P   | 26nt upstream of gene PMM1644;                                |
| 1571739 + | TSS_009205 | 1000 | 287   | 0 | 0 P   | 14nt upstream of gene PMM1645;                                |
| 1573488 - | TSS_021600 | 1000 | 121   | 0 | 0 Ai  | antisense to gene(s) PMM1645;                                 |
| 1576258 + | TSS_009214 | 1000 | 396   | 0 | 0 I   | within gene(s) PMM1648;                                       |
| 1576861 + | TSS_009219 | 1000 | 797   | 0 | 2 I   | within gene(s) PMM1648;                                       |
| 1579478 - | TSS_028794 | 1000 | 0     | 0 | 0 I   | within gene(s) PMM1649;                                       |
| 1580087 - | TSS_021636 | 1000 | 214   | 0 | 3 P   | 22nt upstream of gene PMM1649;                                |
| 1580887 - | TSS_021645 | 1000 | 1840  | 0 | 3 I   | within gene(s) PMM1650;                                       |
| 1582484 + | TSS_009246 | 1000 | 275   | 0 | 0 Ai  | antisense to gene(s) PMM1652;                                 |
| 1582766 - | TSS_021667 | 1000 | 343   | 0 | 2 I   | within gene(s) PMM1652;                                       |
| 1583497 - | TSS_021692 | 1000 | 283   | 0 | 0 I   | within gene(s) PMM1652;                                       |
| 1584409 - | TSS_021701 | 1000 | 3969  | 0 | 2 I   | within gene(s) PMM1653;                                       |
| 1584725 + | TSS_009262 | 1000 | 219   | 0 | 1 Ai  | antisense to gene(s) PMM1653;                                 |
| 1585023 - | TSS_021709 | 1000 | 1473  | 0 | 5 IP  | within gene(s) PMM1654; 71nt upstream of gene PMM1653;        |
| 1586076 + | TSS_009270 | 1000 | 144   | 0 | 8 P   | 32nt upstream of gene PMM1655;                                |

|           |            |      |       |   |       |                                                               |
|-----------|------------|------|-------|---|-------|---------------------------------------------------------------|
| 1587579 + | TSS_009276 | 1000 | 768   | 0 | 2 P   | 16nt upstream of gene PMM1656;                                |
| 1588301 + | TSS_009285 | 1000 | 2386  | 0 | 5 P   | 45nt upstream of gene PMM1657;                                |
| 1589048 + | TSS_009308 | 1000 | 582   | 0 | 12 I  | within gene(s) PMM1657;                                       |
| 1590631 - | TSS_021725 | 1000 | 231   | 0 | 0 Ai  | antisense to gene(s) PMM1658;                                 |
| 1594453 + | TSS_009330 | 1000 | 2540  | 0 | 5 P   | 19nt upstream of gene PMM1661;                                |
| 1594701 + | TSS_009332 | 1000 | 500   | 0 | 0 I   | within gene(s) PMM1662;                                       |
| 1596577 + | TSS_013259 | 1000 | 1191  | 0 | 4 P   | 32nt upstream of gene PMM1665;                                |
| 1597137 + | TSS_009358 | 1000 | 227   | 0 | 11 I  | within gene(s) PMM1665;                                       |
| 1599261 - | TSS_021749 | 1000 | 827   | 0 | 0 P   | 34nt upstream of gene PMM1667;                                |
| 1602622 - | TSS_021788 | 1000 | 106   | 0 | 4 I   | within gene(s) PMM1669;                                       |
| 1604240 - | TSS_021796 | 1000 | 272   | 0 | 1 IP  | within gene(s) PMM1671; 236nt upstream of gene PMM1670;       |
| 1604740 - | TSS_021800 | 1000 | 273   | 0 | 2 P   | 24nt upstream of gene PMM1671;                                |
| 1604757 + | TSS_009398 | 1000 | 108   | 0 | 4 I   | within gene(s) PMM1672;                                       |
| 1605445 + | TSS_009413 | 1000 | 212   | 0 | 4 I   | within gene(s) PMM1672;                                       |
| 1605722 - | TSS_021804 | 1000 | 124   | 0 | 0 Ai  | antisense to gene(s) PMM1672;                                 |
| 1606251 + | TSS_009426 | 1000 | 252   | 0 | 2 P   | 15nt upstream of gene PMM1674;                                |
| 1607611 + | TSS_009433 | 1000 | 1085  | 0 | 2 IP  | within gene(s) PMM1674; 49nt upstream of gene PMM1675;        |
| 1607768 - | TSS_021809 | 1000 | 767   | 0 | 1 Ai  | antisense to gene(s) PMM1675;                                 |
| 1609627 + | TSS_009442 | 1000 | 523   | 0 | 2 P   | 4nt upstream of gene PMM1676;                                 |
| 1610827 - | TSS_021827 | 1000 | 206   | 0 | 0 O   | -                                                             |
| 1611481 + | TSS_009445 | 1000 | 1933  | 0 | 1 P   | 15nt upstream of gene PMM1678;                                |
| 1616290 + | TSS_009466 | 1000 | 437   | 0 | 0 Ai  | antisense to gene(s) PMM1682;                                 |
| 1616930 - | TSS_021857 | 1000 | 727   | 0 | 6 P   | 26nt upstream of gene PMM1682;                                |
| 1617422 - | TSS_021863 | 1000 | 704   | 0 | 9 P   | 93nt upstream of gene PMM1683;                                |
| 1618289 + | TSS_009474 | 1000 | 128   | 0 | 6 IP  | within gene(s) PMM1684; 78nt upstream of gene PMM1685;        |
| 1618516 + | TSS_009477 | 1000 | 160   | 0 | 0 I   | within gene(s) PMM1685;                                       |
| 1618595 + | TSS_009478 | 1000 | 144   | 0 | 0 I   | within gene(s) PMM1685;                                       |
| 1619698 - | TSS_021867 | 1000 | 219   | 0 | 0 Ai  | antisense to gene(s) PMM1686;                                 |
| 1619840 - | TSS_021868 | 1000 | 208   | 0 | 0 Ai  | antisense to gene(s) PMM1686;                                 |
| 1620131 + | TSS_009482 | 1000 | 327   | 0 | 4 P   | 24nt upstream of gene PMM1687;                                |
| 1621301 + | TSS_009487 | 1000 | 510   | 0 | 4 P   | 25nt upstream of gene PMM1688;                                |
| 1622476 - | TSS_021873 | 1000 | 1298  | 0 | 7 Ai  | antisense to gene(s) PMM1688;                                 |
| 1623168 + | TSS_009497 | 1000 | 1215  | 0 | 7 P   | 29nt upstream of gene PMM1689;                                |
| 1623293 + | TSS_009503 | 1000 | 435   | 0 | 2 I   | within gene(s) PMM1689;                                       |
| 1624375 + | TSS_009510 | 1000 | 228   | 0 | 0 I   | within gene(s) PMM1689;                                       |
| 1624911 - | TSS_021879 | 1000 | 104   | 0 | 0 Ai  | antisense to gene(s) PMM1690;                                 |
| 1625074 - | TSS_021880 | 1000 | 249   | 0 | 0 Ai  | antisense to gene(s) PMM1690;                                 |
| 1628185 - | TSS_021885 | 1000 | 229   | 0 | 1 Ai  | antisense to gene(s) PMM1693;                                 |
| 1628842 - | TSS_021886 | 1000 | 130   | 0 | 1 I   | within gene(s) PMM1694;                                       |
| 1628980 + | TSS_009519 | 1000 | 431   | 0 | 2 PAi | 173nt upstream of gene PMM1695; antisense to gene(s) PMM1694; |
| 1629235 + | TSS_009520 | 1000 | 288   | 0 | 1 I   | within gene(s) PMM1695;                                       |
| 1632609 + | TSS_009526 | 1000 | 153   | 0 | 1 P   | 98nt upstream of gene PMM1697;                                |
| 1632679 + | TSS_013570 | 1000 | 286   | 0 | 0 P   | 28nt upstream of gene PMM1697;                                |
| 1633040 + | TSS_009535 | 1000 | 229   | 0 | 0 I   | within gene(s) PMM1697;                                       |
| 1633252 - | TSS_021896 | 1000 | 188   | 0 | 0 Ai  | antisense to gene(s) PMM1697;                                 |
| 1634577 + | TSS_009550 | 1000 | 249   | 0 | 0 Ai  | antisense to gene(s) PMM1699;                                 |
| 1634772 + | TSS_009551 | 1000 | 129   | 0 | 0 Ai  | antisense to gene(s) PMM1699;                                 |
| 1635344 + | TSS_009552 | 1000 | 227   | 0 | 2 PAi | 199nt upstream of gene PMM1700; antisense to gene(s) PMM1699; |
| 1635526 + | TSS_009555 | 1000 | 389   | 0 | 5 P   | 17nt upstream of gene PMM1700;                                |
| 1639698 - | TSS_021915 | 1000 | 174   | 0 | 0 I   | within gene(s) PMM1702;                                       |
| 1640380 - | TSS_021917 | 1000 | 438   | 0 | 0 P   | 32nt upstream of gene PMM1702;                                |
| 1640445 + | TSS_009576 | 1000 | 445   | 0 | 0 I   | within gene(s) PMM1703;                                       |
| 1642285 - | TSS_022020 | 1000 | 438   | 0 | 24 I  | within gene(s) PMM1704;                                       |
| 1642444 - | TSS_022043 | 1000 | 799   | 0 | 19 I  | within gene(s) PMM1704;                                       |
| 1642606 - | TSS_022059 | 1000 | 704   | 0 | 3 I   | within gene(s) PMM1704;                                       |
| 1643399 - | TSS_022155 | 1000 | 12967 | 0 | 7 P   | 19nt upstream of gene PMM1704;                                |
| 1644415 + | TSS_009609 | 1000 | 2823  | 0 | 2 P   | 50nt upstream of gene PMM1706;                                |
| 1644804 + | TSS_009619 | 1000 | 196   | 0 | 2 I   | within gene(s) PMM1706;                                       |
| 1645357 - | TSS_022164 | 1000 | 189   | 0 | 0 I   | within gene(s) PMM1707;                                       |
| 1646216 - | TSS_022178 | 1000 | 4639  | 0 | 0 P   | 69nt upstream of gene PMM1707;                                |
| 1646419 + | TSS_013924 | 1000 | 566   | 0 | 2 P   | 20nt upstream of gene PMM1708;                                |
| 1647767 + | TSS_009648 | 1000 | 108   | 0 | 2 IP  | within gene(s) PMM1709; 21nt upstream of gene PMM1710;        |
| 1648727 + | TSS_009651 | 1000 | 92    | 0 | 0 Ai  | antisense to gene(s) PMM1711;                                 |
| 1650015 - | TSS_022201 | 1000 | 134   | 0 | 0 I   | within gene(s) PMM1712;                                       |
| 1654524 + | TSS_009664 | 1000 | 195   | 0 | 0 I   | within gene(s) PMM1714;                                       |
| 1656926 + | TSS_009673 | 1000 | 199   | 0 | 5 I   | within gene(s) PMM1716;                                       |

\*\*Class represents the classification of the start site. I represents internal start sites, Ai represents antisense start sites, P represents primary start sites, IP represents internal or primary start sites, PAi represents primary or Antisense start sites, Ad represents Antisense or downstream IAd represents internal Antisense or downstream and O represents orphan.
