# Supplementary material for: Nitrogen cost minimization is promoted by structural changes in the transcriptome of N-deprived Prochlorococcus cells
Source: PubMed Central journal article supplement (PMC5607370; doi:10.1038/ismej.2017.88), 2017-06-06
Supplement: ismej201788x16.pdf [file ismej201788x16.pdf]

Table S9. N-Starved Transcriptional Start Sites at 12 Hours Post Starvation Identified by TSSAR.

| Position | Strand | ID         | Score | Difference | p-Value | Positional Class | Comment                                                                |
|----------|--------|------------|-------|------------|---------|------------------|------------------------------------------------------------------------|
| 158      | +      | TSS_000004 | 1000  | 850        | 0       | 5 P              | 16nt upstream of gene PMM0001;                                         |
| 1089     | +      | TSS_000024 | 1000  | 198        | 0       | 12 IP            | within gene(s) PMM0001; 244nt upstream of gene PMM0002;                |
| 1991     | +      | TSS_000029 | 1000  | 563        | 0       | 4 IP             | within gene(s) PMM0002; 53nt upstream of gene PMM0003;                 |
| 2084     | +      | TSS_000032 | 1000  | 5414       | 0       | 2 I              | within gene(s) PMM0003;                                                |
| 2919     | -      | TSS_013990 | 1000  | 217        | 0       | 1 Ai             | antisense to gene(s) PMM0003;                                          |
| 3197     | +      | TSS_000062 | 1000  | 374        | 0       | 5 I              | within gene(s) PMM0003;                                                |
| 5103     | +      | TSS_000078 | 1000  | 242        | 0       | 0 I              | within gene(s) PMM0004;                                                |
| 8361     | -      | TSS_014015 | 1000  | 1179       | 0       | 7 P              | 33nt upstream of gene PMM0005;                                         |
| 9568     | +      | TSS_000084 | 1000  | 70         | 0       | 0 Ai             | antisense to gene(s) PMM0007;                                          |
| 10339    | +      | TSS_000087 | 1000  | 2189       | 0       | 4 P              | 28nt upstream of gene PMM0008;                                         |
| 11772    | +      | TSS_000101 | 1000  | 101        | 0       | 1 P              | 21nt upstream of gene PMM0010;                                         |
| 12129    | +      | TSS_000105 | 1000  | 71         | 0       | 3 I              | within gene(s) PMM0010;                                                |
| 14116    | -      | TSS_014030 | 1000  | 1896       | 0       | 6 Ai             | antisense to gene(s) PMM0011;                                          |
| 14568    | +      | TSS_000124 | 1000  | 1239       | 0       | 1 P              | 17nt upstream of gene PMM0012;                                         |
| 14964    | -      | TSS_014035 | 1000  | 119        | 0       | 0 Ai             | antisense to gene(s) PMM0012;                                          |
| 15146    | +      | TSS_000146 | 1000  | 193        | 0       | 9 I              | within gene(s) PMM0012;                                                |
| 16016    | +      | TSS_000160 | 1000  | 20080      | 0       | 16 P             | 2nt upstream of gene PMM0013;                                          |
| 16255    | -      | TSS_014041 | 1000  | 139        | 0       | 1 Ai             | antisense to gene(s) PMM0013;                                          |
| 17066    | +      | TSS_000176 | 1000  | 115        | 0       | 1 Ai             | antisense to gene(s) PMM0014;                                          |
| 17671    | +      | TSS_000179 | 1000  | 267        | 0       | 2 P              | 41nt upstream of gene PMM0015;                                         |
| 18267    | +      | TSS_000190 | 1000  | 160        | 0       | 0 P              | 16nt upstream of gene PMM0016;                                         |
| 23179    | -      | TSS_014061 | 1000  | 389        | 0       | 1 I              | within gene(s) PMM0022;                                                |
| 24122    | +      | TSS_000226 | 1000  | 111        | 0       | 1 P              | 28nt upstream of gene PMM0023;                                         |
| 24575    | -      | TSS_014066 | 1000  | 113        | 0       | 0 Ai             | antisense to gene(s) PMM0023;                                          |
| 25810    | -      | TSS_014072 | 1000  | 97         | 0       | 0 I              | within gene(s) PMM0024;                                                |
| 25886    | -      | TSS_014074 | 1000  | 1148       | 0       | 1 I              | within gene(s) PMM0024;                                                |
| 26468    | -      | TSS_014079 | 1000  | 720        | 0       | 1 I              | within gene(s) PMM0025;                                                |
| 27201    | +      | TSS_000241 | 1000  | 150        | 0       | 0 P              | 86nt upstream of gene PMM0026;                                         |
| 27273    | +      | TSS_000242 | 1000  | 313        | 0       | 0 P              | 14nt upstream of gene PMM0026;                                         |
| 27367    | +      | TSS_000244 | 1000  | 196        | 0       | 0 I              | within gene(s) PMM0026;                                                |
| 27478    | -      | TSS_014094 | 1000  | 385        | 0       | 1 Ai             | antisense to gene(s) PMM0026;                                          |
| 27552    | +      | TSS_000247 | 1000  | 81         | 0       | 1 I              | within gene(s) PMM0026;                                                |
| 27755    | +      | TSS_000249 | 1000  | 425        | 0       | 0 IP             | within gene(s) PMM0026; 92nt upstream of gene PMM0027;                 |
| 28211    | +      | TSS_000255 | 1000  | 132        | 0       | 1 I              | within gene(s) PMM0027;                                                |
| 30271    | +      | TSS_000258 | 1000  | 1488       | 0       | 3 I              | within gene(s) PMM0030;                                                |
| 30946    | -      | TSS_014113 | 1000  | 299        | 0       | 4 P              | 16nt upstream of gene PMM0031;                                         |
| 31393    | -      | TSS_014141 | 1000  | 363        | 0       | 10 I             | within gene(s) PMM0032;                                                |
| 31536    | -      | TSS_014155 | 1000  | 10678      | 0       | 3 P              | 16nt upstream of gene PMM0032;                                         |
| 31640    | +      | TSS_000276 | 1000  | 485        | 0       | 2 Ai             | antisense to gene(s) PMM0033;                                          |
| 32109    | -      | TSS_014163 | 1000  | 175        | 0       | 4 P              | 18nt upstream of gene PMM0033;                                         |
| 32317    | +      | TSS_000281 | 1000  | 4985       | 0       | 4 P              | 18nt upstream of gene PMM0034;                                         |
| 32608    | -      | TSS_014167 | 1000  | 153        | 0       | 0 I              | within gene(s) PMM0035;                                                |
| 32866    | -      | TSS_014189 | 1000  | 222        | 0       | 20 I             | within gene(s) PMM0035;                                                |
| 33078    | +      | TSS_000292 | 1000  | 748        | 0       | 1 Ai             | antisense to gene(s) PMM0035;                                          |
| 33713    | -      | TSS_014274 | 1000  | 11654      | 0       | 2 P              | 16nt upstream of gene PMM0035;                                         |
| 34181    | +      | TSS_000301 | 1000  | 105        | 0       | 0 I              | within gene(s) PMM0036;                                                |
| 34926    | +      | TSS_000302 | 1000  | 544        | 0       | 0 I              | within gene(s) PMM0037;                                                |
| 34946    | +      | TSS_000303 | 1000  | 30         | 0       | 0 I              | within gene(s) PMM0037;                                                |
| 35112    | +      | TSS_000304 | 1000  | 141        | 0       | 0 I              | within gene(s) PMM0037;                                                |
| 36839    | +      | TSS_000319 | 1000  | 160        | 0       | 0 I              | within gene(s) PMM0038;                                                |
| 37053    | -      | TSS_014282 | 1000  | 247        | 0       | 0 Ai             | antisense to gene(s) PMM0038;                                          |
| 37342    | +      | TSS_000323 | 1000  | 1210       | 0       | 3 P              | 18nt upstream of gene PMM0039;                                         |
| 41761    | -      | TSS_014294 | 1000  | 145        | 0       | 0 I              | within gene(s) PMM0042;                                                |
| 44029    | +      | TSS_000344 | 1000  | 338        | 0       | 1 Ai             | antisense to gene(s) PMM0043;                                          |
| 44220    | -      | TSS_014327 | 1000  | 1003       | 0       | 0 P              | 30nt upstream of gene PMM0043;                                         |
| 44838    | -      | TSS_014330 | 1000  | 371        | 0       | 2 Ai             | antisense to gene(s) PMM0044;                                          |
| 46192    | +      | TSS_000355 | 1000  | 111        | 0       | 7 I              | within gene(s) PMM0044;                                                |
| 46967    | -      | TSS_014336 | 1000  | 211        | 0       | 7 IAd            | within gene(s) PMM0045; antisense to gene(s) PMM0044 (3nt downstream); |
| 47672    | -      | TSS_014342 | 1000  | 201        | 0       | 5 I              | within gene(s) PMM0045;                                                |
| 47824    | +      | TSS_000363 | 1000  | 1337       | 0       | 4 Ai             | antisense to gene(s) PMM0045;                                          |
| 49002    | +      | TSS_000368 | 1000  | 392        | 0       | 2 P              | 15nt upstream of gene PMM0046;                                         |
| 50616    | +      | TSS_000372 | 1000  | 607        | 0       | 0 P              | 56nt upstream of gene PMM0048;                                         |
| 52823    | +      | TSS_000424 | 1000  | 472        | 0       | 5 P              | 44nt upstream of gene PMM0050;                                         |
| 52948    | -      | TSS_014357 | 1000  | 131        | 0       | 1 PAi            | 187nt upstream of gene PMM0049; antisense to gene(s) PMM0050;          |
| 54384    | -      | TSS_014363 | 1000  | 355        | 0       | 63 I             | within gene(s) PMM0051;                                                |
| 56528    | -      | TSS_014400 | 1000  | 4036       | 0       | 0 O              | -                                                                      |
| 56601    | -      | TSS_014401 | 1000  | 1566       | 0       | 0 O              | -                                                                      |
| 58622    | -      | TSS_014433 | 1000  | 160        | 0       | 3 I              | within gene(s) PMM0055;                                                |
| 58631    | -      | TSS_014434 | 1000  | 93         | 0       | 0 I              | within gene(s) PMM0055;                                                |
| 58796    | +      | TSS_000439 | 1000  | 6465       | 0       | 2 O              | -                                                                      |
| 59479    | +      | TSS_000447 | 1000  | 1183       | 0       | 1 P              | 17nt upstream of gene PMM0057;                                         |
| 63006    | +      | TSS_000471 | 1000  | 5405       | 0       | 2 IP             | within gene(s) PMM0057; 126nt upstream of gene PMM0058;                |
| 63116    | +      | TSS_000473 | 1000  | 301        | 0       | 2 P              | 16nt upstream of gene PMM0058;                                         |
| 63461    | +      | TSS_000483 | 1000  | 146        | 0       | 3 I              | within gene(s) PMM0058;                                                |
| 66139    | +      | TSS_000493 | 1000  | 112        | 0       | 0 I              | within gene(s) PMM0060;                                                |
| 66518    | +      | TSS_000496 | 1000  | 202        | 0       | 2 I              | within gene(s) PMM0060;                                                |
| 66654    | +      | TSS_000499 | 1000  | 79         | 0       | 1 I              | within gene(s) PMM0060;                                                |
| 67529    | -      | TSS_014465 | 1000  | 148        | 0       | 2 P              | 16nt upstream of gene PMM0061;                                         |

|          |            |      |       |   |       |                                                         |
|----------|------------|------|-------|---|-------|---------------------------------------------------------|
| 67586 +  | TSS_000507 | 1000 | 1846  | 0 | 2 P   | 66nt upstream of gene PMM0062;                          |
| 67893 +  | TSS_000516 | 1000 | 541   | 0 | 2 I   | within gene(s) PMM0063;                                 |
| 68237 +  | TSS_000555 | 1000 | 243   | 0 | 21 I  | within gene(s) PMM0063;                                 |
| 68394 -  | TSS_014482 | 1000 | 237   | 0 | 0 Ai  | antisense to gene(s) PMM0063;                           |
| 68452 +  | TSS_000595 | 1000 | 382   | 0 | 21 I  | within gene(s) PMM0063;                                 |
| 69179 -  | TSS_014492 | 1000 | 136   | 0 | 1 IP  | within gene(s) PMM0065; 143nt upstream of gene PMM0064; |
| 70887 -  | TSS_014503 | 1000 | 90    | 0 | 0 I   | within gene(s) PMM0065;                                 |
| 72400 -  | TSS_014518 | 1000 | 282   | 0 | 0 P   | 32nt upstream of gene PMM0068;                          |
| 73910 -  | TSS_014521 | 1000 | 269   | 0 | 0 Ai  | antisense to gene(s) PMM0069;                           |
| 74118 -  | TSS_014523 | 1000 | 87    | 0 | 0 Ai  | antisense to gene(s) PMM0069;                           |
| 75013 +  | TSS_000645 | 1000 | 58    | 0 | 0 Ai  | antisense to gene(s) PMM0070;                           |
| 75278 -  | TSS_014527 | 1000 | 70    | 0 | 0 I   | within gene(s) PMM0070;                                 |
| 77020 +  | TSS_000647 | 1000 | 73    | 0 | 2 Ai  | antisense to gene(s) PMM0072;                           |
| 78158 -  | TSS_014552 | 1000 | 169   | 0 | 0 I   | within gene(s) PMM0073;                                 |
| 78218 -  | TSS_014553 | 1000 | 209   | 0 | 0 I   | within gene(s) PMM0073;                                 |
| 78295 -  | TSS_014555 | 1000 | 458   | 0 | 1 I   | within gene(s) PMM0073;                                 |
| 79154 -  | TSS_014587 | 1000 | 779   | 0 | 4 P   | 33nt upstream of gene PMM0073;                          |
| 79823 +  | TSS_000655 | 1000 | 112   | 0 | 0 P   | 22nt upstream of gene PMM0075;                          |
| 80192 -  | TSS_014591 | 1000 | 88    | 0 | 0 Ai  | antisense to gene(s) PMM0075;                           |
| 80289 +  | TSS_000660 | 1000 | 369   | 0 | 14 I  | within gene(s) PMM0075;                                 |
| 82229 -  | TSS_014598 | 1000 | 148   | 0 | 0 Ai  | antisense to gene(s) PMM0076;                           |
| 83123 +  | TSS_000691 | 1000 | 249   | 0 | 3 I   | within gene(s) PMM0077;                                 |
| 88866 +  | TSS_000709 | 1000 | 192   | 0 | 6 I   | within gene(s) PMM0083;                                 |
| 89200 -  | TSS_014605 | 1000 | 160   | 0 | 4 Ai  | antisense to gene(s) PMM0083;                           |
| 90051 +  | TSS_000721 | 1000 | 1090  | 0 | 1 I   | within gene(s) PMM0084;                                 |
| 91200 +  | TSS_000731 | 1000 | 1766  | 0 | 7 IP  | within gene(s) PMM0084; 60nt upstream of gene PMM0085;  |
| 91487 -  | TSS_014615 | 1000 | 195   | 0 | 0 Ai  | antisense to gene(s) PMM0085;                           |
| 91506 +  | TSS_000736 | 1000 | 212   | 0 | 0 I   | within gene(s) PMM0085;                                 |
| 91711 -  | TSS_014617 | 1000 | 848   | 0 | 1 Ai  | antisense to gene(s) PMM0085;                           |
| 92216 -  | TSS_014618 | 1000 | 142   | 0 | 0 I   | within gene(s) PMM0086;                                 |
| 92293 -  | TSS_014621 | 1000 | 3117  | 0 | 3 P   | 20nt upstream of gene PMM0086;                          |
| 92350 +  | TSS_000746 | 1000 | 2741  | 0 | 1 P   | 40nt upstream of gene PMM0087;                          |
| 92441 +  | TSS_000752 | 1000 | 191   | 0 | 15 I  | within gene(s) PMM0087;                                 |
| 92747 +  | TSS_000769 | 1000 | 1834  | 0 | 1 P   | 17nt upstream of gene PMM0088;                          |
| 93143 -  | TSS_014632 | 1000 | 1026  | 0 | 2 O   | -                                                       |
| 93899 +  | TSS_000778 | 1000 | 84    | 0 | 1 I   | within gene(s) PMM0089;                                 |
| 96428 +  | TSS_000782 | 1000 | 401   | 0 | 2 P   | 24nt upstream of gene PMM0091;                          |
| 96530 +  | TSS_000795 | 1000 | 136   | 0 | 11 I  | within gene(s) PMM0091;                                 |
| 96699 +  | TSS_000815 | 1000 | 422   | 0 | 19 IP | within gene(s) PMM0091; 121nt upstream of gene PMM0092; |
| 97181 +  | TSS_000830 | 1000 | 8423  | 0 | 5 P   | 19nt upstream of gene PMM0093;                          |
| 98015 -  | TSS_014647 | 1000 | 192   | 0 | 0 I   | within gene(s) PMM0095;                                 |
| 98676 -  | TSS_014651 | 1000 | 260   | 0 | 1 P   | 16nt upstream of gene PMM0095;                          |
| 99057 +  | TSS_000836 | 1000 | 111   | 0 | 0 Ai  | antisense to gene(s) PMM0096;                           |
| 99177 +  | TSS_000837 | 1000 | 138   | 0 | 0 Ai  | antisense to gene(s) PMM0096;                           |
| 104291 + | TSS_000856 | 1000 | 199   | 0 | 0 I   | within gene(s) PMM0100;                                 |
| 105223 - | TSS_014665 | 1000 | 144   | 0 | 0 I   | within gene(s) PMM0101;                                 |
| 105437 - | TSS_014669 | 1000 | 297   | 0 | 3 I   | within gene(s) PMM0101;                                 |
| 105946 - | TSS_014676 | 1000 | 430   | 0 | 0 P   | 30nt upstream of gene PMM0101;                          |
| 107782 - | TSS_014682 | 1000 | 156   | 0 | 5 I   | within gene(s) PMM0103;                                 |
| 107836 - | TSS_014684 | 1000 | 101   | 0 | 0 I   | within gene(s) PMM0103;                                 |
| 109827 + | TSS_000864 | 1000 | 112   | 0 | 0 Ai  | antisense to gene(s) PMM0105;                           |
| 110281 + | TSS_000865 | 1000 | 899   | 0 | 1 Ai  | antisense to gene(s) PMM0106;                           |
| 110766 - | TSS_014698 | 1000 | 12848 | 0 | 10 P  | 12nt upstream of gene PMM0106;                          |
| 114981 - | TSS_014707 | 1000 | 162   | 0 | 3 IP  | within gene(s) PMM0115; 35nt upstream of gene PMM0114;  |
| 116133 - | TSS_014733 | 1000 | 70    | 0 | 3 I   | within gene(s) PMM0115;                                 |
| 116412 - | TSS_014741 | 1000 | 66    | 0 | 8 P   | 9nt upstream of gene PMM0115;                           |
| 116480 - | TSS_010218 | 1000 | 9543  | 0 | 0 P   | 20nt upstream of gene PMM0116;                          |
| 117055 + | TSS_000922 | 1000 | 123   | 0 | 5 I   | within gene(s) PMM0117;                                 |
| 118346 - | TSS_014750 | 1000 | 226   | 0 | 0 Ai  | antisense to gene(s) PMM0118;                           |
| 119698 - | TSS_014784 | 1000 | 395   | 0 | 3 P   | 16nt upstream of gene PMM0120;                          |
| 119798 + | TSS_000933 | 1000 | 2206  | 0 | 2 P   | 28nt upstream of gene PMM0121;                          |
| 119905 + | TSS_000937 | 1000 | 314   | 0 | 0 I   | within gene(s) PMM0121;                                 |
| 120922 - | TSS_014793 | 1000 | 123   | 0 | 0 IP  | within gene(s) PMM0123; 172nt upstream of gene PMM0122; |
| 120990 - | TSS_014800 | 1000 | 754   | 0 | 13 IP | within gene(s) PMM0123; 240nt upstream of gene PMM0122; |
| 121450 - | TSS_014816 | 1000 | 102   | 0 | 12 I  | within gene(s) PMM0123;                                 |
| 121764 - | TSS_014822 | 1000 | 259   | 0 | 0 P   | 29nt upstream of gene PMM0123;                          |
| 122897 + | TSS_000946 | 1000 | 906   | 0 | 1 O   | -                                                       |
| 123251 + | TSS_000948 | 1000 | 543   | 0 | 1 P   | 68nt upstream of gene PMM0126;                          |
| 123709 - | TSS_014832 | 1000 | 55    | 0 | 2 Ai  | antisense to gene(s) PMM0126;                           |
| 123779 + | TSS_000953 | 1000 | 2133  | 0 | 2 I   | within gene(s) PMM0126;                                 |
| 125323 + | TSS_000965 | 1000 | 1778  | 0 | 1 P   | 35nt upstream of gene PMM0128;                          |
| 125778 + | TSS_001001 | 1000 | 132   | 0 | 27 I  | within gene(s) PMM0128;                                 |
| 128699 - | TSS_014848 | 1000 | 72    | 0 | 0 I   | within gene(s) PMM0131;                                 |
| 129278 - | TSS_014851 | 1000 | 146   | 0 | 3 I   | within gene(s) PMM0131;                                 |
| 130071 - | TSS_014856 | 1000 | 104   | 0 | 3 P   | 34nt upstream of gene PMM0131;                          |
| 130794 + | TSS_001018 | 1000 | 1680  | 0 | 0 Ai  | antisense to gene(s) PMM0133;                           |
| 130945 + | TSS_001020 | 1000 | 135   | 0 | 0 Ai  | antisense to gene(s) PMM0133;                           |
| 131956 - | TSS_014865 | 1000 | 94    | 0 | 0 I   | within gene(s) PMM0133;                                 |
| 132089 - | TSS_014867 | 1000 | 117   | 0 | 3 P   | 48nt upstream of gene PMM0133;                          |
| 132109 + | TSS_001026 | 1000 | 762   | 0 | 3 P   | 39nt upstream of gene PMM0134;                          |

|          |            |      |       |   |       |                                                                         |
|----------|------------|------|-------|---|-------|-------------------------------------------------------------------------|
| 132594 + | TSS_001042 | 1000 | 66    | 0 | 0 I   | within gene(s) PMM0134;                                                 |
| 132850 - | TSS_014870 | 1000 | 443   | 0 | 0 Ai  | antisense to gene(s) PMM0134;                                           |
| 134228 - | TSS_014873 | 1000 | 1683  | 0 | 3 Ai  | antisense to gene(s) PMM0135;                                           |
| 134332 + | TSS_001051 | 1000 | 217   | 0 | 0 P   | 17nt upstream of gene PMM0136;                                          |
| 135334 + | TSS_001054 | 1000 | 162   | 0 | 0 IP  | within gene(s) PMM0136; 37nt upstream of gene PMM0137;                  |
| 136633 + | TSS_001059 | 1000 | 109   | 0 | 0 I   | within gene(s) PMM0138;                                                 |
| 139538 - | TSS_014885 | 1000 | 114   | 0 | 3 IAd | within gene(s) PMM0143; antisense to gene(s) PMM0142 (22nt downstream); |
| 139888 + | TSS_001065 | 1000 | 1752  | 0 | 1 Ai  | antisense to gene(s) PMM0143;                                           |
| 140081 - | TSS_014893 | 1000 | 696   | 0 | 0 I   | within gene(s) PMM0143;                                                 |
| 140446 - | TSS_014896 | 1000 | 79    | 0 | 1 P   | 20nt upstream of gene PMM0143;                                          |
| 141294 - | TSS_014931 | 1000 | 107   | 0 | 0 I   | within gene(s) PMM0144;                                                 |
| 141905 - | TSS_014949 | 1000 | 881   | 0 | 0 P   | 38nt upstream of gene PMM0144;                                          |
| 141924 + | TSS_001070 | 1000 | 528   | 0 | 5 P   | 34nt upstream of gene PMM0145;                                          |
| 142219 + | TSS_001093 | 1000 | 165   | 0 | 8 IP  | within gene(s) PMM0145; 83nt upstream of gene PMM0146;                  |
| 142730 - | TSS_014954 | 1000 | 74    | 0 | 1 Ai  | antisense to gene(s) PMM0146;                                           |
| 142788 + | TSS_001112 | 1000 | 62    | 0 | 3 I   | within gene(s) PMM0146;                                                 |
| 142832 - | TSS_014956 | 1000 | 189   | 0 | 0 Ai  | antisense to gene(s) PMM0146;                                           |
| 143021 - | TSS_014962 | 1000 | 146   | 0 | 2 I   | within gene(s) PMM0147;                                                 |
| 143488 - | TSS_014969 | 1000 | 259   | 0 | 3 I   | within gene(s) PMM0147;                                                 |
| 143883 - | TSS_014979 | 1000 | 218   | 0 | 12 P  | 14nt upstream of gene PMM0147;                                          |
| 143931 + | TSS_001116 | 1000 | 113   | 0 | 3 P   | 23nt upstream of gene PMM0148;                                          |
| 144023 + | TSS_001117 | 1000 | 82    | 0 | 0 I   | within gene(s) PMM0148;                                                 |
| 144701 + | TSS_001120 | 1000 | 1620  | 0 | 3 P   | 15nt upstream of gene PMM0149;                                          |
| 144965 + | TSS_001131 | 1000 | 345   | 0 | 9 I   | within gene(s) PMM0149;                                                 |
| 145139 + | TSS_001136 | 1000 | 145   | 0 | 0 I   | within gene(s) PMM0149;                                                 |
| 145211 + | TSS_001137 | 1000 | 431   | 0 | 3 I   | within gene(s) PMM0149;                                                 |
| 145511 + | TSS_001155 | 1000 | 399   | 0 | 3 I   | within gene(s) PMM0149;                                                 |
| 145715 + | TSS_001168 | 1000 | 199   | 0 | 9 I   | within gene(s) PMM0149;                                                 |
| 146423 - | TSS_014996 | 1000 | 179   | 0 | 0 Ai  | antisense to gene(s) PMM0149;                                           |
| 146611 + | TSS_001209 | 1000 | 106   | 0 | 2 IP  | within gene(s) PMM0149; 202nt upstream of gene PMM0150;                 |
| 146794 + | TSS_001212 | 1000 | 33574 | 0 | 2 P   | 19nt upstream of gene PMM0150;                                          |
| 147116 + | TSS_001224 | 1000 | 263   | 0 | 6 I   | within gene(s) PMM0150;                                                 |
| 147332 + | TSS_001231 | 1000 | 436   | 0 | 0 I   | within gene(s) PMM0150;                                                 |
| 147440 + | TSS_001236 | 1000 | 453   | 0 | 0 I   | within gene(s) PMM0150;                                                 |
| 147473 + | TSS_001238 | 1000 | 238   | 0 | 4 I   | within gene(s) PMM0150;                                                 |
| 147731 - | TSS_015002 | 1000 | 192   | 0 | 1 Ai  | antisense to gene(s) PMM0150;                                           |
| 147971 + | TSS_001271 | 1000 | 221   | 0 | 6 I   | within gene(s) PMM0150;                                                 |
| 148515 + | TSS_001281 | 1000 | 166   | 0 | 1 P   | 169nt upstream of gene PMM0151;                                         |
| 149428 + | TSS_001286 | 1000 | 156   | 0 | 1 P   | 19nt upstream of gene PMM0152;                                          |
| 150290 + | TSS_001294 | 1000 | 211   | 0 | 7 I   | within gene(s) PMM0152;                                                 |
| 151121 + | TSS_001297 | 1000 | 71    | 0 | 0 Ai  | antisense to gene(s) PMM0153;                                           |
| 151351 - | TSS_015018 | 1000 | 189   | 0 | 0 I   | within gene(s) PMM0153;                                                 |
| 151556 + | TSS_001301 | 1000 | 65    | 0 | 3 P   | 21nt upstream of gene PMM0154;                                          |
| 154617 - | TSS_015052 | 1000 | 3082  | 0 | 60 IP | within gene(s) PMM0159; 214nt upstream of gene PMM0158;                 |
| 154809 - | TSS_015069 | 1000 | 372   | 0 | 18 I  | within gene(s) PMM0159;                                                 |
| 154860 - | TSS_015079 | 1000 | 114   | 0 | 33 I  | within gene(s) PMM0159;                                                 |
| 154964 - | TSS_015097 | 1000 | 122   | 0 | 3 I   | within gene(s) PMM0159;                                                 |
| 155061 - | TSS_015098 | 1000 | 756   | 0 | 4 P   | 18nt upstream of gene PMM0159;                                          |
| 155334 - | TSS_015103 | 1000 | 89    | 0 | 0 I   | within gene(s) PMM0160;                                                 |
| 155927 - | TSS_015116 | 1000 | 253   | 0 | 6 I   | within gene(s) PMM0160;                                                 |
| 156249 - | TSS_015126 | 1000 | 340   | 0 | 6 P   | 18nt upstream of gene PMM0160;                                          |
| 157478 - | TSS_015144 | 1000 | 222   | 0 | 0 P   | 26nt upstream of gene PMM0161;                                          |
| 159159 + | TSS_001319 | 1000 | 87    | 0 | 0 I   | within gene(s) PMM0163;                                                 |
| 160039 - | TSS_015153 | 1000 | 84    | 0 | 0 I   | within gene(s) PMM0164;                                                 |
| 160552 - | TSS_015186 | 1000 | 188   | 0 | 1 I   | within gene(s) PMM0164;                                                 |
| 160684 - | TSS_015195 | 1000 | 2024  | 0 | 5 P   | 18nt upstream of gene PMM0164;                                          |
| 161898 + | TSS_001329 | 1000 | 261   | 0 | 0 Ai  | antisense to gene(s) PMM0167;                                           |
| 162263 - | TSS_015203 | 1000 | 309   | 0 | 2 P   | 61nt upstream of gene PMM0167;                                          |
| 162318 + | TSS_001331 | 1000 | 694   | 0 | 1 P   | 21nt upstream of gene PMM0168;                                          |
| 163563 - | TSS_015219 | 1000 | 114   | 0 | 0 I   | within gene(s) PMM0169;                                                 |
| 163802 - | TSS_015226 | 1000 | 408   | 0 | 0 P   | 32nt upstream of gene PMM0169;                                          |
| 163830 + | TSS_001336 | 1000 | 301   | 0 | 0 I   | within gene(s) PMM0170;                                                 |
| 165865 + | TSS_001343 | 1000 | 113   | 0 | 6 PAi | 60nt upstream of gene PMM0172; antisense to gene(s) PMM0171;            |
| 165910 + | TSS_001346 | 1000 | 23006 | 0 | 3 P   | 15nt upstream of gene PMM0172;                                          |
| 166228 + | TSS_001376 | 1000 | 214   | 0 | 16 I  | within gene(s) PMM0172;                                                 |
| 166513 + | TSS_001406 | 1000 | 471   | 0 | 6 I   | within gene(s) PMM0172;                                                 |
| 172122 - | TSS_015248 | 1000 | 182   | 0 | 0 Ai  | antisense to gene(s) PMM0177;                                           |
| 173360 - | TSS_015252 | 1000 | 160   | 0 | 2 P   | 17nt upstream of gene PMM0179;                                          |
| 173404 + | TSS_001482 | 1000 | 1077  | 0 | 0 P   | 16nt upstream of gene PMM0180;                                          |
| 176333 + | TSS_001488 | 1000 | 73    | 0 | 0 P   | 11nt upstream of gene PMM0185;                                          |
| 176661 + | TSS_001491 | 1000 | 71    | 0 | 5 I   | within gene(s) PMM0185;                                                 |
| 176904 - | TSS_015261 | 1000 | 114   | 0 | 0 Ai  | antisense to gene(s) PMM0185;                                           |
| 178914 - | TSS_015265 | 1000 | 1449  | 0 | 1 I   | within gene(s) PMM0187;                                                 |
| 180315 + | TSS_001498 | 1000 | 517   | 0 | 0 Ai  | antisense to gene(s) PMM0188;                                           |
| 182433 - | TSS_015271 | 1000 | 60    | 0 | 0 PAi | 92nt upstream of gene PMM0189; antisense to gene(s) PMM0190;            |
| 183419 - | TSS_015274 | 1000 | 339   | 0 | 3 I   | within gene(s) PMM0191;                                                 |
| 185776 + | TSS_001509 | 1000 | 61    | 0 | 0 I   | within gene(s) PMM0192;                                                 |
| 187884 - | TSS_015294 | 1000 | 111   | 0 | 0 IP  | within gene(s) PMM0194; 90nt upstream of gene PMM0193;                  |
| 188529 + | TSS_001515 | 1000 | 73    | 0 | 0 Ai  | antisense to gene(s) PMM0194;                                           |
| 188865 + | TSS_001516 | 1000 | 220   | 0 | 0 P   | 18nt upstream of gene PMM0195;                                          |

|          |            |      |        |   |       |                                                               |
|----------|------------|------|--------|---|-------|---------------------------------------------------------------|
| 189007 + | TSS_001518 | 1000 | 234    | 0 | 6 I   | within gene(s) PMM0195;                                       |
| 195017 - | TSS_015312 | 1000 | 200    | 0 | 1 P   | 46nt upstream of gene PMM0200;                                |
| 195266 + | TSS_001543 | 1000 | 217    | 0 | 0 Ai  | antisense to gene(s) PMM0201;                                 |
| 195331 - | TSS_015322 | 1000 | 61     | 0 | 3 I   | within gene(s) PMM0201;                                       |
| 196137 - | TSS_015338 | 1000 | 5218   | 0 | 5 P   | 169nt upstream of gene PMM0202;                               |
| 196154 + | TSS_001545 | 1000 | 205    | 0 | 0 Ad  | antisense to gene(s) PMM0203 (8nt downstream);                |
| 196639 - | TSS_015343 | 1000 | 226    | 0 | 0 I   | within gene(s) PMM0203;                                       |
| 197001 - | TSS_015349 | 1000 | 126    | 0 | 0 IP  | within gene(s) PMM0204; 133nt upstream of gene PMM0203;       |
| 197448 - | TSS_015357 | 1000 | 188    | 0 | 1 IP  | within gene(s) PMM0205; 88nt upstream of gene PMM0204;        |
| 197685 + | TSS_001550 | 1000 | 188    | 0 | 0 Ai  | antisense to gene(s) PMM0205;                                 |
| 197771 - | TSS_015365 | 1000 | 259    | 0 | 0 I   | within gene(s) PMM0205;                                       |
| 197876 - | TSS_015373 | 1000 | 95     | 0 | 5 I   | within gene(s) PMM0205;                                       |
| 198069 - | TSS_015381 | 1000 | 125    | 0 | 1 P   | 34nt upstream of gene PMM0205;                                |
| 198181 - | TSS_015383 | 1000 | 646    | 0 | 0 IP  | within gene(s) PMM0206; 146nt upstream of gene PMM0205;       |
| 199333 - | TSS_015392 | 1000 | 119    | 0 | 0 I   | within gene(s) PMM0207;                                       |
| 199933 - | TSS_015396 | 1000 | 201    | 0 | 3 I   | within gene(s) PMM0207;                                       |
| 201442 + | TSS_001560 | 1000 | 3059   | 0 | 4 P   | 14nt upstream of gene PMM0208;                                |
| 203219 - | TSS_015418 | 1000 | 421    | 0 | 0 I   | within gene(s) PMM0209;                                       |
| 203802 - | TSS_015422 | 1000 | 218    | 0 | 0 I   | within gene(s) PMM0209;                                       |
| 204777 - | TSS_015424 | 1000 | 121    | 0 | 5 P   | 41nt upstream of gene PMM0210;                                |
| 204910 + | TSS_001617 | 1000 | 1103   | 0 | 4 P   | 82nt upstream of gene PMM0211;                                |
| 205032 + | TSS_001621 | 1000 | 92     | 0 | 0 I   | within gene(s) PMM0211;                                       |
| 205343 + | TSS_001635 | 1000 | 92     | 0 | 11 I  | within gene(s) PMM0211;                                       |
| 205900 - | TSS_015439 | 1000 | 1470   | 0 | 1 Ai  | antisense to gene(s) PMM0211;                                 |
| 206424 - | TSS_015441 | 1000 | 1996   | 0 | 2 IP  | within gene(s) PMM0213; 172nt upstream of gene PMM0212;       |
| 207728 - | TSS_015450 | 1000 | 179    | 0 | 0 I   | within gene(s) PMM0214;                                       |
| 207839 - | TSS_015451 | 1000 | 70     | 0 | 0 I   | within gene(s) PMM0214;                                       |
| 208944 - | TSS_015460 | 1000 | 386    | 0 | 0 P   | 28nt upstream of gene PMM0214;                                |
| 209113 + | TSS_001659 | 1000 | 79     | 0 | 1 P   | 31nt upstream of gene PMM0215;                                |
| 210185 + | TSS_001662 | 1000 | 121    | 0 | 1 P   | 16nt upstream of gene PMM0216;                                |
| 211988 - | TSS_015463 | 1000 | 968    | 0 | 2 Ai  | antisense to gene(s) PMM0217;                                 |
| 212045 + | TSS_001665 | 1000 | 53     | 0 | 1 I   | within gene(s) PMM0217;                                       |
| 212245 + | TSS_001668 | 1000 | 66     | 0 | 0 I   | within gene(s) PMM0217;                                       |
| 212936 - | TSS_015465 | 1000 | 91     | 0 | 0 Ai  | antisense to gene(s) PMM0217;                                 |
| 213029 + | TSS_001673 | 1000 | 570    | 0 | 2 P   | 33nt upstream of gene PMM0218;                                |
| 214116 + | TSS_001681 | 1000 | 1274   | 0 | 2 P   | 17nt upstream of gene PMM0219;                                |
| 214675 - | TSS_015472 | 1000 | 11989  | 0 | 3 P   | 19nt upstream of gene PMM0220;                                |
| 215929 + | TSS_001685 | 1000 | 82     | 0 | 0 I   | within gene(s) PMM0222;                                       |
| 216078 + | TSS_001686 | 1000 | 408    | 0 | 0 I   | within gene(s) PMM0222;                                       |
| 216745 + | TSS_001696 | 1000 | 560094 | 0 | 7 P   | 62nt upstream of gene PMM0223;                                |
| 216760 + | TSS_001698 | 1000 | 0      | 0 | 0 P   | 47nt upstream of gene PMM0223;                                |
| 217197 + | TSS_001906 | 1000 | 13390  | 0 | 135 I | within gene(s) PMM0223;                                       |
| 217978 + | TSS_002190 | 1000 | 3125   | 0 | 3 P   | 24nt upstream of gene PMM0224;                                |
| 218599 + | TSS_002225 | 1000 | 386    | 0 | 30 I  | within gene(s) PMM0224;                                       |
| 219845 + | TSS_002253 | 1000 | 707    | 0 | 1 Ai  | antisense to gene(s) PMM0226;                                 |
| 219897 - | TSS_015514 | 1000 | 17     | 0 | 0 IP  | within gene(s) PMM0226; 149nt upstream of gene PMM0225;       |
| 220009 + | TSS_002255 | 1000 | 603    | 0 | 0 Ai  | antisense to gene(s) PMM0226;                                 |
| 220578 - | TSS_015598 | 1000 | 481    | 0 | 15 I  | within gene(s) PMM0226;                                       |
| 221632 - | TSS_015707 | 1000 | 2678   | 0 | 3 P   | 24nt upstream of gene PMM0226;                                |
| 221652 + | TSS_002275 | 1000 | 71     | 0 | 0 Ad  | antisense to gene(s) PMM0227 (12nt downstream);               |
| 221701 + | TSS_002276 | 1000 | 289    | 0 | 0 Ai  | antisense to gene(s) PMM0227;                                 |
| 221978 + | TSS_002277 | 1000 | 112    | 0 | 0 Ai  | antisense to gene(s) PMM0227;                                 |
| 223706 - | TSS_015742 | 1000 | 1129   | 0 | 1 I   | within gene(s) PMM0228;                                       |
| 223847 - | TSS_015744 | 1000 | 224    | 0 | 1 P   | 140nt upstream of gene PMM0228;                               |
| 225576 + | TSS_002284 | 1000 | 1686   | 0 | 0 P   | 14nt upstream of gene PMM0231;                                |
| 225783 + | TSS_002288 | 1000 | 293    | 0 | 0 P   | 26nt upstream of gene PMM0232;                                |
| 227265 - | TSS_015753 | 1000 | 116    | 0 | 0 IP  | within gene(s) PMM0234; 96nt upstream of gene PMM0233;        |
| 227959 + | TSS_002292 | 1000 | 891    | 0 | 0 P   | 28nt upstream of gene PMM0235;                                |
| 228037 + | TSS_002293 | 1000 | 163    | 0 | 0 I   | within gene(s) PMM0235;                                       |
| 229314 - | TSS_015770 | 1000 | 284    | 0 | 0 O   | -                                                             |
| 229472 + | TSS_002309 | 1000 | 69     | 0 | 2 P   | 167nt upstream of gene PMM0237;                               |
| 230878 - | TSS_015775 | 1000 | 320    | 0 | 5 Ai  | antisense to gene(s) PMM0238;                                 |
| 232150 + | TSS_002332 | 1000 | 62     | 0 | 0 I   | within gene(s) PMM0238;                                       |
| 232913 - | TSS_015782 | 1000 | 91     | 0 | 0 Ai  | antisense to gene(s) PMM0238;                                 |
| 237520 - | TSS_015811 | 1000 | 751    | 0 | 15 IP | within gene(s) PMM0244; 196nt upstream of gene PMM0243;       |
| 237737 - | TSS_015823 | 1000 | 393    | 0 | 4 I   | within gene(s) PMM0244;                                       |
| 237987 - | TSS_015826 | 1000 | 122    | 0 | 4 IP  | within gene(s) PMM0245; 68nt upstream of gene PMM0244;        |
| 238520 - | TSS_015839 | 1000 | 1471   | 0 | 2 P   | 20nt upstream of gene PMM0245;                                |
| 238693 + | TSS_002343 | 1000 | 2431   | 0 | 4 P   | 12nt upstream of gene PMM0246;                                |
| 239672 - | TSS_015845 | 1000 | 204    | 0 | 4 Ai  | antisense to gene(s) PMM0247;                                 |
| 241176 - | TSS_015848 | 1000 | 306    | 0 | 3 IP  | within gene(s) PMM0250; 35nt upstream of gene PMM0249;        |
| 242059 + | TSS_002350 | 1000 | 200    | 0 | 0 PAi | 162nt upstream of gene PMM0252; antisense to gene(s) PMM0251; |
| 242165 - | TSS_015853 | 1000 | 121    | 0 | 4 P   | 24nt upstream of gene PMM0251;                                |
| 242185 + | TSS_002352 | 1000 | 2370   | 0 | 2 P   | 36nt upstream of gene PMM0252;                                |
| 242483 + | TSS_002357 | 1000 | 388    | 0 | 0 P   | 19nt upstream of gene PMM0253;                                |
| 244978 + | TSS_002362 | 1000 | 253    | 0 | 4 Ai  | antisense to gene(s) PMM0255;                                 |
| 245524 - | TSS_015860 | 1000 | 878    | 0 | 11 IP | within gene(s) PMM0256; 219nt upstream of gene PMM0255;       |
| 245888 - | TSS_015867 | 1000 | 354    | 0 | 2 I   | within gene(s) PMM0256;                                       |
| 246248 + | TSS_002366 | 1000 | 4629   | 0 | 4 Ai  | antisense to gene(s) PMM0256;                                 |
| 246731 - | TSS_015870 | 1000 | 898    | 0 | 1 IP  | within gene(s) PMM0257; 20nt upstream of gene PMM0256;        |

|          |            |      |        |   |    |     |                                                               |
|----------|------------|------|--------|---|----|-----|---------------------------------------------------------------|
| 248216 - | TSS_015880 | 1000 | 345    | 0 | 18 | IP  | within gene(s) PMM0258; 190nt upstream of gene PMM0257;       |
| 249242 - | TSS_015984 | 1000 | 1558   | 0 | 2  | I   | within gene(s) PMM0258;                                       |
| 249485 + | TSS_002385 | 1000 | 152    | 0 | 2  | P   | 22nt upstream of gene PMM0259;                                |
| 251358 + | TSS_002391 | 1000 | 172    | 0 | 3  | Ai  | antisense to gene(s) PMM0261;                                 |
| 252586 + | TSS_002398 | 1000 | 798562 | 0 | 8  | P   | 46nt upstream of gene PMM0263;                                |
| 252875 + | TSS_002439 | 1000 | 5646   | 0 | 9  | I   | within gene(s) PMM0263;                                       |
| 253072 + | TSS_002460 | 1000 | 9359   | 0 | 0  | I   | within gene(s) PMM0263;                                       |
| 254055 - | TSS_016021 | 1000 | 509    | 0 | 0  | Ai  | antisense to gene(s) PMM0263;                                 |
| 254181 + | TSS_002563 | 1000 | 111    | 0 | 4  | P   | 1nt upstream of gene PMM0264;                                 |
| 255509 + | TSS_002566 | 1000 | 157    | 0 | 1  | I   | within gene(s) PMM0265;                                       |
| 258382 + | TSS_002605 | 1000 | 147    | 0 | 0  | Ai  | antisense to gene(s) PMM0268;                                 |
| 258478 - | TSS_016059 | 1000 | 241    | 0 | 30 | I   | within gene(s) PMM0268;                                       |
| 258539 + | TSS_002606 | 1000 | 521    | 0 | 0  | Ai  | antisense to gene(s) PMM0268;                                 |
| 258616 - | TSS_016075 | 1000 | 218    | 0 | 2  | P   | 12nt upstream of gene PMM0268;                                |
| 261925 + | TSS_002620 | 1000 | 391    | 0 | 0  | P   | 23nt upstream of gene PMM0272;                                |
| 263543 + | TSS_002624 | 1000 | 460    | 0 | 0  | Ai  | antisense to gene(s) PMM0274;                                 |
| 264013 + | TSS_002625 | 1000 | 101    | 0 | 0  | Ai  | antisense to gene(s) PMM0274;                                 |
| 264640 + | TSS_002627 | 1000 | 72     | 0 | 2  | P   | 18nt upstream of gene PMM0275;                                |
| 268849 + | TSS_002639 | 1000 | 121    | 0 | 0  | IP  | within gene(s) PMM0278; 175nt upstream of gene PMM0279;       |
| 269162 + | TSS_002643 | 1000 | 735    | 0 | 2  | I   | within gene(s) PMM0279;                                       |
| 271937 - | TSS_016138 | 1000 | 550    | 0 | 0  | IP  | within gene(s) PMM0282; 173nt upstream of gene PMM0281;       |
| 272594 - | TSS_016154 | 1000 | 698    | 0 | 1  | P   | 27nt upstream of gene PMM0282;                                |
| 273322 + | TSS_002655 | 1000 | 103    | 0 | 3  | I   | within gene(s) PMM0284;                                       |
| 274872 - | TSS_016158 | 1000 | 206    | 0 | 0  | I   | within gene(s) PMM0285;                                       |
| 274917 + | TSS_002658 | 1000 | 127    | 0 | 0  | Ai  | antisense to gene(s) PMM0285;                                 |
| 280333 - | TSS_016170 | 1000 | 1512   | 0 | 1  | IP  | within gene(s) PMM0290; 149nt upstream of gene PMM0289;       |
| 283519 - | TSS_016216 | 1000 | 436    | 0 | 13 | I   | within gene(s) PMM0293;                                       |
| 283811 - | TSS_016241 | 1000 | 3629   | 0 | 0  | IP  | within gene(s) PMM0294; 52nt upstream of gene PMM0293;        |
| 283904 - | TSS_016246 | 1000 | 5625   | 0 | 4  | IP  | within gene(s) PMM0294; 145nt upstream of gene PMM0293;       |
| 284179 - | TSS_016253 | 1000 | 1769   | 0 | 10 | P   | 53nt upstream of gene PMM0294;                                |
| 284302 - | TSS_016259 | 1000 | 4763   | 0 | 2  | Pai | 176nt upstream of gene PMM0294; antisense to gene(s) PMM0295; |
| 284638 + | TSS_002694 | 1000 | 416    | 0 | 0  | I   | within gene(s) PMM0296;                                       |
| 284851 + | TSS_002699 | 1000 | 292    | 0 | 7  | I   | within gene(s) PMM0296;                                       |
| 285370 + | TSS_002713 | 1000 | 119    | 0 | 0  | I   | within gene(s) PMM0296;                                       |
| 285545 - | TSS_016265 | 1000 | 150    | 0 | 1  | Ai  | antisense to gene(s) PMM0296;                                 |
| 285768 + | TSS_002716 | 1000 | 20709  | 0 | 2  | P   | 9nt upstream of gene PMM0297;                                 |
| 286195 + | TSS_002745 | 1000 | 768    | 0 | 9  | IP  | within gene(s) PMM0299; 123nt upstream of gene PMM0300;       |
| 286270 + | TSS_002755 | 1000 | 1312   | 0 | 7  | IP  | within gene(s) PMM0299; 48nt upstream of gene PMM0300;        |
| 286877 + | TSS_002770 | 1000 | 182    | 0 | 1  | Ai  | antisense to gene(s) PMM0301;                                 |
| 287552 - | TSS_016304 | 1000 | 1179   | 0 | 1  | Pai | 83nt upstream of gene PMM0301; antisense to gene(s) PMM0302;  |
| 287702 - | TSS_016306 | 1000 | 337    | 0 | 4  | Pai | 233nt upstream of gene PMM0301; antisense to gene(s) PMM0302; |
| 290102 + | TSS_002778 | 1000 | 202    | 0 | 0  | Ai  | antisense to gene(s) PMM0303;                                 |
| 290195 + | TSS_002779 | 1000 | 627    | 0 | 0  | Ai  | antisense to gene(s) PMM0303;                                 |
| 291317 - | TSS_016313 | 1000 | 319    | 0 | 0  | I   | within gene(s) PMM0304;                                       |
| 291416 - | TSS_016314 | 1000 | 134    | 0 | 0  | I   | within gene(s) PMM0304;                                       |
| 292892 - | TSS_016319 | 1000 | 115    | 0 | 5  | I   | within gene(s) PMM0304;                                       |
| 293682 + | TSS_002782 | 1000 | 247    | 0 | 3  | P   | 28nt upstream of gene PMM0305;                                |
| 294128 - | TSS_016323 | 1000 | 469    | 0 | 1  | Ai  | antisense to gene(s) PMM0305;                                 |
| 294947 - | TSS_016326 | 1000 | 71     | 0 | 1  | P   | 21nt upstream of gene PMM0307;                                |
| 299042 - | TSS_016344 | 1000 | 1190   | 0 | 5  | P   | 18nt upstream of gene PMM0311;                                |
| 299836 - | TSS_016360 | 1000 | 249    | 0 | 0  | I   | within gene(s) PMM0312;                                       |
| 299950 - | TSS_016361 | 1000 | 219    | 0 | 0  | I   | within gene(s) PMM0312;                                       |
| 300325 - | TSS_016364 | 1000 | 550    | 0 | 9  | P   | 75nt upstream of gene PMM0312;                                |
| 300858 - | TSS_016373 | 1000 | 4552   | 0 | 7  | P   | 21nt upstream of gene PMM0313;                                |
| 301023 + | TSS_002803 | 1000 | 1218   | 0 | 0  | Ai  | antisense to gene(s) PMM0314;                                 |
| 302590 - | TSS_016519 | 1000 | 388    | 0 | 2  | P   | 3nt upstream of gene PMM0315;                                 |
| 303256 + | TSS_002835 | 1000 | 702    | 0 | 12 | P   | 24nt upstream of gene PMM0317;                                |
| 305442 - | TSS_016534 | 1000 | 144    | 0 | 0  | I   | within gene(s) PMM0320;                                       |
| 305727 - | TSS_016550 | 1000 | 1582   | 0 | 7  | IP  | within gene(s) PMM0321; 174nt upstream of gene PMM0320;       |
| 306125 - | TSS_016557 | 1000 | 128    | 0 | 0  | I   | within gene(s) PMM0321;                                       |
| 306386 - | TSS_016559 | 1000 | 941    | 0 | 2  | P   | 15nt upstream of gene PMM0321;                                |
| 308758 + | TSS_002853 | 1000 | 14712  | 0 | 3  | Ai  | antisense to gene(s) PMM0324;                                 |
| 309008 + | TSS_002859 | 1000 | 246    | 0 | 0  | Ai  | antisense to gene(s) PMM0324;                                 |
| 309757 - | TSS_016603 | 1000 | 315    | 0 | 0  | P   | 22nt upstream of gene PMM0324;                                |
| 309786 + | TSS_002869 | 1000 | 16768  | 0 | 3  | P   | 20nt upstream of gene PMM0325;                                |
| 309929 - | TSS_016606 | 1000 | 4570   | 0 | 2  | Pai | 194nt upstream of gene PMM0324; antisense to gene(s) PMM0325; |
| 310023 + | TSS_002878 | 1000 | 1004   | 0 | 0  | I   | within gene(s) PMM0325;                                       |
| 310271 + | TSS_002892 | 1000 | 473    | 0 | 7  | IP  | within gene(s) PMM0325; 234nt upstream of gene PMM0326;       |
| 310480 + | TSS_002901 | 1000 | 400    | 0 | 2  | P   | 25nt upstream of gene PMM0326;                                |
| 310880 + | TSS_002942 | 1000 | 287    | 0 | 12 | I   | within gene(s) PMM0326;                                       |
| 312446 - | TSS_016674 | 1000 | 2808   | 0 | 3  | P   | 16nt upstream of gene PMM0327;                                |
| 312554 + | TSS_002964 | 1000 | 1830   | 0 | 0  | O   | -                                                             |
| 312729 + | TSS_002977 | 1000 | 367    | 0 | 10 | O   | -                                                             |
| 312873 - | TSS_016677 | 1000 | 814    | 0 | 1  | O   | -                                                             |
| 313374 - | TSS_016694 | 1000 | 612    | 0 | 1  | O   | -                                                             |
| 313535 - | TSS_016699 | 1000 | 1908   | 0 | 7  | O   | -                                                             |
| 313616 - | TSS_016704 | 1000 | 403    | 0 | 3  | O   | -                                                             |
| 314130 + | TSS_003195 | 1000 | 0      | 0 | 4  | O   | -                                                             |
| 314529 - | TSS_016731 | 1000 | 3194   | 0 | 3  | O   | -                                                             |
| 314959 + | TSS_003214 | 1000 | 1061   | 0 | 0  | O   | -                                                             |

|          |            |      |       |   |      |                                                         |
|----------|------------|------|-------|---|------|---------------------------------------------------------|
| 315080 + | TSS_003215 | 1000 |       | 0 | 12 O | -                                                       |
| 315599 - | TSS_016750 | 1000 | 138   | 0 | 0 O  | -                                                       |
| 315908 - | TSS_016759 | 1000 | 637   | 0 | 8 O  | -                                                       |
| 316065 - | TSS_016765 | 1000 | 693   | 0 | 6 O  | -                                                       |
| 316220 - | TSS_016771 | 1000 | 1403  | 0 | 4 O  | -                                                       |
| 316340 - | TSS_016772 | 1000 | 596   | 0 | 3 O  | -                                                       |
| 318015 - | TSS_016830 | 1000 |       | 0 | 4 O  | -                                                       |
| 319267 - | TSS_016834 | 1000 | 671   | 0 | 0 P  | 0nt upstream of gene PMM0329;                           |
| 320607 + | TSS_003854 | 1000 | 92    | 0 | 0 Ai | antisense to gene(s) PMM0331;                           |
| 322362 + | TSS_003856 | 1000 | 413   | 0 | 5 P  | 0nt upstream of gene PMM0333;                           |
| 322674 + | TSS_003860 | 1000 | 110   | 0 | 0 I  | within gene(s) PMM0333;                                 |
| 323620 - | TSS_016852 | 1000 | 1647  | 0 | 5 P  | 21nt upstream of gene PMM0334;                          |
| 324251 - | TSS_016854 | 1000 | 1009  | 0 | 0 O  | -                                                       |
| 324470 - | TSS_016855 | 1000 | 105   | 0 | 0 O  | -                                                       |
| 324964 + | TSS_003870 | 1000 | 3029  | 0 | 1 I  | within gene(s) PMM0335;                                 |
| 325557 - | TSS_016942 | 1000 | 69441 | 0 | 0 P  | 15nt upstream of gene PMM0336;                          |
| 326449 - | TSS_016972 | 1000 | 1024  | 0 | 1 P  | 15nt upstream of gene PMM0337;                          |
| 326712 + | TSS_003888 | 1000 | 2285  | 0 | 2 O  | -                                                       |
| 327570 - | TSS_016992 | 1000 | 4937  | 0 | 2 O  | -                                                       |
| 327681 + | TSS_003901 | 1000 | 70    | 0 | 3 Ai | antisense to gene(s) PMM0339;                           |
| 328681 - | TSS_016997 | 1000 | 209   | 0 | 1 I  | within gene(s) PMM0339;                                 |
| 329348 - | TSS_017002 | 1000 | 1709  | 0 | 0 P  | 157nt upstream of gene PMM0339;                         |
| 330221 - | TSS_017006 | 1000 | 724   | 0 | 1 P  | 15nt upstream of gene PMM0341;                          |
| 330306 + | TSS_003911 | 1000 | 1911  | 0 | 2 P  | 35nt upstream of gene PMM0342;                          |
| 330978 - | TSS_017009 | 1000 | 626   | 0 | 3 O  | -                                                       |
| 333569 - | TSS_017029 | 1000 | 414   | 0 | 0 P  | 108nt upstream of gene PMM0347;                         |
| 333947 - | TSS_017032 | 1000 | 10530 | 0 | 2 P  | 20nt upstream of gene PMM0348;                          |
| 339021 + | TSS_003932 | 1000 | 288   | 0 | 1 P  | 18nt upstream of gene PMM0355;                          |
| 339316 - | TSS_017041 | 1000 | 273   | 0 | 0 Ai | antisense to gene(s) PMM0355;                           |
| 339953 + | TSS_003938 | 1000 | 15777 | 0 | 2 O  | -                                                       |
| 340175 - | TSS_017043 | 1000 | 141   | 0 | 2 O  | -                                                       |
| 340326 + | TSS_003940 | 1000 | 138   | 0 | 0 I  | within gene(s) PMM0356;                                 |
| 342272 + | TSS_003945 | 1000 | 84    | 0 | 0 I  | within gene(s) PMM0358;                                 |
| 343318 - | TSS_017051 | 1000 | 107   | 0 | 5 P  | 49nt upstream of gene PMM0359;                          |
| 343464 + | TSS_003948 | 1000 | 113   | 0 | 4 O  | -                                                       |
| 345398 + | TSS_003958 | 1000 | 287   | 0 | 3 P  | 22nt upstream of gene PMM0363;                          |
| 346829 + | TSS_003963 | 1000 | 187   | 0 | 3 O  | -                                                       |
| 347280 + | TSS_003964 | 1000 | 29790 | 0 | 1 P  | 16nt upstream of gene PMM0364;                          |
| 347925 - | TSS_017062 | 1000 | 62    | 0 | 12 I | within gene(s) PMM0365;                                 |
| 348066 - | TSS_011864 | 1000 | 8542  | 0 | 1 P  | 21nt upstream of gene PMM0365;                          |
| 348397 + | TSS_003997 | 1000 | 302   | 0 | 1 I  | within gene(s) PMM0366;                                 |
| 348935 + | TSS_004006 | 1000 | 403   | 0 | 1 P  | 33nt upstream of gene PMM0367;                          |
| 349333 - | TSS_017072 | 1000 | 255   | 0 | 3 Ai | antisense to gene(s) PMM0367;                           |
| 349634 - | TSS_017084 | 1000 | 614   | 0 | 0 I  | within gene(s) PMM0368;                                 |
| 349673 - | TSS_017086 | 1000 | 125   | 0 | 0 I  | within gene(s) PMM0368;                                 |
| 349709 - | TSS_011873 | 1000 | 3487  | 0 | 1 P  | 18nt upstream of gene PMM0368;                          |
| 350069 - | TSS_017087 | 1000 | 827   | 0 | 0 O  | -                                                       |
| 350388 + | TSS_004009 | 1000 | 321   | 0 | 1 O  | -                                                       |
| 350523 - | TSS_017092 | 1000 | 59488 | 0 | 4 O  | -                                                       |
| 351169 - | TSS_017097 | 1000 | 7094  | 0 | 6 O  | -                                                       |
| 352103 - | TSS_017108 | 1000 | 457   | 0 | 2 O  | -                                                       |
| 352188 + | TSS_004014 | 1000 | 2048  | 0 | 2 P  | 7nt upstream of gene PMM0369;                           |
| 352957 + | TSS_004017 | 1000 | 1387  | 0 | 1 P  | 18nt upstream of gene PMM0370;                          |
| 353381 + | TSS_004069 | 1000 | 455   | 0 | 15 I | within gene(s) PMM0370;                                 |
| 354391 + | TSS_004218 | 1000 | 906   | 0 | 69 I | within gene(s) PMM0370;                                 |
| 355246 + | TSS_004267 | 1000 | 115   | 0 | 3 IP | within gene(s) PMM0371; 244nt upstream of gene PMM0372; |
| 355412 - | TSS_017130 | 1000 | 404   | 0 | 0 Ai | antisense to gene(s) PMM0371;                           |
| 356326 + | TSS_004280 | 1000 | 473   | 0 | 3 IP | within gene(s) PMM0372; 51nt upstream of gene PMM0373;  |
| 358183 - | TSS_017137 | 1000 | 1490  | 0 | 2 P  | 16nt upstream of gene PMM0377;                          |
| 358512 - | TSS_017147 | 1000 | 24265 | 0 | 2 P  | 22nt upstream of gene PMM0378;                          |
| 358753 - | TSS_017150 | 1000 | 1589  | 0 | 2 O  | -                                                       |
| 359627 - | TSS_017152 | 1000 | 877   | 0 | 0 O  | -                                                       |
| 359991 - | TSS_017158 | 1000 | 1461  | 0 | 3 P  | 20nt upstream of gene PMM0379;                          |
| 361663 + | TSS_004299 | 1000 | 145   | 0 | 0 O  | -                                                       |
| 362873 - | TSS_017167 | 1000 | 1659  | 0 | 4 P  | 140nt upstream of gene PMM0383;                         |
| 366037 - | TSS_017185 | 1000 | 143   | 0 | 9 O  | -                                                       |
| 366442 - | TSS_017199 | 1000 | 415   | 0 | 10 O | -                                                       |
| 366522 - | TSS_017205 | 1000 | 2507  | 0 | 4 O  | -                                                       |
| 367091 - | TSS_017210 | 1000 | 317   | 0 | 3 I  | within gene(s) PMM0386;                                 |
| 367935 - | TSS_017212 | 1000 | 546   | 0 | 0 O  | -                                                       |
| 368274 + | TSS_004318 | 1000 | 1094  | 0 | 2 O  | -                                                       |
| 368596 + | TSS_004321 | 1000 | 117   | 0 | 5 P  | 17nt upstream of gene PMM0387;                          |
| 370557 + | TSS_004328 | 1000 | 72    | 0 | 0 I  | within gene(s) PMM0390;                                 |
| 370969 + | TSS_004331 | 1000 | 3175  | 0 | 3 P  | 24nt upstream of gene PMM0391;                          |
| 373282 + | TSS_004339 | 1000 | 65    | 0 | 1 IP | within gene(s) PMM0392; 19nt upstream of gene PMM0393;  |
| 374217 - | TSS_017226 | 1000 | 106   | 0 | 4 Ad | antisense to gene(s) PMM0394 (9nt downstream);          |
| 374270 + | TSS_004341 | 1000 | 1398  | 0 | 0 P  | 97nt upstream of gene PMM0395;                          |
| 376301 - | TSS_017243 | 1000 | 151   | 0 | 0 I  | within gene(s) PMM0397;                                 |
| 380710 - | TSS_017253 | 1000 | 161   | 0 | 0 Ai | antisense to gene(s) PMM0402;                           |
| 381726 + | TSS_004440 | 1000 | 1644  | 0 | 1 P  | 14nt upstream of gene PMM0403;                          |

|          |            |      |       |   |       |                                                                         |
|----------|------------|------|-------|---|-------|-------------------------------------------------------------------------|
| 382963 + | TSS_004445 | 1000 | 117   | 0 | 1 O   | -                                                                       |
| 383390 + | TSS_004447 | 1000 | 151   | 0 | 0 O   | -                                                                       |
| 383585 + | TSS_004450 | 1000 | 7649  | 0 | 4 P   | 85nt upstream of gene PMM0405;                                          |
| 383961 + | TSS_004480 | 1000 | 109   | 0 | 21 I  | within gene(s) PMM0405;                                                 |
| 384035 - | TSS_017259 | 1000 | 320   | 0 | 1 Ai  | antisense to gene(s) PMM0405;                                           |
| 384144 + | TSS_004505 | 1000 | 211   | 0 | 33 I  | within gene(s) PMM0405;                                                 |
| 384519 + | TSS_004541 | 1000 | 404   | 0 | 15 I  | within gene(s) PMM0405;                                                 |
| 384720 + | TSS_004566 | 1000 | 343   | 0 | 15 I  | within gene(s) PMM0405;                                                 |
| 385716 + | TSS_004579 | 1000 | 191   | 0 | 0 I   | within gene(s) PMM0406;                                                 |
| 386603 + | TSS_004593 | 1000 | 2651  | 0 | 1 Ai  | antisense to gene(s) PMM0407;                                           |
| 386764 - | TSS_017359 | 1000 | 2019  | 0 | 144 I | within gene(s) PMM0407;                                                 |
| 387174 - | TSS_017436 | 1000 | 45887 | 0 | 7 P   | 17nt upstream of gene PMM0407;                                          |
| 390631 + | TSS_004617 | 1000 | 196   | 0 | 3 P   | 26nt upstream of gene PMM0411;                                          |
| 390633 - | TSS_017453 | 1000 | 1221  | 0 | 2 P   | 72nt upstream of gene PMM0410;                                          |
| 392813 + | TSS_004623 | 1000 | 393   | 0 | 1 P   | 15nt upstream of gene PMM0414;                                          |
| 395057 + | TSS_004624 | 1000 | 96    | 0 | 0 Ai  | antisense to gene(s) PMM0416;                                           |
| 395539 - | TSS_017466 | 1000 | 1138  | 0 | 2 P   | 16nt upstream of gene PMM0416;                                          |
| 395864 - | TSS_017469 | 1000 | 1717  | 0 | 5 O   | -                                                                       |
| 396587 + | TSS_004627 | 1000 | 215   | 0 | 6 P   | 42nt upstream of gene PMM0419;                                          |
| 398147 + | TSS_004634 | 1000 | 720   | 0 | 1 P   | 32nt upstream of gene PMM0420;                                          |
| 398719 + | TSS_004637 | 1000 | 366   | 0 | 3 I   | within gene(s) PMM0420;                                                 |
| 401612 - | TSS_017482 | 1000 | 483   | 0 | 0 P   | 18nt upstream of gene PMM0422;                                          |
| 401747 + | TSS_004646 | 1000 | 3164  | 0 | 3 O   | -                                                                       |
| 401864 - | TSS_017485 | 1000 | 129   | 0 | 1 O   | -                                                                       |
| 402007 - | TSS_017486 | 1000 | 176   | 0 | 0 O   | -                                                                       |
| 405868 - | TSS_017489 | 1000 | 79    | 0 | 0 Ai  | antisense to gene(s) PMM0426;                                           |
| 409562 - | TSS_017499 | 1000 | 135   | 0 | 0 Ai  | antisense to gene(s) PMM0430;                                           |
| 409694 + | TSS_004663 | 1000 | 71    | 0 | 0 I   | within gene(s) PMM0430;                                                 |
| 412572 - | TSS_017504 | 1000 | 104   | 0 | 0 I   | within gene(s) PMM0434;                                                 |
| 412935 + | TSS_004667 | 1000 | 132   | 0 | 6 Ai  | antisense to gene(s) PMM0435;                                           |
| 413484 + | TSS_004670 | 1000 | 667   | 0 | 3 Ai  | antisense to gene(s) PMM0435;                                           |
| 414359 - | TSS_017521 | 1000 | 448   | 0 | 1 P   | 44nt upstream of gene PMM0435;                                          |
| 414382 + | TSS_004676 | 1000 | 787   | 0 | 2 P   | 102nt upstream of gene PMM0436;                                         |
| 421671 - | TSS_017536 | 1000 | 96    | 0 | 0 P   | 22nt upstream of gene PMM0441;                                          |
| 422795 - | TSS_017541 | 1000 | 725   | 0 | 6 P   | 16nt upstream of gene PMM0443;                                          |
| 423280 + | TSS_004740 | 1000 | 116   | 0 | 2 Ai  | antisense to gene(s) PMM0444;                                           |
| 423635 - | TSS_017555 | 1000 | 194   | 0 | 12 IP | within gene(s) PMM0445; 156nt upstream of gene PMM0444;                 |
| 423797 - | TSS_017564 | 1000 | 331   | 0 | 6 I   | within gene(s) PMM0445;                                                 |
| 423944 - | TSS_017574 | 1000 | 396   | 0 | 6 I   | within gene(s) PMM0445;                                                 |
| 424706 - | TSS_017605 | 1000 | 527   | 0 | 6 I   | within gene(s) PMM0445;                                                 |
| 424790 - | TSS_017612 | 1000 | 676   | 0 | 18 I  | within gene(s) PMM0445;                                                 |
| 424880 - | TSS_017622 | 1000 | 1458  | 0 | 5 I   | within gene(s) PMM0445;                                                 |
| 425395 - | TSS_017647 | 1000 | 547   | 0 | 0 I   | within gene(s) PMM0446;                                                 |
| 425629 - | TSS_017668 | 1000 | 169   | 0 | 3 I   | within gene(s) PMM0446;                                                 |
| 426162 + | TSS_004762 | 1000 | 2722  | 0 | 4 P   | 8nt upstream of gene PMM0447;                                           |
| 426441 - | TSS_017675 | 1000 | 116   | 0 | 0 Ai  | antisense to gene(s) PMM0447;                                           |
| 427201 + | TSS_004793 | 1000 | 589   | 0 | 30 I  | within gene(s) PMM0448;                                                 |
| 427279 + | TSS_004800 | 1000 | 674   | 0 | 6 I   | within gene(s) PMM0448;                                                 |
| 427558 + | TSS_004812 | 1000 | 551   | 0 | 3 I   | within gene(s) PMM0448;                                                 |
| 429988 - | TSS_017690 | 1000 | 302   | 0 | 1 Ai  | antisense to gene(s) PMM0450;                                           |
| 430126 + | TSS_004848 | 1000 | 366   | 0 | 0 I   | within gene(s) PMM0451;                                                 |
| 430534 + | TSS_004856 | 1000 | 94    | 0 | 5 IAd | within gene(s) PMM0451; antisense to gene(s) PMM0452 (23nt downstream); |
| 431182 - | TSS_017698 | 1000 | 92    | 0 | 23 I  | within gene(s) PMM0452;                                                 |
| 432317 - | TSS_017777 | 1000 | 6334  | 0 | 9 P   | 16nt upstream of gene PMM0452;                                          |
| 432436 + | TSS_004874 | 1000 | 211   | 0 | 0 O   | -                                                                       |
| 433437 + | TSS_004878 | 1000 | 171   | 0 | 0 P   | 21nt upstream of gene PMM0454;                                          |
| 433897 + | TSS_004880 | 1000 | 79    | 0 | 2 I   | within gene(s) PMM0454;                                                 |
| 435917 - | TSS_017791 | 1000 | 293   | 0 | 0 P   | 19nt upstream of gene PMM0456;                                          |
| 440026 - | TSS_017803 | 1000 | 186   | 0 | 0 IP  | within gene(s) PMM0461; 221nt upstream of gene PMM0460;                 |
| 440888 - | TSS_017842 | 1000 | 96    | 0 | 6 IP  | within gene(s) PMM0462; 118nt upstream of gene PMM0461;                 |
| 441340 - | TSS_017857 | 1000 | 517   | 0 | 3 P   | 29nt upstream of gene PMM0462;                                          |
| 442840 - | TSS_017867 | 1000 | 2145  | 0 | 6 P   | 17nt upstream of gene PMM0465;                                          |
| 444471 + | TSS_004908 | 1000 | 171   | 0 | 1 PAi | 157nt upstream of gene PMM0467; antisense to gene(s) PMM0466;           |
| 444597 - | TSS_017873 | 1000 | 72    | 0 | 1 P   | 44nt upstream of gene PMM0466;                                          |
| 445961 - | TSS_017911 | 1000 | 4230  | 0 | 4 P   | 42nt upstream of gene PMM0469;                                          |
| 445980 + | TSS_004916 | 1000 | 241   | 0 | 1 P   | 14nt upstream of gene PMM0470;                                          |
| 446903 + | TSS_004926 | 1000 | 107   | 0 | 0 IP  | within gene(s) PMM0470; 167nt upstream of gene PMM0471;                 |
| 447381 + | TSS_004931 | 1000 | 969   | 0 | 5 P   | 29nt upstream of gene PMM0472;                                          |
| 449593 - | TSS_017921 | 1000 | 93    | 0 | 1 I   | within gene(s) PMM0473;                                                 |
| 450716 - | TSS_017932 | 1000 | 1580  | 0 | 3 IP  | within gene(s) PMM0475; 235nt upstream of gene PMM0474;                 |
| 450998 + | TSS_004946 | 1000 | 486   | 0 | 1 Ai  | antisense to gene(s) PMM0475;                                           |
| 451134 - | TSS_017945 | 1000 | 1183  | 0 | 8 P   | 4nt upstream of gene PMM0475;                                           |
| 451442 + | TSS_004950 | 1000 | 186   | 0 | 4 PAi | 101nt upstream of gene PMM0477; antisense to gene(s) PMM0476;           |
| 452132 + | TSS_005032 | 1000 | 9282  | 0 | 8 I   | within gene(s) PMM0477;                                                 |
| 453247 + | TSS_005035 | 1000 | 348   | 0 | 0 P   | 22nt upstream of gene PMM0479;                                          |
| 454387 + | TSS_002819 | 1000 | 2574  | 0 | 3 P   | 17nt upstream of gene PMM0480;                                          |
| 455492 + | TSS_005063 | 1000 | 224   | 0 | 0 O   | -                                                                       |
| 455674 - | TSS_017972 | 1000 | 101   | 0 | 4 O   | -                                                                       |
| 456313 + | TSS_005137 | 1000 | 441   | 0 | 60 I  | within gene(s) PMM0482;                                                 |
| 456940 + | TSS_005165 | 1000 | 356   | 0 | 3 Ai  | antisense to gene(s) PMM0483;                                           |

|          |            |      |      |   |       |                                                               |
|----------|------------|------|------|---|-------|---------------------------------------------------------------|
| 457405 + | TSS_005168 | 1000 | 147  | 0 | 1 Ai  | antisense to gene(s) PMM0483;                                 |
| 457755 - | TSS_017991 | 1000 | 163  | 0 | 0 I   | within gene(s) PMM0483;                                       |
| 457975 - | TSS_017993 | 1000 | 287  | 0 | 3 P   | 36nt upstream of gene PMM0483;                                |
| 461083 + | TSS_005180 | 1000 | 99   | 0 | 0 IP  | within gene(s) PMM0487; 242nt upstream of gene PMM0488;       |
| 463104 + | TSS_005183 | 1000 | 109  | 0 | 0 Ai  | antisense to gene(s) PMM0489;                                 |
| 465270 - | TSS_018007 | 1000 | 167  | 0 | 0 IP  | within gene(s) PMM0492; 16nt upstream of gene PMM0491;        |
| 465840 + | TSS_005192 | 1000 | 669  | 0 | 3 P   | 16nt upstream of gene PMM0493;                                |
| 466192 + | TSS_005194 | 1000 | 497  | 0 | 1 I   | within gene(s) PMM0493;                                       |
| 467553 + | TSS_005207 | 1000 | 293  | 0 | 0 I   | within gene(s) PMM0494;                                       |
| 468497 - | TSS_018015 | 1000 | 900  | 0 | 7 I   | within gene(s) PMM0495;                                       |
| 469000 - | TSS_018021 | 1000 | 101  | 0 | 0 P   | 32nt upstream of gene PMM0495;                                |
| 470267 - | TSS_018060 | 1000 | 584  | 0 | 1 P   | 14nt upstream of gene PMM0496;                                |
| 474859 - | TSS_018075 | 1000 | 372  | 0 | 0 IP  | within gene(s) PMM0500; 37nt upstream of gene PMM0499;        |
| 475328 - | TSS_018081 | 1000 | 201  | 0 | 4 I   | within gene(s) PMM0500;                                       |
| 475534 - | TSS_018083 | 1000 | 115  | 0 | 0 PAi | 170nt upstream of gene PMM0500; antisense to gene(s) PMM0501; |
| 475685 + | TSS_005221 | 1000 | 753  | 0 | 10 Ai | antisense to gene(s) PMM0502;                                 |
| 475749 + | TSS_005227 | 1000 | 1664 | 0 | 3 Ai  | antisense to gene(s) PMM0502;                                 |
| 476045 - | TSS_018111 | 1000 | 1342 | 0 | 1 P   | 16nt upstream of gene PMM0502;                                |
| 476504 + | TSS_005228 | 1000 | 90   | 0 | 0 I   | within gene(s) PMM0503;                                       |
| 479540 - | TSS_018118 | 1000 | 211  | 0 | 2 P   | 24nt upstream of gene PMM0506;                                |
| 480066 - | TSS_018128 | 1000 | 207  | 0 | 3 IP  | within gene(s) PMM0508; 31nt upstream of gene PMM0507;        |
| 481882 - | TSS_018139 | 1000 | 241  | 0 | 1 P   | 18nt upstream of gene PMM0508;                                |
| 482442 + | TSS_005242 | 1000 | 206  | 0 | 0 P   | 36nt upstream of gene PMM0510;                                |
| 483044 - | TSS_018143 | 1000 | 745  | 0 | 2 Ai  | antisense to gene(s) PMM0511;                                 |
| 483868 + | TSS_005244 | 1000 | 99   | 0 | 1 I   | within gene(s) PMM0513;                                       |
| 486912 - | TSS_018149 | 1000 | 243  | 0 | 0 P   | 21nt upstream of gene PMM0515;                                |
| 487573 + | TSS_005252 | 1000 | 139  | 0 | 0 I   | within gene(s) PMM0516;                                       |
| 490430 + | TSS_005257 | 1000 | 162  | 0 | 3 I   | within gene(s) PMM0518;                                       |
| 490706 + | TSS_005262 | 1000 | 7561 | 0 | 0 P   | 20nt upstream of gene PMM0519;                                |
| 491260 + | TSS_005334 | 1000 | 1210 | 0 | 60 I  | within gene(s) PMM0519;                                       |
| 491974 - | TSS_018163 | 1000 | 175  | 0 | 0 I   | within gene(s) PMM0520;                                       |
| 493398 - | TSS_018172 | 1000 | 654  | 0 | 4 I   | within gene(s) PMM0521;                                       |
| 493513 - | TSS_018175 | 1000 | 153  | 0 | 0 IP  | within gene(s) PMM0522; 82nt upstream of gene PMM0521;        |
| 493630 + | TSS_005388 | 1000 | 176  | 0 | 3 Ai  | antisense to gene(s) PMM0522;                                 |
| 493996 - | TSS_018181 | 1000 | 210  | 0 | 4 I   | within gene(s) PMM0522;                                       |
| 494177 - | TSS_018185 | 1000 | 552  | 0 | 0 P   | 13nt upstream of gene PMM0522;                                |
| 494529 + | TSS_005392 | 1000 | 349  | 0 | 0 Ai  | antisense to gene(s) PMM0523;                                 |
| 495001 - | TSS_018191 | 1000 | 1099 | 0 | 8 P   | 12nt upstream of gene PMM0523;                                |
| 496211 + | TSS_005396 | 1000 | 464  | 0 | 0 P   | 44nt upstream of gene PMM0525;                                |
| 497254 + | TSS_005402 | 1000 | 315  | 0 | 6 I   | within gene(s) PMM0525;                                       |
| 497550 + | TSS_005405 | 1000 | 3916 | 0 | 2 P   | 15nt upstream of gene PMM0526;                                |
| 498249 + | TSS_005443 | 1000 | 206  | 0 | 27 I  | within gene(s) PMM0526;                                       |
| 498873 + | TSS_005478 | 1000 | 629  | 0 | 21 I  | within gene(s) PMM0526;                                       |
| 499089 + | TSS_005510 | 1000 | 465  | 0 | 41 I  | within gene(s) PMM0526;                                       |
| 502682 - | TSS_018233 | 1000 | 804  | 0 | 13 P  | 24nt upstream of gene PMM0530;                                |
| 503597 + | TSS_005527 | 1000 | 809  | 0 | 1 P   | 34nt upstream of gene PMM0532;                                |
| 504905 + | TSS_005585 | 1000 | 196  | 0 | 1 I   | within gene(s) PMM0533;                                       |
| 505257 - | TSS_018245 | 1000 | 110  | 0 | 0 Ai  | antisense to gene(s) PMM0533;                                 |
| 505261 + | TSS_005586 | 1000 | 117  | 0 | 0 IP  | within gene(s) PMM0533; 240nt upstream of gene PMM0534;       |
| 505757 + | TSS_005589 | 1000 | 418  | 0 | 0 I   | within gene(s) PMM0534;                                       |
| 507310 + | TSS_005596 | 1000 | 172  | 0 | 0 P   | 62nt upstream of gene PMM0536;                                |
| 508770 - | TSS_018249 | 1000 | 213  | 0 | 0 I   | within gene(s) PMM0537;                                       |
| 510847 + | TSS_005613 | 1000 | 113  | 0 | 2 P   | 19nt upstream of gene PMM0540;                                |
| 512559 + | TSS_005620 | 1000 | 193  | 0 | 0 Ai  | antisense to gene(s) PMM0543;                                 |
| 512853 + | TSS_005622 | 1000 | 5899 | 0 | 3 Ai  | antisense to gene(s) PMM0543;                                 |
| 513385 - | TSS_018316 | 1000 | 7121 | 0 | 5 P   | 24nt upstream of gene PMM0543;                                |
| 513547 + | TSS_005633 | 1000 | 294  | 0 | 0 Ad  | antisense to gene(s) PMM0544 (7nt downstream);                |
| 515373 - | TSS_018417 | 1000 | 251  | 0 | 36 IP | within gene(s) PMM0545; 240nt upstream of gene PMM0544;       |
| 516192 - | TSS_018506 | 1000 | 670  | 0 | 10 I  | within gene(s) PMM0545;                                       |
| 516813 - | TSS_018524 | 1000 | 205  | 0 | 5 I   | within gene(s) PMM0546;                                       |
| 516828 - | TSS_018528 | 1000 | 92   | 0 | 6 I   | within gene(s) PMM0546;                                       |
| 516846 - | TSS_018529 | 1000 | 62   | 0 | 0 I   | within gene(s) PMM0546;                                       |
| 516873 - | TSS_018530 | 1000 | 76   | 0 | 6 I   | within gene(s) PMM0546;                                       |
| 516933 - | TSS_018536 | 1000 | 0    | 0 | 13 P  | 15nt upstream of gene PMM0546;                                |
| 518485 - | TSS_018544 | 1000 | 216  | 0 | 0 P   | 102nt upstream of gene PMM0548;                               |
| 518681 + | TSS_005665 | 1000 | 1859 | 0 | 2 P   | 44nt upstream of gene PMM0549;                                |
| 519603 + | TSS_005671 | 1000 | 571  | 0 | 5 I   | within gene(s) PMM0550;                                       |
| 520384 - | TSS_018550 | 1000 | 500  | 0 | 1 Ai  | antisense to gene(s) PMM0550;                                 |
| 524032 - | TSS_018559 | 1000 | 134  | 0 | 2 Ai  | antisense to gene(s) PMM0553;                                 |
| 524269 - | TSS_018561 | 1000 | 155  | 0 | 0 Ai  | antisense to gene(s) PMM0553;                                 |
| 524632 - | TSS_018563 | 1000 | 4866 | 0 | 2 Ai  | antisense to gene(s) PMM0553;                                 |
| 524671 + | TSS_005696 | 1000 | 352  | 0 | 0 IP  | within gene(s) PMM0553; 191nt upstream of gene PMM0554;       |
| 524738 + | TSS_005697 | 1000 | 664  | 0 | 0 IP  | within gene(s) PMM0553; 124nt upstream of gene PMM0554;       |
| 525973 - | TSS_018570 | 1000 | 536  | 0 | 0 P   | 18nt upstream of gene PMM0557;                                |
| 526448 - | TSS_013314 | 1000 | 1876 | 0 | 2 P   | 15nt upstream of gene PMM0558;                                |
| 527254 + | TSS_005718 | 1000 | 477  | 0 | 6 I   | within gene(s) PMM0560;                                       |
| 528660 + | TSS_005728 | 1000 | 103  | 0 | 2 I   | within gene(s) PMM0561;                                       |
| 531701 + | TSS_005754 | 1000 | 346  | 0 | 4 P   | 15nt upstream of gene PMM0565;                                |
| 532356 - | TSS_018595 | 1000 | 493  | 0 | 1 Ai  | antisense to gene(s) PMM0565;                                 |
| 532769 + | TSS_005766 | 1000 | 165  | 0 | 3 I   | within gene(s) PMM0565;                                       |



|          |            |      |       |   |      |                                                         |
|----------|------------|------|-------|---|------|---------------------------------------------------------|
| 534371 + | TSS_005771 | 1000 | 172   | 0 | 2 P  | 6nt upstream of gene PMM0567;                           |
| 538166 + | TSS_005781 | 1000 | 975   | 0 | 2 P  | 179nt upstream of gene PMM0570;                         |
| 539279 - | TSS_018612 | 1000 | 182   | 0 | 3 Ai | antisense to gene(s) PMM0572;                           |
| 539865 + | TSS_005786 | 1000 | 403   | 0 | 0 Ad | antisense to gene(s) PMM0573 (15nt downstream);         |
| 539992 + | TSS_005787 | 1000 | 400   | 0 | 0 Ai | antisense to gene(s) PMM0573;                           |
| 540221 - | TSS_013363 | 1000 |       | 0 | 12 P | 97nt upstream of gene PMM0573;                          |
| 540317 - | TSS_018628 | 1000 | 107   | 0 | 0 P  | 163nt upstream of gene PMM0573;                         |
| 542147 - | TSS_018662 | 1000 | 3521  | 0 | 6 I  | within gene(s) PMM0577;                                 |
| 543284 - | TSS_018683 | 1000 | 601   | 0 | 3 P  | 38nt upstream of gene PMM0578;                          |
| 545216 + | TSS_005808 | 1000 | 366   | 0 | 1 Ai | antisense to gene(s) PMM0580;                           |
| 546045 - | TSS_018690 | 1000 | 660   | 0 | 1 I  | within gene(s) PMM0580;                                 |
| 546530 + | TSS_005812 | 1000 | 854   | 0 | 1 Ai | antisense to gene(s) PMM0581;                           |
| 546844 - | TSS_013445 | 1000 |       | 0 | 5 I  | 17nt upstream of gene PMM0581;                          |
| 547595 - | TSS_018729 | 1000 | 143   | 0 | 0 I  | within gene(s) PMM0582;                                 |
| 548961 - | TSS_018736 | 1000 | 97    | 0 | 0 P  | 43nt upstream of gene PMM0583;                          |
| 552915 - | TSS_018749 | 1000 | 103   | 0 | 3 I  | within gene(s) PMM0585;                                 |
| 558188 + | TSS_005826 | 1000 | 150   | 0 | 1 P  | 14nt upstream of gene PMM0590;                          |
| 561219 - | TSS_018764 | 1000 | 144   | 0 | 0 I  | within gene(s) PMM0593;                                 |
| 562701 + | TSS_005834 | 1000 | 279   | 0 | 0 Ai | antisense to gene(s) PMM0594;                           |
| 565420 - | TSS_018819 | 1000 | 916   | 0 | 1 I  | within gene(s) PMM0596;                                 |
| 567864 + | TSS_005848 | 1000 | 109   | 0 | 0 Ai | antisense to gene(s) PMM0597;                           |
| 569600 - | TSS_018828 | 1000 | 109   | 0 | 4 P  | 20nt upstream of gene PMM0599;                          |
| 571068 - | TSS_018832 | 1000 | 107   | 0 | 1 Ai | antisense to gene(s) PMM0600;                           |
| 572225 + | TSS_005865 | 1000 | 99    | 0 | 7 I  | within gene(s) PMM0602;                                 |
| 573526 - | TSS_018837 | 1000 | 122   | 0 | 1 Ai | antisense to gene(s) PMM0603;                           |
| 575199 - | TSS_018839 | 1000 | 209   | 0 | 0 P  | 16nt upstream of gene PMM0605;                          |
| 577744 + | TSS_005882 | 1000 | 141   | 0 | 0 I  | within gene(s) PMM0608;                                 |
| 578017 - | TSS_018845 | 1000 | 329   | 0 | 0 Ai | antisense to gene(s) PMM0608;                           |
| 578318 + | TSS_005887 | 1000 | 154   | 0 | 0 IP | within gene(s) PMM0608; 247nt upstream of gene PMM0609; |
| 579495 + | TSS_005891 | 1000 | 486   | 0 | 0 I  | within gene(s) PMM0609;                                 |
| 582602 - | TSS_018857 | 1000 | 169   | 0 | 3 I  | within gene(s) PMM0611;                                 |
| 582767 - | TSS_018860 | 1000 | 199   | 0 | 6 P  | 17nt upstream of gene PMM0611;                          |
| 584058 - | TSS_018866 | 1000 | 247   | 0 | 2 I  | within gene(s) PMM0613;                                 |
| 585123 + | TSS_005904 | 1000 | 1561  | 0 | 4 P  | 120nt upstream of gene PMM0614;                         |
| 585737 + | TSS_005908 | 1000 | 383   | 0 | 1 IP | within gene(s) PMM0614; 160nt upstream of gene PMM0615; |
| 586359 + | TSS_005916 | 1000 | 480   | 0 | 3 I  | within gene(s) PMM0615;                                 |
| 587070 - | TSS_018870 | 1000 | 307   | 0 | 0 Ai | antisense to gene(s) PMM0616;                           |
| 588622 + | TSS_005922 | 1000 | 1292  | 0 | 3 P  | 9nt upstream of gene PMM0618;                           |
| 588874 + | TSS_005927 | 1000 | 241   | 0 | 1 I  | within gene(s) PMM0618;                                 |
| 590670 - | TSS_018876 | 1000 | 826   | 0 | 3 Ai | antisense to gene(s) PMM0619;                           |
| 591008 + | TSS_005958 | 1000 | 330   | 0 | 0 I  | within gene(s) PMM0619;                                 |
| 593663 - | TSS_018881 | 1000 | 129   | 0 | 0 I  | within gene(s) PMM0622;                                 |
| 594134 + | TSS_005965 | 1000 | 109   | 0 | 0 I  | within gene(s) PMM0623;                                 |
| 594680 + | TSS_005968 | 1000 | 100   | 0 | 2 I  | within gene(s) PMM0623;                                 |
| 595886 + | TSS_005970 | 1000 | 288   | 0 | 0 P  | 18nt upstream of gene PMM0626;                          |
| 596385 - | TSS_018888 | 1000 | 1055  | 0 | 1 O  | -                                                       |
| 599253 + | TSS_006047 | 1000 | 763   | 0 | 2 P  | 15nt upstream of gene PMM0629;                          |
| 600230 + | TSS_006048 | 1000 | 453   | 0 | 0 P  | 26nt upstream of gene PMM0631;                          |
| 602377 - | TSS_018902 | 1000 | 560   | 0 | 2 I  | within gene(s) PMM0633;                                 |
| 605795 + | TSS_006056 | 1000 | 203   | 0 | 4 P  | 18nt upstream of gene PMM0637;                          |
| 610210 + | TSS_006070 | 1000 | 1987  | 0 | 2 P  | 16nt upstream of gene PMM0641;                          |
| 610941 + | TSS_006075 | 1000 | 2768  | 0 | 3 P  | 17nt upstream of gene PMM0642;                          |
| 611411 + | TSS_006094 | 1000 | 346   | 0 | 24 I | within gene(s) PMM0642;                                 |
| 614781 - | TSS_018958 | 1000 | 134   | 0 | 0 P  | 15nt upstream of gene PMM0644;                          |
| 617157 - | TSS_018969 | 1000 | 8782  | 0 | 9 Ai | antisense to gene(s) PMM0646;                           |
| 619598 + | TSS_006181 | 1000 | 109   | 0 | 1 P  | 18nt upstream of gene PMM0649;                          |
| 620989 - | TSS_018983 | 1000 | 3453  | 0 | 6 P  | 13nt upstream of gene PMM0651;                          |
| 621700 - | TSS_018988 | 1000 | 112   | 0 | 0 P  | 156nt upstream of gene PMM0652;                         |
| 624976 + | TSS_006191 | 1000 | 354   | 0 | 4 I  | within gene(s) PMM0658;                                 |
| 626301 + | TSS_006195 | 1000 | 251   | 0 | 0 I  | within gene(s) PMM0659;                                 |
| 627045 - | TSS_018996 | 1000 | 285   | 0 | 1 O  | -                                                       |
| 627516 + | TSS_006197 | 1000 | 100   | 0 | 0 O  | -                                                       |
| 627971 - | TSS_019002 | 1000 | 3122  | 0 | 3 O  | -                                                       |
| 628169 + | TSS_006198 | 1000 | 402   | 0 | 0 O  | -                                                       |
| 628505 - | TSS_019027 | 1000 | 137   | 0 | 12 I | within gene(s) PMM0660;                                 |
| 628656 - | TSS_019030 | 1000 | 342   | 0 | 0 P  | 10nt upstream of gene PMM0660;                          |
| 629577 - | TSS_019122 | 1000 | 828   | 0 | 48 I | within gene(s) PMM0661;                                 |
| 630363 - | TSS_019287 | 1000 | 1381  | 0 | 36 I | within gene(s) PMM0661;                                 |
| 631116 - | TSS_019393 | 1000 | 13447 | 0 | 2 I  | within gene(s) PMM0661;                                 |
| 631165 + | TSS_006243 | 1000 | 223   | 0 | 0 P  | 27nt upstream of gene PMM0662;                          |
| 633583 + | TSS_006254 | 1000 | 219   | 0 | 1 P  | 23nt upstream of gene PMM0664;                          |
| 635224 - | TSS_019403 | 1000 | 108   | 0 | 0 IP | within gene(s) PMM0666; 40nt upstream of gene PMM0665;  |
| 635882 + | TSS_006260 | 1000 | 158   | 0 | 2 P  | 25nt upstream of gene PMM0667;                          |
| 638760 - | TSS_019414 | 1000 | 114   | 0 | 3 IP | within gene(s) PMM0671; 217nt upstream of gene PMM0670; |
| 643136 + | TSS_006285 | 1000 | 197   | 0 | 2 P  | 21nt upstream of gene PMM0675;                          |
| 643669 + | TSS_006286 | 1000 | 291   | 0 | 0 P  | 25nt upstream of gene PMM0676;                          |
| 644399 + | TSS_006291 | 1000 | 127   | 0 | 0 I  | within gene(s) PMM0676;                                 |
| 644589 + | TSS_006296 | 1000 | 116   | 0 | 3 I  | within gene(s) PMM0676;                                 |
| 644914 - | TSS_019428 | 1000 | 251   | 0 | 6 Ad | antisense to gene(s) PMM0676 (4nt downstream);          |
| 647282 - | TSS_019432 | 1000 | 1714  | 0 | 2 P  | 69nt upstream of gene PMM0678;                          |

|          |            |      |        |     |                                |                                                              |
|----------|------------|------|--------|-----|--------------------------------|--------------------------------------------------------------|
| 648438 + | TSS_006311 | 1000 | 250    | 0   | 0 Ai                           | antisense to gene(s) PMM0680;                                |
| 649461 + | TSS_006315 | 1000 | 230    | 0   | 6 I                            | within gene(s) PMM0681;                                      |
| 651413 + | TSS_006319 | 1000 | 356    | 0   | 0 I                            | within gene(s) PMM0683;                                      |
| 652626 + | TSS_006323 | 1000 | 755    | 0   | 0 O                            | -                                                            |
| 652926 + | TSS_004002 | 1000 | 120843 | 0   | 3 I                            | within gene(s) PMM0684;                                      |
| 653980 - | TSS_019452 | 1000 | 23297  | 0   | 2 O                            | -                                                            |
| 655603 - | TSS_019458 | 1000 | 2581   | 0   | 3 I                            | within gene(s) PMM0687;                                      |
| 655934 - | TSS_019464 | 1000 | 4542   | 0   | 2 O                            | -                                                            |
| 656679 - | TSS_019475 | 1000 | 336    | 0   | 0 P                            | 87nt upstream of gene PMM0688;                               |
| 656940 - | TSS_019481 | 1000 | 107    | 0   | 2 O                            | -                                                            |
| 657528 - | TSS_019486 | 1000 | 708    | 0   | 6 O                            | -                                                            |
| 659043 - | TSS_013967 | 1000 | 4198   | 0   | 3 P                            | 15nt upstream of gene PMM0690;                               |
| 659754 + | TSS_006357 | 1000 | 125    | 0   | 0 Ad                           | antisense to gene(s) PMM0691 (2nt downstream);               |
| 660094 - | TSS_013973 | 1000 | 98     | 0   | 6 P                            | 133nt upstream of gene PMM0691;                              |
| 660419 - | TSS_019505 | 1000 | 132    | 0   | 6 P                            | 22nt upstream of gene PMM0692;                               |
| 661103 - | TSS_019509 | 1000 | 157    | 0   | 0 I                            | within gene(s) PMM0693;                                      |
| 661982 + | TSS_006362 | 1000 | 596    | 0   | 4 O                            | -                                                            |
| 663342 + | TSS_006366 | 1000 | 103    | 0   | 0 Ai                           | antisense to gene(s) PMM0696;                                |
| 663678 - | TSS_019514 | 1000 | 168    | 0   | 6 P                            | 16nt upstream of gene PMM0697;                               |
| 664058 - | TSS_019517 | 1000 | 248    | 0   | 4 I                            | within gene(s) PMM0698;                                      |
| 665165 + | TSS_006371 | 1000 | 306    | 0   | 4 P                            | 16nt upstream of gene PMM0699;                               |
| 667290 + | TSS_006376 | 1000 | 180    | 0   | 2 P                            | 16nt upstream of gene PMM0703;                               |
| 668059 + | TSS_006383 | 1000 | 358    | 0   | 2 I                            | within gene(s) PMM0704;                                      |
| 668368 + | TSS_006384 | 1000 | 139    | 0   | 0 I                            | within gene(s) PMM0704;                                      |
| 669388 + | TSS_006389 | 1000 | 187    | 0   | 0 P                            | 12nt upstream of gene PMM0705;                               |
| 671507 - | TSS_019531 | 1000 | 119    | 0   | 0 I                            | within gene(s) PMM0707;                                      |
| 671615 - | TSS_019532 | 1000 | 170    | 0   | 0 I                            | within gene(s) PMM0707;                                      |
| 672523 - | TSS_019535 | 1000 | 125    | 0   | 0 I                            | within gene(s) PMM0708;                                      |
| 674151 + | TSS_006403 | 1000 | 2450   | 0   | 1 Ai                           | antisense to gene(s) PMM0709;                                |
| 674830 - | TSS_019533 | 1000 | 447    | 0   | 1 I                            | within gene(s) PMM0709;                                      |
| 675828 + | TSS_006411 | 1000 | 1225   | 0   | 5 P                            | 26nt upstream of gene PMM0710;                               |
| 676471 - | TSS_019559 | 1000 | 144    | 0   | 6 Ai                           | antisense to gene(s) PMM0710;                                |
| 678373 + | TSS_006417 | 1000 | 162    | 0   | 0 Ai                           | antisense to gene(s) PMM0712;                                |
| 680440 - | TSS_019576 | 1000 | 950    | 0   | 0 P                            | 15nt upstream of gene PMM0713;                               |
| 680511 - | TSS_019577 | 1000 | 269    | 0   | 0 PAi                          | 86nt upstream of gene PMM0713; antisense to gene(s) PMM0714; |
| 680855 - | TSS_019578 | 1000 | 106    | 0   | 0 Ai                           | antisense to gene(s) PMM0714;                                |
| 685615 - | TSS_019582 | 1000 | 992    | 0   | 5 P                            | 13nt upstream of gene PMM0722;                               |
| 686751 - | TSS_019585 | 1000 | 133    | 0   | 2 Ai                           | antisense to gene(s) PMM0723;                                |
| 687667 + | TSS_006440 | 1000 | 732    | 0   | 0 IP                           | within gene(s) PMM0724; 61nt upstream of gene PMM0725;       |
| 688353 + | TSS_006464 | 1000 | 261    | 0   | 0 I                            | within gene(s) PMM0725;                                      |
| 688866 + | TSS_006470 | 1000 | 10627  | 0   | 3 O                            | -                                                            |
| 688965 + | TSS_006475 | 1000 | 262    | 0   | 9 O                            | -                                                            |
| 689153 + | TSS_006477 | 1000 | 337    | 0   | 0 O                            | -                                                            |
| 689593 - | TSS_019603 | 1000 | 269    | 0   | 4 P                            | 17nt upstream of gene PMM0726;                               |
| 696382 - | TSS_019612 | 1000 | 96     | 0   | 0 P                            | 18nt upstream of gene PMM0732;                               |
| 698300 - | TSS_019615 | 1000 | 538    | 0   | 3 P                            | 15nt upstream of gene PMM0734;                               |
| 701382 + | TSS_006486 | 1000 | 108    | 0   | 0 P                            | 23nt upstream of gene PMM0738;                               |
| 702227 - | TSS_019631 | 1000 | 330    | 0   | 1 P                            | 16nt upstream of gene PMM0739;                               |
| 702332 + | TSS_006489 | 1000 | 1075   | 0   | 3 P                            | 11nt upstream of gene PMM0740;                               |
| 702516 - | TSS_019633 | 1000 | 350    | 0   | 0 O                            | -                                                            |
| 704397 - | TSS_019669 | 1000 | 312    | 0   | 55 I                           | within gene(s) PMM0743;                                      |
| 705815 - | TSS_019768 | 1000 | 270    | 0   | 1 P                            | 23nt upstream of gene PMM0743;                               |
| 708607 - | TSS_019777 | 1000 | 684    | 0   | 6 P                            | 14nt upstream of gene PMM0746;                               |
| 709324 + | TSS_006571 | 1000 | 165    | 0   | 0 IP                           | within gene(s) PMM0747; 32nt upstream of gene PMM0748;       |
| 710247 + | TSS_006575 | 1000 | 218    | 0   | 1 IP                           | within gene(s) PMM0748; 23nt upstream of gene PMM0749;       |
| 711092 + | TSS_006584 | 1000 | 164    | 0   | 0 I                            | within gene(s) PMM0749;                                      |
| 711431 - | TSS_019784 | 1000 | 94     | 0   | 0 Ai                           | antisense to gene(s) PMM0749;                                |
| 711539 + | TSS_006586 | 1000 | 4345   | 0   | 2 I                            | within gene(s) PMM0750;                                      |
| 711829 - | TSS_019787 | 1000 | 1051   | 0   | 6 Ai                           | antisense to gene(s) PMM0750;                                |
| 712163 + | TSS_006588 | 1000 | 238    | 0   | 0 IP                           | within gene(s) PMM0750; 42nt upstream of gene PMM0751;       |
| 713805 + | TSS_006604 | 1000 | 174    | 0   | 0 I                            | within gene(s) PMM0753;                                      |
| 714106 - | TSS_019798 | 1000 | 147    | 0   | 2 Ai                           | antisense to gene(s) PMM0753;                                |
| 714352 + | TSS_006617 | 1000 | 116    | 0   | 1 I                            | within gene(s) PMM0754;                                      |
| 714804 - | TSS_019802 | 1000 | 175    | 0   | 0 Ai                           | antisense to gene(s) PMM0754;                                |
| 719033 + | TSS_006630 | 1000 | 205    | 0   | 6 I                            | within gene(s) PMM0757;                                      |
| 720208 + | TSS_006635 | 1000 | 116    | 0   | 0 Ai                           | antisense to gene(s) PMM0758;                                |
| 720651 - | TSS_019859 | 1000 | 692    | 0   | 25 I                           | within gene(s) PMM0758;                                      |
| 721002 - | TSS_014217 | 1000 | 0      | 0 P | 15nt upstream of gene PMM0758; |                                                              |
| 723763 - | TSS_019917 | 1000 | 671    | 0   | 24 I                           | within gene(s) PMM0760;                                      |
| 724438 - | TSS_019979 | 1000 | 152    | 0   | 6 I                            | within gene(s) PMM0760;                                      |
| 724578 - | TSS_019983 | 1000 | 2549   | 0   | 2 P                            | 20nt upstream of gene PMM0760;                               |
| 725488 + | TSS_006654 | 1000 | 154    | 0   | 4 P                            | 25nt upstream of gene PMM0762;                               |
| 728301 - | TSS_019992 | 1000 | 157    | 0   | 0 Ai                           | antisense to gene(s) PMM0764;                                |
| 729981 - | TSS_020004 | 1000 | 133    | 0   | 3 I                            | within gene(s) PMM0766;                                      |
| 730435 + | TSS_006719 | 1000 | 1185   | 0   | 1 I                            | within gene(s) PMM0767;                                      |
| 732872 + | TSS_006732 | 1000 | 235    | 0   | 0 P                            | 21nt upstream of gene PMM0769;                               |
| 734112 - | TSS_020022 | 1000 | 153    | 0   | 4 Ai                           | antisense to gene(s) PMM0769;                                |
| 734269 + | TSS_006750 | 1000 | 6225   | 0   | 4 P                            | 18nt upstream of gene PMM0770;                               |
| 734570 + | TSS_006758 | 1000 | 106    | 0   | 1 I                            | within gene(s) PMM0770;                                      |
| 736446 + | TSS_006779 | 1000 | 100    | 0   | 5 P                            | 15nt upstream of gene PMM0772;                               |

|          |            |      |       |   |       |                                                                         |
|----------|------------|------|-------|---|-------|-------------------------------------------------------------------------|
| 737771 - | TSS_020038 | 1000 | 163   | 0 | 14 I  | within gene(s) PMM0774;                                                 |
| 737882 - | TSS_020050 | 1000 | 305   | 0 | 0 I   | within gene(s) PMM0774;                                                 |
| 738561 + | TSS_006793 | 1000 | 524   | 0 | 0 Ai  | antisense to gene(s) PMM0774;                                           |
| 738857 - | TSS_020089 | 1000 | 150   | 0 | 12 I  | within gene(s) PMM0774;                                                 |
| 739095 - | TSS_020100 | 1000 | 3171  | 0 | 4 P   | 13nt upstream of gene PMM0774;                                          |
| 739410 - | TSS_020106 | 1000 | 659   | 0 | 10 P  | 14nt upstream of gene PMM0775;                                          |
| 740068 + | TSS_006801 | 1000 | 694   | 0 | 2 P   | 38nt upstream of gene PMM0777;                                          |
| 741992 + | TSS_006829 | 1000 | 1445  | 0 | 0 P   | 15nt upstream of gene PMM0779;                                          |
| 742370 + | TSS_006835 | 1000 | 188   | 0 | 3 I   | within gene(s) PMM0780;                                                 |
| 744091 - | TSS_020193 | 1000 | 1766  | 0 | 2 P   | 43nt upstream of gene PMM0781;                                          |
| 746286 - | TSS_020205 | 1000 | 296   | 0 | 2 I   | within gene(s) PMM0784;                                                 |
| 746584 - | TSS_020211 | 1000 | 282   | 0 | 5 P   | 18nt upstream of gene PMM0784;                                          |
| 747387 - | TSS_020214 | 1000 | 510   | 0 | 5 I   | within gene(s) PMM0785;                                                 |
| 747664 - | TSS_020215 | 1000 | 185   | 0 | 2 P   | 15nt upstream of gene PMM0785;                                          |
| 749173 - | TSS_020221 | 1000 | 1267  | 0 | 4 I   | within gene(s) PMM0787;                                                 |
| 752029 - | TSS_020242 | 1000 | 186   | 0 | 8 P   | 25nt upstream of gene PMM0790;                                          |
| 752047 + | TSS_006865 | 1000 | 336   | 0 | 12 Ai | antisense to gene(s) PMM0791;                                           |
| 752129 + | TSS_006866 | 1000 | 100   | 0 | 0 Ai  | antisense to gene(s) PMM0791;                                           |
| 755386 - | TSS_020247 | 1000 | 276   | 0 | 1 IP  | within gene(s) PMM0795; 114nt upstream of gene PMM0794;                 |
| 756926 - | TSS_020251 | 1000 | 119   | 0 | 0 P   | 17nt upstream of gene PMM0795;                                          |
| 757372 - | TSS_020252 | 1000 | 110   | 0 | 0 I   | within gene(s) PMM0796;                                                 |
| 757822 - | TSS_020259 | 1000 | 320   | 0 | 1 P   | 66nt upstream of gene PMM0796;                                          |
| 760238 - | TSS_020263 | 1000 | 94    | 0 | 11 P  | 6nt upstream of gene PMM0800;                                           |
| 762992 + | TSS_006874 | 1000 | 2772  | 0 | 0 P   | 16nt upstream of gene PMM0804;                                          |
| 763062 + | TSS_006882 | 1000 | 1309  | 0 | 17 I  | within gene(s) PMM0804;                                                 |
| 763761 + | TSS_006935 | 1000 | 160   | 0 | 0 Ai  | antisense to gene(s) PMM0805;                                           |
| 764067 + | TSS_006938 | 1000 | 229   | 0 | 0 Ai  | antisense to gene(s) PMM0806;                                           |
| 764468 - | TSS_020284 | 1000 | 167   | 0 | 3 P   | 26nt upstream of gene PMM0806;                                          |
| 768634 - | TSS_020291 | 1000 | 1957  | 0 | 1 P   | 16nt upstream of gene PMM0810;                                          |
| 769201 - | TSS_020295 | 1000 | 500   | 0 | 0 O   | -                                                                       |
| 771730 - | TSS_020301 | 1000 | 120   | 0 | 0 P   | 22nt upstream of gene PMM0814;                                          |
| 772207 - | TSS_020305 | 1000 | 1195  | 0 | 1 O   | -                                                                       |
| 773190 - | TSS_020323 | 1000 | 771   | 0 | 2 I   | within gene(s) PMM0815;                                                 |
| 773382 - | TSS_020352 | 1000 | 1262  | 0 | 10 IP | within gene(s) PMM0816; 189nt upstream of gene PMM0815;                 |
| 773816 - | TSS_020404 | 1000 | 57347 | 0 | 6 P   | 16nt upstream of gene PMM0818;                                          |
| 774713 - | TSS_020416 | 1000 | 125   | 0 | 1 I   | within gene(s) PMM0819;                                                 |
| 774773 - | TSS_020419 | 1000 | 12393 | 0 | 3 P   | 18nt upstream of gene PMM0819;                                          |
| 775810 - | TSS_020425 | 1000 | 839   | 0 | 1 O   | -                                                                       |
| 776471 - | TSS_020428 | 1000 | 199   | 0 | 4 O   | -                                                                       |
| 777149 - | TSS_020435 | 1000 | 489   | 0 | 1 I   | within gene(s) PMM0821;                                                 |
| 778975 - | TSS_020453 | 1000 | 1967  | 0 | 7 P   | 14nt upstream of gene PMM0824;                                          |
| 779053 + | TSS_006974 | 1000 | 100   | 0 | 1 P   | 17nt upstream of gene PMM0825;                                          |
| 779674 - | TSS_020460 | 1000 | 178   | 0 | 0 Ai  | antisense to gene(s) PMM0825;                                           |
| 780730 - | TSS_020463 | 1000 | 360   | 0 | 0 Ai  | antisense to gene(s) PMM0825;                                           |
| 781041 + | TSS_007009 | 1000 | 210   | 0 | 15 I  | within gene(s) PMM0825;                                                 |
| 784835 + | TSS_007050 | 1000 | 198   | 0 | 0 I   | within gene(s) PMM0829;                                                 |
| 787909 - | TSS_020511 | 1000 | 192   | 0 | 9 I   | within gene(s) PMM0831;                                                 |
| 790206 - | TSS_014848 | 1000 | 0     | 0 | 1 I   | 17nt upstream of gene PMM0831;                                          |
| 796520 + | TSS_007070 | 1000 | 201   | 0 | 1 Ai  | antisense to gene(s) PMM0839;                                           |
| 803506 - | TSS_020584 | 1000 | 109   | 0 | 6 I   | within gene(s) PMM0844;                                                 |
| 804298 - | TSS_020612 | 1000 | 474   | 0 | 1 P   | 14nt upstream of gene PMM0844;                                          |
| 807760 - | TSS_020621 | 1000 | 172   | 0 | 2 P   | 27nt upstream of gene PMM0847;                                          |
| 808842 + | TSS_007086 | 1000 | 1057  | 0 | 2 P   | 117nt upstream of gene PMM0851;                                         |
| 810059 - | TSS_020628 | 1000 | 98    | 0 | 3 IAd | within gene(s) PMM0853; antisense to gene(s) PMM0852 (24nt downstream); |
| 810075 + | TSS_007090 | 1000 | 33    | 0 | 0 Ai  | antisense to gene(s) PMM0853;                                           |
| 810098 - | TSS_020634 | 1000 | 142   | 0 | 13 I  | within gene(s) PMM0853;                                                 |
| 810119 - | TSS_020636 | 1000 | 115   | 0 | 9 I   | within gene(s) PMM0853;                                                 |
| 810137 - | TSS_020638 | 1000 | 79    | 0 | 0 I   | within gene(s) PMM0853;                                                 |
| 810173 - | TSS_020649 | 1000 | 637   | 0 | 41 I  | within gene(s) PMM0853;                                                 |
| 810194 - | TSS_020655 | 1000 | 302   | 0 | 0 I   | within gene(s) PMM0853;                                                 |
| 810209 - | TSS_020657 | 1000 | 239   | 0 | 6 I   | within gene(s) PMM0853;                                                 |
| 810234 - | TSS_014951 | 1000 | 0     | 0 | 0 P   | 16nt upstream of gene PMM0853;                                          |
| 811735 - | TSS_020662 | 1000 | 356   | 0 | 0 Ai  | antisense to gene(s) PMM0854;                                           |
| 813572 - | TSS_020715 | 1000 | 2177  | 0 | 12 P  | 45nt upstream of gene PMM0856;                                          |
| 814913 + | TSS_007109 | 1000 | 2209  | 0 | 2 O   | -                                                                       |
| 815258 - | TSS_020727 | 1000 | 101   | 0 | 0 O   | -                                                                       |
| 815652 - | TSS_020728 | 1000 | 132   | 0 | 0 O   | -                                                                       |
| 816028 + | TSS_007114 | 1000 | 114   | 0 | 0 I   | within gene(s) PMM0858;                                                 |
| 816976 + | TSS_007117 | 1000 | 608   | 0 | 0 O   | -                                                                       |
| 817333 + | TSS_007119 | 1000 | 481   | 0 | 1 O   | -                                                                       |
| 818060 - | TSS_020731 | 1000 | 121   | 0 | 0 O   | -                                                                       |
| 818750 - | TSS_020733 | 1000 | 114   | 0 | 0 P   | 24nt upstream of gene PMM0860;                                          |
| 819403 - | TSS_020738 | 1000 | 212   | 0 | 2 O   | -                                                                       |
| 820064 - | TSS_020741 | 1000 | 97    | 0 | 0 O   | -                                                                       |
| 821072 - | TSS_020745 | 1000 | 97    | 0 | 2 I   | within gene(s) PMM0863;                                                 |
| 826307 - | TSS_020771 | 1000 | 722   | 0 | 6 P   | 24nt upstream of gene PMM0870;                                          |
| 827556 - | TSS_020775 | 1000 | 510   | 0 | 0 Ai  | antisense to gene(s) PMM0871;                                           |
| 828957 + | TSS_007140 | 1000 | 4821  | 0 | 2 I   | within gene(s) PMM0872;                                                 |
| 830651 - | TSS_020786 | 1000 | 109   | 0 | 5 P   | 17nt upstream of gene PMM0873;                                          |
| 831934 + | TSS_007146 | 1000 | 151   | 0 | 0 Ai  | antisense to gene(s) PMM0875;                                           |

|          |            |      |        |   |      |                                                         |
|----------|------------|------|--------|---|------|---------------------------------------------------------|
| 834878 - | TSS_020798 | 1000 | 1528   | 0 | 3 I  | within gene(s) PMM0877;                                 |
| 837146 - | TSS_020822 | 1000 | 734    | 0 | 2 P  | 38nt upstream of gene PMM0878;                          |
| 840244 - | TSS_020827 | 1000 | 164    | 0 | 2 Ai | antisense to gene(s) PMM0879;                           |
| 841241 - | TSS_020832 | 1000 | 117    | 0 | 0 I  | within gene(s) PMM0880;                                 |
| 844697 - | TSS_020861 | 1000 | 3903   | 0 | 5 P  | 15nt upstream of gene PMM0883;                          |
| 855371 + | TSS_007185 | 1000 | 140    | 0 | 3 I  | within gene(s) PMM0893;                                 |
| 857107 + | TSS_007194 | 1000 | 95     | 0 | 1 Ai | antisense to gene(s) PMM0894;                           |
| 857549 - | TSS_020905 | 1000 | 2450   | 0 | 2 P  | 18nt upstream of gene PMM0894;                          |
| 858686 - | TSS_020928 | 1000 | 487    | 0 | 0 I  | within gene(s) PMM0896;                                 |
| 858957 - | TSS_020931 | 1000 | 538    | 0 | 2 IP | within gene(s) PMM0897; 21nt upstream of gene PMM0896;  |
| 859899 + | TSS_007202 | 1000 | 194    | 0 | 0 Ai | antisense to gene(s) PMM0897;                           |
| 860406 - | TSS_020949 | 1000 | 1882   | 0 | 1 I  | within gene(s) PMM0897;                                 |
| 860980 - | TSS_020953 | 1000 | 594    | 0 | 2 P  | 63nt upstream of gene PMM0897;                          |
| 862187 + | TSS_007213 | 1000 | 242    | 0 | 6 I  | within gene(s) PMM0899;                                 |
| 863809 + | TSS_007219 | 1000 | 258    | 0 | 1 P  | 23nt upstream of gene PMM0901;                          |
| 865759 + | TSS_007230 | 1000 | 1816   | 0 | 6 P  | 17nt upstream of gene PMM0902;                          |
| 867288 + | TSS_007235 | 1000 | 140    | 0 | 0 I  | within gene(s) PMM0906;                                 |
| 867687 + | TSS_007237 | 1000 | 113    | 0 | 0 Ai | antisense to gene(s) PMM0907;                           |
| 867831 + | TSS_007239 | 1000 | 98     | 0 | 0 Ai | antisense to gene(s) PMM0907;                           |
| 868133 + | TSS_007241 | 1000 | 113    | 0 | 0 Ai | antisense to gene(s) PMM0907;                           |
| 869447 - | TSS_020979 | 1000 | 1684   | 0 | 4 P  | 16nt upstream of gene PMM0907;                          |
| 869921 + | TSS_007247 | 1000 | 147    | 0 | 0 I  | within gene(s) PMM0908;                                 |
| 870149 + | TSS_007250 | 1000 | 250    | 0 | 4 I  | within gene(s) PMM0908;                                 |
| 873612 + | TSS_007287 | 1000 | 823    | 0 | 3 I  | within gene(s) PMM0912;                                 |
| 874281 + | TSS_007293 | 1000 | 90     | 0 | 1 I  | within gene(s) PMM0913;                                 |
| 874787 + | TSS_007294 | 1000 | 103    | 0 | 0 I  | within gene(s) PMM0913;                                 |
| 879143 + | TSS_007301 | 1000 | 150    | 0 | 0 Ai | antisense to gene(s) PMM0917;                           |
| 880878 + | TSS_007311 | 1000 | 117    | 0 | 0 Ai | antisense to gene(s) PMM0919;                           |
| 881167 - | TSS_021010 | 1000 | 914    | 0 | 0 P  | 15nt upstream of gene PMM0919;                          |
| 881330 + | TSS_007314 | 1000 | 361    | 0 | 1 P  | 37nt upstream of gene PMM0920;                          |
| 881352 + | TSS_007315 | 1000 | 37561  | 0 | 0 P  | 15nt upstream of gene PMM0920;                          |
| 883958 + | TSS_007618 | 1000 | 91     | 0 | 2 P  | 15nt upstream of gene PMM0922;                          |
| 886557 + | TSS_007630 | 1000 | 1006   | 0 | 7 P  | 14nt upstream of gene PMM0926;                          |
| 889213 + | TSS_007636 | 1000 | 105    | 0 | 0 Ai | antisense to gene(s) PMM0929;                           |
| 891601 - | TSS_021061 | 1000 | 1057   | 0 | 4 P  | 23nt upstream of gene PMM0930;                          |
| 894754 + | TSS_007649 | 1000 | 180    | 0 | 0 P  | 45nt upstream of gene PMM0936;                          |
| 899977 + | TSS_007662 | 1000 | 926    | 0 | 3 P  | 13nt upstream of gene PMM0941;                          |
| 900041 + | TSS_007669 | 1000 | 820    | 0 | 13 I | within gene(s) PMM0941;                                 |
| 901047 + | TSS_007711 | 1000 | 8304   | 0 | 9 P  | 14nt upstream of gene PMM0943;                          |
| 901817 - | TSS_021079 | 1000 | 91     | 0 | 9 I  | within gene(s) PMM0945;                                 |
| 905299 - | TSS_021099 | 1000 | 1491   | 0 | 2 P  | 14nt upstream of gene PMM0945;                          |
| 905410 - | TSS_021102 | 1000 | 108    | 0 | 2 IP | within gene(s) PMM0946; 125nt upstream of gene PMM0945; |
| 905848 - | TSS_021108 | 1000 | 167    | 0 | 2 I  | within gene(s) PMM0946;                                 |
| 906046 - | TSS_021112 | 1000 | 91     | 0 | 3 I  | within gene(s) PMM0946;                                 |
| 907099 - | TSS_021122 | 1000 | 767    | 0 | 2 P  | 6nt upstream of gene PMM0947;                           |
| 913287 + | TSS_007729 | 1000 | 163    | 0 | 0 I  | within gene(s) PMM0954;                                 |
| 913440 + | TSS_007731 | 1000 | 936    | 0 | 1 IP | within gene(s) PMM0954; 246nt upstream of gene PMM0955; |
| 913823 + | TSS_007734 | 1000 | 260    | 0 | 2 I  | within gene(s) PMM0955;                                 |
| 914442 + | TSS_007737 | 1000 | 112    | 0 | 0 O  | -                                                       |
| 914689 - | TSS_021139 | 1000 | 102    | 0 | 0 O  | -                                                       |
| 915624 + | TSS_007740 | 1000 | 481    | 0 | 2 P  | 2nt upstream of gene PMM0957;                           |
| 916221 - | TSS_021152 | 1000 | 427    | 0 | 2 O  | -                                                       |
| 916530 - | TSS_021155 | 1000 | 561    | 0 | 1 P  | 16nt upstream of gene PMM0958;                          |
| 918232 + | TSS_007749 | 1000 | 389    | 0 | 0 Ai | antisense to gene(s) PMM0960;                           |
| 919141 - | TSS_021161 | 1000 | 314    | 0 | 1 I  | within gene(s) PMM0961;                                 |
| 920682 - | TSS_021164 | 1000 | 251    | 0 | 0 Ai | antisense to gene(s) PMM0962;                           |
| 922689 + | TSS_007776 | 1000 | 357    | 0 | 2 Ai | antisense to gene(s) PMM0963;                           |
| 923470 + | TSS_007777 | 1000 | 103    | 0 | 1 Ai | antisense to gene(s) PMM0965;                           |
| 923723 - | TSS_021192 | 1000 | 522    | 0 | 0 I  | within gene(s) PMM0965;                                 |
| 923809 - | TSS_021194 | 1000 | 371    | 0 | 5 IP | within gene(s) PMM0966; 85nt upstream of gene PMM0965;  |
| 924547 - | TSS_021198 | 1000 | 848    | 0 | 0 I  | within gene(s) PMM0966;                                 |
| 925793 + | TSS_007785 | 1000 | 256    | 0 | 2 IP | within gene(s) PMM0968; 65nt upstream of gene PMM0969;  |
| 926558 + | TSS_005119 | 1000 | 255832 | 0 | 5 P  | 10nt upstream of gene PMM0970;                          |
| 926661 + | TSS_007807 | 1000 | 1759   | 0 | 37 I | within gene(s) PMM0970;                                 |
| 927441 + | TSS_007993 | 1000 | 3020   | 0 | 88 I | within gene(s) PMM0970;                                 |
| 929465 - | TSS_021235 | 1000 | 161    | 0 | 1 Ai | antisense to gene(s) PMM0972;                           |
| 930151 + | TSS_008074 | 1000 | 184    | 0 | 7 IP | within gene(s) PMM0972; 101nt upstream of gene PMM0973; |
| 931059 + | TSS_008086 | 1000 | 98     | 0 | 0 I  | within gene(s) PMM0974;                                 |
| 933017 + | TSS_008092 | 1000 | 870    | 0 | 0 I  | within gene(s) PMM0975;                                 |
| 936929 + | TSS_008097 | 1000 | 367    | 0 | 1 O  | -                                                       |
| 937963 + | TSS_008099 | 1000 | 672    | 0 | 1 P  | 15nt upstream of gene PMM0982;                          |
| 939028 - | TSS_021253 | 1000 | 109    | 0 | 0 P  | 17nt upstream of gene PMM0983;                          |
| 939168 + | TSS_008103 | 1000 | 237    | 0 | 2 O  | -                                                       |
| 942377 - | TSS_021268 | 1000 | 706    | 0 | 1 P  | 126nt upstream of gene PMM0988;                         |
| 946441 + | TSS_008118 | 1000 | 217    | 0 | 0 Ai | antisense to gene(s) PMM0993;                           |
| 948048 + | TSS_008123 | 1000 | 0      | 0 | 9 P  | 17nt upstream of gene PMM0996;                          |
| 948628 + | TSS_008123 | 1000 | 0      | 0 | 1 O  | -                                                       |
| 949329 - | TSS_021293 | 1000 | 1173   | 0 | 1 O  | -                                                       |
| 950002 + | TSS_008138 | 1000 | 215    | 0 | 0 P  | 15nt upstream of gene PMM0999;                          |
| 950681 + | TSS_008139 | 1000 | 96     | 0 | 0 P  | 15nt upstream of gene PMM1001;                          |

|           |            |      |       |   |       |                                                               |
|-----------|------------|------|-------|---|-------|---------------------------------------------------------------|
| 956897 -  | TSS_021298 | 1000 | 740   | 0 | 2 P   | 17nt upstream of gene PMM1005;                                |
| 958314 -  | TSS_021421 | 1000 | 203   | 0 | 0 P   | 15nt upstream of gene PMM1007;                                |
| 961818 +  | TSS_008201 | 1000 | 981   | 0 | 3 P   | 14nt upstream of gene PMM1013;                                |
| 963397 -  | TSS_021425 | 1000 | 101   | 0 | 1 P   | 14nt upstream of gene PMM1015;                                |
| 965105 +  | TSS_008209 | 1000 | 318   | 0 | 0 O   | -                                                             |
| 965725 -  | TSS_021428 | 1000 | 108   | 0 | 1 P   | 238nt upstream of gene PMM1018a;                              |
| 971676 -  | TSS_021439 | 1000 | 166   | 0 | 0 P   | 4nt upstream of gene PMM1026;                                 |
| 972175 -  | TSS_021440 | 1000 | 2037  | 0 | 2 O   | -                                                             |
| 973076 -  | TSS_021443 | 1000 | 423   | 0 | 1 Ai  | antisense to gene(s) PMM1028;                                 |
| 973232 +  | TSS_008229 | 1000 | 957   | 0 | 0 O   | -                                                             |
| 974221 +  | TSS_008234 | 1000 | 1481  | 0 | 3 P   | 27nt upstream of gene PMM1030;                                |
| 975550 +  | TSS_008241 | 1000 | 443   | 0 | 0 P   | 17nt upstream of gene PMM1032;                                |
| 977043 +  | TSS_008322 | 1000 | 1115  | 0 | 6 P   | 32nt upstream of gene PMM1033;                                |
| 977946 +  | TSS_008346 | 1000 | 124   | 0 | 0 I   | within gene(s) PMM1033;                                       |
| 978424 +  | TSS_008365 | 1000 | 281   | 0 | 1 I   | within gene(s) PMM1033 PMM1034;                               |
| 979901 +  | TSS_015644 | 1000 |       | 0 | 1 O   | -                                                             |
| 981473 +  | TSS_008374 | 1000 | 92    | 0 | 1 P   | 1nt upstream of gene PMM1038;                                 |
| 981600 +  | TSS_008375 | 1000 | 184   | 0 | 0 I   | within gene(s) PMM1038;                                       |
| 984201 +  | TSS_008389 | 1000 | 95    | 0 | 3 I   | within gene(s) PMM1040;                                       |
| 984870 +  | TSS_008394 | 1000 | 680   | 0 | 5 I   | within gene(s) PMM1041;                                       |
| 985398 +  | TSS_008397 | 1000 | 119   | 0 | 0 IP  | within gene(s) PMM1041; 91nt upstream of gene PMM1042;        |
| 985468 +  | TSS_008399 | 1000 | 394   | 0 | 7 P   | 21nt upstream of gene PMM1042;                                |
| 996144 -  | TSS_021492 | 1000 | 613   | 0 | 0 IP  | within gene(s) PMM1054; 183nt upstream of gene PMM1053;       |
| 997065 -  | TSS_021500 | 1000 | 302   | 0 | 1 I   | within gene(s) PMM1055;                                       |
| 998833 +  | TSS_008421 | 1000 | 103   | 0 | 1 PAi | 156nt upstream of gene PMM1058; antisense to gene(s) PMM1057; |
| 998966 +  | TSS_008423 | 1000 | 1036  | 0 | 0 P   | 23nt upstream of gene PMM1058;                                |
| 1000663 - | TSS_021515 | 1000 | 269   | 0 | 2 P   | 16nt upstream of gene PMM1061;                                |
| 1000796 - | TSS_021518 | 1000 | 7631  | 0 | 3 P   | 149nt upstream of gene PMM1061;                               |
| 1000995 - | TSS_021520 | 1000 | 195   | 0 | 1 I   | within gene(s) PMM1062;                                       |
| 1001106 + | TSS_008427 | 1000 | 739   | 0 | 1 Ai  | antisense to gene(s) PMM1062;                                 |
| 1001916 - | TSS_021526 | 1000 | 114   | 0 | 0 I   | within gene(s) PMM1062;                                       |
| 1002186 + | TSS_005367 | 1000 | 3197  | 0 | 8 P   | 13nt upstream of gene PMM1063;                                |
| 1007850 + | TSS_008477 | 1000 | 7089  | 0 | 5 P   | 14nt upstream of gene PMM1066;                                |
| 1008779 + | TSS_008503 | 1000 | 161   | 0 | 9 I   | within gene(s) PMM1066;                                       |
| 1008963 + | TSS_008515 | 1000 | 1188  | 0 | 1 I   | within gene(s) PMM1066;                                       |
| 1009058 + | TSS_008517 | 1000 | 159   | 0 | 3 I   | within gene(s) PMM1066;                                       |
| 1009601 + | TSS_008549 | 1000 | 216   | 0 | 3 I   | within gene(s) PMM1067;                                       |
| 1011525 + | TSS_008555 | 1000 | 129   | 0 | 11 P  | 21nt upstream of gene PMM1069;                                |
| 1012326 + | TSS_008570 | 1000 | 297   | 0 | 6 IP  | within gene(s) PMM1069; 154nt upstream of gene PMM1070;       |
| 1012395 + | TSS_008578 | 1000 | 120   | 0 | 12 IP | within gene(s) PMM1069; 85nt upstream of gene PMM1070;        |
| 1013842 - | TSS_021560 | 1000 | 174   | 0 | 0 Ai  | antisense to gene(s) PMM1071;                                 |
| 1016820 - | TSS_021592 | 1000 | 241   | 0 | 3 IP  | within gene(s) PMM1074; 241nt upstream of gene PMM1073;       |
| 1018128 - | TSS_021690 | 1000 | 3145  | 0 | 3 P   | 18nt upstream of gene PMM1074;                                |
| 1018655 - | TSS_021747 | 1000 | 2310  | 0 | 10 I  | within gene(s) PMM1075;                                       |
| 1019222 - | TSS_021849 | 1000 | 2139  | 0 | 12 I  | within gene(s) PMM1075;                                       |
| 1019366 - | TSS_021860 | 1000 | 3182  | 0 | 1 P   | 30nt upstream of gene PMM1075;                                |
| 1019487 + | TSS_008630 | 1000 | 1860  | 0 | 1 P   | 32nt upstream of gene PMM1076;                                |
| 1020379 - | TSS_021867 | 1000 | 2997  | 0 | 2 I   | within gene(s) PMM1077;                                       |
| 1021282 - | TSS_021874 | 1000 | 384   | 0 | 0 I   | within gene(s) PMM1077;                                       |
| 1022762 - | TSS_021876 | 1000 | 251   | 0 | 0 I   | within gene(s) PMM1080;                                       |
| 1023134 + | TSS_008647 | 1000 | 278   | 0 | 6 Ai  | antisense to gene(s) PMM1080;                                 |
| 1023493 - | TSS_021925 | 1000 | 2704  | 0 | 1 P   | 19nt upstream of gene PMM1080;                                |
| 1023698 + | TSS_008655 | 1000 | 168   | 0 | 3 P   | 26nt upstream of gene PMM1081;                                |
| 1024480 + | TSS_008664 | 1000 | 607   | 0 | 4 I   | within gene(s) PMM1081;                                       |
| 1028961 + | TSS_008674 | 1000 | 142   | 0 | 0 IP  | within gene(s) PMM1084; 27nt upstream of gene PMM1085;        |
| 1029223 - | TSS_021937 | 1000 | 328   | 0 | 0 Ai  | antisense to gene(s) PMM1085;                                 |
| 1029801 - | TSS_021939 | 1000 | 381   | 0 | 0 Ai  | antisense to gene(s) PMM1085;                                 |
| 1033430 - | TSS_022195 | 1000 | 718   | 0 | 129 I | within gene(s) PMM1088;                                       |
| 1034417 - | TSS_022375 | 1000 | 596   | 0 | 48 I  | within gene(s) PMM1088;                                       |
| 1034569 - | TSS_022398 | 1000 | 15472 | 0 | 2 P   | 17nt upstream of gene PMM1088;                                |
| 1035252 + | TSS_008723 | 1000 | 476   | 0 | 1 P   | 14nt upstream of gene PMM1090;                                |
| 1036076 + | TSS_008730 | 1000 | 453   | 0 | 0 I   | within gene(s) PMM1090;                                       |
| 1037053 + | TSS_008743 | 1000 | 151   | 0 | 1 I   | within gene(s) PMM1091;                                       |
| 1037521 + | TSS_008746 | 1000 | 261   | 0 | 0 IP  | within gene(s) PMM1091; 41nt upstream of gene PMM1092;        |
| 1037579 - | TSS_022409 | 1000 | 161   | 0 | 0 Ai  | antisense to gene(s) PMM1092;                                 |
| 1038020 + | TSS_008748 | 1000 | 173   | 0 | 0 I   | within gene(s) PMM1092;                                       |
| 1039004 + | TSS_008755 | 1000 | 131   | 0 | 0 I   | within gene(s) PMM1093;                                       |
| 1041398 - | TSS_022419 | 1000 | 183   | 0 | 0 I   | within gene(s) PMM1096;                                       |
| 1041770 + | TSS_008762 | 1000 | 712   | 0 | 0 Ai  | antisense to gene(s) PMM1097;                                 |
| 1042334 - | TSS_022428 | 1000 | 986   | 0 | 0 P   | 14nt upstream of gene PMM1097;                                |
| 1042406 + | TSS_008766 | 1000 | 2108  | 0 | 0 P   | 20nt upstream of gene PMM1098;                                |
| 1042908 - | TSS_022432 | 1000 | 100   | 0 | 1 Ai  | antisense to gene(s) PMM1098;                                 |
| 1056495 - | TSS_022440 | 1000 | 122   | 0 | 0 IP  | within gene(s) PMM1107; 182nt upstream of gene PMM1106;       |
| 1057074 - | TSS_022450 | 1000 | 2491  | 0 | 1 P   | 35nt upstream of gene PMM1107;                                |
| 1058522 + | TSS_008806 | 1000 | 1328  | 0 | 3 IP  | within gene(s) PMM1110; 95nt upstream of gene PMM1111;        |
| 1059299 + | TSS_008813 | 1000 | 333   | 0 | 0 P   | 47nt upstream of gene PMM1113;                                |
| 1059858 + | TSS_008821 | 1000 | 290   | 0 | 2 I   | within gene(s) PMM1113;                                       |
| 1063713 + | TSS_005674 | 1000 |       | 0 | 1 P   | 21nt upstream of gene PMM1117;                                |
| 1063850 + | TSS_008835 | 1000 | 131   | 0 | 4 O   | -                                                             |
| 1064477 + | TSS_008836 | 1000 | 164   | 0 | 0 P   | 24nt upstream of gene PMM1118;                                |

|           |            |      |      |   |       |                                                              |
|-----------|------------|------|------|---|-------|--------------------------------------------------------------|
| 1065756 - | TSS_022609 | 1000 | 6931 | 0 | 90 I  | within gene(s) PMM1119;                                      |
| 1066209 - | TSS_022609 | 1000 |      | 0 | 0 P   | 9nt upstream of gene PMM1119;                                |
| 1068972 - | TSS_022850 | 1000 | 6931 | 0 | 153 I | within gene(s) PMM1121;                                      |
| 1069447 - | TSS_022964 | 1000 | 3699 | 0 | 5 P   | 28nt upstream of gene PMM1121;                               |
| 1070354 - | TSS_022966 | 1000 | 94   | 0 | 1 O   | -                                                            |
| 1070531 + | TSS_008912 | 1000 | 103  | 0 | 1 O   | -                                                            |
| 1071780 - | TSS_022997 | 1000 | 2501 | 0 | 0 I   | within gene(s) PMM1123;                                      |
| 1072201 - | TSS_023072 | 1000 | 1342 | 0 | 18 I  | within gene(s) PMM1123;                                      |
| 1072469 - | TSS_005754 | 1000 |      | 0 | 0 P   | 94nt upstream of gene PMM1123;                               |
| 1073585 - | TSS_023108 | 1000 | 121  | 0 | 0 I   | within gene(s) PMM1124;                                      |
| 1074287 - | TSS_023111 | 1000 | 884  | 0 | 1 I   | within gene(s) PMM1124;                                      |
| 1078286 - | TSS_023121 | 1000 | 1100 | 0 | 4 I   | within gene(s) PMM1127;                                      |
| 1079173 + | TSS_008943 | 1000 | 145  | 0 | 0 Ad  | antisense to gene(s) PMM1128 (19nt downstream);              |
| 1079462 - | TSS_023130 | 1000 | 3850 | 0 | 4 P   | 17nt upstream of gene PMM1128;                               |
| 1082063 - | TSS_023137 | 1000 | 3511 | 0 | 3 O   | -                                                            |
| 1082218 + | TSS_008954 | 1000 | 2814 | 0 | 4 P   | 51nt upstream of gene PMM1132;                               |
| 1083365 - | TSS_023145 | 1000 | 180  | 0 | 1 Ai  | antisense to gene(s) PMM1132;                                |
| 1083716 + | TSS_008966 | 1000 | 181  | 0 | 0 I   | within gene(s) PMM1132;                                      |
| 1084946 - | TSS_023152 | 1000 | 99   | 0 | 4 O   | -                                                            |
| 1085043 + | TSS_008970 | 1000 | 6952 | 0 | 3 P   | 19nt upstream of gene PMM1134;                               |
| 1085641 + | TSS_008983 | 1000 | 8525 | 0 | 3 P   | 15nt upstream of gene PMM1135;                               |
| 1087615 + | TSS_009016 | 1000 | 389  | 0 | 0 O   | -                                                            |
| 1089687 + | TSS_009019 | 1000 | 203  | 0 | 0 I   | within gene(s) PMM1139;                                      |
| 1090775 + | TSS_009021 | 1000 | 879  | 0 | 0 I   | within gene(s) PMM1140;                                      |
| 1095730 + | TSS_009029 | 1000 | 283  | 0 | 0 I   | within gene(s) PMM1142;                                      |
| 1097928 - | TSS_023185 | 1000 | 135  | 0 | 12 I  | within gene(s) PMM1145;                                      |
| 1098690 - | TSS_023221 | 1000 | 124  | 0 | 9 I   | within gene(s) PMM1145;                                      |
| 1098755 - | TSS_023229 | 1000 | 199  | 0 | 3 I   | within gene(s) PMM1145;                                      |
| 1099273 - | TSS_023246 | 1000 | 1018 | 0 | 6 IP  | within gene(s) PMM1147; 96nt upstream of gene PMM1146;       |
| 1100340 - | TSS_023272 | 1000 | 1684 | 0 | 5 P   | 17nt upstream of gene PMM1147;                               |
| 1100440 + | TSS_009046 | 1000 | 339  | 0 | 1 P   | 16nt upstream of gene PMM1148;                               |
| 1101175 + | TSS_009100 | 1000 | 7298 | 0 | 2 P   | 15nt upstream of gene PMM1149;                               |
| 1101469 + | TSS_005889 | 1000 |      | 0 | 0 P   | 8nt upstream of gene PMM1149;                                |
| 1103158 - | TSS_023291 | 1000 | 1965 | 0 | 3 P   | 16nt upstream of gene PMM1151;                               |
| 1103474 - | TSS_023296 | 1000 | 3469 | 0 | 3 O   | -                                                            |
| 1104586 - | TSS_023310 | 1000 | 821  | 0 | 12 IP | within gene(s) PMM1152a; 112nt upstream of gene PMM1152;     |
| 1105595 + | TSS_009199 | 1000 | 1047 | 0 | 5 IP  | within gene(s) PMM1153; 99nt upstream of gene PMM1154;       |
| 1107430 - | TSS_023319 | 1000 | 760  | 0 | 3 P   | 2nt upstream of gene PMM1156;                                |
| 1107587 + | TSS_023319 | 1000 |      | 0 | 0 P   | 26nt upstream of gene PMM1157;                               |
| 1108327 + | TSS_009223 | 1000 | 609  | 0 | 6 I   | within gene(s) PMM1157;                                      |
| 1108805 + | TSS_009254 | 1000 | 3163 | 0 | 8 I   | within gene(s) PMM1158;                                      |
| 1115277 + | TSS_009375 | 1000 | 315  | 0 | 0 O   | -                                                            |
| 1115437 + | TSS_009377 | 1000 | 215  | 0 | 0 O   | -                                                            |
| 1118179 - | TSS_023397 | 1000 | 358  | 0 | 1 P   | 33nt upstream of gene PMM1165;                               |
| 1120049 + | TSS_009386 | 1000 | 1949 | 0 | 1 P   | 15nt upstream of gene PMM1169;                               |
| 1121159 + | TSS_009395 | 1000 | 145  | 0 | 0 Ai  | antisense to gene(s) PMM1171;                                |
| 1121569 - | TSS_023421 | 1000 | 4562 | 0 | 3 P   | 16nt upstream of gene PMM1171;                               |
| 1122779 + | TSS_009398 | 1000 | 188  | 0 | 1 P   | 17nt upstream of gene PMM1174;                               |
| 1122905 + | TSS_009400 | 1000 | 118  | 0 | 1 I   | within gene(s) PMM1174;                                      |
| 1123430 - | TSS_023428 | 1000 | 408  | 0 | 6 Ai  | antisense to gene(s) PMM1175;                                |
| 1124119 + | TSS_009403 | 1000 | 95   | 0 | 0 I   | within gene(s) PMM1176;                                      |
| 1126503 - | TSS_023437 | 1000 | 116  | 0 | 2 I   | within gene(s) PMM1178;                                      |
| 1127018 + | TSS_009408 | 1000 | 1094 | 0 | 1 Ai  | antisense to gene(s) PMM1178;                                |
| 1127288 - | TSS_023442 | 1000 | 138  | 0 | 1 P   | 26nt upstream of gene PMM1178;                               |
| 1127626 + | TSS_009414 | 1000 | 1748 | 0 | 2 Ai  | antisense to gene(s) PMM1179;                                |
| 1128259 + | TSS_009419 | 1000 | 767  | 0 | 1 P   | 28nt upstream of gene PMM1180;                               |
| 1128570 - | TSS_023449 | 1000 | 628  | 0 | 0 Ai  | antisense to gene(s) PMM1180;                                |
| 1130146 + | TSS_009470 | 1000 | 3194 | 0 | 4 P   | 13nt upstream of gene PMM1183;                               |
| 1130398 - | TSS_023454 | 1000 | 294  | 0 | 0 Ai  | antisense to gene(s) PMM1184;                                |
| 1130649 + | TSS_009475 | 1000 | 507  | 0 | 0 IP  | within gene(s) PMM1184; 44nt upstream of gene PMM1185;       |
| 1131150 + | TSS_009479 | 1000 | 4125 | 0 | 3 P   | 29nt upstream of gene PMM1186;                               |
| 1131452 + | TSS_009499 | 1000 | 195  | 0 | 18 I  | within gene(s) PMM1186;                                      |
| 1131719 + | TSS_009506 | 1000 | 756  | 0 | 0 I   | within gene(s) PMM1186;                                      |
| 1131989 + | TSS_009521 | 1000 | 204  | 0 | 4 I   | within gene(s) PMM1186;                                      |
| 1133995 + | TSS_009531 | 1000 | 401  | 0 | 0 I   | within gene(s) PMM1188;                                      |
| 1136337 + | TSS_009539 | 1000 | 686  | 0 | 6 P   | 22nt upstream of gene PMM1190;                               |
| 1136852 + | TSS_009543 | 1000 | 2137 | 0 | 1 P   | 0nt upstream of gene PMM1191;                                |
| 1137382 - | TSS_023471 | 1000 | 377  | 0 | 0 Ai  | antisense to gene(s) PMM1191;                                |
| 1138412 + | TSS_009588 | 1000 | 149  | 0 | 1 I   | within gene(s) PMM1191;                                      |
| 1138845 - | TSS_023478 | 1000 | 155  | 0 | 1 Ai  | antisense to gene(s) PMM1191;                                |
| 1139305 - | TSS_023485 | 1000 | 114  | 0 | 0 I   | within gene(s) PMM1192;                                      |
| 1139830 + | TSS_009604 | 1000 | 186  | 0 | 0 PAi | 95nt upstream of gene PMM1193; antisense to gene(s) PMM1192; |
| 1142062 + | TSS_009608 | 1000 | 126  | 0 | 9 I   | within gene(s) PMM1196;                                      |
| 1150601 - | TSS_023495 | 1000 | 147  | 0 | 0 I   | within gene(s) PMM1202;                                      |
| 1152750 - | TSS_023501 | 1000 | 292  | 0 | 2 I   | within gene(s) PMM1204;                                      |
| 1152998 - | TSS_023503 | 1000 | 126  | 0 | 0 IP  | within gene(s) PMM1205; 88nt upstream of gene PMM1204;       |
| 1153530 - | TSS_023505 | 1000 | 91   | 0 | 0 I   | within gene(s) PMM1205;                                      |
| 1168566 - | TSS_023529 | 1000 | 98   | 0 | 6 O   | -                                                            |
| 1175722 + | TSS_009671 | 1000 | 117  | 0 | 0 I   | within gene(s) PMM1225;                                      |
| 1181446 - | TSS_023536 | 1000 | 167  | 0 | 2 Ai  | antisense to gene(s) PMM1229;                                |

|           |            |      |       |   |    |     |                                                               |
|-----------|------------|------|-------|---|----|-----|---------------------------------------------------------------|
| 1182738 - | TSS_023539 | 1000 | 101   | 0 | 0  | Ai  | antisense to gene(s) PMM1230;                                 |
| 1183984 + | TSS_009678 | 1000 | 433   | 0 | 6  | I   | within gene(s) PMM1232;                                       |
| 1186173 + | TSS_009681 | 1000 | 735   | 0 | 2  | I   | within gene(s) PMM1234;                                       |
| 1186359 - | TSS_023543 | 1000 | 483   | 0 | 1  | Ai  | antisense to gene(s) PMM1234;                                 |
| 1186823 + | TSS_009688 | 1000 | 2510  | 0 | 2  | I   | within gene(s) PMM1234;                                       |
| 1187310 + | TSS_009692 | 1000 | 125   | 0 | 0  | I   | within gene(s) PMM1235;                                       |
| 1192406 + | TSS_009703 | 1000 | 113   | 0 | 3  | IP  | within gene(s) PMM1239; 15nt upstream of gene PMM1240;        |
| 1201748 - | TSS_023557 | 1000 | 140   | 0 | 2  | I   | within gene(s) PMM1249;                                       |
| 1202454 - | TSS_023563 | 1000 | 144   | 0 | 1  | I   | within gene(s) PMM1250;                                       |
| 1203802 + | TSS_009715 | 1000 | 432   | 0 | 0  | Ai  | antisense to gene(s) PMM1251;                                 |
| 1209541 - | TSS_023582 | 1000 | 1404  | 0 | 1  | I   | within gene(s) PMM1256;                                       |
| 1211786 + | TSS_009730 | 1000 | 451   | 0 | 5  | I   | within gene(s) PMM1258;                                       |
| 1212532 + | TSS_009734 | 1000 | 244   | 0 | 0  | IP  | within gene(s) PMM1258; 148nt upstream of gene PMM1259;       |
| 1212906 + | TSS_009735 | 1000 | 604   | 0 | 0  | I   | within gene(s) PMM1259;                                       |
| 1213317 + | TSS_009742 | 1000 | 1295  | 0 | 4  | I   | within gene(s) PMM1259;                                       |
| 1214272 + | TSS_009745 | 1000 | 223   | 0 | 0  | I   | within gene(s) PMM1260;                                       |
| 1214724 + | TSS_009748 | 1000 | 672   | 0 | 0  | IP  | within gene(s) PMM1260; 140nt upstream of gene PMM1261;       |
| 1216927 - | TSS_023617 | 1000 | 17065 | 0 | 1  | P   | 26nt upstream of gene PMM1262;                                |
| 1218465 - | TSS_023642 | 1000 | 331   | 0 | 27 | I   | within gene(s) PMM1264;                                       |
| 1218623 + | TSS_009773 | 1000 | 456   | 0 | 1  | Ai  | antisense to gene(s) PMM1264;                                 |
| 1219792 - | TSS_023740 | 1000 | 1706  | 0 | 10 | P   | 15nt upstream of gene PMM1264;                                |
| 1219908 - | TSS_023746 | 1000 | 174   | 0 | 0  | IP  | within gene(s) PMM1265; 131nt upstream of gene PMM1264;       |
| 1220160 + | TSS_009783 | 1000 | 126   | 0 | 5  | Ai  | antisense to gene(s) PMM1265;                                 |
| 1223096 + | TSS_009793 | 1000 | 116   | 0 | 0  | Ai  | antisense to gene(s) PMM1269;                                 |
| 1223575 - | TSS_023765 | 1000 | 139   | 0 | 3  | I   | within gene(s) PMM1269;                                       |
| 1224017 - | TSS_023771 | 1000 | 3919  | 0 | 10 | P   | 16nt upstream of gene PMM1269;                                |
| 1224107 + | TSS_009796 | 1000 | 445   | 0 | 2  | Ai  | antisense to gene(s) PMM1270;                                 |
| 1224306 - | TSS_023777 | 1000 | 232   | 0 | 3  | I   | within gene(s) PMM1270;                                       |
| 1224483 + | TSS_009801 | 1000 | 1218  | 0 | 1  | Ai  | antisense to gene(s) PMM1270;                                 |
| 1225100 - | TSS_023803 | 1000 | 548   | 0 | 2  | P   | 20nt upstream of gene PMM1270;                                |
| 1226399 + | TSS_009808 | 1000 | 1924  | 0 | 2  | Pai | 139nt upstream of gene PMM1273; antisense to gene(s) PMM1272; |
| 1226493 - | TSS_023810 | 1000 | 8758  | 0 | 2  | P   | 23nt upstream of gene PMM1272;                                |
| 1228488 - | TSS_023814 | 1000 | 106   | 0 | 0  | Ai  | antisense to gene(s) PMM1274;                                 |
| 1228824 + | TSS_009814 | 1000 | 158   | 0 | 0  | P   | 13nt upstream of gene PMM1276;                                |
| 1229056 + | TSS_009815 | 1000 | 182   | 0 | 0  | P   | 15nt upstream of gene PMM1277;                                |
| 1229316 + | TSS_009817 | 1000 | 222   | 0 | 0  | Ai  | antisense to gene(s) PMM1278;                                 |
| 1229883 - | TSS_023821 | 1000 | 161   | 0 | 1  | IP  | within gene(s) PMM1279; 18nt upstream of gene PMM1278;        |
| 1230756 - | TSS_023824 | 1000 | 174   | 0 | 0  | I   | within gene(s) PMM1280;                                       |
| 1231722 - | TSS_023830 | 1000 | 1404  | 0 | 1  | IP  | within gene(s) PMM1281; 194nt upstream of gene PMM1280;       |
| 1233089 + | TSS_009829 | 1000 | 2384  | 0 | 1  | Ai  | antisense to gene(s) PMM1283;                                 |
| 1233817 - | TSS_023952 | 1000 | 47287 | 0 | 8  | P   | 17nt upstream of gene PMM1283;                                |
| 1235226 - | TSS_023964 | 1000 | 957   | 0 | 3  | P   | 16nt upstream of gene PMM1285;                                |
| 1235758 + | TSS_009864 | 1000 | 174   | 0 | 0  | Ai  | antisense to gene(s) PMM1286;                                 |
| 1236777 - | TSS_023996 | 1000 | 3936  | 0 | 7  | P   | 16nt upstream of gene PMM1286;                                |
| 1238666 - | TSS_024013 | 1000 | 115   | 0 | 0  | I   | within gene(s) PMM1287;                                       |
| 1238943 - | TSS_024014 | 1000 | 1584  | 0 | 2  | P   | 24nt upstream of gene PMM1287;                                |
| 1239042 + | TSS_009875 | 1000 | 4547  | 0 | 4  | P   | 27nt upstream of gene PMM1288;                                |
| 1239358 - | TSS_024017 | 1000 | 129   | 0 | 1  | Ai  | antisense to gene(s) PMM1288;                                 |
| 1239822 + | TSS_009912 | 1000 | 177   | 0 | 24 | I   | within gene(s) PMM1288;                                       |
| 1239949 - | TSS_024024 | 1000 | 455   | 0 | 0  | Ai  | antisense to gene(s) PMM1288;                                 |
| 1240190 + | TSS_009919 | 1000 | 257   | 0 | 2  | Ai  | antisense to gene(s) PMM1289;                                 |
| 1240490 - | TSS_024057 | 1000 | 816   | 0 | 9  | I   | within gene(s) PMM1289;                                       |
| 1241067 - | TSS_024102 | 1000 | 11109 | 0 | 2  | P   | 18nt upstream of gene PMM1289;                                |
| 1241474 - | TSS_024109 | 1000 | 144   | 0 | 2  | I   | within gene(s) PMM1290;                                       |
| 1242168 + | TSS_009940 | 1000 | 109   | 0 | 0  | Ai  | antisense to gene(s) PMM1290;                                 |
| 1242445 + | TSS_009941 | 1000 | 290   | 0 | 0  | Ai  | antisense to gene(s) PMM1290;                                 |
| 1243570 - | TSS_024120 | 1000 | 129   | 0 | 0  | Ai  | antisense to gene(s) PMM1291;                                 |
| 1244009 + | TSS_009957 | 1000 | 680   | 0 | 1  | Ai  | antisense to gene(s) PMM1292;                                 |
| 1245509 + | TSS_009960 | 1000 | 1458  | 0 | 0  | P   | 17nt upstream of gene PMM1293;                                |
| 1245700 + | TSS_009975 | 1000 | 749   | 0 | 0  | I   | within gene(s) PMM1293;                                       |
| 1246156 + | TSS_009993 | 1000 |       | 0 | 0  | I   | 17nt upstream of gene PMM1294;                                |
| 1246482 + | TSS_010031 | 1000 | 131   | 0 | 3  | IP  | within gene(s) PMM1294; 248nt upstream of gene PMM1295;       |
| 1247681 - | TSS_024137 | 1000 | 150   | 0 | 0  | P   | 20nt upstream of gene PMM1296;                                |
| 1250117 + | TSS_010040 | 1000 | 161   | 0 | 0  | Ai  | antisense to gene(s) PMM1299;                                 |
| 1250468 - | TSS_024147 | 1000 | 401   | 0 | 4  | I   | within gene(s) PMM1299;                                       |
| 1251088 + | TSS_010042 | 1000 | 380   | 0 | 0  | P   | 15nt upstream of gene PMM1300;                                |
| 1252379 + | TSS_010051 | 1000 | 100   | 0 | 0  | I   | within gene(s) PMM1300;                                       |
| 1252727 - | TSS_024172 | 1000 | 5644  | 0 | 5  | O   | -                                                             |
| 1252970 + | TSS_010065 | 1000 | 827   | 0 | 1  | P   | 32nt upstream of gene PMM1301;                                |
| 1253102 + | TSS_010066 | 1000 | 251   | 0 | 0  | I   | within gene(s) PMM1301;                                       |
| 1256224 + | TSS_010078 | 1000 | 152   | 0 | 1  | Ai  | antisense to gene(s) PMM1303;                                 |
| 1258142 - | TSS_024189 | 1000 | 195   | 0 | 12 | P   | 16nt upstream of gene PMM1304;                                |
| 1258258 + | TSS_010083 | 1000 | 560   | 0 | 6  | P   | 151nt upstream of gene PMM1305;                               |
| 1259122 - | TSS_024197 | 1000 | 254   | 0 | 1  | Ai  | antisense to gene(s) PMM1305;                                 |
| 1260859 + | TSS_010105 | 1000 |       | 0 | 0  | IP  | within gene(s) PMM1306; 33nt upstream of gene PMM1307;        |
| 1262176 + | TSS_010112 | 1000 | 1504  | 0 | 2  | P   | 26nt upstream of gene PMM1309;                                |
| 1263425 - | TSS_024217 | 1000 | 567   | 0 | 1  | O   | -                                                             |
| 1263674 + | TSS_010205 | 1000 | 2229  | 0 | 2  | I   | within gene(s) PMM1310;                                       |
| 1265561 + | TSS_010215 | 1000 | 25275 | 0 | 4  | I   | within gene(s) PMM1312;                                       |
| 1266213 - | TSS_024227 | 1000 | 308   | 0 | 1  | Ai  | antisense to gene(s) PMM1312;                                 |

|           |            |      |        |         |       |                                                         |
|-----------|------------|------|--------|---------|-------|---------------------------------------------------------|
| 1266690 + | TSS_010272 | 1000 | 25778  | 0       | 4 P   | 20nt upstream of gene PMM1313;                          |
| 1268104 + | TSS_010459 | 1000 | 1220   | 0       | 1 P   | 24nt upstream of gene PMM1315;                          |
| 1270161 + | TSS_010510 | 1000 | 153    | 0       | 4 P   | 15nt upstream of gene PMM1317;                          |
| 1272067 - | TSS_017393 | 1000 | 159813 | 0       | 8 P   | 65nt upstream of gene PMM1321;                          |
| 1273518 - | TSS_024265 | 1000 | 283    | 0       | 1 Ai  | antisense to gene(s) PMM1322;                           |
| 1275301 - | TSS_024272 | 1000 | 212    | 0       | 0 Ai  | antisense to gene(s) PMM1323;                           |
| 1275591 + | TSS_010536 | 1000 | 220    | 0       | 0 I   | within gene(s) PMM1323;                                 |
| 1276011 - | TSS_024274 | 1000 | 685    | 0       | 3 Ai  | antisense to gene(s) PMM1323;                           |
| 1276210 + | TSS_010540 | 1000 | 466    | 0       | 0 I   | within gene(s) PMM1324;                                 |
| 1276620 - | TSS_024279 | 1000 | 306    | 0       | 0 Ai  | antisense to gene(s) PMM1324;                           |
| 1276641 + | TSS_010546 | 1000 | 493    | 0       | 0 I   | within gene(s) PMM1324;                                 |
| 1278318 + | TSS_010553 | 1000 | 437    | 0       | 0 IP  | within gene(s) PMM1326; 106nt upstream of gene PMM1327; |
| 1281106 - | TSS_024296 | 1000 | 750    | 0       | 1 IP  | within gene(s) PMM1330; 132nt upstream of gene PMM1329; |
| 1281349 - | TSS_024299 | 1000 | 99     | 0       | 1 P   | 30nt upstream of gene PMM1330;                          |
| 1284193 - | TSS_024308 | 1000 | 147    | 0       | 0 I   | within gene(s) PMM1333;                                 |
| 1285667 - | TSS_024311 | 1000 | 163    | 0       | 3 I   | within gene(s) PMM1335;                                 |
| 1285747 - | TSS_024313 | 1000 | 248    | 0       | 0 I   | within gene(s) PMM1335;                                 |
| 1286762 + | TSS_010588 | 1000 | 170    | 0       | 1 Ai  | antisense to gene(s) PMM1337;                           |
| 1287887 - | TSS_024329 | 1000 | 468    | 0       | 1 I   | within gene(s) PMM1338;                                 |
| 1287977 - | TSS_024330 | 1000 | 190    | 0       | 0 I   | within gene(s) PMM1338;                                 |
| 1288162 + | TSS_010595 | 1000 | 171    | 0       | 0 Ai  | antisense to gene(s) PMM1338;                           |
| 1288975 - | TSS_024341 | 1000 | 158    | 0       | 0 I   | within gene(s) PMM1338;                                 |
| 1289984 - | TSS_024349 | 1000 | 118    | 0       | 0 I   | within gene(s) PMM1339;                                 |
| 1291318 - | TSS_024357 | 1000 | 177    | 0       | 0 Ai  | antisense to gene(s) PMM1340;                           |
| 1291478 + | TSS_010606 | 1000 | 1516   | 0       | 2 I   | within gene(s) PMM1340;                                 |
| 1291709 - | TSS_024359 | 1000 | 113    | 0       | 0 Ai  | antisense to gene(s) PMM1340;                           |
| 1293438 + | TSS_010632 | 1000 | 173    | 0       | 7 I   | within gene(s) PMM1341;                                 |
| 1293604 + | TSS_010636 | 1000 | 130    | 0       | 0 I   | within gene(s) PMM1341;                                 |
| 1293828 + | TSS_010638 | 1000 | 137    | 0       | 2 I   | within gene(s) PMM1341;                                 |
| 1294828 - | TSS_024392 | 1000 | 176    | 0       | 6 I   | within gene(s) PMM1342;                                 |
| 1295467 - | TSS_024423 | 1000 | 145    | 0       | 6 I   | within gene(s) PMM1342;                                 |
| 1295547 - | TSS_024426 | 1000 | 203    | 0       | 6 P   | 38nt upstream of gene PMM1342;                          |
| 1295966 + | TSS_010643 | 1000 | 258    | 0       | 2 P   | 75nt upstream of gene PMM1344;                          |
| 1296395 + | TSS_010652 | 1000 | 620    | 0       | 6 IP  | within gene(s) PMM1344; 96nt upstream of gene PMM1345;  |
| 1299151 + | TSS_010661 | 1000 | 568    | 0       | 0 Ai  | antisense to gene(s) PMM1348;                           |
| 1299740 + | TSS_010662 | 1000 | 735    | 0       | 0 P   | 25nt upstream of gene PMM1349;                          |
| 1300005 + | TSS_010667 | 1000 | 211    | 0       | 5 I   | within gene(s) PMM1349;                                 |
| 1300764 + | TSS_010676 | 1000 | 612    | 0       | 0 I   | within gene(s) PMM1350;                                 |
| 1302130 - | TSS_024482 | 1000 | 19481  | 0       | 2 P   | 33nt upstream of gene PMM1352;                          |
| 1304765 - | TSS_024542 | 1000 | 554    | 0       | 0 P   | 19nt upstream of gene PMM1354;                          |
| 1307622 + | TSS_010718 | 1000 | 428    | 0       | 2 O   | -                                                       |
| 1309146 - | TSS_024552 | 1000 | 164    | 0       | 0 I   | within gene(s) PMM1360;                                 |
| 1309784 + | TSS_010720 | 1000 | 91     | 0       | 2 P   | 56nt upstream of gene PMM1361;                          |
| 1313108 + | TSS_010730 | 1000 | 647    | 0       | 2 P   | 16nt upstream of gene PMM1365;                          |
| 1315214 + | TSS_010748 | 1000 | 95     | 0       | 2 Ai  | antisense to gene(s) PMM1368;                           |
| 1315509 - | TSS_024565 | 1000 | 1055   | 0       | 7 P   | 15nt upstream of gene PMM1368;                          |
| 1315687 - | TSS_024573 | 1000 | 107    | 0       | 0 IP  | within gene(s) PMM1369; 193nt upstream of gene PMM1368; |
| 1318282 - | TSS_024583 | 1000 | 504    | 0       | 3 O   | -                                                       |
| 1319591 + | TSS_010759 | 1000 | 2002   | 0       | 2 O   | -                                                       |
| 1319966 + | TSS_010766 | 1000 | 689    | 0       | 2 P   | 13nt upstream of gene PMM1372;                          |
| 1321010 + | TSS_010771 | 1000 | 6369   | 0       | 2 O   | -                                                       |
| 1322462 - | TSS_024590 | 1000 | 261    | 0       | 0 O   | -                                                       |
| 1323807 + | TSS_010782 | 1000 | 134    | 0       | 6 P   | 34nt upstream of gene PMM1376;                          |
| 1324248 + | TSS_010788 | 1000 | 301    | 0       | 0 P   | 19nt upstream of gene PMM1377;                          |
| 1324447 + | TSS_010789 | 1000 | 22     | 9.4E-14 | 3 I   | within gene(s) PMM1377;                                 |
| 1326668 - | TSS_024599 | 1000 | 1198   | 0       | 1 O   | -                                                       |
| 1328956 - | TSS_024603 | 1000 | 491    | 0       | 0 O   | -                                                       |
| 1330723 - | TSS_024606 | 1000 | 189    | 0       | 0 Ai  | antisense to gene(s) PMM1381;                           |
| 1332432 + | TSS_010813 | 1000 | 250    | 0       | 0 O   | -                                                       |
| 1332932 - | TSS_024612 | 1000 | 135    | 0       | 2 I   | within gene(s) PMM1383;                                 |
| 1333562 - | TSS_024617 | 1000 | 147    | 0       | 2 P   | 188nt upstream of gene PMM1383;                         |
| 1334143 + | TSS_010816 | 1000 | 644    | 0       | 0 O   | -                                                       |
| 1334592 + | TSS_007415 | 1000 | 0      | 0       | 5 P   | 21nt upstream of gene PMM1384;                          |
| 1335359 + | TSS_010827 | 1000 | 1705   | 0       | 1 O   | -                                                       |
| 1336436 + | TSS_010831 | 1000 | 883    | 0       | 2 O   | -                                                       |
| 1338319 - | TSS_024627 | 1000 | 122    | 0       | 5 Ai  | antisense to gene(s) PMM1386;                           |
| 1338981 + | TSS_010838 | 1000 | 252    | 0       | 2 P   | 17nt upstream of gene PMM1387;                          |
| 1339834 - | TSS_024631 | 1000 | 509    | 0       | 1 P   | 32nt upstream of gene PMM1388;                          |
| 1341205 - | TSS_024640 | 1000 | 476    | 0       | 1 P   | 20nt upstream of gene PMM1390;                          |
| 1341449 + | TSS_010843 | 1000 | 237    | 0       | 0 P   | 15nt upstream of gene PMM1391;                          |
| 1343374 + | TSS_010846 | 1000 | 169    | 0       | 0 I   | within gene(s) PMM1394;                                 |
| 1343856 - | TSS_024644 | 1000 | 1921   | 0       | 7 O   | -                                                       |
| 1344024 - | TSS_024649 | 1000 | 426    | 0       | 3 O   | -                                                       |
| 1345064 - | TSS_024667 | 1000 | 771    | 0       | 2 I   | within gene(s) PMM1396;                                 |
| 1345256 - | TSS_024696 | 1000 | 1262   | 0       | 10 IP | within gene(s) PMM1397; 189nt upstream of gene PMM1396; |
| 1345690 - | TSS_024748 | 1000 | 57347  | 0       | 5 P   | 16nt upstream of gene PMM1399;                          |
| 1346865 - | TSS_024786 | 1000 | 13348  | 0       | 3 P   | 239nt upstream of gene PMM1400;                         |
| 1346985 + | TSS_010866 | 1000 | 271    | 0       | 0 P   | 146nt upstream of gene PMM1401;                         |
| 1347056 + | TSS_010868 | 1000 | 281    | 0       | 2 P   | 75nt upstream of gene PMM1401;                          |
| 1347115 + | TSS_010871 | 1000 | 1475   | 0       | 2 P   | 16nt upstream of gene PMM1401;                          |



|           |            |      |      |   |      |                                                         |
|-----------|------------|------|------|---|------|---------------------------------------------------------|
| 1350449 - | TSS_024796 | 1000 | 517  | 0 | 3 P  | 81nt upstream of gene PMM1404;                          |
| 1351013 - | TSS_024800 | 1000 | 979  | 0 | 3 P  | 26nt upstream of gene PMM1405;                          |
| 1352055 - | TSS_024805 | 1000 | 196  | 0 | 0 P  | 24nt upstream of gene PMM1408;                          |
| 1352429 - | TSS_024811 | 1000 | 3746 | 0 | 3 P  | 18nt upstream of gene PMM1409;                          |
| 1353625 - | TSS_024830 | 1000 | 480  | 0 | 10 O | -                                                       |
| 1353716 - | TSS_024834 | 1000 | 1700 | 0 | 1 O  | -                                                       |
| 1355165 + | TSS_010926 | 1000 | 1806 | 0 | 3 P  | 17nt upstream of gene PMM1413;                          |
| 1355538 - | TSS_024841 | 1000 | 203  | 0 | 0 O  | -                                                       |
| 1355578 + | TSS_010932 | 1000 | 308  | 0 | 6 P  | 14nt upstream of gene PMM1414;                          |
| 1355765 + | TSS_010935 | 1000 | 94   | 0 | 1 IP | within gene(s) PMM1414; 230nt upstream of gene PMM1415; |
| 1356437 - | TSS_024843 | 1000 | 252  | 0 | 0 Ai | antisense to gene(s) PMM1415;                           |
| 1356695 + | TSS_010938 | 1000 | 150  | 0 | 1 I  | within gene(s) PMM1415;                                 |
| 1358558 + | TSS_010961 | 1000 | 139  | 0 | 0 I  | within gene(s) PMM1416;                                 |
| 1358652 + | TSS_010966 | 1000 | 1078 | 0 | 1 I  | within gene(s) PMM1416;                                 |
| 1358898 - | TSS_024858 | 1000 | 399  | 0 | 0 Ai | antisense to gene(s) PMM1416;                           |
| 1359810 - | TSS_024867 | 1000 | 143  | 0 | 6 Ai | antisense to gene(s) PMM1416;                           |
| 1360185 - | TSS_024876 | 1000 | 2438 | 0 | 2 O  | -                                                       |
| 1362875 + | TSS_010989 | 1000 | 417  | 0 | 0 Ai | antisense to gene(s) PMM1421 PMM1422;                   |
| 1363264 - | TSS_024893 | 1000 | 180  | 0 | 15 I | within gene(s) PMM1422;                                 |
| 1363417 - | TSS_024895 | 1000 | 229  | 0 | 0 P  | 27nt upstream of gene PMM1422;                          |
| 1364352 - | TSS_024900 | 1000 | 1435 | 0 | 0 P  | 202nt upstream of gene PMM1424;                         |
| 1364483 + | TSS_010993 | 1000 | 103  | 0 | 0 O  | -                                                       |
| 1366152 - | TSS_024904 | 1000 | 196  | 0 | 2 Ai | antisense to gene(s) PMM1425;                           |
| 1366222 - | TSS_024905 | 1000 | 181  | 0 | 0 Ai | antisense to gene(s) PMM1425;                           |
| 1367108 + | TSS_011000 | 1000 | 0    | 0 | 0 P  | 18nt upstream of gene PMM1427;                          |
| 1367587 + | TSS_011006 | 1000 | 363  | 0 | 2 P  | 92nt upstream of gene PMM1428;                          |
| 1367686 + | TSS_011008 | 1000 | 207  | 0 | 0 I  | within gene(s) PMM1428;                                 |
| 1369350 - | TSS_024909 | 1000 | 91   | 0 | 2 P  | 19nt upstream of gene PMM1431;                          |
| 1369959 + | TSS_011016 | 1000 | 410  | 0 | 1 I  | within gene(s) PMM1432;                                 |
| 1370154 - | TSS_024914 | 1000 | 124  | 0 | 0 Ai | antisense to gene(s) PMM1432;                           |
| 1371646 + | TSS_007561 | 1000 | 854  | 0 | 4 P  | 31nt upstream of gene PMM1434;                          |
| 1371875 + | TSS_011034 | 1000 | 251  | 0 | 24 I | within gene(s) PMM1434;                                 |
| 1372149 - | TSS_024925 | 1000 | 2093 | 0 | 2 Ai | antisense to gene(s) PMM1434;                           |
| 1373308 + | TSS_007573 | 1000 | 3164 | 0 | 4 P  | 17nt upstream of gene PMM1435;                          |
| 1374729 + | TSS_011085 | 1000 | 592  | 0 | 2 Ai | antisense to gene(s) PMM1436;                           |
| 1374822 + | TSS_011088 | 1000 | 614  | 0 | 4 Ai | antisense to gene(s) PMM1436;                           |
| 1375708 - | TSS_025122 | 1000 | 0    | 0 | 4 P  | 71nt upstream of gene PMM1437;                          |
| 1375811 + | TSS_011104 | 1000 | 261  | 0 | 3 P  | 47nt upstream of gene PMM1438;                          |
| 1378269 - | TSS_025142 | 1000 | 847  | 0 | 3 P  | 18nt upstream of gene PMM1440;                          |
| 1379477 + | TSS_011126 | 1000 | 3808 | 0 | 7 Ai | antisense to gene(s) PMM1442;                           |
| 1379556 + | TSS_011129 | 1000 | 1065 | 0 | 0 Ai | antisense to gene(s) PMM1442;                           |
| 1379949 + | TSS_011131 | 1000 | 272  | 0 | 0 P  | 27nt upstream of gene PMM1443;                          |
| 1380027 + | TSS_011134 | 1000 | 605  | 0 | 0 I  | within gene(s) PMM1443;                                 |
| 1380210 + | TSS_011135 | 1000 | 97   | 0 | 3 I  | within gene(s) PMM1443;                                 |
| 1380876 + | TSS_011155 | 1000 | 2412 | 0 | 2 IP | within gene(s) PMM1443; 80nt upstream of gene PMM1444;  |
| 1382749 + | TSS_011168 | 1000 | 113  | 0 | 1 IP | within gene(s) PMM1445; 31nt upstream of gene PMM1446;  |
| 1385792 + | TSS_011176 | 1000 | 247  | 0 | 3 Ai | antisense to gene(s) PMM1449;                           |
| 1386056 - | TSS_025179 | 1000 | 177  | 0 | 1 I  | within gene(s) PMM1449;                                 |
| 1386700 + | TSS_011180 | 1000 | 616  | 0 | 0 Ai | antisense to gene(s) PMM1450;                           |
| 1387066 + | TSS_011182 | 1000 | 216  | 0 | 1 Ai | antisense to gene(s) PMM1451;                           |
| 1388669 - | TSS_025213 | 1000 | 164  | 0 | 0 IP | within gene(s) PMM1452; 88nt upstream of gene PMM1451;  |
| 1389346 - | TSS_025215 | 1000 | 114  | 0 | 3 IP | within gene(s) PMM1453; 191nt upstream of gene PMM1452; |
| 1390543 - | TSS_018403 | 1000 | 0    | 0 | 0 P  | 104nt upstream of gene PMM1455;                         |
| 1392965 - | TSS_025226 | 1000 | 175  | 0 | 0 Ai | antisense to gene(s) PMM1458;                           |
| 1393186 + | TSS_011202 | 1000 | 321  | 0 | 0 I  | within gene(s) PMM1458;                                 |
| 1393368 + | TSS_011204 | 1000 | 1495 | 0 | 1 P  | 69nt upstream of gene PMM1459;                          |
| 1395953 + | TSS_011213 | 1000 | 718  | 0 | 5 P  | 14nt upstream of gene PMM1462;                          |
| 1396223 + | TSS_011223 | 1000 | 4100 | 0 | 4 P  | 14nt upstream of gene PMM1463;                          |
| 1397666 + | TSS_011241 | 1000 | 5215 | 0 | 2 P  | 16nt upstream of gene PMM1465;                          |
| 1398489 + | TSS_011316 | 1000 | 435  | 0 | 78 I | within gene(s) PMM1465;                                 |
| 1401712 - | TSS_025249 | 1000 | 184  | 0 | 0 I  | within gene(s) PMM1467;                                 |
| 1403187 - | TSS_025257 | 1000 | 1477 | 0 | 1 P  | 46nt upstream of gene PMM1467;                          |
| 1410409 - | TSS_025271 | 1000 | 220  | 0 | 1 I  | within gene(s) PMM1476;                                 |
| 1411585 - | TSS_025306 | 1000 | 6030 | 0 | 10 P | 26nt upstream of gene PMM1479;                          |
| 1412048 + | TSS_011368 | 1000 | 265  | 0 | 0 Ai | antisense to gene(s) PMM1480;                           |
| 1412609 - | TSS_025312 | 1000 | 364  | 0 | 0 P  | 161nt upstream of gene PMM1480;                         |
| 1413912 + | TSS_011371 | 1000 | 1221 | 0 | 6 O  | -                                                       |
| 1414968 - | TSS_025357 | 1000 | 323  | 0 | 10 I | within gene(s) PMM1483;                                 |
| 1415400 - | TSS_025394 | 1000 | 371  | 0 | 12 I | within gene(s) PMM1483;                                 |
| 1416227 - | TSS_025447 | 1000 | 511  | 0 | 3 I  | within gene(s) PMM1483;                                 |
| 1416999 - | TSS_025496 | 1000 | 1049 | 0 | 16 I | within gene(s) PMM1483;                                 |
| 1417887 - | TSS_025560 | 1000 | 200  | 0 | 9 I  | within gene(s) PMM1483;                                 |
| 1418150 + | TSS_011401 | 1000 | 685  | 0 | 1 Ai | antisense to gene(s) PMM1484;                           |
| 1418507 + | TSS_011408 | 1000 | 2551 | 0 | 1 Ai | antisense to gene(s) PMM1484;                           |
| 1419267 - | TSS_025636 | 1000 | 403  | 0 | 9 I  | within gene(s) PMM1484;                                 |
| 1420706 - | TSS_025705 | 1000 | 854  | 0 | 1 I  | within gene(s) PMM1485;                                 |
| 1420978 - | TSS_025720 | 1000 | 339  | 0 | 0 I  | within gene(s) PMM1485;                                 |
| 1421293 - | TSS_025730 | 1000 | 190  | 0 | 1 I  | within gene(s) PMM1485;                                 |
| 1422856 - | TSS_025770 | 1000 | 978  | 0 | 0 I  | within gene(s) PMM1485;                                 |
| 1423046 - | TSS_025773 | 1000 | 283  | 0 | 0 I  | within gene(s) PMM1485;                                 |

|           |            |      |       |   |       |                                                                         |
|-----------|------------|------|-------|---|-------|-------------------------------------------------------------------------|
| 1423524 - | TSS_025776 | 1000 | 276   | 0 | 4 P   | 211nt upstream of gene PMM1485;                                         |
| 1423961 + | TSS_011452 | 1000 | 556   | 0 | 1 Ai  | antisense to gene(s) PMM1486;                                           |
| 1424666 - | TSS_025783 | 1000 | 134   | 0 | 2 P   | 20nt upstream of gene PMM1487;                                          |
| 1427278 + | TSS_011466 | 1000 | 477   | 0 | 2 Ai  | antisense to gene(s) PMM1490;                                           |
| 1428507 + | TSS_011471 | 1000 | 341   | 0 | 0 IP  | within gene(s) PMM1491; 98nt upstream of gene PMM1492;                  |
| 1429727 + | TSS_011531 | 1000 | 488   | 0 | 3 I   | within gene(s) PMM1492;                                                 |
| 1431135 + | TSS_011558 | 1000 | 622   | 0 | 7 I   | within gene(s) PMM1494;                                                 |
| 1431241 + | TSS_011563 | 1000 | 303   | 0 | 6 I   | within gene(s) PMM1494;                                                 |
| 1431469 + | TSS_011575 | 1000 | 265   | 0 | 3 I   | within gene(s) PMM1494;                                                 |
| 1433023 + | TSS_011635 | 1000 | 711   | 0 | 7 I   | within gene(s) PMM1494;                                                 |
| 1433296 + | TSS_011641 | 1000 | 486   | 0 | 0 I   | within gene(s) PMM1494;                                                 |
| 1435445 + | TSS_011653 | 1000 | 156   | 0 | 0 I   | within gene(s) PMM1496;                                                 |
| 1436999 + | TSS_011655 | 1000 | 753   | 0 | 0 P   | 24nt upstream of gene PMM1498;                                          |
| 1437357 - | TSS_025849 | 1000 | 510   | 0 | 1 Ai  | antisense to gene(s) PMM1498;                                           |
| 1439023 - | TSS_025856 | 1000 | 985   | 0 | 0 I   | within gene(s) PMM1499;                                                 |
| 1439138 + | TSS_011706 | 1000 | 237   | 0 | 1 Ai  | antisense to gene(s) PMM1500;                                           |
| 1439422 - | TSS_025879 | 1000 | 354   | 0 | 0 I   | within gene(s) PMM1500;                                                 |
| 1440154 - | TSS_025922 | 1000 | 169   | 0 | 1 I   | within gene(s) PMM1500;                                                 |
| 1440282 - | TSS_025928 | 1000 | 1598  | 0 | 2 P   | 23nt upstream of gene PMM1500;                                          |
| 1440561 + | TSS_011717 | 1000 | 112   | 0 | 0 I   | within gene(s) PMM1501;                                                 |
| 1441843 + | TSS_011722 | 1000 | 1512  | 0 | 3 I   | within gene(s) PMM1501;                                                 |
| 1443305 + | TSS_011729 | 1000 | 644   | 0 | 4 PAI | 201nt upstream of gene PMM1504; antisense to gene(s) PMM1503;           |
| 1446946 + | TSS_011755 | 1000 | 773   | 0 | 8 Ai  | antisense to gene(s) PMM1508;                                           |
| 1447690 - | TSS_026094 | 1000 | 1177  | 0 | 4 IP  | within gene(s) PMM1509; 61nt upstream of gene PMM1508;                  |
| 1447936 - | TSS_026113 | 1000 | 4556  | 0 | 7 I   | within gene(s) PMM1509;                                                 |
| 1448025 - | TSS_026120 | 1000 | 789   | 0 | 7 I   | within gene(s) PMM1509;                                                 |
| 1448485 - | TSS_026157 | 1000 | 1112  | 0 | 45 I  | within gene(s) PMM1509;                                                 |
| 1449812 - | TSS_026256 | 1000 | 1581  | 0 | 5 P   | 64nt upstream of gene PMM1509;                                          |
| 1450432 - | TSS_026274 | 1000 | 604   | 0 | 5 IP  | within gene(s) PMM1511; 109nt upstream of gene PMM1510;                 |
| 1450752 - | TSS_026278 | 1000 | 187   | 0 | 5 P   | 25nt upstream of gene PMM1511;                                          |
| 1450891 + | TSS_011781 | 1000 | 119   | 0 | 5 P   | 31nt upstream of gene PMM1512;                                          |
| 1454166 + | TSS_011834 | 1000 | 273   | 0 | 2 I   | within gene(s) PMM1512;                                                 |
| 1454543 + | TSS_011846 | 1000 | 232   | 0 | 0 I   | within gene(s) PMM1512;                                                 |
| 1456713 - | TSS_019390 | 1000 | 5241  | 0 | 4 P   | 20nt upstream of gene PMM1514;                                          |
| 1459395 - | TSS_026307 | 1000 | 187   | 0 | 0 Ai  | antisense to gene(s) PMM1518;                                           |
| 1460021 - | TSS_026313 | 1000 | 458   | 0 | 1 I   | within gene(s) PMM1519;                                                 |
| 1460363 - | TSS_026317 | 1000 | 1678  | 0 | 3 P   | 15nt upstream of gene PMM1520;                                          |
| 1462416 - | TSS_026376 | 1000 | 1224  | 0 | 39 I  | within gene(s) PMM1523;                                                 |
| 1464296 - | TSS_026610 | 1000 | 388   | 0 | 14 IP | within gene(s) PMM1524; 163nt upstream of gene PMM1523;                 |
| 1465661 - | TSS_019863 | 1000 | 2937  | 0 | 33 I  | within gene(s) PMM1524;                                                 |
| 1466574 - | TSS_026889 | 1000 | 40164 | 0 | 2 P   | 109nt upstream of gene PMM1524;                                         |
| 1468533 - | TSS_026896 | 1000 | 176   | 0 | 0 Ai  | antisense to gene(s) PMM1525;                                           |
| 1468704 + | TSS_011939 | 1000 | 134   | 0 | 7 P   | 21nt upstream of gene PMM1526;                                          |
| 1469172 + | TSS_011941 | 1000 | 346   | 0 | 0 I   | within gene(s) PMM1526;                                                 |
| 1469928 - | TSS_026900 | 1000 | 158   | 0 | 0 I   | within gene(s) PMM1527;                                                 |
| 1470954 + | TSS_011946 | 1000 | 518   | 0 | 2 P   | 15nt upstream of gene PMM1528;                                          |
| 1471756 + | TSS_011950 | 1000 | 232   | 0 | 0 Ai  | antisense to gene(s) PMM1529;                                           |
| 1473040 - | TSS_026921 | 1000 | 165   | 0 | 7 IP  | within gene(s) PMM1531; 169nt upstream of gene PMM1530;                 |
| 1473409 - | TSS_019991 | 1000 | 124   | 0 | 6 IP  | within gene(s) PMM1532; 114nt upstream of gene PMM1531;                 |
| 1473764 - | TSS_026938 | 1000 | 521   | 0 | 4 P   | 28nt upstream of gene PMM1532;                                          |
| 1474126 - | TSS_026941 | 1000 | 284   | 0 | 1 I   | within gene(s) PMM1533;                                                 |
| 1475305 - | TSS_026961 | 1000 | 501   | 0 | 0 I   | within gene(s) PMM1535;                                                 |
| 1475507 - | TSS_026966 | 1000 | 256   | 0 | 0 I   | within gene(s) PMM1535;                                                 |
| 1477037 - | TSS_027000 | 1000 | 1892  | 0 | 2 P   | 21nt upstream of gene PMM1538;                                          |
| 1479684 + | TSS_011971 | 1000 | 975   | 0 | 0 Ai  | antisense to gene(s) PMM1542;                                           |
| 1480004 - | TSS_027028 | 1000 | 736   | 0 | 19 I  | within gene(s) PMM1542;                                                 |
| 1480604 - | TSS_027069 | 1000 | 1050  | 0 | 10 IP | within gene(s) PMM1544; 178nt upstream of gene PMM1543;                 |
| 1482034 - | TSS_027146 | 1000 | 159   | 0 | 0 IP  | within gene(s) PMM1547; 93nt upstream of gene PMM1546;                  |
| 1484971 - | TSS_027231 | 1000 | 217   | 0 | 2 IP  | within gene(s) PMM1554; 134nt upstream of gene PMM1553;                 |
| 1485370 - | TSS_027241 | 1000 | 354   | 0 | 0 I   | within gene(s) PMM1555;                                                 |
| 1486430 - | TSS_027269 | 1000 | 141   | 0 | 0 IP  | within gene(s) PMM1557; 94nt upstream of gene PMM1556;                  |
| 1487844 - | TSS_027287 | 1000 | 97    | 0 | 1 P   | 229nt upstream of gene PMM1558;                                         |
| 1487895 + | TSS_012035 | 1000 | 348   | 0 | 6 P   | 13nt upstream of gene PMM1559;                                          |
| 1490373 + | TSS_012048 | 1000 | 7393  | 0 | 2 P   | 85nt upstream of gene PMM1562;                                          |
| 1490794 + | TSS_012124 | 1000 | 1906  | 0 | 68 I  | within gene(s) PMM1562;                                                 |
| 1491478 + | TSS_012250 | 1000 | 931   | 0 | 69 I  | within gene(s) PMM1562;                                                 |
| 1491832 - | TSS_027323 | 1000 | 114   | 0 | 2 P   | 14nt upstream of gene PMM1563;                                          |
| 1494808 - | TSS_027330 | 1000 | 123   | 0 | 3 I   | within gene(s) PMM1566;                                                 |
| 1495329 + | TSS_012277 | 1000 | 2329  | 0 | 5 Ai  | antisense to gene(s) PMM1566;                                           |
| 1495758 - | TSS_027334 | 1000 | 695   | 0 | 2 PAI | 19nt upstream of gene PMM1566; antisense to gene(s) PMM1567;            |
| 1496620 + | TSS_012281 | 1000 | 954   | 0 | 0 IAd | within gene(s) PMM1567; antisense to gene(s) PMM1568 (11nt downstream); |
| 1497016 - | TSS_027352 | 1000 | 6133  | 0 | 9 P   | 21nt upstream of gene PMM1568;                                          |
| 1497103 - | TSS_027356 | 1000 | 168   | 0 | 2 P   | 108nt upstream of gene PMM1568;                                         |
| 1499500 - | TSS_027366 | 1000 | 134   | 0 | 2 I   | within gene(s) PMM1570;                                                 |
| 1499639 - | TSS_027371 | 1000 | 966   | 0 | 2 P   | 33nt upstream of gene PMM1570;                                          |
| 1499646 + | TSS_012298 | 1000 | 488   | 0 | 14 P  | 71nt upstream of gene PMM1571;                                          |
| 1501198 + | TSS_012307 | 1000 | 127   | 0 | 0 Ai  | antisense to gene(s) PMM1573;                                           |
| 1502320 - | TSS_027377 | 1000 | 91    | 0 | 0 I   | within gene(s) PMM1574;                                                 |
| 1503685 - | TSS_027398 | 1000 | 155   | 0 | 3 I   | within gene(s) PMM1575;                                                 |
| 1504039 - | TSS_027414 | 1000 | 140   | 0 | 3 I   | within gene(s) PMM1575;                                                 |

|           |            |      |       |   |       |                                                               |
|-----------|------------|------|-------|---|-------|---------------------------------------------------------------|
| 1505392 - | TSS_027438 | 1000 | 107   | 0 | 1 I   | within gene(s) PMM1575;                                       |
| 1505706 - | TSS_027443 | 1000 | 519   | 0 | 0 I   | within gene(s) PMM1575;                                       |
| 1507214 - | TSS_027453 | 1000 | 97    | 0 | 11 I  | within gene(s) PMM1577;                                       |
| 1508411 - | TSS_027459 | 1000 | 790   | 0 | 2 P   | 11nt upstream of gene PMM1577;                                |
| 1508903 - | TSS_027468 | 1000 | 7339  | 0 | 6 P   | 21nt upstream of gene PMM1578;                                |
| 1511027 + | TSS_012327 | 1000 | 710   | 0 | 0 Ai  | antisense to gene(s) PMM1580;                                 |
| 1511176 + | TSS_012328 | 1000 | 120   | 0 | 0 Ai  | antisense to gene(s) PMM1580;                                 |
| 1512795 - | TSS_027487 | 1000 | 451   | 0 | 2 P   | 92nt upstream of gene PMM1581;                                |
| 1513707 - | TSS_027493 | 1000 | 898   | 0 | 1 Ai  | antisense to gene(s) PMM1582;                                 |
| 1515544 - | TSS_027497 | 1000 | 331   | 0 | 0 I   | within gene(s) PMM1585;                                       |
| 1518093 - | TSS_020891 | 1000 |       | 0 | 3 I   | 51nt upstream of gene PMM1588;                                |
| 1518815 - | TSS_027523 | 1000 | 346   | 0 | 7 I   | within gene(s) PMM1589;                                       |
| 1519244 - | TSS_020908 | 1000 | 1735  | 0 | 1 P   | 24nt upstream of gene PMM1589;                                |
| 1523398 - | TSS_027547 | 1000 | 145   | 0 | 0 I   | within gene(s) PMM1594;                                       |
| 1523570 - | TSS_027549 | 1000 | 1173  | 0 | 0 P   | 23nt upstream of gene PMM1594;                                |
| 1523718 - | TSS_027550 | 1000 | 133   | 0 | 0 IP  | within gene(s) PMM1595; 171nt upstream of gene PMM1594;       |
| 1524053 - | TSS_027551 | 1000 | 128   | 0 | 1 I   | within gene(s) PMM1595;                                       |
| 1525296 + | TSS_012386 | 1000 | 198   | 0 | 12 I  | within gene(s) PMM1596;                                       |
| 1528833 - | TSS_027576 | 1000 | 241   | 0 | 2 P   | 16nt upstream of gene PMM1599;                                |
| 1530109 + | TSS_012411 | 1000 | 684   | 0 | 0 Ai  | antisense to gene(s) PMM1600;                                 |
| 1530254 - | TSS_027601 | 1000 | 847   | 0 | 0 P   | 27nt upstream of gene PMM1600;                                |
| 1530378 + | TSS_012416 | 1000 | 23475 | 0 | 3 P   | 3nt upstream of gene PMM1601;                                 |
| 1533752 - | TSS_027634 | 1000 | 24554 | 0 | 8 P   | 14nt upstream of gene PMM1602;                                |
| 1533931 + | TSS_021008 | 1000 |       | 0 | 0 O   | -                                                             |
| 1533945 + | TSS_012693 | 1000 | 14    | 0 | 43 O  | -                                                             |
| 1535304 + | TSS_012844 | 1000 | 210   | 0 | 3 I   | within gene(s) PMM1605;                                       |
| 1535492 - | TSS_027654 | 1000 | 217   | 0 | 0 PAi | 224nt upstream of gene PMM1604; antisense to gene(s) PMM1605; |
| 1536359 - | TSS_027660 | 1000 | 132   | 0 | 0 I   | within gene(s) PMM1606;                                       |
| 1537533 - | TSS_027672 | 1000 | 819   | 0 | 2 I   | within gene(s) PMM1606;                                       |
| 1538095 - | TSS_027681 | 1000 | 3070  | 0 | 9 P   | 22nt upstream of gene PMM1607;                                |
| 1538185 + | TSS_012854 | 1000 | 1197  | 0 | 2 P   | 23nt upstream of gene PMM1608;                                |
| 1539568 + | TSS_012862 | 1000 | 194   | 0 | 2 IP  | within gene(s) PMM1609; 176nt upstream of gene PMM1610;       |
| 1539778 - | TSS_027692 | 1000 | 3006  | 0 | 4 Ai  | antisense to gene(s) PMM1610;                                 |
| 1543254 - | TSS_027897 | 1000 | 2750  | 0 | 3 P   | 126nt upstream of gene PMM1611;                               |
| 1543786 + | TSS_012913 | 1000 | 315   | 0 | 1 Ai  | antisense to gene(s) PMM1613;                                 |
| 1546552 - | TSS_027918 | 1000 | 851   | 0 | 1 I   | within gene(s) PMM1615;                                       |
| 1547526 + | TSS_012928 | 1000 | 277   | 0 | 0 Ai  | antisense to gene(s) PMM1618;                                 |
| 1549235 - | TSS_027936 | 1000 | 1487  | 0 | 0 I   | within gene(s) PMM1619;                                       |
| 1549500 - | TSS_027954 | 1000 | 196   | 0 | 9 I   | within gene(s) PMM1619;                                       |
| 1549798 - | TSS_027963 | 1000 | 5956  | 0 | 8 P   | 58nt upstream of gene PMM1619;                                |
| 1550719 - | TSS_027968 | 1000 | 92    | 0 | 0 I   | within gene(s) PMM1621;                                       |
| 1551244 + | TSS_012941 | 1000 | 256   | 0 | 2 Ai  | antisense to gene(s) PMM1622;                                 |
| 1551449 - | TSS_027979 | 1000 | 263   | 0 | 1 IP  | within gene(s) PMM1622; 247nt upstream of gene PMM1621;       |
| 1552273 - | TSS_028021 | 1000 | 2863  | 0 | 4 P   | 14nt upstream of gene PMM1622;                                |
| 1552380 + | TSS_012948 | 1000 | 657   | 0 | 1 P   | 12nt upstream of gene PMM1623;                                |
| 1552921 + | TSS_012968 | 1000 | 188   | 0 | 0 Ai  | antisense to gene(s) PMM1624;                                 |
| 1554498 - | TSS_028202 | 1000 | 2326  | 0 | 90 I  | within gene(s) PMM1625;                                       |
| 1554856 - | TSS_028275 | 1000 | 11928 | 0 | 4 P   | 16nt upstream of gene PMM1625;                                |
| 1554868 + | TSS_012991 | 1000 | 352   | 0 | 0 P   | 22nt upstream of gene PMM1626;                                |
| 1557432 + | TSS_013003 | 1000 | 301   | 0 | 1 Ai  | antisense to gene(s) PMM1629;                                 |
| 1557493 - | TSS_028288 | 1000 | 157   | 0 | 31 I  | within gene(s) PMM1629;                                       |
| 1558291 - | TSS_028366 | 1000 | 159   | 0 | 2 P   | 18nt upstream of gene PMM1629;                                |
| 1558456 + | TSS_013012 | 1000 | 368   | 0 | 6 Ai  | antisense to gene(s) PMM1630;                                 |
| 1559240 + | TSS_013020 | 1000 | 523   | 0 | 1 Ai  | antisense to gene(s) PMM1630;                                 |
| 1559806 - | TSS_028498 | 1000 | 4458  | 0 | 4 P   | 23nt upstream of gene PMM1630;                                |
| 1561061 - | TSS_028510 | 1000 | 16601 | 0 | 16 IP | within gene(s) PMM1634; 205nt upstream of gene PMM1633;       |
| 1562872 - | TSS_028599 | 1000 | 1194  | 0 | 1 P   | 52nt upstream of gene PMM1634;                                |
| 1563062 - | TSS_028602 | 1000 | 208   | 0 | 2 PAi | 242nt upstream of gene PMM1634; antisense to gene(s) PMM1635; |
| 1563853 + | TSS_028602 | 1000 |       | 0 | 0 P   | 71nt upstream of gene PMM1636;                                |
| 1563968 - | TSS_028605 | 1000 | 416   | 0 | 0 Ai  | antisense to gene(s) PMM1636;                                 |
| 1564062 + | TSS_013045 | 1000 | 692   | 0 | 0 I   | within gene(s) PMM1636;                                       |
| 1564123 - | TSS_028606 | 1000 | 863   | 0 | 1 Ai  | antisense to gene(s) PMM1636;                                 |
| 1566011 + | TSS_013064 | 1000 | 164   | 0 | 0 I   | within gene(s) PMM1638;                                       |
| 1566190 - | TSS_028614 | 1000 | 209   | 0 | 0 Ai  | antisense to gene(s) PMM1638;                                 |
| 1567303 - | TSS_028641 | 1000 | 116   | 0 | 3 I   | within gene(s) PMM1639;                                       |
| 1568020 - | TSS_028672 | 1000 | 157   | 0 | 27 I  | within gene(s) PMM1639;                                       |
| 1569177 - | TSS_028715 | 1000 | 201   | 0 | 0 P   | 31nt upstream of gene PMM1639;                                |
| 1570531 - | TSS_028725 | 1000 | 2237  | 0 | 0 I   | within gene(s) PMM1642;                                       |
| 1570651 - | TSS_021585 | 1000 |       | 0 | 0 P   | 14nt upstream of gene PMM1642;                                |
| 1571420 + | TSS_013086 | 1000 | 159   | 0 | 0 Ai  | antisense to gene(s) PMM1644;                                 |
| 1571635 - | TSS_028741 | 1000 | 551   | 0 | 0 P   | 26nt upstream of gene PMM1644;                                |
| 1571739 + | TSS_013087 | 1000 | 212   | 0 | 0 P   | 14nt upstream of gene PMM1645;                                |
| 1573488 - | TSS_028744 | 1000 | 93    | 0 | 0 Ai  | antisense to gene(s) PMM1645;                                 |
| 1576258 + | TSS_013100 | 1000 | 508   | 0 | 0 I   | within gene(s) PMM1648;                                       |
| 1576619 - | TSS_028756 | 1000 | 169   | 0 | 0 Ai  | antisense to gene(s) PMM1648;                                 |
| 1576861 + | TSS_013109 | 1000 | 673   | 0 | 2 I   | within gene(s) PMM1648;                                       |
| 1579478 - | TSS_028794 | 1000 |       | 0 | 0 I   | within gene(s) PMM1649;                                       |
| 1580087 - | TSS_028809 | 1000 | 323   | 0 | 3 P   | 22nt upstream of gene PMM1649;                                |
| 1580887 - | TSS_028818 | 1000 | 308   | 0 | 3 I   | within gene(s) PMM1650;                                       |
| 1582233 - | TSS_028821 | 1000 | 314   | 0 | 9 I   | within gene(s) PMM1652;                                       |

|           |            |      |      |   |       |                                                               |
|-----------|------------|------|------|---|-------|---------------------------------------------------------------|
| 1582766 - | TSS_028877 | 1000 | 360  | 0 | 6 I   | within gene(s) PMM1652;                                       |
| 1583497 - | TSS_028927 | 1000 | 449  | 0 | 4 I   | within gene(s) PMM1652;                                       |
| 1584409 - | TSS_028950 | 1000 | 3510 | 0 | 7 I   | within gene(s) PMM1653;                                       |
| 1584725 + | TSS_013150 | 1000 | 107  | 0 | 0 Ai  | antisense to gene(s) PMM1653;                                 |
| 1585023 - | TSS_028955 | 1000 | 938  | 0 | 1 IP  | within gene(s) PMM1654; 71nt upstream of gene PMM1653;        |
| 1587579 + | TSS_013159 | 1000 | 576  | 0 | 2 P   | 16nt upstream of gene PMM1656;                                |
| 1588301 + | TSS_013183 | 1000 | 809  | 0 | 4 P   | 45nt upstream of gene PMM1657;                                |
| 1589048 + | TSS_013226 | 1000 | 534  | 0 | 12 I  | within gene(s) PMM1657;                                       |
| 1594043 - | TSS_028966 | 1000 | 104  | 0 | 0 I   | within gene(s) PMM1660;                                       |
| 1594453 + | TSS_013250 | 1000 | 228  | 0 | 0 P   | 19nt upstream of gene PMM1661;                                |
| 1594701 + | TSS_013255 | 1000 | 431  | 0 | 0 I   | within gene(s) PMM1662;                                       |
| 1595654 + | TSS_013257 | 1000 | 103  | 0 | 0 I   | within gene(s) PMM1664;                                       |
| 1596577 + | TSS_013259 | 1000 | 292  | 0 | 4 P   | 32nt upstream of gene PMM1665;                                |
| 1598158 - | TSS_028977 | 1000 | 120  | 0 | 0 Ai  | antisense to gene(s) PMM1666;                                 |
| 1599097 - | TSS_028992 | 1000 | 121  | 0 | 23 I  | within gene(s) PMM1667;                                       |
| 1599261 - | TSS_029002 | 1000 | 259  | 0 | 0 P   | 34nt upstream of gene PMM1667;                                |
| 1599742 - | TSS_029006 | 1000 | 96   | 0 | 9 I   | within gene(s) PMM1668;                                       |
| 1600936 + | TSS_013306 | 1000 | 536  | 0 | 1 Ai  | antisense to gene(s) PMM1668;                                 |
| 1604240 - | TSS_029126 | 1000 | 803  | 0 | 2 IP  | within gene(s) PMM1671; 236nt upstream of gene PMM1670;       |
| 1604740 - | TSS_029129 | 1000 | 224  | 0 | 2 P   | 24nt upstream of gene PMM1671;                                |
| 1604757 + | TSS_013314 | 1000 | 284  | 0 | 8 I   | within gene(s) PMM1672;                                       |
| 1605445 + | TSS_013344 | 1000 | 260  | 0 | 4 I   | within gene(s) PMM1672;                                       |
| 1606251 + | TSS_013379 | 1000 | 208  | 0 | 2 P   | 15nt upstream of gene PMM1674;                                |
| 1606665 + | TSS_013382 | 1000 | 119  | 0 | 6 I   | within gene(s) PMM1674;                                       |
| 1607611 + | TSS_013392 | 1000 | 378  | 0 | 1 IP  | within gene(s) PMM1674; 49nt upstream of gene PMM1675;        |
| 1607789 + | TSS_013394 | 1000 | 120  | 0 | 0 I   | within gene(s) PMM1675;                                       |
| 1609627 + | TSS_013401 | 1000 | 421  | 0 | 2 P   | 4nt upstream of gene PMM1676;                                 |
| 1609831 + | TSS_013402 | 1000 | 90   | 0 | 0 I   | within gene(s) PMM1676;                                       |
| 1610827 - | TSS_029155 | 1000 | 257  | 0 | 0 O   | -                                                             |
| 1611481 + | TSS_009445 | 1000 | 3246 | 0 | 1 P   | 15nt upstream of gene PMM1678;                                |
| 1611841 + | TSS_013419 | 1000 | 262  | 0 | 16 IP | within gene(s) PMM1678; 92nt upstream of gene PMM1679;        |
| 1612758 + | TSS_013426 | 1000 | 104  | 0 | 2 I   | within gene(s) PMM1679;                                       |
| 1616290 + | TSS_013437 | 1000 | 964  | 0 | 2 Ai  | antisense to gene(s) PMM1682;                                 |
| 1616930 - | TSS_029181 | 1000 | 683  | 0 | 6 P   | 26nt upstream of gene PMM1682;                                |
| 1617422 - | TSS_029185 | 1000 | 187  | 0 | 0 P   | 93nt upstream of gene PMM1683;                                |
| 1618013 + | TSS_013447 | 1000 | 90   | 0 | 0 I   | within gene(s) PMM1684;                                       |
| 1618516 + | TSS_013451 | 1000 | 375  | 0 | 1 I   | within gene(s) PMM1685;                                       |
| 1618595 + | TSS_013453 | 1000 | 124  | 0 | 3 I   | within gene(s) PMM1685;                                       |
| 1619698 - | TSS_029189 | 1000 | 218  | 0 | 0 Ai  | antisense to gene(s) PMM1686;                                 |
| 1619840 - | TSS_029190 | 1000 | 181  | 0 | 0 Ai  | antisense to gene(s) PMM1686;                                 |
| 1620131 + | TSS_013460 | 1000 | 833  | 0 | 4 P   | 24nt upstream of gene PMM1687;                                |
| 1621782 + | TSS_013470 | 1000 | 109  | 0 | 1 I   | within gene(s) PMM1688;                                       |
| 1622476 - | TSS_029195 | 1000 | 1441 | 0 | 6 Ai  | antisense to gene(s) PMM1688;                                 |
| 1623293 + | TSS_013483 | 1000 | 366  | 0 | 3 I   | within gene(s) PMM1689;                                       |
| 1624911 - | TSS_029207 | 1000 | 201  | 0 | 0 Ai  | antisense to gene(s) PMM1690;                                 |
| 1625074 - | TSS_029208 | 1000 | 184  | 0 | 0 Ai  | antisense to gene(s) PMM1690;                                 |
| 1628185 - | TSS_029211 | 1000 | 261  | 0 | 4 Ai  | antisense to gene(s) PMM1693;                                 |
| 1628843 - | TSS_029215 | 1000 | 186  | 0 | 1 I   | within gene(s) PMM1694;                                       |
| 1628980 + | TSS_013557 | 1000 | 523  | 0 | 2 PAi | 173nt upstream of gene PMM1695; antisense to gene(s) PMM1694; |
| 1629107 - | TSS_029218 | 1000 | 347  | 0 | 0 P   | 0nt upstream of gene PMM1694;                                 |
| 1630728 + | TSS_013566 | 1000 | 128  | 0 | 1 I   | within gene(s) PMM1696;                                       |
| 1632609 + | TSS_013569 | 1000 | 165  | 0 | 0 P   | 98nt upstream of gene PMM1697;                                |
| 1632679 + | TSS_013570 | 1000 | 122  | 0 | 0 P   | 28nt upstream of gene PMM1697;                                |
| 1633014 + | TSS_013585 | 1000 | 267  | 0 | 12 I  | within gene(s) PMM1697;                                       |
| 1634577 + | TSS_013652 | 1000 | 220  | 0 | 0 Ai  | antisense to gene(s) PMM1699;                                 |
| 1634772 + | TSS_013653 | 1000 | 362  | 0 | 0 Ai  | antisense to gene(s) PMM1699;                                 |
| 1635344 + | TSS_013654 | 1000 | 140  | 0 | 2 PAi | 199nt upstream of gene PMM1700; antisense to gene(s) PMM1699; |
| 1635526 + | TSS_009555 | 1000 | 5321 | 0 | 5 P   | 17nt upstream of gene PMM1700;                                |
| 1636527 + | TSS_013754 | 1000 | 178  | 0 | 15 I  | within gene(s) PMM1700;                                       |
| 1638726 - | TSS_029256 | 1000 | 107  | 0 | 0 Ai  | antisense to gene(s) PMM1701;                                 |
| 1638821 - | TSS_029257 | 1000 | 116  | 0 | 5 Ai  | antisense to gene(s) PMM1701;                                 |
| 1639548 + | TSS_013884 | 1000 | 137  | 0 | 0 Ai  | antisense to gene(s) PMM1702;                                 |
| 1640380 - | TSS_029263 | 1000 | 208  | 0 | 0 P   | 32nt upstream of gene PMM1702;                                |
| 1640445 + | TSS_013886 | 1000 | 2205 | 0 | 2 I   | within gene(s) PMM1703;                                       |
| 1642050 + | TSS_013891 | 1000 | 1029 | 0 | 1 Ai  | antisense to gene(s) PMM1704;                                 |
| 1643399 - | TSS_029430 | 1000 | 774  | 0 | 7 P   | 19nt upstream of gene PMM1704;                                |
| 1644415 + | TSS_013907 | 1000 | 102  | 0 | 0 P   | 50nt upstream of gene PMM1706;                                |
| 1645357 - | TSS_029444 | 1000 | 271  | 0 | 10 I  | within gene(s) PMM1707;                                       |
| 1646216 - | TSS_029475 | 1000 | 1910 | 0 | 0 P   | 69nt upstream of gene PMM1707;                                |
| 1646419 + | TSS_013924 | 1000 | 1676 | 0 | 2 P   | 20nt upstream of gene PMM1708;                                |
| 1647512 - | TSS_029480 | 1000 | 149  | 0 | 1 Ai  | antisense to gene(s) PMM1709;                                 |
| 1648218 + | TSS_013942 | 1000 | 100  | 0 | 3 Ai  | antisense to gene(s) PMM1711;                                 |
| 1649316 - | TSS_029485 | 1000 | 152  | 0 | 0 I   | within gene(s) PMM1711;                                       |
| 1654524 + | TSS_013965 | 1000 | 183  | 0 | 4 I   | within gene(s) PMM1714;                                       |
| 1656926 + | TSS_013976 | 1000 | 204  | 0 | 6 I   | within gene(s) PMM1716;                                       |

\*\*Class represents the classification of the start site. I represents internal start sites, Ai represents antisense start sites, P represents primary start sites, IP represents internal or primary start sites, PAi represents primary or Antisense start sites, Ad represents Antisense or downstream IAd represents internal Antisense or downstream and O represents orphan.
