# Supplementary material for: Nitrogen cost minimization is promoted by structural changes in the transcriptome of N-deprived Prochlorococcus cells
Source: PubMed Central journal article supplement (PMC5607370; doi:10.1038/ismej.2017.88), 2017-06-06
Supplement: ismej201788x19.pdf [file ismej201788x19.pdf]

Table S12. Internal Start Site Comparison of This Study to Voigt et al. (2014). Internal TSSs identified by TSSAR were directly compared to Voigt et al. to determine presence or absence in their study. Genes in bold did not have an internal TSS in their study.

| Identity       | Internal TSS Identified by Voigt |
|----------------|----------------------------------|
| PMM0003        | Yes                              |
| PMM0004        | Yes                              |
| <b>PMM0007</b> | <b>No</b>                        |
| PMM0010        | Yes                              |
| <b>PMM0012</b> | <b>No</b>                        |
| PMM0022        | Yes                              |
| PMM0024        | Yes                              |
| PMM0025        | Yes                              |
| PMM0026        | Yes                              |
| <b>PMM0027</b> | <b>No</b>                        |
| <b>PMM0030</b> | <b>No</b>                        |
| PMM0032        | Yes                              |
| <b>PMM0034</b> | <b>No</b>                        |
| <b>PMM0035</b> | <b>No</b>                        |
| PMM0036        | Yes                              |
| PMM0037        | Yes                              |
| PMM0038        | Yes                              |
| <b>PMM0042</b> | <b>No</b>                        |
| PMM0044        | Yes                              |
| <b>PMM0045</b> | <b>No</b>                        |
| <b>PMM0047</b> | <b>No</b>                        |
| <b>PMM0051</b> | <b>No</b>                        |
| <b>PMM0055</b> | <b>No</b>                        |
| <b>PMM0058</b> | <b>No</b>                        |
| PMM0060        | Yes                              |
| <b>PMM0063</b> | <b>No</b>                        |
| PMM0065        | Yes                              |
| <b>PMM0073</b> | <b>No</b>                        |
| <b>PMM0075</b> | <b>No</b>                        |
| <b>PMM0077</b> | <b>No</b>                        |
| <b>PMM0081</b> | <b>No</b>                        |
| PMM0083        | Yes                              |
| PMM0084        | Yes                              |
| <b>PMM0085</b> | <b>No</b>                        |
| <b>PMM0086</b> | <b>No</b>                        |
| <b>PMM0087</b> | <b>No</b>                        |
| PMM0089        | Yes                              |
| <b>PMM0091</b> | <b>No</b>                        |
| PMM0095        | Yes                              |
| <b>PMM0099</b> | <b>No</b>                        |
| PMM0100        | Yes                              |
| PMM0101        | Yes                              |
| <b>PMM0103</b> | <b>No</b>                        |
| <b>PMM0117</b> | <b>No</b>                        |
| PMM0121        | Yes                              |
| <b>PMM0123</b> | <b>No</b>                        |
| <b>PMM0126</b> | <b>No</b>                        |
| <b>PMM0128</b> | <b>No</b>                        |
| <b>PMM0129</b> | <b>No</b>                        |
| <b>PMM0131</b> | <b>No</b>                        |
| PMM0133        | Yes                              |
| <b>PMM0134</b> | <b>No</b>                        |
| <b>PMM0135</b> | <b>No</b>                        |
| PMM0138        | Yes                              |
| <b>PMM0143</b> | <b>No</b>                        |
| <b>PMM0144</b> | <b>No</b>                        |
| <b>PMM0147</b> | <b>No</b>                        |
| <b>PMM0148</b> | <b>No</b>                        |
| <b>PMM0149</b> | <b>No</b>                        |
| <b>PMM0150</b> | <b>No</b>                        |
| <b>PMM0152</b> | <b>No</b>                        |
| <b>PMM0153</b> | <b>No</b>                        |
| PMM0156        | Yes                              |
| <b>PMM0159</b> | <b>No</b>                        |
| <b>PMM0160</b> | <b>No</b>                        |
| PMM0163        | Yes                              |
| <b>PMM0164</b> | <b>No</b>                        |
| <b>PMM0169</b> | <b>No</b>                        |
| PMM0170        | Yes                              |
| <b>PMM0172</b> | <b>No</b>                        |
| <b>PMM0185</b> | <b>No</b>                        |
| PMM0187        | Yes                              |
| <b>PMM0191</b> | <b>No</b>                        |
| PMM0192        | Yes                              |
| PMM0195        | Yes                              |
| <b>PMM0201</b> | <b>No</b>                        |
| <b>PMM0202</b> | <b>No</b>                        |
| <b>PMM0203</b> | <b>No</b>                        |
| <b>PMM0205</b> | <b>No</b>                        |
| PMM0207        | Yes                              |
| PMM0209        | Yes                              |
| PMM0211        | Yes                              |
| PMM0214        | Yes                              |
| PMM0217        | Yes                              |
| <b>PMM0222</b> | <b>No</b>                        |
| <b>PMM0223</b> | <b>No</b>                        |
| <b>PMM0224</b> | <b>No</b>                        |
| PMM0226        | Yes                              |
| PMM0227        | Yes                              |
| <b>PMM0228</b> | <b>No</b>                        |
| <b>PMM0233</b> | <b>No</b>                        |
| <b>PMM0235</b> | <b>No</b>                        |
| <b>PMM0238</b> | <b>No</b>                        |
| <b>PMM0244</b> | <b>No</b>                        |
| PMM0256        | Yes                              |
| <b>PMM0258</b> | <b>No</b>                        |
| PMM0263        | Yes                              |
| <b>PMM0264</b> | <b>No</b>                        |
| <b>PMM0265</b> | <b>No</b>                        |
| <b>PMM0268</b> | <b>No</b>                        |
| PMM0276        | Yes                              |
| PMM0279        | Yes                              |
| PMM0284        | Yes                              |
| PMM0285        | Yes                              |
| <b>PMM0293</b> | <b>No</b>                        |
| PMM0296        | Yes                              |
| PMM0304        | Yes                              |

|                |           |
|----------------|-----------|
| PMM0312        | No        |
| PMM0315        | No        |
| PMM0320        | Yes       |
| <b>PMM0321</b> | <b>No</b> |
| PMM0324        | Yes       |
| <b>PMM0325</b> | <b>No</b> |
| <b>PMM0326</b> | <b>No</b> |
| PMM0333        | Yes       |
| <b>PMM0335</b> | <b>No</b> |
| PMM0339        | Yes       |
| <b>PMM0346</b> | <b>No</b> |
| <b>PMM0356</b> | <b>No</b> |
| PMM0358        | Yes       |
| <b>PMM0366</b> | <b>No</b> |
| <b>PMM0368</b> | <b>No</b> |
| <b>PMM0370</b> | <b>No</b> |
| PMM0386        | Yes       |
| <b>PMM0390</b> | <b>No</b> |
| <b>PMM0397</b> | <b>No</b> |
| PMM0398        | Yes       |
| <b>PMM0405</b> | <b>No</b> |
| <b>PMM0406</b> | <b>No</b> |
| <b>PMM0407</b> | <b>No</b> |
| <b>PMM0420</b> | <b>No</b> |
| PMM0425        | Yes       |
| <b>PMM0426</b> | <b>No</b> |
| PMM0430        | Yes       |
| PMM0434        | Yes       |
| PMM0438        | Yes       |
| <b>PMM0445</b> | <b>No</b> |
| <b>PMM0446</b> | <b>No</b> |
| <b>PMM0448</b> | <b>No</b> |
| PMM0451        | Yes       |
| PMM0452        | Yes       |
| PMM0454        | Yes       |
| <b>PMM0461</b> | <b>No</b> |
| <b>PMM0462</b> | <b>No</b> |
| <b>PMM0472</b> | <b>No</b> |
| <b>PMM0473</b> | <b>No</b> |
| <b>PMM0477</b> | <b>No</b> |
| <b>PMM0482</b> | <b>No</b> |
| <b>PMM0483</b> | <b>No</b> |
| PMM0493        | Yes       |
| PMM0494        | Yes       |
| PMM0495        | Yes       |
| PMM0500        | Yes       |
| PMM0503        | Yes       |
| <b>PMM0513</b> | <b>No</b> |
| PMM0516        | Yes       |
| <b>PMM0518</b> | <b>No</b> |
| <b>PMM0519</b> | <b>No</b> |
| PMM0520        | Yes       |
| <b>PMM0521</b> | <b>No</b> |
| <b>PMM0522</b> | <b>No</b> |
| PMM0525        | Yes       |
| PMM0526        | Yes       |
| PMM0533        | Yes       |
| <b>PMM0534</b> | <b>No</b> |
| <b>PMM0537</b> | <b>No</b> |
| PMM0544        | Yes       |
| PMM0545        | Yes       |
| PMM0546        | Yes       |
| <b>PMM0550</b> | <b>No</b> |
| PMM0552        | Yes       |
| PMM0560        | Yes       |
| PMM0561        | Yes       |
| <b>PMM0565</b> | <b>No</b> |
| <b>PMM0577</b> | <b>No</b> |
| PMM0580        | Yes       |
| PMM0582        | Yes       |
| PMM0585        | Yes       |
| <b>PMM0590</b> | <b>No</b> |
| PMM0593        | Yes       |
| <b>PMM0594</b> | <b>No</b> |
| PMM0596        | Yes       |
| PMM0601        | Yes       |
| PMM0602        | Yes       |
| <b>PMM0604</b> | <b>No</b> |
| <b>PMM0608</b> | <b>No</b> |
| PMM0609        | Yes       |
| <b>PMM0611</b> | <b>No</b> |
| PMM0613        | Yes       |
| PMM0615        | Yes       |
| <b>PMM0618</b> | <b>No</b> |
| <b>PMM0619</b> | <b>No</b> |
| <b>PMM0622</b> | <b>No</b> |
| PMM0623        | Yes       |
| PMM0633        | Yes       |
| PMM0640        | Yes       |
| <b>PMM0642</b> | <b>No</b> |
| <b>PMM0644</b> | <b>No</b> |
| PMM0658        | Yes       |
| <b>PMM0659</b> | <b>No</b> |
| <b>PMM0660</b> | <b>No</b> |
| <b>PMM0661</b> | <b>No</b> |
| <b>PMM0676</b> | <b>No</b> |
| PMM0681        | Yes       |
| <b>PMM0683</b> | <b>No</b> |
| PMM0684        | Yes       |
| PMM0687        | Yes       |
| PMM0693        | Yes       |
| <b>PMM0694</b> | <b>No</b> |
| <b>PMM0698</b> | <b>No</b> |
| PMM0704        | Yes       |
| <b>PMM0707</b> | <b>No</b> |
| PMM0708        | Yes       |
| <b>PMM0709</b> | <b>No</b> |
| <b>PMM0710</b> | <b>No</b> |
| <b>PMM0725</b> | <b>No</b> |

|                |           |
|----------------|-----------|
| PMM0742        | Yes       |
| <b>PMM0743</b> | <b>No</b> |
| <b>PMM0749</b> | <b>No</b> |
| PMM0750        | Yes       |
| <b>PMM0753</b> | <b>No</b> |
| PMM0754        | Yes       |
| PMM0756        | Yes       |
| PMM0757        | Yes       |
| <b>PMM0758</b> | <b>No</b> |
| <b>PMM0760</b> | <b>No</b> |
| <b>PMM0766</b> | <b>No</b> |
| <b>PMM0767</b> | <b>No</b> |
| <b>PMM0770</b> | <b>No</b> |
| <b>PMM0774</b> | <b>No</b> |
| <b>PMM0780</b> | <b>No</b> |
| <b>PMM0784</b> | <b>No</b> |
| <b>PMM0785</b> | <b>No</b> |
| PMM0787        | Yes       |
| PMM0796        | Yes       |
| <b>PMM0804</b> | <b>No</b> |
| <b>PMM0815</b> | <b>No</b> |
| <b>PMM0819</b> | <b>No</b> |
| PMM0821        | Yes       |
| PMM0825        | Yes       |
| <b>PMM0829</b> | <b>No</b> |
| <b>PMM0831</b> | <b>No</b> |
| PMM0832        | Yes       |
| <b>PMM0842</b> | <b>No</b> |
| <b>PMM0844</b> | <b>No</b> |
| <b>PMM0853</b> | <b>No</b> |
| <b>PMM0858</b> | <b>No</b> |
| <b>PMM0863</b> | <b>No</b> |
| PMM0872        | Yes       |
| PMM0877        | Yes       |
| PMM0880        | Yes       |
| PMM0881        | Yes       |
| PMM0893        | Yes       |
| PMM0894        | Yes       |
| <b>PMM0896</b> | <b>No</b> |
| <b>PMM0897</b> | <b>No</b> |
| PMM0899        | Yes       |
| PMM0901        | Yes       |
| <b>PMM0906</b> | <b>No</b> |
| <b>PMM0907</b> | <b>No</b> |
| <b>PMM0908</b> | <b>No</b> |
| <b>PMM0912</b> | <b>No</b> |
| <b>PMM0913</b> | <b>No</b> |
| PMM0916        | Yes       |
| <b>PMM0941</b> | <b>No</b> |
| PMM0945        | Yes       |
| PMM0946        | Yes       |
| PMM0954        | Yes       |
| <b>PMM0955</b> | <b>No</b> |
| <b>PMM0961</b> | <b>No</b> |
| <b>PMM0965</b> | <b>No</b> |
| PMM0966        | Yes       |
| <b>PMM0970</b> | <b>No</b> |
| <b>PMM0974</b> | <b>No</b> |
| <b>PMM0975</b> | <b>No</b> |
| <b>PMM1009</b> | <b>No</b> |
| <b>PMM1022</b> | <b>No</b> |
| PMM1033        | Yes       |
| <b>PMM1033</b> | <b>No</b> |
| PMM1038        | Yes       |
| PMM1039        | Yes       |
| <b>PMM1040</b> | <b>No</b> |
| <b>PMM1041</b> | <b>No</b> |
| PMM1042        | Yes       |
| PMM1055        | Yes       |
| <b>PMM1057</b> | <b>No</b> |
| PMM1062        | Yes       |
| PMM1064        | Yes       |
| PMM1066        | Yes       |
| PMM1067        | Yes       |
| PMM1075        | Yes       |
| PMM1077        | Yes       |
| PMM1080        | Yes       |
| <b>PMM1081</b> | <b>No</b> |
| <b>PMM1088</b> | <b>No</b> |
| PMM1090        | Yes       |
| <b>PMM1091</b> | <b>No</b> |
| PMM1092        | Yes       |
| <b>PMM1093</b> | <b>No</b> |
| PMM1096        | Yes       |
| <b>PMM1113</b> | <b>No</b> |
| PMM1119        | Yes       |
| PMM1121        | Yes       |
| <b>PMM1123</b> | <b>No</b> |
| PMM1124        | Yes       |
| <b>PMM1127</b> | <b>No</b> |
| <b>PMM1132</b> | <b>No</b> |
| <b>PMM1139</b> | <b>No</b> |
| <b>PMM1140</b> | <b>No</b> |
| <b>PMM1142</b> | <b>No</b> |
| PMM1145        | Yes       |
| <b>PMM1157</b> | <b>No</b> |
| <b>PMM1158</b> | <b>No</b> |
| PMM1174        | Yes       |
| PMM1176        | Yes       |
| <b>PMM1178</b> | <b>No</b> |
| <b>PMM1186</b> | <b>No</b> |
| PMM1188        | Yes       |
| <b>PMM1191</b> | <b>No</b> |
| PMM1192        | Yes       |
| <b>PMM1196</b> | <b>No</b> |
| PMM1199        | Yes       |
| <b>PMM1202</b> | <b>No</b> |
| <b>PMM1204</b> | <b>No</b> |
| <b>PMM1205</b> | <b>No</b> |

|                |           |
|----------------|-----------|
| <b>PMM1225</b> | <b>No</b> |
| <b>PMM1232</b> | <b>No</b> |
| PMM1234        | Yes       |
| PMM1235        | Yes       |
| PMM1249        | Yes       |
| PMM1250        | Yes       |
| PMM1256        | Yes       |
| PMM1258        | Yes       |
| <b>PMM1259</b> | <b>No</b> |
| PMM1260        | Yes       |
| PMM1261        | Yes       |
| <b>PMM1264</b> | <b>No</b> |
| <b>PMM1269</b> | <b>No</b> |
| <b>PMM1270</b> | <b>No</b> |
| <b>PMM1280</b> | <b>No</b> |
| PMM1287        | Yes       |
| <b>PMM1288</b> | <b>No</b> |
| PMM1289        | Yes       |
| PMM1290        | Yes       |
| <b>PMM1293</b> | <b>No</b> |
| PMM1299        | Yes       |
| <b>PMM1300</b> | <b>No</b> |
| PMM1301        | Yes       |
| PMM1306        | Yes       |
| PMM1310        | Yes       |
| PMM1311        | Yes       |
| PMM1312        | Yes       |
| PMM1318        | Yes       |
| <b>PMM1322</b> | <b>No</b> |
| PMM1323        | Yes       |
| <b>PMM1324</b> | <b>No</b> |
| <b>PMM1332</b> | <b>No</b> |
| PMM1333        | Yes       |
| <b>PMM1335</b> | <b>No</b> |
| <b>PMM1338</b> | <b>No</b> |
| PMM1339        | Yes       |
| PMM1340        | Yes       |
| PMM1341        | Yes       |
| <b>PMM1342</b> | <b>No</b> |
| PMM1349        | Yes       |
| <b>PMM1350</b> | <b>No</b> |
| <b>PMM1360</b> | <b>No</b> |
| <b>PMM1383</b> | <b>No</b> |
| PMM1394        | Yes       |
| <b>PMM1396</b> | <b>No</b> |
| PMM1400        | Yes       |
| PMM1415        | Yes       |
| PMM1416        | Yes       |
| <b>PMM1422</b> | <b>No</b> |
| <b>PMM1428</b> | <b>No</b> |
| PMM1432        | Yes       |
| <b>PMM1434</b> | <b>No</b> |
| <b>PMM1435</b> | <b>No</b> |
| <b>PMM1436</b> | <b>No</b> |
| <b>PMM1443</b> | <b>No</b> |
| PMM1449        | Yes       |
| PMM1458        | Yes       |
| <b>PMM1465</b> | <b>No</b> |
| PMM1467        | Yes       |
| <b>PMM1476</b> | <b>No</b> |
| <b>PMM1483</b> | <b>No</b> |
| PMM1484        | Yes       |
| PMM1485        | Yes       |
| PMM1492        | Yes       |
| PMM1494        | Yes       |
| PMM1496        | Yes       |
| PMM1499        | Yes       |
| PMM1500        | Yes       |
| PMM1501        | Yes       |
| PMM1508        | Yes       |
| PMM1509        | Yes       |
| <b>PMM1512</b> | <b>No</b> |
| <b>PMM1519</b> | <b>No</b> |
| <b>PMM1523</b> | <b>No</b> |
| <b>PMM1524</b> | <b>No</b> |
| PMM1526        | Yes       |
| PMM1527        | Yes       |
| PMM1533        | Yes       |
| <b>PMM1535</b> | <b>No</b> |
| <b>PMM1536</b> | <b>No</b> |
| PMM1540        | Yes       |
| <b>PMM1542</b> | <b>No</b> |
| <b>PMM1555</b> | <b>No</b> |
| PMM1562        | Yes       |
| <b>PMM1566</b> | <b>No</b> |
| <b>PMM1570</b> | <b>No</b> |
| <b>PMM1574</b> | <b>No</b> |
| <b>PMM1575</b> | <b>No</b> |
| PMM1577        | Yes       |
| PMM1580        | Yes       |
| PMM1583        | Yes       |
| PMM1585        | Yes       |
| PMM1589        | Yes       |
| <b>PMM1594</b> | <b>No</b> |
| <b>PMM1595</b> | <b>No</b> |
| PMM1596        | Yes       |
| <b>PMM1600</b> | <b>No</b> |
| PMM1605        | Yes       |
| <b>PMM1606</b> | <b>No</b> |
| PMM1609        | Yes       |
| <b>PMM1615</b> | <b>No</b> |
| <b>PMM1619</b> | <b>No</b> |
| PMM1621        | Yes       |
| <b>PMM1625</b> | <b>No</b> |
| <b>PMM1629</b> | <b>No</b> |
| <b>PMM1630</b> | <b>No</b> |
| <b>PMM1636</b> | <b>No</b> |
| <b>PMM1638</b> | <b>No</b> |
| PMM1639        | Yes       |

|                |           |
|----------------|-----------|
| PMM1640        | Yes       |
| PMM1642        | Yes       |
| <b>PMM1648</b> | <b>No</b> |
| PMM1650        | Yes       |
| PMM1652        | Yes       |
| PMM1653        | Yes       |
| <b>PMM1657</b> | <b>No</b> |
| PMM1660        | Yes       |
| <b>PMM1662</b> | <b>No</b> |
| PMM1664        | Yes       |
| <b>PMM1665</b> | <b>No</b> |
| <b>PMM1667</b> | <b>No</b> |
| PMM1668        | Yes       |
| PMM1669        | Yes       |
| PMM1672        | Yes       |
| <b>PMM1674</b> | <b>No</b> |
| PMM1675        | Yes       |
| PMM1676        | Yes       |
| <b>PMM1679</b> | <b>No</b> |
| PMM1684        | Yes       |
| PMM1685        | Yes       |
| PMM1688        | Yes       |
| <b>PMM1689</b> | <b>No</b> |
| <b>PMM1694</b> | <b>No</b> |
| PMM1695        | Yes       |
| PMM1696        | Yes       |
| PMM1697        | Yes       |
| PMM1700        | Yes       |
| PMM1702        | Yes       |
| PMM1703        | Yes       |
| <b>PMM1704</b> | <b>No</b> |
| <b>PMM1706</b> | <b>No</b> |
| <b>PMM1707</b> | <b>No</b> |
| <b>PMM1711</b> | <b>No</b> |
| PMM1712        | Yes       |
| <b>PMM1714</b> | <b>No</b> |
| <b>PMM1716</b> | <b>No</b> |
