# Supplementary material for: Nitrogen cost minimization is promoted by structural changes in the transcriptome of N-deprived Prochlorococcus cells
Source: PubMed Central journal article supplement (PMC5607370; doi:10.1038/ismej.2017.88), 2017-06-06
Supplement: ismej201788x20.pdf [file ismej201788x20.pdf]

Table S13. Ratio of internal to primary start site utilization based on read mappings and TSSAR. All results are for TSSAR identified internal start sites with a p value of 0. ID column matches to results found in Tables S8-S9

| Position | Strand | ID         | Identity | Primary Position | Ratio of Internal To Primary Reads | Type    |
|----------|--------|------------|----------|------------------|------------------------------------|---------|
| 1291478  | +      | TSS_007213 | PMM1340  | 1290486          | 12.93                              | Control |
| 730435   | +      | TSS_004333 | PMM0767  | 730331           | 11.79                              | Control |
| 1068999  | -      | TSS_016277 | PMM1121  | 1069447          | 6.82                               | Control |
| 1380019  | +      | TSS_007743 | PMM1443  | 1379949          | 5.57                               | Control |
| 1448025  | -      | TSS_019253 | PMM1509  | 1449812          | 5.51                               | Control |
| 860406   | -      | TSS_015192 | PMM0897  | 860982           | 4.84                               | Control |
| 32374    | +      | TSS_000209 | PMM0034  | 32317            | 4.35                               | Control |
| 387042   | -      | TSS_012107 | PMM0407  | 387181           | 3.93                               | Control |
| 140081   | -      | TSS_010302 | PMM0143  | 140446           | 3.64                               | Control |
| 324964   | +      | TSS_002154 | PMM0335  | 324585           | 3.59                               | Control |
| 1633040  | +      | TSS_009535 | PMM1697  | 1632609          | 3.48                               | Control |
| 1219165  | -      | TSS_016932 | PMM1264  | 1219801          | 3.09                               | Control |
| 98015    | -      | TSS_010136 | PMM0095  | 98676            | 2.87                               | Control |
| 763063   | +      | TSS_004496 | PMM0804  | 762992           | 2.49                               | Control |
| 590072   | +      | TSS_003690 | PMM0619  | 589671           | 2.47                               | Control |
| 467553   | +      | TSS_002893 | PMM0494  | 467409           | 2.25                               | Control |
| 468497   | -      | TSS_012700 | PMM0495  | 469000           | 2.13                               | Control |
| 1218465  | -      | TSS_016879 | PMM1264  | 1219801          | 1.96                               | Control |
| 258478   | -      | TSS_011103 | PMM0268  | 258613           | 1.89                               | Control |
| 223706   | -      | TSS_010918 | PMM0228  | 223847           | 1.85                               | Control |
| 582602   | -      | TSS_013632 | PMM0611  | 582767           | 1.80                               | Control |
| 1024480  | +      | TSS_005505 | PMM1081  | 1023698          | 1.71                               | Control |
| 1568018  | -      | TSS_021542 | PMM1639  | 1569177          | 1.68                               | Control |
| 154964   | -      | TSS_010404 | PMM0159  | 155061           | 1.65                               | Control |
| 467736   | +      | TSS_002903 | PMM0494  | 467409           | 1.48                               | Control |
| 466192   | +      | TSS_002884 | PMM0493  | 465840           | 1.47                               | Control |
| 558490   | +      | TSS_003542 | PMM0590  | 558189           | 1.38                               | Control |
| 328681   | -      | TSS_011822 | PMM0339  | 329348           | 1.35                               | Control |
| 1000995  | -      | TSS_015707 | PMM1062  | 1002034          | 1.33                               | Control |
| 1557486  | -      | TSS_021342 | PMM1629  | 1558291          | 1.31                               | Control |
| 1363264  | -      | TSS_017821 | PMM1422  | 1363417          | 1.24                               | Control |
| 121450   | -      | TSS_010237 | PMM0123  | 121764           | 1.21                               | Control |
| 123779   | +      | TSS_000612 | PMM0126  | 123251           | 1.18                               | Control |
| 1001916  | -      | TSS_015710 | PMM1062  | 1002034          | 1.15                               | Control |
| 1252148  | +      | TSS_006906 | PMM1300  | 1251088          | 1.15                               | Control |
| 150290   | +      | TSS_000819 | PMM0152  | 149427           | 1.10                               | Control |
| 1454543  | +      | TSS_008337 | PMM1512  | 1450891          | 1.08                               | Control |
| 66518    | +      | TSS_000351 | PMM0060  | 65752            | 1.04                               | Control |
| 1469172  | +      | TSS_008462 | PMM1526  | 1468704          | 1.00                               | Control |
| 730737   | +      | TSS_004340 | PMM0767  | 730331           | 0.92                               | Control |
| 223299   | -      | TSS_010889 | PMM0228  | 223847           | 0.92                               | Control |
| 1525299  | +      | TSS_008863 | PMM1596  | 1524215          | 0.85                               | Control |
| 900053   | +      | TSS_005025 | PMM0941  | 899977           | 0.85                               | Control |
| 1245796  | +      | TSS_006866 | PMM1293  | 1245509          | 0.84                               | Control |
| 1469928  | -      | TSS_019961 | PMM1527  | 1470923          | 0.84                               | Control |
| 66151    | +      | TSS_000349 | PMM0060  | 65752            | 0.81                               | Control |
| 151351   | -      | TSS_010369 | PMM0153  | 151546           | 0.78                               | Control |
| 151109   | -      | TSS_010365 | PMM0153  | 151546           | 0.78                               | Control |
| 614082   | -      | TSS_013745 | PMM0644  | 614781           | 0.76                               | Control |
| 704459   | -      | TSS_014101 | PMM0743  | 705815           | 0.75                               | Control |
| 143488   | -      | TSS_010323 | PMM0147  | 143883           | 0.71                               | Control |
| 1454166  | +      | TSS_008330 | PMM1512  | 1450891          | 0.71                               | Control |
| 1036076  | +      | TSS_005570 | PMM1090  | 1035252          | 0.68                               | Control |
| 1019222  | -      | TSS_015819 | PMM1075  | 1019352          | 0.66                               | Control |
| 1454745  | +      | TSS_008339 | PMM1512  | 1450891          | 0.65                               | Control |
| 1567306  | -      | TSS_021525 | PMM1639  | 1569177          | 0.64                               | Control |
| 105437   | -      | TSS_010164 | PMM0101  | 105946           | 0.63                               | Control |
| 78158    | -      | TSS_010048 | PMM0073  | 79154            | 0.62                               | Control |
| 1018655  | -      | TSS_015770 | PMM1075  | 1019352          | 0.62                               | Control |
| 730925   | +      | TSS_004346 | PMM0767  | 730331           | 0.61                               | Control |
| 223578   | -      | TSS_010913 | PMM0228  | 223847           | 0.60                               | Control |
| 628505   | -      | TSS_013812 | PMM0660  | 628656           | 0.60                               | Control |
| 499089   | +      | TSS_003081 | PMM0526  | 497550           | 0.60                               | Control |
| 1300005  | +      | TSS_007266 | PMM1349  | 1299756          | 0.59                               | Control |
| 784835   | +      | TSS_004587 | PMM0829  | 784601           | 0.56                               | Control |
| 1332932  | -      | TSS_017653 | PMM1383  | 1333562          | 0.56                               | Control |
| 309678   | -      | TSS_011589 | PMM0324  | 309757           | 0.55                               | Control |
| 348397   | +      | TSS_002235 | PMM0366  | 348206           | 0.54                               | Control |
| 1499500  | -      | TSS_020778 | PMM1570  | 1499641          | 0.54                               | Control |
| 1059858  | +      | TSS_005663 | PMM1113  | 1059299          | 0.52                               | Control |
| 746288   | -      | TSS_014510 | PMM0784  | 746584           | 0.51                               | Control |
| 66815    | +      | TSS_000353 | PMM0060  | 65752            | 0.51                               | Control |
| 12361    | +      | TSS_000061 | PMM0010  | 11776            | 0.50                               | Control |
| 433897   | +      | TSS_002683 | PMM0454  | 433437           | 0.47                               | Control |
| 63461    | +      | TSS_000341 | PMM0058  | 63116            | 0.46                               | Control |
| 1639698  | -      | TSS_021915 | PMM1702  | 1640380          | 0.45                               | Control |
| 1490650  | +      | TSS_008712 | PMM1562  | 1490373          | 0.44                               | Control |
| 189007   | +      | TSS_000955 | PMM0195  | 188865           | 0.44                               | Control |
| 1252018  | +      | TSS_006904 | PMM1300  | 1251088          | 0.43                               | Control |
| 1589048  | -      | TSS_009308 | PMM1657  | 1588301          | 0.42                               | Control |
| 1554498  | -      | TSS_021285 | PMM1625  | 1554856          | 0.41                               | Control |
| 723763   | -      | TSS_014249 | PMM0760  | 724578           | 0.40                               | Control |
| 1245700  | +      | TSS_006865 | PMM1293  | 1245509          | 0.40                               | Control |
| 614001   | -      | TSS_013743 | PMM0644  | 614781           | 0.40                               | Control |
| 1518815  | -      | TSS_020898 | PMM1589  | 1519244          | 0.39                               | Control |
| 78218    | -      | TSS_010050 | PMM0073  | 79154            | 0.39                               | Control |
| 705461   | -      | TSS_014138 | PMM0743  | 705815           | 0.39                               | Control |
| 15347    | +      | TSS_000080 | PMM0012  | 14568            | 0.39                               | Control |
| 1597137  | +      | TSS_009358 | PMM1665  | 1596577          | 0.38                               | Control |
| 504905   | +      | TSS_003122 | PMM0533  | 504428           | 0.38                               | Control |
| 27367    | +      | TSS_000180 | PMM0026  | 27273            | 0.37                               | Control |

|           |                    |         |              |
|-----------|--------------------|---------|--------------|
| 644591 +  | TSS_003974 PMM0676 | 643669  | 0.37 Control |
| 197771 -  | TSS_010596 PMM0205 | 198069  | 0.37 Control |
| 197876 -  | TSS_010601 PMM0205 | 198069  | 0.36 Control |
| 129278 -  | TSS_010273 PMM0131 | 130071  | 0.33 Control |
| 1623293 + | TSS_009503 PMM1689 | 1623168 | 0.32 Control |
| 729981 -  | TSS_014324 PMM0766 | 730261  | 0.31 Control |
| 78481 -   | TSS_010056 PMM0073 | 79154   | 0.31 Control |
| 493996 -  | TSS_012831 PMM0522 | 494177  | 0.31 Control |
| 1224306 - | TSS_017006 PMM1270 | 1225100 | 0.29 Control |
| 105798 -  | TSS_010171 PMM0101 | 105946  | 0.28 Control |
| 1095730 + | TSS_005822 PMM1142 | 1094754 | 0.27 Control |
| 588874 +  | TSS_003680 PMM0618 | 588622  | 0.26 Control |
| 466610 +  | TSS_002887 PMM0493 | 465840  | 0.25 Control |
| 78295 -   | TSS_010052 PMM0073 | 79154   | 0.24 Control |
| 189333 +  | TSS_000960 PMM0195 | 188865  | 0.24 Control |
| 738964 -  | TSS_014383 PMM0774 | 739095  | 0.24 Control |
| 144965 +  | TSS_000739 PMM0149 | 144701  | 0.23 Control |
| 737785 -  | TSS_014366 PMM0774 | 739095  | 0.22 Control |
| 441185 -  | TSS_012492 PMM0462 | 441340  | 0.22 Control |
| 105240 -  | TSS_010162 PMM0101 | 105946  | 0.22 Control |
| 349634 -  | TSS_011872 PMM0368 | 349709  | 0.21 Control |
| 145715 +  | TSS_000765 PMM0149 | 144701  | 0.21 Control |
| 398719 +  | TSS_002519 PMM0420 | 398147  | 0.21 Control |
| 1373532 + | TSS_007576 PMM1435 | 1373308 | 0.21 Control |
| 145511 +  | TSS_000754 PMM0149 | 144701  | 0.20 Control |
| 703511 +  | TSS_004164 PMM0742 | 703275  | 0.20 Control |
| 738854 -  | TSS_014379 PMM0774 | 739095  | 0.20 Control |
| 218599 +  | TSS_001138 PMM0224 | 217978  | 0.19 Control |
| 1275591 + | TSS_007141 PMM1323 | 1274764 | 0.19 Control |
| 145211 +  | TSS_000745 PMM0149 | 144701  | 0.17 Control |
| 864270 +  | TSS_004816 PMM0901 | 863809  | 0.17 Control |
| 1238666 - | TSS_017213 PMM1287 | 1238943 | 0.16 Control |
| 1549235 - | TSS_021156 PMM1619 | 1549798 | 0.16 Control |
| 1422856 - | TSS_019005 PMM1485 | 1423524 | 0.16 Control |
| 1644804 + | TSS_009619 PMM1706 | 1644415 | 0.16 Control |
| 218695 +  | TSS_001143 PMM0224 | 217978  | 0.16 Control |
| 143021 -  | TSS_010320 PMM0147 | 143883  | 0.15 Control |
| 1624375 + | TSS_009510 PMM1689 | 1623168 | 0.15 Control |
| 125778 +  | TSS_000632 PMM0128 | 125323  | 0.15 Control |
| 1131719 + | TSS_006311 PMM1186 | 1131150 | 0.14 Control |
| 1401712 - | TSS_018480 PMM1467 | 1403187 | 0.14 Control |
| 220578 -  | TSS_010821 PMM0226 | 221632  | 0.14 Control |
| 863967 +  | TSS_004806 PMM0901 | 863809  | 0.14 Control |
| 1422752 - | TSS_019004 PMM1485 | 1423524 | 0.13 Control |
| 611411 +  | TSS_003813 PMM0642 | 610941  | 0.13 Control |
| 498247 +  | TSS_003041 PMM0526 | 497550  | 0.13 Control |
| 1423046 - | TSS_019006 PMM1485 | 1423524 | 0.13 Control |
| 253836 +  | TSS_001391 PMM0263 | 252586  | 0.13 Control |
| 498643 +  | TSS_003048 PMM0526 | 497550  | 0.12 Control |
| 160552 -  | TSS_010442 PMM0164 | 160684  | 0.12 Control |
| 497254 +  | TSS_003020 PMM0525 | 496211  | 0.12 Control |
| 803506 -  | TSS_014887 PMM0844 | 804298  | 0.12 Control |
| 1253102 + | TSS_006915 PMM1301 | 1252970 | 0.12 Control |
| 132594 +  | TSS_000675 PMM0134 | 132109  | 0.11 Control |
| 1034423 - | TSS_016144 PMM1088 | 1034569 | 0.11 Control |
| 205032 +  | TSS_001030 PMM0211 | 204910  | 0.11 Control |
| 1372986 + | TSS_007570 PMM1434 | 1371646 | 0.11 Control |
| 1529501 - | TSS_020964 PMM1600 | 1530254 | 0.11 Control |
| 31393 -   | TSS_009806 PMM0032 | 31536   | 0.10 Control |
| 1022762 - | TSS_015837 PMM1080 | 1023493 | 0.10 Control |
| 1240490 - | TSS_017232 PMM1289 | 1241067 | 0.10 Control |
| 747387 -  | TSS_014538 PMM0785 | 747664  | 0.10 Control |
| 384162 +  | TSS_002423 PMM0405 | 383585  | 0.10 Control |
| 1346497 - | TSS_017730 PMM1400 | 1346865 | 0.09 Control |
| 145139 +  | TSS_000744 PMM0149 | 144701  | 0.09 Control |
| 1464704 - | TSS_019746 PMM1524 | 1466574 | 0.09 Control |
| 447456 +  | TSS_002741 PMM0472 | 447381  | 0.09 Control |
| 27552 +   | TSS_000183 PMM0026 | 27273   | 0.09 Control |
| 92216 -   | TSS_010120 PMM0086 | 92293   | 0.08 Control |
| 724438 -  | TSS_014296 PMM0760 | 724578  | 0.08 Control |
| 857485 -  | TSS_015161 PMM0894 | 857549  | 0.08 Control |
| 1008963 + | TSS_005417 PMM1066 | 1007850 | 0.07 Control |
| 221154 -  | TSS_010854 PMM0226 | 221632  | 0.07 Control |
| 299950 -  | TSS_011379 PMM0312 | 300325  | 0.07 Control |
| 1642444 - | TSS_022043 PMM1704 | 1643399 | 0.06 Control |
| 208811 -  | TSS_010711 PMM0214 | 208944  | 0.06 Control |
| 384720 +  | TSS_002453 PMM0405 | 383585  | 0.06 Control |
| 384519 +  | TSS_002440 PMM0405 | 383585  | 0.06 Control |
| 1645357 - | TSS_022164 PMM1707 | 1646216 | 0.06 Control |
| 1465661 - | TSS_019863 PMM1524 | 1466574 | 0.06 Control |
| 457755 -  | TSS_012661 PMM0483 | 457975  | 0.06 Control |
| 299836 -  | TSS_011375 PMM0312 | 300325  | 0.06 Control |
| 119905 +  | TSS_000600 PMM0121 | 119798  | 0.05 Control |
| 1223572 - | TSS_016991 PMM1269 | 1224017 | 0.05 Control |
| 208529 -  | TSS_010696 PMM0214 | 208944  | 0.05 Control |
| 221070 -  | TSS_010850 PMM0226 | 221632  | 0.05 Control |
| 166516 +  | TSS_000889 PMM0172 | 165910  | 0.05 Control |
| 207728 -  | TSS_010664 PMM0214 | 208944  | 0.04 Control |
| 310880 +  | TSS_001841 PMM0326 | 310480  | 0.04 Control |
| 1642285 - | TSS_022020 PMM1704 | 1643399 | 0.04 Control |
| 147332 +  | TSS_000792 PMM0150 | 146794  | 0.04 Control |
| 1083716 + | TSS_005789 PMM1132 | 1082218 | 0.04 Control |
| 1240970 - | TSS_017248 PMM1289 | 1241067 | 0.04 Control |

|           |            |         |         |       |              |
|-----------|------------|---------|---------|-------|--------------|
| 1549500 - | TSS_021169 | PMM1619 | 1549798 | 0.04  | Control      |
| 431182 -  | TSS_012320 | PMM0452 | 432317  | 0.04  | Control      |
| 432210 -  | TSS_012388 | PMM0452 | 432317  | 0.04  | Control      |
| 147807 +  | TSS_000799 | PMM0150 | 146794  | 0.04  | Control      |
| 310023 +  | TSS_001792 | PMM0325 | 309786  | 0.03  | Control      |
| 868162 -  | TSS_015227 | PMM0907 | 869447  | 0.03  | Control      |
| 1642606 - | TSS_022059 | PMM1704 | 1643399 | 0.03  | Control      |
| 1131989 + | TSS_006317 | PMM1186 | 1131150 | 0.03  | Control      |
| 195809 -  | TSS_010551 | PMM0202 | 196137  | 0.03  | Control      |
| 676283 +  | TSS_004102 | PMM0710 | 675828  | 0.03  | Control      |
| 927406 +  | TSS_005145 | PMM0970 | 926558  | 0.03  | Control      |
| 927259 +  | TSS_005142 | PMM0970 | 926558  | 0.02  | Control      |
| 926646 +  | TSS_005123 | PMM0970 | 926558  | 0.02  | Control      |
| 1138412 + | TSS_006439 | PMM1191 | 1136852 | 0.01  | Control      |
| 1068972 - | TSS_022850 | PMM1121 | 1069447 | 13.01 | Experimental |
| 1557493 - | TSS_028288 | PMM1629 | 1558291 | 10.41 | Experimental |
| 900041 +  | TSS_007669 | PMM0941 | 899977  | 10.31 | Experimental |
| 468497 -  | TSS_018015 | PMM0495 | 469000  | 9.52  | Experimental |
| 1633014 + | TSS_013585 | PMM1697 | 1632609 | 7.42  | Experimental |
| 491260 +  | TSS_005334 | PMM0519 | 490706  | 6.82  | Experimental |
| 80289 +   | TSS_000660 | PMM0075 | 79823   | 6.46  | Experimental |
| 223706 -  | TSS_015742 | PMM0228 | 223847  | 5.20  | Experimental |
| 140081 -  | TSS_014893 | PMM0143 | 140446  | 4.75  | Experimental |
| 123779 +  | TSS_000953 | PMM0126 | 123251  | 4.16  | Experimental |
| 704397 -  | TSS_019669 | PMM0743 | 705815  | 4.02  | Experimental |
| 258478 -  | TSS_016059 | PMM0268 | 258616  | 3.99  | Experimental |
| 763062 +  | TSS_006882 | PMM0804 | 762992  | 3.74  | Experimental |
| 1568020 - | TSS_028672 | PMM1639 | 1569177 | 3.61  | Experimental |
| 354391 +  | TSS_004218 | PMM0370 | 352957  | 3.31  | Experimental |
| 781041 +  | TSS_007009 | PMM0825 | 779053  | 3.08  | Experimental |
| 1380027 + | TSS_011134 | PMM1443 | 1379949 | 2.96  | Experimental |
| 353381 +  | TSS_004069 | PMM0370 | 352957  | 2.69  | Experimental |
| 12129 +   | TSS_000105 | PMM0010 | 11772   | 2.54  | Experimental |
| 1447936 - | TSS_026113 | PMM1509 | 1449812 | 2.46  | Experimental |
| 197771 -  | TSS_015365 | PMM0205 | 198069  | 2.42  | Experimental |
| 1018655 - | TSS_021747 | PMM1075 | 1019366 | 2.41  | Experimental |
| 1024480 + | TSS_008664 | PMM1081 | 1023698 | 2.35  | Experimental |
| 176661 +  | TSS_001491 | PMM0185 | 176333  | 2.26  | Experimental |
| 1567303 - | TSS_028641 | PMM1639 | 1569177 | 2.22  | Experimental |
| 197876 -  | TSS_015373 | PMM0205 | 198069  | 2.21  | Experimental |
| 747387 -  | TSS_020214 | PMM0785 | 747664  | 2.15  | Experimental |
| 860406 -  | TSS_020949 | PMM0897 | 860980  | 2.15  | Experimental |
| 1589048 + | TSS_013226 | PMM1657 | 1588301 | 2.07  | Experimental |
| 96530 +   | TSS_000795 | PMM0091 | 96428   | 1.94  | Experimental |
| 1454166 + | TSS_011834 | PMM1512 | 1450891 | 1.93  | Experimental |
| 154809 -  | TSS_015069 | PMM0159 | 155061  | 1.81  | Experimental |
| 154860 -  | TSS_015079 | PMM0159 | 155061  | 1.77  | Experimental |
| 981600 +  | TSS_008375 | PMM1038 | 981473  | 1.76  | Experimental |
| 1420706 - | TSS_025705 | PMM1485 | 1423524 | 1.67  | Experimental |
| 1363264 - | TSS_024893 | PMM1422 | 1363417 | 1.57  | Experimental |
| 1422856 - | TSS_025770 | PMM1485 | 1423524 | 1.54  | Experimental |
| 1019222 - | TSS_021849 | PMM1075 | 1019366 | 1.50  | Experimental |
| 1454543 + | TSS_011846 | PMM1512 | 1450891 | 1.49  | Experimental |
| 1469172 + | TSS_011941 | PMM1526 | 1468704 | 1.42  | Experimental |
| 628505 -  | TSS_019027 | PMM0660 | 628656  | 1.36  | Experimental |
| 1036076 + | TSS_008730 | PMM1090 | 1035252 | 1.34  | Experimental |
| 150290 +  | TSS_001294 | PMM0152 | 149428  | 1.31  | Experimental |
| 1126503 - | TSS_023437 | PMM1178 | 1127288 | 1.29  | Experimental |
| 129278 -  | TSS_014851 | PMM0131 | 130071  | 1.27  | Experimental |
| 189007 +  | TSS_001518 | PMM0195 | 188865  | 1.27  | Experimental |
| 746286 -  | TSS_020205 | PMM0784 | 746584  | 1.26  | Experimental |
| 121450 -  | TSS_014816 | PMM0123 | 121764  | 1.16  | Experimental |
| 1448485 - | TSS_026157 | PMM1509 | 1449812 | 1.15  | Experimental |
| 1490794 + | TSS_012124 | PMM1562 | 1490373 | 1.12  | Experimental |
| 1294828 - | TSS_024392 | PMM1342 | 1295547 | 1.09  | Experimental |
| 349673 -  | TSS_017086 | PMM0368 | 349709  | 1.07  | Experimental |
| 1245700 + | TSS_009975 | PMM1293 | 1245509 | 1.05  | Experimental |
| 774713 -  | TSS_020416 | PMM0819 | 774773  | 1.03  | Experimental |
| 433897 +  | TSS_004880 | PMM0454 | 433437  | 1.01  | Experimental |
| 143488 -  | TSS_014969 | PMM0147 | 143883  | 1.00  | Experimental |
| 63461 +   | TSS_000483 | PMM0058 | 63116   | 0.94  | Experimental |
| 105437 -  | TSS_014669 | PMM0101 | 105946  | 0.93  | Experimental |
| 128699 -  | TSS_014848 | PMM0131 | 130071  | 0.93  | Experimental |
| 1420978 - | TSS_025720 | PMM1485 | 1423524 | 0.89  | Experimental |
| 155927 -  | TSS_015116 | PMM0160 | 156249  | 0.88  | Experimental |
| 499089 +  | TSS_005510 | PMM0526 | 497550  | 0.87  | Experimental |
| 98015 -   | TSS_014647 | PMM0095 | 98676   | 0.84  | Experimental |
| 1518815 - | TSS_027523 | PMM1589 | 1519244 | 0.84  | Experimental |
| 644589 +  | TSS_006296 | PMM0676 | 643669  | 0.84  | Experimental |
| 1554498 - | TSS_028202 | PMM1625 | 1554856 | 0.83  | Experimental |
| 1059858 + | TSS_008821 | PMM1113 | 1059299 | 0.80  | Experimental |
| 105223 -  | TSS_014665 | PMM0101 | 105946  | 0.78  | Experimental |
| 1122905 + | TSS_009400 | PMM1174 | 1122779 | 0.78  | Experimental |
| 1606665 + | TSS_013382 | PMM1674 | 1606251 | 0.76  | Experimental |
| 1448025 - | TSS_026120 | PMM1509 | 1449812 | 0.76  | Experimental |
| 1628843 - | TSS_029215 | PMM1694 | 1629107 | 0.74  | Experimental |
| 131956 -  | TSS_014865 | PMM0133 | 132089  | 0.72  | Experimental |
| 1332932 - | TSS_024612 | PMM1383 | 1333562 | 0.72  | Experimental |
| 644399 +  | TSS_006291 | PMM0676 | 643669  | 0.71  | Experimental |
| 723763 -  | TSS_019917 | PMM0760 | 724578  | 0.69  | Experimental |
| 497254 +  | TSS_005402 | PMM0525 | 496211  | 0.69  | Experimental |
| 1295467 - | TSS_024423 | PMM1342 | 1295547 | 0.68  | Experimental |
| 466192 +  | TSS_005194 | PMM0493 | 465840  | 0.65  | Experimental |

|           |            |         |         |      |              |
|-----------|------------|---------|---------|------|--------------|
| 27367 +   | TSS_000244 | PMM0026 | 27273   | 0.64 | Experimental |
| 1599097 - | TSS_028992 | PMM1667 | 1599261 | 0.63 | Experimental |
| 125778 +  | TSS_001001 | PMM0128 | 125323  | 0.62 | Experimental |
| 498873 +  | TSS_005478 | PMM0526 | 497550  | 0.62 | Experimental |
| 144023 +  | TSS_001117 | PMM0148 | 143931  | 0.60 | Experimental |
| 207728 -  | TSS_015450 | PMM0214 | 208944  | 0.60 | Experimental |
| 532769 +  | TSS_005766 | PMM0565 | 531701  | 0.59 | Experimental |
| 145715 +  | TSS_001168 | PMM0149 | 144701  | 0.59 | Experimental |
| 1439422 - | TSS_025879 | PMM1500 | 1440282 | 0.58 | Experimental |
| 1423046 - | TSS_025773 | PMM1485 | 1423524 | 0.56 | Experimental |
| 1380210 + | TSS_011135 | PMM1443 | 1379949 | 0.54 | Experimental |
| 398719 +  | TSS_004637 | PMM0420 | 398147  | 0.53 | Experimental |
| 582602 -  | TSS_018857 | PMM0611 | 582767  | 0.52 | Experimental |
| 163563 -  | TSS_015219 | PMM0169 | 163802  | 0.51 | Experimental |
| 1398489 + | TSS_011316 | PMM1465 | 1397666 | 0.50 | Experimental |
| 145511 +  | TSS_001155 | PMM0149 | 144701  | 0.49 | Experimental |
| 493996 -  | TSS_018181 | PMM0522 | 494177  | 0.48 | Experimental |
| 78295 -   | TSS_014555 | PMM0073 | 79154   | 0.48 | Experimental |
| 144965 +  | TSS_001131 | PMM0149 | 144701  | 0.47 | Experimental |
| 220578 -  | TSS_015598 | PMM0226 | 221632  | 0.47 | Experimental |
| 141294 -  | TSS_014931 | PMM0144 | 141905  | 0.46 | Experimental |
| 1224306 - | TSS_023777 | PMM1270 | 1225100 | 0.46 | Experimental |
| 1367686 + | TSS_011008 | PMM1428 | 1367587 | 0.45 | Experimental |
| 1252379 + | TSS_010051 | PMM1300 | 1251088 | 0.45 | Experimental |
| 1491478 + | TSS_012250 | PMM1562 | 1490373 | 0.45 | Experimental |
| 803506 -  | TSS_020584 | PMM0844 | 804298  | 0.45 | Experimental |
| 145211 +  | TSS_001137 | PMM0149 | 144701  | 0.44 | Experimental |
| 154964 -  | TSS_015097 | PMM0159 | 155061  | 0.44 | Experimental |
| 78158 -   | TSS_014552 | PMM0073 | 79154   | 0.44 | Experimental |
| 457755 -  | TSS_017991 | PMM0483 | 457975  | 0.44 | Experimental |
| 299836 -  | TSS_016360 | PMM0312 | 300325  | 0.43 | Experimental |
| 322674 +  | TSS_003860 | PMM0333 | 322362  | 0.43 | Experimental |
| 1421293 - | TSS_025730 | PMM1485 | 1423524 | 0.42 | Experimental |
| 27552 +   | TSS_000247 | PMM0026 | 27273   | 0.42 | Experimental |
| 757372 -  | TSS_020252 | PMM0796 | 757822  | 0.41 | Experimental |
| 299950 -  | TSS_016361 | PMM0312 | 300325  | 0.39 | Experimental |
| 205343 +  | TSS_001635 | PMM0211 | 204910  | 0.39 | Experimental |
| 218599 +  | TSS_002225 | PMM0224 | 217978  | 0.38 | Experimental |
| 611411 +  | TSS_006094 | PMM0642 | 610941  | 0.38 | Experimental |
| 15146 +   | TSS_000146 | PMM0012 | 14568   | 0.37 | Experimental |
| 1300005 + | TSS_010667 | PMM1349 | 1299740 | 0.37 | Experimental |
| 498249 +  | TSS_005443 | PMM0526 | 497550  | 0.35 | Experimental |
| 1218465 - | TSS_023642 | PMM1264 | 1219792 | 0.34 | Experimental |
| 1440154 - | TSS_025922 | PMM1500 | 1440282 | 0.34 | Experimental |
| 78218 -   | TSS_014553 | PMM0073 | 79154   | 0.34 | Experimental |
| 92441 +   | TSS_000752 | PMM0087 | 92350   | 0.33 | Experimental |
| 1034417 - | TSS_022375 | PMM1088 | 1034569 | 0.33 | Experimental |
| 228037 +  | TSS_002293 | PMM0235 | 227959  | 0.32 | Experimental |
| 1645357 - | TSS_029444 | PMM1707 | 1646216 | 0.31 | Experimental |
| 588874 +  | TSS_005927 | PMM0618 | 588622  | 0.31 | Experimental |
| 1033430 - | TSS_022195 | PMM1088 | 1034569 | 0.29 | Experimental |
| 143021 -  | TSS_014962 | PMM0147 | 143883  | 0.29 | Experimental |
| 160552 -  | TSS_015186 | PMM0164 | 160684  | 0.28 | Experimental |
| 1253102 + | TSS_010066 | PMM1301 | 1252970 | 0.28 | Experimental |
| 155334 -  | TSS_015103 | PMM0160 | 156249  | 0.28 | Experimental |
| 1371875 + | TSS_011034 | PMM1434 | 1371646 | 0.27 | Experimental |
| 1499500 - | TSS_027366 | PMM1570 | 1499639 | 0.26 | Experimental |
| 737882 -  | TSS_020050 | PMM0774 | 739095  | 0.25 | Experimental |
| 1549235 - | TSS_027936 | PMM1619 | 1549798 | 0.25 | Experimental |
| 737771 -  | TSS_020038 | PMM0774 | 739095  | 0.24 | Experimental |
| 349634 -  | TSS_017084 | PMM0368 | 349709  | 0.23 | Experimental |
| 1609831 + | TSS_013402 | PMM1676 | 1609627 | 0.23 | Experimental |
| 145139 +  | TSS_001136 | PMM0149 | 144701  | 0.23 | Experimental |
| 205032 +  | TSS_001621 | PMM0211 | 204910  | 0.22 | Experimental |
| 31393 -   | TSS_014141 | PMM0032 | 31536   | 0.22 | Experimental |
| 1131452 + | TSS_009499 | PMM1186 | 1131150 | 0.22 | Experimental |
| 1240490 - | TSS_024057 | PMM1289 | 1241067 | 0.21 | Experimental |
| 160039 -  | TSS_015153 | PMM0164 | 160684  | 0.21 | Experimental |
| 1008963 + | TSS_008515 | PMM1066 | 1007850 | 0.20 | Experimental |
| 1507214 - | TSS_027453 | PMM1577 | 1508411 | 0.20 | Experimental |
| 724438 -  | TSS_019979 | PMM0760 | 724578  | 0.20 | Experimental |
| 977946 +  | TSS_008346 | PMM1033 | 977043  | 0.20 | Experimental |
| 1131719 + | TSS_009506 | PMM1186 | 1131150 | 0.19 | Experimental |
| 119905 +  | TSS_000937 | PMM0121 | 119798  | 0.19 | Experimental |
| 384144 +  | TSS_004505 | PMM0405 | 383585  | 0.19 | Experimental |
| 386764 -  | TSS_017359 | PMM0407 | 387174  | 0.18 | Experimental |
| 738857 -  | TSS_020089 | PMM0774 | 739095  | 0.18 | Experimental |
| 1239822 + | TSS_009912 | PMM1288 | 1239042 | 0.16 | Experimental |
| 384720 +  | TSS_004566 | PMM0405 | 383585  | 0.16 | Experimental |
| 1523398 - | TSS_027547 | PMM1594 | 1523570 | 0.15 | Experimental |
| 328681 -  | TSS_016997 | PMM0339 | 329348  | 0.14 | Experimental |
| 1636527 + | TSS_013754 | PMM1700 | 1635526 | 0.13 | Experimental |
| 306125 -  | TSS_016557 | PMM0321 | 306386  | 0.13 | Experimental |
| 1401712 - | TSS_025249 | PMM1467 | 1403187 | 0.13 | Experimental |
| 901817 -  | TSS_021079 | PMM0945 | 905299  | 0.13 | Experimental |
| 384519 +  | TSS_004541 | PMM0405 | 383585  | 0.13 | Experimental |
| 217197 +  | TSS_001906 | PMM0223 | 216745  | 0.12 | Experimental |
| 1022762 - | TSS_021876 | PMM1080 | 1023493 | 0.12 | Experimental |
| 310880 +  | TSS_002942 | PMM0326 | 310480  | 0.11 | Experimental |
| 1465661 - | TSS_019863 | PMM1524 | 1466574 | 0.11 | Experimental |
| 32608 -   | TSS_014167 | PMM0035 | 33713   | 0.11 | Experimental |
| 383961 +  | TSS_004480 | PMM0405 | 383585  | 0.11 | Experimental |
| 1008779 + | TSS_008503 | PMM1066 | 1007850 | 0.10 | Experimental |

|           |                    |         |                   |
|-----------|--------------------|---------|-------------------|
| 431182 -  | TSS_017698 PMM0452 | 432317  | 0.09 Experimental |
| 32866 -   | TSS_014189 PMM0035 | 33713   | 0.09 Experimental |
| 310023 +  | TSS_002878 PMM0325 | 309786  | 0.09 Experimental |
| 1131989 + | TSS_009521 PMM1186 | 1131150 | 0.08 Experimental |
| 1083716 + | TSS_008966 PMM1132 | 1082218 | 0.08 Experimental |
| 1238666 - | TSS_024013 PMM1287 | 1238943 | 0.08 Experimental |
| 166513 +  | TSS_001406 PMM0172 | 165910  | 0.08 Experimental |
| 1549500 - | TSS_027954 PMM1619 | 1549798 | 0.07 Experimental |
| 92216 -   | TSS_014618 PMM0086 | 92293   | 0.07 Experimental |
| 166228 +  | TSS_001376 PMM0172 | 165910  | 0.07 Experimental |
| 734570 +  | TSS_006758 PMM0770 | 734269  | 0.06 Experimental |
| 927441 +  | TSS_007993 PMM0970 | 926558  | 0.06 Experimental |
| 1223575 - | TSS_023765 PMM1269 | 1224017 | 0.05 Experimental |
| 926661 +  | TSS_007807 PMM0970 | 926558  | 0.05 Experimental |
| 1009058 + | TSS_008517 PMM1066 | 1007850 | 0.04 Experimental |
| 147473 +  | TSS_001238 PMM0150 | 146794  | 0.03 Experimental |
| 147440 +  | TSS_001236 PMM0150 | 146794  | 0.03 Experimental |
| 147116 +  | TSS_001224 PMM0150 | 146794  | 0.03 Experimental |
| 1138412 + | TSS_009588 PMM1191 | 1136852 | 0.03 Experimental |
| 253072 +  | TSS_002460 PMM0263 | 252586  | 0.03 Experimental |
| 252875 +  | TSS_002439 PMM0263 | 252586  | 0.03 Experimental |
| 147332 +  | TSS_001231 PMM0150 | 146794  | 0.02 Experimental |
| 147971 +  | TSS_001271 PMM0150 | 146794  | 0.02 Experimental |
