# Supplementary material for: Nitrogen cost minimization is promoted by structural changes in the transcriptome of N-deprived Prochlorococcus cells
Source: PubMed Central journal article supplement (PMC5607370; doi:10.1038/ismej.2017.88), 2017-06-06
Supplement: ismej201788x21.pdf [file ismej201788x21.pdf]

Table S14. Sequence IDs and protein threading results from transcripts with significant internal transcriptional start sites in MED4 under N-limitation. The sequences highlighted in bold contain internal start sites with an NtcA binding site during transcription and a pyrimidine binding site for protein S1 binding during translation. The genes in this table combine for more than 90% of the gene expression during the treatment.

| Sequence ID | Structure with best match | Model Confidence | Residues aligned | Amino Acids in Sequence | Difference Between Full length and Internal Protein Length | CDD Domain Affected by Internal TSS                                                                                                 | Accession Number of CDD Domain Affected | Result                                                               | NtcA Binding | Pyrimidine Rich | Theoretical N-Savings (mol N/mol protein) |
|-------------|---------------------------|------------------|------------------|-------------------------|------------------------------------------------------------|-------------------------------------------------------------------------------------------------------------------------------------|-----------------------------------------|----------------------------------------------------------------------|--------------|-----------------|-------------------------------------------|
| PMM0211     | <b>c1hvuA</b>             | 100              | 301              | 318                     |                                                            |                                                                                                                                     |                                         |                                                                      |              |                 |                                           |
| PMM0211 Int | <b>c1hvuA</b>             | 100              | 241              | 251                     | 67                                                         | None                                                                                                                                | N/A                                     | Protein aligns by MSA to major structural elements of PDB structures | Yes          | Yes             | 79                                        |
| PMM0214     | <b>c5da0A</b>             | 100              | 460              | 554                     |                                                            |                                                                                                                                     |                                         |                                                                      |              |                 |                                           |
| PMM0214 Int | <b>c3nu0A</b>             | 99               | 110              | 156                     | 398                                                        | Possible specific transcription of HCO <sub>2</sub> cotransp super family domain                                                    | c123746                                 | Protein has specific structural element or subunit transcribed       | Yes          | Yes             | 474                                       |
| PMM0370     | <b>c246A</b>              | 100              | 361              | 561                     |                                                            |                                                                                                                                     |                                         |                                                                      |              |                 |                                           |
| PMM0370 Int | <b>c246A</b>              | 100              | 365              | 406                     | 155                                                        | None                                                                                                                                | N/A                                     | Protein aligns by MSA to major structural elements of PDB structures | Yes          | Yes             | 210                                       |
| PMM1075     | <b>c2b5oA</b>             | 100              | 288              | 373                     |                                                            |                                                                                                                                     |                                         |                                                                      |              |                 |                                           |
| PMM1075 Int | <b>c1fbcA</b>             | 100              | 234              | 238                     | 135                                                        | None                                                                                                                                | N/A                                     | Protein aligns by MSA to major structural elements of PDB structures | Yes          | Yes             | 179                                       |
| PMM1485     | <b>c3u0C</b>              | 100              | 1032             | 1100                    |                                                            |                                                                                                                                     |                                         |                                                                      |              |                 |                                           |
| PMM1485 Int | <b>c3u0C</b>              | 100              | 936              | 988                     | 112                                                        | Possible modification of RNA polymerase beta subunit as almost entire protein is single domain                                      | cd09653                                 | Protein aligns by MSA to major structural elements of PDB structures | Yes          | Yes             | 155                                       |
| PMM1512     | <b>c1lm1A</b>             | 100              | 1461             | 1521                    |                                                            |                                                                                                                                     |                                         |                                                                      |              |                 |                                           |
| PMM1512 Int | <b>c2vdcF</b>             | 100              | 410              | 413                     | 1108                                                       | Possible specific transcription of GXGXG superfamily domain.                                                                        | c100239                                 | Protein has specific structural element or subunit transcribed       | Yes          | Yes             | 1501                                      |
| PMM1697     | <b>c4igcX</b>             | 100              | 338              | 339                     |                                                            |                                                                                                                                     |                                         |                                                                      |              |                 |                                           |
| PMM1697 Int | <b>c4igcX</b>             | 100              | 176              | 187                     | 111                                                        | Likely loss of Sigma-70 factor, region 1.2 domain                                                                                   | pfam00140                               | Protein lacks structural element or structure is incomplete          | Yes          | Yes             | 380                                       |
| PMM0063     | <b>c2vc5D</b>             | 91               | 79               | 310                     |                                                            |                                                                                                                                     |                                         |                                                                      |              |                 |                                           |
| PMM0063 Int | <b>c4b4aA</b>             | 89               | 19               | 205                     | 105                                                        | Possible modification of the Ycf66 protein N-terminus domain                                                                        | pfam07444                               | Protein lacks structural element or structure is incomplete          | No           | No              | 136                                       |
| PMM0087     | <b>c2k2cA</b>             | 11               | 13               | 112                     |                                                            |                                                                                                                                     |                                         |                                                                      |              |                 |                                           |
| PMM0087 Int | <b>c2k2cA</b>             | 14               | 13               | 95                      | 17                                                         | No domains detected                                                                                                                 | N/A                                     | Protein lacks structural element or structure is incomplete          | No           | No              | 28                                        |
| PMM0164     | <b>c5knD</b>              | 100              | 393              | 417                     |                                                            |                                                                                                                                     |                                         |                                                                      |              |                 |                                           |
| PMM0164 Int | <b>d1v8za1</b>            | 100              | 371              | 377                     | 40                                                         | None                                                                                                                                | N/A                                     | Protein aligns by MSA to major structural elements of PDB structures | No           | No              | 59                                        |
| PMM0263     | <b>c5axwB</b>             | 100              | 419              | 486                     |                                                            |                                                                                                                                     |                                         |                                                                      |              |                 |                                           |
| PMM0263 Int | <b>c5axwB</b>             | 100              | 403              | 405                     | 81                                                         | None                                                                                                                                | N/A                                     | Protein aligns by MSA to major structural elements of PDB structures | No           | No              | 113                                       |
| PMM0368     | <b>c3nu0</b>              | 49               | 73               | 105                     |                                                            |                                                                                                                                     |                                         |                                                                      |              |                 |                                           |
| PMM0368 Int | <b>d1kp0a1</b>            | 53               | 31               | 84                      | 21                                                         | First 16 aas of a Domain of Unknown Function                                                                                        | pfam11746                               | Protein lacks structural element or structure is incomplete          | No           | Yes             | 29                                        |
| PMM0445     | <b>c1m56G</b>             | 100              | 512              | 544                     |                                                            |                                                                                                                                     |                                         |                                                                      |              |                 |                                           |
| PMM0445 Int | <b>c1m56G</b>             | 100              | 451              | 463                     | 81                                                         | Possible modification of cytochrome c oxidase subunit I as almost entire protein is single domain                                   | TIGR02891                               | Protein aligns by MSA to major structural elements of PDB structures | No           | Yes             | 105                                       |
| PMM0545     | <b>c3aerC</b>             | 100              | 407              | 421                     |                                                            |                                                                                                                                     |                                         |                                                                      |              |                 |                                           |
| PMM0545 Int | <b>c3aerC</b>             | 100              | 256              | 263                     | 158                                                        | Possible modification of light-independent protochlorophyllide reductase subunit n as almost entire protein is single domain        | PRK02842                                | Protein aligns by MSA to major structural elements of PDB structures | No           | Yes             | 210                                       |
| PMM0661     | <b>d111a</b>              | 100              | 653              | 805                     |                                                            |                                                                                                                                     |                                         |                                                                      |              |                 |                                           |
| PMM0661 Int | <b>d111a</b>              | 100              | 599              | 706                     | 99                                                         | None                                                                                                                                | N/A                                     | Protein aligns by MSA to major structural elements of PDB structures | No           | Yes             | 144                                       |
| PMM0684     | <b>d1smpl</b>             | 52               | 23               | 117                     |                                                            |                                                                                                                                     |                                         |                                                                      |              |                 |                                           |
| PMM0684 Int | <b>d2v3za1</b>            | 40               | 32               | 105                     | 12                                                         | None                                                                                                                                | N/A                                     | Protein lacks structural element or structure is incomplete          | No           | No              | 15                                        |
| PMM0687     | <b>c3adaA</b>             | 24               | 18               | 111                     |                                                            |                                                                                                                                     |                                         |                                                                      |              |                 |                                           |
| PMM0687 Int | <b>c3adaA</b>             | 40               | 27               | 89                      | 22                                                         | No domains detected                                                                                                                 | N/A                                     | Protein lacks structural element or structure is incomplete          | Yes          | Yes             | 36                                        |
| PMM0804     | <b>c3a9qB</b>             | 100              | 177              | 184                     |                                                            |                                                                                                                                     |                                         |                                                                      |              |                 |                                           |
| PMM0804 Int | <b>c3a9qB</b>             | 100              | 160              | 166                     | 18                                                         | None                                                                                                                                | N/A                                     | Protein aligns by MSA to major structural elements of PDB structures | No           | No              | 24                                        |
| PMM0872     | <b>c4a94D</b>             | 73               | 18               | 82                      |                                                            |                                                                                                                                     |                                         |                                                                      |              |                 |                                           |
| PMM0872 Int | <b>c4a94D</b>             | 73               | 18               | 81                      | 1                                                          | No domains detected                                                                                                                 | N/A                                     | Protein lacks structural element or structure is incomplete          | No           | Yes             | 1                                         |
| PMM0970     | <b>d1o0oB</b>             | 100              | 368              | 439                     |                                                            |                                                                                                                                     |                                         |                                                                      |              |                 |                                           |
| PMM0970 Int | <b>d1o0oB</b>             | 100              | 357              | 381                     | 58                                                         | None                                                                                                                                | N/A                                     | Protein aligns by MSA to major structural elements of PDB structures | No           | Yes             | 72                                        |
| PMM1077     | <b>c4ev8A</b>             | 100              | 228              | 375                     |                                                            |                                                                                                                                     |                                         |                                                                      |              |                 |                                           |
| PMM1077 Int | <b>c4ev8A</b>             | 100              | 207              | 226                     | 149                                                        | None                                                                                                                                | N/A                                     | Protein has specific structural element or subunit transcribed       | No           | Yes             | 211                                       |
| PMM1123     | <b>d4lgA</b>              | 33               | 30               | 237                     |                                                            |                                                                                                                                     |                                         |                                                                      |              |                 |                                           |
| PMM1123 Int | <b>d1o09a</b>             | 19               | 13               | 180                     | 57                                                         | None                                                                                                                                | N/A                                     | Protein lacks structural element or structure is incomplete          | No           | Yes             | 88                                        |
| PMM1158     | <b>c2axc</b>              | 100              | 446              | 460                     |                                                            |                                                                                                                                     |                                         |                                                                      |              |                 |                                           |
| PMM1158 Int | <b>c2axc</b>              | 100              | 416              | 416                     | 44                                                         | Possible modification of the photosystem ii cp43 protein as almost entire protein is single domain                                  | TIGR01153                               | Protein aligns by MSA to major structural elements of PDB structures | Yes          | No              | 64                                        |
| PMM1186     | <b>3wvfA</b>              | 100              | 183              | 379                     |                                                            |                                                                                                                                     |                                         |                                                                      |              |                 |                                           |
| PMM1186 Int | <b>c3wvfA</b>             | 100              | 177              | 288                     | 91                                                         | Possible modification of the membrane protein insertase yidC protein as almost entire protein is single domain                      | PRK02654                                | Protein aligns by MSA to major structural elements of PDB structures | No           | Yes             | 120                                       |
| PMM1301     | <b>c3n5mb</b>             | 100              | 392              | 417                     |                                                            |                                                                                                                                     |                                         |                                                                      |              |                 |                                           |
| PMM1301 Int | <b>c4vndD</b>             | 100              | 243              | 245                     | 225                                                        | Possible modification of the acetylornithine aminotransferase protein as almost entire protein is single domain                     | PRK02627                                | Protein aligns by MSA to major structural elements of PDB structures | No           | No              | 229                                       |
| PMM1312     | <b>c5f4hf</b>             | 100              | 159              | 369                     |                                                            |                                                                                                                                     |                                         |                                                                      |              |                 |                                           |
| PMM1312 Int | <b>c5f4hf</b>             | 100              | 159              | 368                     | 1                                                          | Possible specific transcription of (PIT N terminus) domain                                                                          | cd09877                                 | Protein has specific structural element or subunit transcribed       | No           | Yes             | 1                                         |
| PMM1434     | <b>c4my4A</b>             | 100              | 500              | 540                     |                                                            |                                                                                                                                     |                                         |                                                                      |              |                 |                                           |
| PMM1434 Int | <b>c4my4A</b>             | 100              | 449              | 474                     | 66                                                         | Possible modification of the 2,3-bisphosphoglycerate-independent phosphoglycerate protein as almost entire protein is single domain | cd16010                                 | Protein aligns by MSA to major structural elements of PDB structures | No           | No              | 89                                        |
| PMM1625     | <b>c3dbyC</b>             | 100              | 463              | 475                     |                                                            |                                                                                                                                     |                                         |                                                                      |              |                 |                                           |
| PMM1625 Int | <b>c3u58D</b>             | 100              | 339              | 339                     | 136                                                        | loss of the beginning amino acids in the homotetramer interface on conserved domain SAHH                                            | PRK05476                                | Protein aligns by MSA to major structural elements of PDB structures | No           | No              | 178                                       |
| PMM1636     | <b>c5imrX</b>             | 100              | 162              | 190                     |                                                            |                                                                                                                                     |                                         |                                                                      |              |                 |                                           |
| PMM1636 Int | <b>c5imrX</b>             | 100              | 107              | 119                     | 71                                                         | loss of part of translation initiation factor 3 N terminal domain                                                                   | pfam05198                               | Protein aligns by MSA to major structural elements of PDB structures | No           | Yes             | 113                                       |
| PMM1642     | <b>d2gexa1</b>            | 100              | 124              | 146                     |                                                            |                                                                                                                                     |                                         |                                                                      |              |                 |                                           |
| PMM1642 Int | <b>d2gexa1</b>            | 100              | 94               | 111                     | 35                                                         | loss of the beginning amino acids in the Snoal-like domain                                                                          | pfam12680                               | Protein aligns by MSA to major structural elements of PDB structures | No           | Yes             | 111                                       |
