# Supplementary material for: Nitrogen cost minimization is promoted by structural changes in the transcriptome of N-deprived Prochlorococcus cells
Source: PubMed Central journal article supplement (PMC5607370; doi:10.1038/ismej.2017.88), 2017-06-06
Supplement: ismej201788x22.pdf [file ismej201788x22.pdf]

Table S15: Relative number of pyrimidine-rich regions and Possible NtcA binding sites

| Pyrimidine Rich Regions |       | NtcA Binding Sites |
|-------------------------|-------|--------------------|
| 10mer                   | 12mer |                    |
| 959                     | 438   | 287                |

\* Pyrimidine-rich regions were 80% pyrimidine within 100bp of annotated translational start site

\*\* NtcA binding sites were discovered based on published motifs and were within 100 bp of annotated translation start site.
