# Supplementary material for: Nitrogen cost minimization is promoted by structural changes in the transcriptome of N-deprived Prochlorococcus cells
Source: PubMed Central journal article supplement (PMC5607370; doi:10.1038/ismej.2017.88), 2017-06-06
Supplement: ismej201788x23.pdf [file ismej201788x23.pdf]

Table S16. Autocorrelation of Expression Values for Three Datasets -- This study all data, This study top 50% expression values and Tolonen et al. (2006).

|                      |                             | 3 Hours Post<br>Starvation | 12 Hours Post<br>Starvation | 24 Hours Post<br>Starvation |
|----------------------|-----------------------------|----------------------------|-----------------------------|-----------------------------|
| This study           | 3 Hours Post<br>Starvation  |                            |                             |                             |
|                      | 12 Hours Post<br>Starvation | -0.019                     |                             |                             |
|                      | 24 Hours Post<br>Starvation | -0.012                     | 0.804                       |                             |
| This study (Top 50%) | 3 Hours Post<br>Starvation  |                            |                             |                             |
|                      | 12 Hours Post<br>Starvation | -0.055                     |                             |                             |
|                      | 24 Hours Post<br>Starvation | -0.069                     | 0.892                       |                             |
| Tolonen et al (2006) | 3 Hours Post<br>Starvation  |                            |                             |                             |
|                      | 12 Hours Post<br>Starvation | 0.499                      |                             |                             |
|                      | 24 Hours Post<br>Starvation | 0.549                      | 0.772                       |                             |
