# Supplementary material for: Nitrogen cost minimization is promoted by structural changes in the transcriptome of N-deprived Prochlorococcus cells
Source: PubMed Central journal article supplement (PMC5607370; doi:10.1038/ismej.2017.88), 2017-06-06
Supplement: ismej201788x24.pdf [file ismej201788x24.pdf]

Table S17. Transcripts Described During 3 Hours Post Starvation

| Name    | Log2 Fold Change (3hr) | Standard Error (3hr) | p-value (3hr) | Log2 Fold Change (12hr) | Standard Error (12hr) | p-value (12hr) | Log2 Fold Change (24hr) | Standard Error (24hr) | p-value (24hr) | Category                                 | MIT Annotation                                            |
|---------|------------------------|----------------------|---------------|-------------------------|-----------------------|----------------|-------------------------|-----------------------|----------------|------------------------------------------|-----------------------------------------------------------|
| PMM0373 | 3.49                   | 1.77                 | 7.58E-16      | 1.71                    | 0.34                  | 2.25E-01       | -0.37                   | 0.33                  | 6.37E-01       | Other                                    | Cyanate Lyase                                             |
| PMM1514 | 2.02                   | 1.14                 | 1.04E-01      | -0.11                   | 0.54                  | 6.90E-01       | 0.74                    | 1.23                  | 8.70E-01       | Other                                    | LipA Lipoic Acid Synthetase                               |
| PMM0258 | 2.05                   | 0.69                 | 2.75E-02      | 1.89                    | 0.68                  | 3.00E-02       | 1.81                    | 0.39                  | 1.98E-02       | Other                                    | glyA Serine hydroxymethyltransferase (SHMT)               |
| PMM0246 | 0.57                   | 0.11                 | 7.62E-02      | 1.75                    | 1.1                   | 2.62E-01       | 2.17                    | 1.2                   | 3.48E-03       | Transport and binding proteins           | ntcA Global N regulatory protein                          |
| PMM1294 | 2.39                   | 0.17                 | 1.33E-02      | 0.13                    | 0.33                  | 7.42E-01       | 0.6                     | 0.23                  | 1.00E+00       | Hydrogenase                              | Nickel-containing superoxide dismutase precursor (NISOD)  |
| PMM0550 | 2.93                   | 0.5                  | 4.41E-05      | -1.48                   | 0.14                  | 5.18E-03       | -1.28                   | 0.16                  | 1.09E-01       | CO2 fixation                             | rbcL, cbbL Ribulose bisphosphate carboxylase, large chain |
| PMM0551 | 1.86                   | 1.22                 | 9.56E-07      | -1.09                   | 0.45                  | 2.50E-01       | -1.24                   | 0.01                  | 8.99E-02       | CO2 fixation                             | rbcS, cbbS Ribulose bisphosphate carboxylase, Small chain |
| PMM0263 | 3.67                   | 0.28                 | 2.30E-02      | 2.27                    | 0.07                  | 1.00E+00       | 2.26                    | 0.16                  | 1.00E+00       | Transport and binding proteins           | amt1 Ammonium transporter family                          |
| PMM0970 | 0.22                   | 0                    | 1.00E+00      | 4.07                    | 0.33                  | 3.52E-20       | 2.8                     | 0.19                  | 8.94E-03       | Transport and binding proteins           | urtA putative urea ABC transporter                        |
| PMM0971 | -0.57                  | 0.51                 | 1.00E+00      | 2.37                    | 0.69                  | 4.93E-03       | 1.39                    | 0.27                  | 7.82E-02       | Transport and binding proteins           | urtB putative urea ABC transporter                        |
| PMM0370 | -1.98                  | 0.65                 | 8.85E-02      | 3.85                    | 0.42                  | 5.77E-36       | 3.84                    | 0.21                  | 8.01E-32       | Transport and binding proteins           | putative cyanate ABC transporter (CynA)                   |
| PMM0371 | 0.08                   | 1.01                 | 1.00E+00      | 0.52                    | 0.47                  | 6.90E-01       | 2.65                    | 0.5                   | 2.80E-07       | Transport and binding proteins           | putative cyanate ABC transporter (CynB)                   |
| PMM0471 | -2.38                  | 0.48                 | 4.52E-04      | -0.85                   | 0.25                  | 3.91E-01       | -2.22                   | 1.26                  | 3.49E-04       | Adaptations and atypical conditions      | hli20 possible high light inducible protein               |
| PMM1615 | -2.79                  | 0.07                 | 2.95E-07      | 2.44                    | 0.1                   | 2.30E-04       | 2.15                    | 0.75                  | 1.34E-02       | DNA replication recombination and repair | ruvB Holliday junction DNA helicase RuvB                  |
