# Supplementary material for: Nitrogen cost minimization is promoted by structural changes in the transcriptome of N-deprived Prochlorococcus cells
Source: PubMed Central journal article supplement (PMC5607370; doi:10.1038/ismej.2017.88), 2017-06-06
Supplement: ismej201788x25.pdf [file ismej201788x25.pdf]

Table S18. Ribosomal Transcripts with Significant Regulation 12 and 24 Hours Post Starvation

| Name    | Log2 Fold<br>Change (3hr) | Standard Error<br>(3hr) | p-value (3hr) | Log2 Fold<br>Change (12hr) | Standard Error<br>(12hr) | p-value (12hr) | Log2 Fold<br>Change (24hr) | Standard Error<br>(24hr) | p-value (24hr) | Category           | MIT Annotation                      |
|---------|---------------------------|-------------------------|---------------|----------------------------|--------------------------|----------------|----------------------------|--------------------------|----------------|--------------------|-------------------------------------|
| PMM1706 | 2.06                      | 1.73                    | 1.00E+00      | -4.65                      | 2.38                     | 2.45E-280      | -2.2                       | 1.58                     | 1.22E-20       | Ribosomal proteins | 30S ribosomal protein S6            |
| PMM1558 | -0.82                     | 0.66                    | 1.00E+00      | -4.3                       | 1.26                     | 5.94E-111      | -4.05                      | 1.14                     | 9.49E-112      | Ribosomal proteins | 50S ribosomal protein L3            |
| PMM1537 | -0.34                     | 0.28                    | 1.00E+00      | -3.72                      | 0.62                     | 7.61E-78       | -4.16                      | 0.2                      | 1.72E-169      | Ribosomal proteins | 30S ribosomal protein S13           |
| PMM1538 | -0.55                     | 0.1                     | 1.00E+00      | -3.41                      | 0.63                     | 9.72E-69       | -4.17                      | 0.58                     | 1.41E-210      | Ribosomal proteins | 50S Ribosomal protein L36           |
| PMM1511 | -0.34                     | 0.05                    | 1.00E+00      | -3.43                      | 0.56                     | 7.88E-38       | -3.29                      | 0.07                     | 6.80E-32       | Ribosomal proteins | 30S ribosomal protein S12           |
| PMM1345 | -0.08                     | 0.57                    | 1.00E+00      | -3.13                      | 0.22                     | 1.27E-18       | -2.84                      | 0.36                     | 8.55E-14       | Ribosomal proteins | 50S ribosomal protein L27           |
| PMM0987 | -2.06                     | 0.41                    | 1.63E-01      | -2.96                      | 0.14                     | 7.03E-15       | -3.56                      | 0.56                     | 5.71E-45       | Ribosomal proteins | 30S Ribosomal protein S21           |
| PMM1536 | 0.51                      | 0.06                    | 1.00E+00      | -2.8                       | 0.09                     | 7.22E-13       | -3.01                      | 0.11                     | 1.01E-17       | Ribosomal proteins | 30S ribosomal protein S11           |
| PMM1285 | -0.28                     | 0.03                    | 1.00E+00      | -2.85                      | 0.17                     | 8.81E-14       | -3.29                      | 0.85                     | 4.88E-25       | Ribosomal proteins | 30S Ribosomal protein S16           |
| PMM0202 | 0.89                      | 0.24                    | 1.00E+00      | -2.54                      | 0.41                     | 8.49E-14       | -2.46                      | 0.25                     | 1.68E-11       | Ribosomal proteins | 50S ribosomal protein L10           |
| PMM0870 | -1.44                     | 0.61                    | 1.00E+00      | -2.68                      | 0.77                     | 1.77E-09       | -3.22                      | 0.12                     | 9.39E-35       | Ribosomal proteins | 50S Ribosomal protein L33           |
| PMM0203 | -1.3                      | 0.12                    | 1.00E+00      | -2.46                      | 0.16                     | 4.06E-12       | -1.98                      | 0.32                     | 5.65E-04       | Ribosomal proteins | 50S ribosomal protein L1            |
| PMM1555 | -0.72                     | 0.21                    | 1.00E+00      | -2.44                      | 0.1                      | 2.82E-11       | -2.54                      | 0.42                     | 9.37E-13       | Ribosomal proteins | 50S ribosomal protein L2            |
| PMM0201 | 1.25                      | 0.04                    | 1.00E+00      | -2.45                      | 0                        | 6.75E-09       | -2.3                       | 0.04                     | 5.06E-07       | Ribosomal proteins | 50S ribosomal protein L7/L12        |
| PMM0312 | -0.02                     | 0.11                    | 1.00E+00      | -2.38                      | 0                        | 3.74E-06       | -1.75                      | 0.31                     | 1.55E-03       | Ribosomal proteins | 30S ribosomal protein S1, homolog A |
| PMM1552 | -0.45                     | 0.31                    | 1.00E+00      | -2.26                      | 0.28                     | 5.74E-06       | -2.56                      | 0.04                     | 7.26E-11       | Ribosomal proteins | 30S ribosomal protein S3            |
| PMM1344 | 0.45                      | 0.31                    | 1.00E+00      | -2.28                      | 0.5                      | 5.56E-06       | -2.59                      | 0.36                     | 7.67E-09       | Ribosomal proteins | 50S ribosomal protein L21           |
| PMM1553 | -0.32                     | 0.16                    | 1.00E+00      | -2.23                      | 0.12                     | 5.43E-05       | -2.42                      | 0.54                     | 3.24E-10       | Ribosomal proteins | 50S ribosomal protein L22           |
| PMM1532 | 0.58                      | 0.32                    | 1.00E+00      | -2.19                      | 0.28                     | 1.98E-05       | -2.98                      | 0                        | 2.89E-21       | Ribosomal proteins | 50S ribosomal protein L13           |
| PMM0410 | -0.72                     | 0.58                    | 1.00E+00      | -2.04                      | 0.49                     | 4.05E-08       | -1.68                      | 0.48                     | 3.87E-03       | Ribosomal proteins | 30S ribosomal protein S4            |
| PMM1554 | 0.52                      | 0.22                    | 9.10E-01      | -2.06                      | 0.41                     | 1.35E-04       | -2.15                      | 0.49                     | 1.09E-05       | Ribosomal proteins | 30S Ribosomal protein S19           |
| PMM1661 | -1.53                     | 0.23                    | 7.80E-01      | -2.05                      | 0.94                     | 2.78E-05       | -2.81                      | 0.82                     | 1.57E-20       | Ribosomal proteins | 50S ribosomal protein L35           |
| PMM1556 | -0.73                     | 0.13                    | 1.00E+00      | -1.9                       | 0.6                      | 3.55E-05       | -2.11                      | 0.02                     | 1.76E-05       | Ribosomal proteins | 50S ribosomal protein L23           |
| PMM1545 | -0.48                     | 0.45                    | 8.22E-01      | -2.04                      | 0.08                     | 1.02E-02       | -1                         | 0.3                      | 2.06E-01       | Ribosomal proteins | 30S ribosomal protein S8            |
