# Supplementary material for: Nitrogen cost minimization is promoted by structural changes in the transcriptome of N-deprived Prochlorococcus cells
Source: PubMed Central journal article supplement (PMC5607370; doi:10.1038/ismej.2017.88), 2017-06-06
Supplement: ismej201788x26.pdf [file ismej201788x26.pdf]

Table S19. Predicted Operon Organization by Rockhopper

| Start   | Stop    | Strand | Number of Genes | Genes                                                                                 |
|---------|---------|--------|-----------------|---------------------------------------------------------------------------------------|
| 1412664 | 1423313 | -      | 5               | PMM1481, hli3, rpoC2, rpoC1, rpoB                                                     |
| 1046989 | 1057039 | -      | 6               | recD, recB, PMM1104, recC, PMM1106, pdxJ                                              |
| 1163795 | 1173759 | +      | 10              | PMM1214, PMM1215, PMM1216, PMM1217, rfaE, PMM1219, PMM1220, PMM1221, PMM1222, PMM1223 |
| 1181148 | 1190461 | +      | 10              | PMM1229, PMM1230, PMM1231, PMM1232, rfbD, PMM1234, PMM1235, PMM1236, PMM1237, PMM1238 |
| 747739  | 756909  | -      | 10              | leuB, lpxD, proB, PMM0789, PMM0790, PMM0791, PMM0792, PMM0793, PMM0794, PMM0795       |
| 560476  | 569580  | -      | 7               | PMM0593, ndhD, thrB, PMM0596, thrS, trpS, PMM0599                                     |
| 1473853 | 1481941 | -      | 14              | truA, rplQ, rpoA, rps11, rpsM, rpmJ, adk, secY, rplO, rpsE, rplR, rplF, rpsH, rplE    |
| 1283592 | 1290442 | -      | 7               | PMM1333, lpxB, lpxA, fabZ, lpxC, PMM1338, purC                                        |
| 518725  | 525382  | +      | 7               | csoS1, rbcL, rbcS, csoS2, csoS3, PMM0554, PMM0555                                     |
| 689797  | 696364  | -      | 6               | PMM0727, PMM0728, PMM0729, PMM0730, PMM0731, PMM0732                                  |
| 585243  | 591682  | +      | 6               | PMM0614, PMM0615, PMM0616, murl, sds, acs                                             |
| 414484  | 420509  | +      | 5               | topA, PMM0437, PMM0438, PMM0439, PMM0440                                              |
| 1384483 | 1390439 | -      | 9               | PMM1447, PMM1448, petF, atpC, atpA, atpH, atpD, atpF, atpG, PMM1455                   |
| 713478  | 719193  | +      | 5               | rpsB, tsf, PMM0755, recG, PMM0757                                                     |
| 799312  | 804919  | -      | 5               | fmt, pmBA, tldD, PNIL34, AT103, PMM0845                                               |
| 1482017 | 1487615 | -      | 12              | rplX, rplN, rpsQ, rpl29, rplP, rpsC, rplV, rpsS, rplB, rplW, rplD, rplC               |
| 872358  | 877920  | +      | 5               | pykF, PMM0913, PMM0914, PMM0915, PMM0916                                              |
| 1035266 | 1040822 | +      | 6               | lysA, PMM1091, uppS, BioB, PMM1094, F2110.13                                          |
| 1194486 | 1199985 | -      | 6               | PMM1242, PMM1243, PMM1244, PMM1245, PMM1246, PMM1247                                  |
| 1089194 | 1094685 | +      | 3               | PMM1139, polA, cysS                                                                   |
| 1599361 | 1604716 | -      | 4               | gcvP, gcsH, PMM1670, PMM1671                                                          |
| 926568  | 931720  | +      | 5               | urtA, urtB, urtC, urtD, urtE                                                          |
| 1623197 | 1628319 | +      | 5               | pyrG, PMM1690, PMM1691, PMM1692, PMM1693                                              |
| 569751  | 574840  | +      | 5               | PMM0600, PMM0601, PMM0602, PMM0603, PMM0604                                           |
| 1450922 | 1455790 | +      | 2               | glfF, PMM1513                                                                         |
| 74373   | 79121   | -      | 4               | PMM0070, PMM0071, PMM0072, PMM0073                                                    |
| 477171  | 481864  | -      | 4               | PMM0505, purA, adeK, psb27, proS                                                      |
| 708634  | 713327  | +      | 6               | pcyA, PMM0748, PMM0749, PMM0750, PMM0751, PMM0752                                     |
| 59496   | 64148   | +      | 2               | PMM0057, PMM0058                                                                      |
| 1649575 | 1654209 | -      | 2               | uvrA, recN                                                                            |
| 907197  | 911829  | -      | 6               | PMM0948, PMM0949, rsbV, carA, trpD, PMM0953                                           |
| 244685  | 249266  | -      | 4               | leuD, leuC, PMM0257, glyA                                                             |
| 1403281 | 1407851 | +      | 5               | bioF, PMM1469, PMM1470, BioD, BioA                                                    |
| 1461905 | 1466465 | -      | 2               | psaB, psaA                                                                            |
| 1030010 | 1034552 | -      | 3               | tofF, gldA, clpC                                                                      |
| 1379976 | 1384477 | +      | 4               | PMM1443, PMM1444, nadD, PMM1446                                                       |
| 832609  | 837108  | -      | 2               | metH, ilvE                                                                            |
| 790292  | 794787  | +      | 7               | dapB, PMM0833, ubiH, PMM0835, PMM0836, PMM0837, PMM0838                               |
| 1558374 | 1562820 | -      | 5               | PMM1630, PMM1631, PMM1632, PMM1633, gyrB                                              |
| 638594  | 642922  | -      | 4               | PMM0671, PMM0672, PMM0673, aspC                                                       |
| 1013873 | 1018110 | -      | 3               | cbiA, cobB, PMM1073, zwf                                                              |
| 174     | 4383    | +      | 3               | dnaN, PMM0002, purL                                                                   |
| 1274850 | 1279020 | +      | 5               | PMM1323, PMM1324, PMM1325, PMM1326, PMM1327                                           |
| 10367   | 14526   | +      | 4               | PMM0008, nusB, ftsY, PMM0011                                                          |
| 152080  | 156231  | -      | 6               | PMM0155, ppnK, ndhE, ndhG, ndhI, ndhA                                                 |
| 40052   | 44190   | -      | 3               | PMM0041, PMM0042, PMM0043                                                             |
| 210201  | 214315  | +      | 4               | PMM0216, mutS, obgE, PMM0219                                                          |
| 191925  | 195968  | -      | 5               | hisC/cobC, pyrD, rnhA, rplL, rplJ                                                     |
| 1606266 | 1610275 | +      | 3               | dnaB, PMM1675, PMM1676                                                                |
| 1096353 | 1100323 | -      | 4               | PMM1144, pntB, pntA-2, pntA-1                                                         |
| 88020   | 91964   | +      | 3               | PMM0083, PMM0084, PMM0085                                                             |
| 1635543 | 1639484 | +      | 2               | acnB, PMM1701                                                                         |
| 993604  | 997537  | -      | 5               | thrA, hom, PMM1052, PMM1053, ruvC, chlI                                               |
| 975567  | 979494  | +      | 3               | PMM1032, PMM1033, PMM1034                                                             |
| 126143  | 130037  | -      | 3               | holB, PMM0130, PMM0131                                                                |
| 1124366 | 1128233 | -      | 3               | PMM1177, PMM1178, PMM1179                                                             |
| 1043002 | 1046851 | -      | 3               | PMM1099, PMM1100, PMM1101                                                             |
| 352975  | 356820  | +      | 4               | PMM0370, PMM0371, PMM0372, cynS                                                       |
| 1002199 | 1006038 | +      | 2               | gyrA, crtL1                                                                           |
| 857094  | 860917  | -      | 4               | PMM0894, PMM0895, dnaJ2, dnaK                                                         |
| 1149095 | 1152910 | -      | 4               | PMM1201, PMM1202, rfbG, ddhA                                                          |
| 177069  | 180883  | -      | 3               | hisC, argS, nadC                                                                      |
| 1508995 | 1512703 | -      | 3               | PMM1579, rodA, PMM1581                                                                |
| 863832  | 867515  | +      | 6               | htpG, rpmB, PMM0903, PMM0904, PMM0905, psaK                                           |
| 289627  | 293290  | -      | 2               | PMM0303, uvrD                                                                         |
| 173420  | 177072  | +      | 6               | prfB, PMM0181, PMM0182, dgkA, pabA, PMM0185                                           |
| 98735   | 102370  | -      | 3               | PMM0096, PMM0097, PMM0098                                                             |
| 1258409 | 1262024 | +      | 4               | PMM1305, ddl, PMM1307, PMM1308                                                        |
| 1060080 | 1063692 | -      | 4               | PMM1114, crtH, gidA, pbsY                                                             |
| 581401  | 585009  | -      | 3               | glmU, PMM0612, aroA                                                                   |
| 676875  | 680425  | -      | 3               | PMM0711, PMM0712, gap1                                                                |

|         |         |   |   |                                       |
|---------|---------|---|---|---------------------------------------|
| 1538208 | 1541750 | + | 3 | acpP, fabF, tktA                      |
| 1654279 | 1657817 | + | 3 | PMM1714, PMM1715, thrC                |
| 916593  | 920110  | - | 3 | PMM0959, PMM0960, PMM0961             |
| 422426  | 425917  | - | 4 | PMM0443, ctaE, ctaD, ctaC             |
| 229639  | 233103  | + | 2 | PMM0237, ileS                         |
| 1502288 | 1505707 | - | 2 | PMM1574, ppc                          |
| 1290576 | 1293983 | + | 2 | purD, nblS                            |
| 318175  | 321573  | - | 4 | FPG, psaE, PMM0330, PMM0331           |
| 888188  | 891578  | - | 3 | secF, secD, pdhB                      |
| 1613535 | 1616904 | - | 2 | PMM1681, valS                         |
| 1629153 | 1632509 | + | 2 | PMM1695, ppk                          |
| 1562973 | 1566307 | + | 4 | miaA, infC, PMM1637, cysE             |
| 387242  | 390561  | - | 3 | PMM0408, metB, rpsD                   |
| 1446430 | 1449748 | - | 2 | tuf, fusA                             |
| 921384  | 924678  | - | 4 | ureC, ureB, ureA, ureD                |
| 488453  | 491727  | + | 3 | PMM0517, ftsI, tal                    |
| 805514  | 808778  | - | 4 | zam, PMM0848, PMM0849, PMM0850        |
| 981474  | 984734  | + | 3 | PMM1038, PMM1039, PMM1040             |
| 306489  | 309735  | - | 3 | minC, PMM0323, ctpA                   |
| 823040  | 826283  | - | 4 | metG, PMM0868, rpsR, rpmG             |
| 1229209 | 1232440 | - | 4 | PMM1278, PMM1279, PMM1280, era        |
| 1543322 | 1546553 | - | 4 | PMM1612, PMM1613, PMM1614, ruvB       |
| 1520852 | 1524069 | - | 5 | PMM1591, pebB, pebA, ho1, PMM1595     |
| 370993  | 374209  | + | 4 | engA, PMM0392, PMM0393, PMM0394       |
| 438164  | 441311  | - | 4 | cobM, yvoC, petA, petC                |
| 1525676 | 1528817 | - | 3 | PMM1597, PMM1598, PMM1599             |
| 379082  | 382186  | + | 3 | lipB, fadD, PMM0403                   |
| 734287  | 737385  | + | 4 | gnd, PMM0771, PMM0772, PMM0773        |
| 167587  | 170668  | - | 3 | menE, menC, menA                      |
| 1247716 | 1250792 | - | 3 | trpC, lpdA, spoU                      |
| 18283   | 21295   | + | 4 | grpE, dnaJ, PMM0018, PMM0019          |
| 426170  | 429153  | + | 3 | PMM0447, ctaB, PMM0449                |
| 527242  | 530220  | + | 3 | hisG, PMM0561, PMM0562                |
| 269602  | 272567  | - | 3 | PMM0280, hisB, fabI                   |
| 81171   | 84133   | + | 2 | pgm, yrvN                             |
| 406258  | 409210  | - | 3 | PMM0427, chlG, PMM0429                |
| 205971  | 208916  | - | 3 | PMM0212, sbtA, PMM0214                |
| 499746  | 502658  | - | 3 | PMM0528, PMM0529, rps1b               |
| 725513  | 728423  | + | 3 | typA, PMM0763, PMM0764                |
| 1233875 | 1236761 | - | 3 | phoH, psiH, rpsP, ffh                 |
| 1578026 | 1580904 | - | 2 | uvrB, PMM1650                         |
| 613198  | 616075  | - | 2 | PMM0644, PMM0645                      |
| 990673  | 993541  | - | 3 | PMM1048, PMM1049, PMM1050             |
| 1591512 | 1594380 | - | 2 | PMM1659, PMM1660                      |
| 513553  | 516393  | - | 2 | chlB, chlN                            |
| 578565  | 581398  | + | 2 | glgA, murF                            |
| 441721  | 444553  | - | 3 | PMM0464, PMM0465, PMM0466             |
| 1216960 | 1219777 | - | 2 | PMM1263, ftsH3                        |
| 1575216 | 1578017 | + | 2 | PMM1647, lysC                         |
| 143954  | 146728  | + | 2 | PMM0148, ndhF                         |
| 504457  | 507217  | + | 3 | PMM0533, accA, PMM0535                |
| 108003  | 110754  | - | 3 | PMM0104, ribG, PMM0106                |
| 1133930 | 1136661 | + | 3 | serS, PMM1189, rpsN                   |
| 899088  | 901786  | + | 5 | PMM0940, PMM0941, ruvA, rpsO, PMM0944 |
| 21261   | 23953   | - | 3 | PMM0020, murB, murC                   |
| 671290  | 673975  | - | 2 | PMM0707, PMM0708                      |
| 846450  | 849130  | - | 3 | PMM0886, nifS, dapF                   |
| 1434244 | 1436918 | + | 2 | PMM1496, PMM1497                      |
| 685879  | 688537  | + | 3 | pstC, phoW, pstA, phoT, PMM0725       |
| 575865  | 578519  | + | 2 | menD, menB                            |
| 462266  | 464918  | - | 2 | futB, hitB, PMM0490                   |
| 737403  | 740043  | - | 3 | ilvD, PMM0775, PMM0776                |
| 1505761 | 1508400 | - | 2 | PMM1576, trpE                         |
| 1255497 | 1258126 | - | 2 | PMM1303, codA                         |
| 1131179 | 1133805 | + | 2 | PMM1186, PMM1187                      |
| 1547126 | 1549740 | - | 3 | PMM1617, lysS, PMM1619                |
| 274511  | 277122  | - | 3 | phr, PMM0286, folk                    |
| 1617516 | 1620104 | + | 3 | mazG, speE, PMM1686                   |
| 484307  | 486891  | - | 2 | PMM0514, cobC                         |
| 933470  | 936042  | + | 3 | PMM0976, PMM0977, PMM0978             |
| 810354  | 812916  | + | 2 | ftsH4, PMM0855                        |
| 68803   | 71353   | - | 3 | hli2, PMM0065, PMM0066                |
| 134349  | 136892  | + | 3 | fabH, fabD, plsC                      |

|         |         |   |   |                                    |
|---------|---------|---|---|------------------------------------|
| 219107  | 221616  | - | 2 | PMM0225, ftsH2                     |
| 472859  | 475364  | - | 3 | PMM0498, argB, PMM0500             |
| 911909  | 914414  | + | 2 | PMM0954, msrA                      |
| 1302241 | 1304746 | - | 2 | prmA, serA                         |
| 383670  | 386168  | + | 2 | pdhC, queA                         |
| 1253002 | 1255500 | + | 2 | argD, folC                         |
| 296547  | 299024  | - | 2 | PMM0310, metK                      |
| 706117  | 708593  | - | 2 | PMM0745, PMM0746                   |
| 842214  | 844682  | - | 2 | uvrC, PMM0883                      |
| 1190636 | 1193092 | + | 2 | hetA, PMM1240                      |
| 776518  | 778961  | - | 4 | PMM0821, K8K14.9, PMM0823, PMM0824 |
| 1107613 | 1110055 | + | 2 | psbD, psbC                         |
| 102557  | 104991  | + | 2 | PMM0099, nadB                      |
| 491753  | 494164  | - | 3 | PMM0520, frr, pyrH                 |
| 861281  | 863682  | + | 3 | petF, PMM0899, hisZ                |
| 1440558 | 1442949 | + | 2 | PMM1501, rnhB                      |
| 744191  | 746566  | - | 3 | PMM0782, PMM0783, accD             |
| 631192  | 633554  | + | 2 | PMM0662, prfC                      |
| 1596609 | 1598964 | + | 2 | sqdB, sqdX                         |
| 139518  | 141867  | - | 2 | crtB,pys, pds,crtD                 |
| 1213939 | 1216288 | + | 2 | PMM1260, ugd                       |
| 1549913 | 1552259 | - | 3 | PMM1620, mreC, mreB                |
| 34925   | 37269   | + | 2 | guaA, PMM0038                      |
| 1011546 | 1013876 | + | 3 | folD, crtE, PMM1071                |
| 730434  | 732754  | + | 2 | glpX, hemA                         |
| 1279010 | 1281319 | - | 3 | pyrF, tyrS, PMM1330                |
| 368613  | 370920  | + | 4 | aroD, PMM0388, cbiI/cbiL, PMM0390  |
| 116503  | 118799  | + | 4 | PMM0116, PMM0117, PMM0118, PMM0119 |
| 558202  | 560483  | + | 3 | proA, folB, PMM0592                |
| 1211578 | 1213846 | + | 2 | PMM1258, PMM1259                   |
| 1027581 | 1029845 | + | 2 | cad, PMM1085                       |
| 1206280 | 1208536 | - | 2 | PMM1254, PMM1255                   |
| 1471482 | 1473736 | - | 4 | prfA, rpmE, rpsI, rplM             |
| 1202291 | 1204539 | - | 2 | PMM1250, PMM1251                   |
| 610958  | 613191  | + | 2 | cysD, metA                         |
| 412094  | 414315  | - | 2 | PMM0434, ndhB                      |
| 1226538 | 1228724 | + | 3 | ribF, thiE, PMM1275                |
| 242502  | 244681  | + | 2 | psbI, PMM0254                      |
| 460093  | 462269  | + | 2 | PMM0487, PMM0488                   |
| 606272  | 608444  | - | 2 | PMM0638, stpA                      |
| 1409390 | 1411559 | - | 4 | PMM1476, PMM1477, PMM1478, PMM1479 |
| 1158248 | 1160415 | - | 2 | galE, PMM1210                      |
| 1428101 | 1430265 | + | 3 | PMM1491, nusA, PMM1493             |
| 465856  | 468011  | + | 2 | cxp, ppa                           |
| 132148  | 134295  | + | 2 | rpaB, plsX                         |
| 894799  | 896939  | + | 3 | PMM0936, umuC, PMM0938             |
| 891762  | 893874  | - | 3 | PMM0931, ispE, ksgA                |
| 1281470 | 1283579 | + | 2 | PMM1331, PMM1332                   |
| 390657  | 392746  | + | 3 | PMM0411, PMM0412, murE             |
| 1552760 | 1554840 | - | 2 | PMM1624, ahcY                      |
| 25173   | 27243   | - | 2 | thiL, PMM0025                      |
| 782376  | 784444  | - | 2 | PMM0826, PMM0827                   |
| 1156082 | 1158142 | - | 2 | PMM1207, gmd                       |
| 267567  | 269599  | + | 2 | PMM0278, PMM0279                   |
| 377005  | 379037  | - | 3 | PMM0398, PMM0399, lrtA             |
| 546886  | 548918  | - | 2 | PMM0582, hemE                      |
| 393515  | 395523  | - | 2 | PMM0415, PMM0416                   |
| 600795  | 602798  | - | 2 | PMM0632, crtL2                     |
| 943361  | 945357  | - | 2 | PMM0990, PMM0991                   |
| 1268128 | 1270118 | + | 2 | ilvC, cobD                         |
| 1223093 | 1225080 | - | 2 | ppnK, pheS                         |
| 202752  | 204736  | - | 2 | PMM0209, PMM0210                   |
| 635907  | 637881  | + | 3 | PMM0667, PMM0668, PMM0669          |
| 1594472 | 1596442 | + | 4 | rpmI, rplT, PMM1663, thiG          |
| 1393437 | 1395380 | + | 2 | ccdA, ycf44                        |
| 148684  | 150625  | + | 2 | PMM0151, PMM0152                   |
| 1219892 | 1221831 | - | 3 | ribD, PMM1266, PMM1267             |
| 1584044 | 1585980 | - | 2 | dapA, asd                          |
| 114476  | 116403  | - | 2 | PMM0114, crtQ                      |
| 28330   | 30250   | - | 2 | pdxA, PMM0029                      |
| 1375858 | 1377771 | + | 2 | atpB, atpC                         |
| 494294  | 496189  | - | 2 | cobO, PMM0524                      |
| 593891  | 595768  | + | 3 | hisS, PMM0624, PMM0625             |

|         |         |   |   |                                    |
|---------|---------|---|---|------------------------------------|
| 669400  | 671273  | + | 2 | phoB, phoR                         |
| 1371677 | 1373549 | + | 2 | pgml, secG                         |
| 482478  | 484344  | + | 4 | PMM0510, ppa, PMM0512, lepB        |
| 1161772 | 1163628 | - | 2 | PMM1212, PMM1213                   |
| 272674  | 274526  | + | 2 | PMM0283, degT                      |
| 551361  | 553213  | - | 2 | PMM0585, PMM0586                   |
| 186826  | 188657  | - | 2 | rluD, rbgA                         |
| 236686  | 238500  | - | 3 | thyX, dcd, PMM0245                 |
| 1057133 | 1058940 | + | 4 | PMM1108, PMM1109, PMM1110, PMM1111 |
| 8416    | 10219   | - | 2 | PMM0006, PMM0007                   |
| 1110791 | 1112568 | + | 2 | cobB, PMM1161                      |
| 434126  | 435898  | - | 2 | PMM0455, ubiA                      |
| 1611496 | 1613264 | + | 2 | PMM1678, lig                       |
| 643157  | 644911  | + | 2 | PMM0675, ispG                      |
| 924726  | 926463  | + | 3 | ureE, ureF, ureG                   |
| 905364  | 907093  | - | 2 | gatA, PMM0947                      |
| 1491573 | 1493294 | - | 2 | PMM1563, PMM1564                   |
| 279339  | 281008  | - | 2 | PMM0289, PMM0290                   |
| 597856  | 599525  | + | 2 | PMM0628, PMM0629                   |
| 1101190 | 1102859 | + | 2 | PMM1149, PMM1150                   |
| 120073  | 121735  | - | 2 | PMM0122, cysK2                     |
| 165925  | 167573  | + | 2 | ndhH, PMM0173                      |
| 453269  | 454916  | + | 2 | PMM0479, PMM0480                   |
| 300941  | 302587  | - | 2 | psbT, psbB                         |
| 303280  | 304919  | + | 3 | psbM, hemK, PMM0319                |
| 282495  | 284126  | - | 3 | ndhJ, ndhK, ndhC                   |
| 540814  | 542434  | - | 3 | PMM0575, PMM0576, PMM0577          |
| 1646439 | 1648051 | + | 3 | PMM1708, mraY, PMM1710             |
| 1515294 | 1516901 | - | 2 | PMM1585, PMM1586                   |
| 1444352 | 1445944 | - | 2 | PMM1505, PMM1506                   |
| 1438677 | 1440259 | - | 2 | clpS, PMM1500                      |
| 740106  | 741683  | + | 2 | PMM0777, cobW                      |
| 760044  | 761605  | - | 3 | PMM0800, ycf39, PMM0802            |
| 999094  | 1000647 | - | 3 | PMM1059, hisH, trxA                |
| 1129553 | 1131106 | + | 4 | PMM1182, rpmH, rnpA, PMM1185       |
| 784615  | 786166  | + | 2 | tpiA, folP                         |
| 1104668 | 1106218 | + | 2 | PMM1153, ilvH                      |
| 1094783 | 1096332 | + | 2 | dxr, PMM1143                       |
| 634282  | 635821  | - | 2 | hslO, PMM0666                      |
| 226153  | 227666  | - | 2 | pyrB, PMM0234                      |
| 409270  | 410775  | + | 2 | hisF, PMM0431                      |
| 1040819 | 1042320 | - | 2 | lipA, lip, recR                    |
| 525728  | 527198  | - | 3 | PMM0557, PMM0558, PMM0559          |
| 1487908 | 1489378 | + | 2 | PMM1559, PMM1560                   |
| 223922  | 225389  | - | 2 | dfp, PMM0230                       |
| 1604745 | 1606207 | + | 2 | des9, rplI                         |
| 284199  | 285650  | + | 2 | rub, PMM0296                       |
| 341600  | 343044  | + | 2 | PMM0357, thiD                      |
| 538345  | 539780  | + | 3 | ndhL, PMM0571, trpA                |
| 955448  | 956880  | - | 2 | purT, PMM1005                      |
| 651412  | 652836  | + | 2 | purK, SsrS                         |
| 85259   | 86680   | - | 2 | PMM0080, cysH                      |
| 264658  | 266070  | + | 2 | pyrE, PMM0276                      |
| 886571  | 887982  | + | 2 | psb28, PMM0927                     |
| 239494  | 240903  | + | 2 | PMM0247, PMM0248                   |
| 113083  | 114483  | + | 3 | PMM0111, rbfA, hemD                |
| 374367  | 375756  | + | 2 | PMM0395, proC                      |
| 820328  | 821686  | - | 3 | PMM0862, cobU/cobP, PMM0864        |
| 1304849 | 1306207 | + | 2 | PMM1355, PMM1356                   |
| 429207  | 430551  | + | 2 | PMM0450, PMM0451                   |
| 882897  | 884227  | + | 2 | PMM0921, PMM0922                   |
| 1266710 | 1268011 | + | 2 | clpP4, clpP                        |
| 530222  | 531519  | - | 2 | PMM0563, PMM0564                   |
| 958893  | 960188  | + | 2 | PMM1009, PMM1010                   |
| 260796  | 262088  | + | 2 | tgt, psbK                          |
| 97375   | 98660   | - | 2 | PMM0094, PMM0095                   |
| 681401  | 682685  | - | 2 | PMM0716, PMM0717                   |
| 1351144 | 1352411 | - | 4 | PMM1406, PMM1407, PMM1408, PMM1409 |
| 445994  | 447252  | + | 2 | PMM0470, hli20                     |
| 1390606 | 1391856 | - | 2 | atpI, atp1                         |
| 840919  | 842158  | - | 2 | PMM0880, PMM0881                   |
| 1120321 | 1121553 | - | 2 | PMM1170, isiB                      |
| 884216  | 885443  | - | 2 | PMM0923, PMM0924                   |

|         |         |   |   |                            |
|---------|---------|---|---|----------------------------|
| 1128287 | 1129487 | + | 2 | sppA, tyrA                 |
| 196161  | 197360  | - | 2 | rplA, rplK                 |
| 172160  | 173343  | - | 2 | gshB, PMM0179              |
| 309806  | 310987  | + | 2 | petB, petD                 |
| 1306399 | 1307560 | + | 2 | PMM1357, PMM1358           |
| 997801  | 998954  | - | 2 | PMM1056, cytM              |
| 961832  | 962973  | + | 2 | PMM1013, PMM1014           |
| 305233  | 306371  | - | 2 | minE, minD                 |
| 476059  | 477191  | + | 2 | PMM0503, PMM0504           |
| 1362259 | 1363390 | - | 3 | PMM1420, PMM1421, PMM1422  |
| 940658  | 941780  | + | 3 | PMM0985, PMM0986, rpsU     |
| 1103512 | 1104631 | - | 2 | ycf39, petM                |
| 1245526 | 1246643 | + | 2 | PMM1293, PMM1294           |
| 1139925 | 1141028 | + | 2 | PMM1193, PMM1194           |
| 1423552 | 1424646 | - | 2 | PMM1486, rpsT              |
| 808959  | 810036  | + | 2 | PMM0851, PMM0852           |
| 27287   | 28353   | + | 2 | efp, accB, fabE            |
| 1314462 | 1315494 | - | 2 | PMM1367, PMM1368           |
| 1121694 | 1122700 | + | 2 | PMM1172, PMM1173           |
| 31101   | 32091   | - | 2 | PMM0032, PMM0033           |
| 160714  | 161695  | + | 2 | PMM0165, cysC              |
| 574845  | 575813  | - | 2 | PMM0605, lepB              |
| 71401   | 72368   | - | 2 | PMM0067, def               |
| 141958  | 142919  | + | 2 | PMM0145, PMM0146           |
| 357535  | 358490  | - | 3 | PMM0376, PMM0377, PMM0378  |
| 121892  | 122846  | + | 2 | PMM0124, PMM0125           |
| 1270652 | 1271598 | - | 3 | PMM1318, PMM1319, PMM1320  |
| 969422  | 970361  | + | 3 | PMM1023, PMM1024, PMM1025  |
| 742007  | 742924  | + | 2 | PMM0779, purQ              |
| 136897  | 137805  | - | 2 | PMM0139, ycf34             |
| 1456993 | 1457893 | + | 2 | PMM1515, PMM1516           |
| 763548  | 764442  | - | 2 | PMM0805, PMM0806           |
| 620091  | 620976  | - | 2 | PMM0650, PMM0651           |
| 1449853 | 1450727 | - | 2 | rps7, rpsL                 |
| 344032  | 344904  | + | 2 | PMM0360, PMM0361           |
| 240884  | 241753  | - | 2 | PMM0249, pth               |
| 553268  | 554127  | - | 2 | PMM0587, PMM0588           |
| 1569781 | 1570637 | - | 2 | PMM1641, PMM1642           |
| 57789   | 58637   | - | 2 | PMM0054, PMM0055           |
| 1354682 | 1355490 | + | 2 | PMM1412, PMM1413           |
| 450648  | 451453  | - | 2 | rplS, PMM0476              |
| 359690  | 360486  | - | 2 | PMM0379, PMM0380           |
| 946932  | 947727  | + | 2 | PMM0994, PMM0995           |
| 332317  | 333110  | + | 2 | PMM0345, PMM0346           |
| 871171  | 871963  | + | 2 | PMM0909, PMM0910           |
| 1517250 | 1518042 | - | 2 | PMM1587, PMM1588           |
| 893891  | 894678  | + | 2 | PMM0934, PMM0935           |
| 464964  | 465746  | - | 2 | phhB, PMM0492              |
| 622839  | 623617  | - | 2 | PMM0655, PMM0656           |
| 1118243 | 1118991 | - | 2 | PMM1166, PMM1167           |
| 1301351 | 1302097 | - | 2 | PMM1351, petF              |
| 1459606 | 1460348 | - | 2 | psaL, psaI                 |
| 285777  | 286512  | + | 4 | psbE, psbF, psbL, psbJ     |
| 773065  | 773800  | - | 4 | hli19, hli18, hli17, hli16 |
| 1344939 | 1345674 | - | 4 | hli9, hli8, hli7, hli6     |
| 1570887 | 1571609 | - | 2 | ribH, psbZ                 |
| 1407861 | 1408582 | - | 2 | PMM1473, PMM1474           |
| 445200  | 445919  | - | 2 | psaJ, psaF                 |
| 360886  | 361597  | - | 2 | PMM0381, PMM0382           |
| 1296041 | 1296751 | + | 2 | rplU, rpmA                 |
| 294221  | 294926  | - | 2 | cpeS, PMM0307              |
| 1363451 | 1364150 | - | 2 | PMM1423, PMM1424           |
| 402171  | 402802  | + | 2 | PMM0423, PMM0424           |
| 1368721 | 1369331 | - | 2 | PMM1430, rpoZ              |
| 1395967 | 1396575 | + | 2 | PMM1462, glnB              |
| 92390   | 92994   | + | 2 | PMM0087, PMM0088           |
| 225590  | 226150  | + | 2 | PMM0231, PMM0232           |
| 107394  | 107938  | - | 2 | petL, PMM0103              |
| 249507  | 250049  | + | 2 | PMM0259, PMM0260           |
| 510866  | 511407  | + | 2 | psaM, PMM0541              |
| 950017  | 950551  | + | 2 | PMM0999, PMM1000           |
| 980848  | 981347  | - | 2 | PMM1036, PMM1037           |
| 665181  | 665674  | + | 2 | PMM0699, PMM0700           |

|         |         |   |   |                  |
|---------|---------|---|---|------------------|
| 936046  | 936539  | - | 2 | PMM0979, PMM0980 |
| 663181  | 663662  | - | 2 | PMM0696, PMM0697 |
| 658635  | 659028  | - | 2 | hli22, hli21     |
| 1334613 | 1334860 | + | 2 | hli12, hli11     |
